# Supplementary material for: Inhibition of Hsp90 Suppresses PI3K/AKT/mTOR Signaling and Has Antitumor Activity in Burkitt Lymphoma
Source: Oxford University Press journal article supplement (doi:10.1158/1535-7163.mct-16-0848), 2017-06-15
Supplement: 15357163mct160848-sup-175785_2_supp_4075426_sqvzsj.xls [file 15357163mct160848-sup-175785_2_supp_4075426_sqvzsj.xls]

## Sheet: Ramos
© 2000-2016 QIAGEN. All rights reserved.
Ingenuity Canonical Pathways	-log(p-value)	Ratio	z-score	Downregulated	Overlaps with dataset	Upregulated	No overlap with dataset	Molecules
EIF2 Signaling	3.85E01	3.03E-01	NaN	0/201 (0%)	61/201 (30%)	0/201 (0%)	140/201 (70%)	RPL11,MAPK1,EIF4A2,PIK3R4,RPS23,EIF3C/EIF3CL,RPS7,RPS3A,EIF3B,RPL7A,PIK3CG,MAPK3,RPL19,RPL12,RPL8,RPS10,ATM,PABPC1,RPL3,RPL23A,RPLP0,RPL10A,RPL15,RPS4X,EIF4A3,RPL10,EIF2B5,PIK3CD,RPLP1,RPSA,EIF3K,RPS18,RPS8,RPS13,RPL26,EIF4G1,RPS17/RPS17L,EIF2B2,RPL7,RPL6,RPL18A,RPS9,EIF3A,RPS3,RPL18,RPL13,RPL4,GRB2,RPS2,RPL17,EIF3J,RPL21,RPL9,EIF3G,RPL5,RPL28,UBA52,EIF4A1,EIF2B1,EIF3I,RPS14
Protein Ubiquitination Pathway	2.78E01	2.19E-01	NaN	0/270 (0%)	59/270 (22%)	0/270 (0%)	211/270 (78%)	PSMA3,PSMA7,USP5,PSMB8,SKP1,HSPA5,PSMC5,USP48,USP7,HSPA4,SUGT1,PSMA2,USP28,PSMA6,PSMB5,HSPA9,USP9X,PSMC4,PSME2,HSPA8,PSMD11,PSMB2,PSMA5,PSMB1,PSMA4,HSP90AA1,PSMD1,HSPB1,PSMB3,USP24,PSMD9,USP11,DNAJA1,ANAPC1,USO1,HSP90B1,PSMD10,HSP90AB1,USP13,PSMC6,USP47,PSMD14,PSMB4,PSMB9,USP15,HSPH1,PSMD13,PSMA1,HSPD1,UBE3A,PSMD8,PSMC1,PSME1,CUL2,PSMD2,DNAJB11,UBA1,USP34,PSMC3
Regulation of eIF4 and p70S6K Signaling	2.26E01	2.34E-01	NaN	0/175 (0%)	41/175 (23%)	0/175 (0%)	134/175 (77%)	MAPK1,PPP2R2A,PPP2CA,RPS18,RPS13,RPS8,EIF4A2,EIF4G1,RPS17/RPS17L,PIK3R4,RPS23,EIF3C/EIF3CL,EIF2B2,RPS7,MTOR,RPS3A,EIF3B,MAPK3,PIK3CG,RPS9,EIF3A,RPS3,RPS10,ATM,PABPC1,GRB2,RPS2,EIF3J,EIF3G,RPS4X,PPP2R1A,EIF4A3,EIF4A1,EIF2B1,EIF2B5,EIF3I,PIK3CD,PPP2R1B,RPS14,RPSA,EIF3K
mTOR Signaling	1.65E01	1.83E-01	NaN	0/213 (0%)	39/213 (18%)	0/213 (0%)	174/213 (82%)	MAPK1,PPP2R2A,PPP2CA,RPS18,RPS6KA3,RPS13,RPS8,EIF4A2,EIF4G1,RPS17/RPS17L,PIK3R4,EIF3C/EIF3CL,RPS23,RPS7,MTOR,RPS3A,EIF3B,MAPK3,PIK3CG,RPS9,EIF3A,RPS10,RPS3,ATM,EIF4B,RPS2,EIF3J,EIF3G,RPS4X,PPP2R1A,EIF4A3,EIF4A1,EIF3I,PIK3CD,PPP2R1B,FNBP1,RPS14,RPSA,EIF3K
Remodeling of Epithelial Adherens Junctions	1.5E01	3.29E-01	NaN	0/70 (0%)	23/70 (33%)	0/70 (0%)	47/70 (67%)	ACTR2,NME1,TUBB3,ARPC1B,TUBB4B,ACTB,MAPRE1,ARPC5,RAB7A,TUBA4A,IQGAP1,TUBB,TUBA1B,APC,ACTR3,ARPC2,ARPC3,MAPRE2,TUBB4A,ACTN4,DNM1L,ARPC4,DNM2
Mismatch Repair in Eukaryotes	1.02E01	4.17E-01	NaN	0/24 (0%)	10/24 (42%)	0/24 (0%)	14/24 (58%)	PCNA,PMS2,MSH2,RFC4,MSH6,RFC2,RPA1,RFC5,POLD1,MLH1
PI3K/AKT Signaling	9.16E00	1.51E-01	NaN	0/152 (0%)	23/152 (15%)	0/152 (0%)	129/152 (85%)	CDC37,YWHAG,YWHAH,MAPK1,YWHAE,YWHAB,GRB2,PPP2CA,PPP2R2A,YWHAZ,NFKB2,NFKB1,YWHAQ,HSP90B1,MTOR,PPP2R1A,HSP90AB1,PIK3CG,INPP5B,MAPK3,HSP90AA1,PIK3CD,PPP2R1B
14-3-3-mediated Signaling	8.84E00	1.82E-01	NaN	0/121 (0%)	22/121 (18%)	0/121 (0%)	99/121 (82%)	TUBB3,YWHAG,YWHAH,MAPK1,YWHAE,YWHAB,GRB2,TUBB4B,YWHAZ,TUBA4A,BAX,TUBB,PIK3R4,TUBA1B,YWHAQ,PIK3CG,PLCG2,MAPK3,TUBB4A,PIK3CD,PDCD6IP,ATM
tRNA Charging	8.84E00	1.6E-01	NaN	0/81 (0%)	13/81 (16%)	0/81 (0%)	68/81 (84%)	NARS,LARS,RARS,YARS,GARS,KARS,DARS,AARS,SARS,VARS,MARS,IARS,EPRS
p70S6K Signaling	8.62E00	1.67E-01	NaN	0/132 (0%)	22/132 (17%)	0/132 (0%)	110/132 (83%)	YWHAG,YWHAH,MAPK1,YWHAE,EEF2,YWHAB,GRB2,PPP2CA,PPP2R2A,YWHAZ,PIK3R4,YWHAQ,BTK,MTOR,PPP2R1A,SYK,PIK3CG,PLCG2,MAPK3,PIK3CD,PPP2R1B,ATM
Rac Signaling	8.27E00	1.56E-01	NaN	0/128 (0%)	20/128 (16%)	0/128 (0%)	108/128 (84%)	ACTR2,PTK2B,MAPK1,ARPC1B,ARPC5,MAP3K1,NFKB2,IQGAP1,PIK3R4,NFKB1,ARFIP2,CYFIP2,ACTR3,MAPK3,PIK3CG,ARPC2,ARPC3,PIK3CD,ARPC4,ATM
Hereditary Breast Cancer Signaling	8.16E00	1.57E-01	NaN	0/134 (0%)	21/134 (16%)	0/134 (0%)	113/134 (84%)	PMS2,RPA1,POLR2B,PIK3R4,RFC5,SMARCA4,CDK1,MLH1,HDAC6,POLR2C,POLR2A,MSH2,FANCD2,RFC4,POLR2E,PIK3CG,MSH6,RFC2,POLR2H,PIK3CD,ATM
Huntington's Disease Signaling	7.55E00	1.15E-01	NaN	0/252 (0%)	29/252 (12%)	0/252 (0%)	223/252 (88%)	MAPK1,PACSIN1,GNB2L1,POLR2B,PIK3R4,HSPA5,HDAC6,HSPA4,MTOR,ARFIP2,POLR2A,POLR2C,PIK3CG,MAPK3,POLR2H,DNM2,ATM,GRB2,HSPA9,CLTC,HIP1,BAX,HSPA8,ATP5B,POLR2E,GNB2,DCTN1,PIK3CD,DNM1L
Clathrin-mediated Endocytosis Signaling	7.53E00	1.31E-01	NaN	0/198 (0%)	26/198 (13%)	0/198 (0%)	172/198 (87%)	EPS15,ARPC1B,ARPC5,PIK3R4,ACTR3,RAB11B,PIK3CG,CSNK2A1,ARPC3,CSNK2B,DNM2,ATM,ACTR2,GRB2,ACTB,USP9X,CLTC,RAB7A,HIP1,HSPA8,ARPC2,TFRC,PIK3CD,DNM1L,ARPC4,MYO1E
Glucocorticoid Receptor Signaling	6.58E00	1E-01	NaN	0/299 (0%)	30/299 (10%)	0/299 (0%)	269/299 (90%)	MAPK1,YWHAH,GTF2F2,GTF2E2,POLR2B,PIK3R4,NFKB1,HSPA5,SMARCA4,HSPA4,HSP90B1,POLR2C,POLR2A,HSP90AB1,PIK3CG,MAPK3,POLR2H,STAT5B,FKBP5,ATM,GRB2,HSPA9,MAP3K1,GTF2F1,HSPA8,POLR2E,FKBP4,HSP90AA1,PIK3CD,TAF15
VEGF Signaling	6.12E00	1.47E-01	NaN	0/109 (0%)	16/109 (15%)	0/109 (0%)	93/109 (85%)	PTK2B,YWHAE,MAPK1,GRB2,ACTB,PIK3R4,EIF2B2,ELAVL1,PLCG2,PIK3CG,MAPK3,EIF2B1,EIF2B5,PIK3CD,ACTN4,ATM
Fcγ Receptor-mediated Phagocytosis in Macrophages and Monocytes	6.05E00	1.51E-01	NaN	0/106 (0%)	16/106 (15%)	0/106 (0%)	90/106 (85%)	ACTR2,PTK2B,MAPK1,ARPC1B,ACTB,ARPC5,TLN1,ACTR3,RAB11B,MAPK3,ARPC2,PIK3CG,SYK,ARPC3,VAV1,ARPC4
IL-2 Signaling	6E00	1.97E-01	NaN	0/61 (0%)	12/61 (20%)	0/61 (0%)	49/61 (80%)	MAPK1,PTK2B,GRB2,PIK3CG,SYK,MAPK3,CSNK2A1,PIK3CD,CSNK2B,STAT5B,PIK3R4,ATM
fMLP Signaling in Neutrophils	5.77E00	1.29E-01	NaN	0/132 (0%)	17/132 (13%)	0/132 (0%)	115/132 (87%)	ACTR2,ACTR3,ARPC1B,MAPK1,MAPK3,PIK3CG,ARPC2,GNB2L1,ARPC5,GNB2,ARPC3,PIK3CD,NFKB2,NFKB1,PIK3R4,ARPC4,ATM
Epithelial Adherens Junction Signaling	5.76E00	1.3E-01	NaN	0/154 (0%)	20/154 (13%)	0/154 (0%)	134/154 (87%)	RAP1B,ACTR2,TUBB3,MYL6,ARPC1B,TUBB4B,ACTB,ARPC5,TUBA4A,IQGAP1,TUBB,TUBA1B,APC,ACTR3,ARPC2,ARPC3,MYH9,TUBB4A,ACTN4,ARPC4
Actin Cytoskeleton Signaling	5.72E00	1.03E-01	NaN	0/242 (0%)	25/242 (10%)	0/242 (0%)	217/242 (90%)	ACTR2,ARPC1B,MAPK1,MYL6,GRB2,ACTB,CRKL,ARPC5,TLN1,PIK3R4,IQGAP1,APC,ACTR3,CYFIP2,ARPC2,PIK3CG,MAPK3,MYH9,ARPC3,VAV1,PIK3CD,ACTN4,NCKAP1L,ARPC4,ATM
AMPK Signaling	5.68E00	1.05E-01	NaN	0/181 (0%)	19/181 (10%)	0/181 (0%)	162/181 (90%)	MAPK1,PPP2CA,PPP2R2A,PFKL,PFKP,PIK3R4,SMARCA4,PPM1G,PFKM,PPP2R1A,MTOR,PPM1B,PIK3CG,FASN,ACACA,PIK3CD,PPP2R1B,PPAT,ATM
ERK/MAPK Signaling	5.66E00	1.09E-01	NaN	0/211 (0%)	23/211 (11%)	0/211 (0%)	188/211 (89%)	ETS1,RAP1B,YWHAG,YWHAH,PTK2B,MAPK1,YWHAB,PPP2R2A,GRB2,PPP2CA,CRKL,YWHAZ,TLN1,PIK3R4,YWHAQ,PPP2R1A,PIK3CG,PLCG2,MAPK3,PIK3CD,PPP2R1B,HSPB1,ATM
RAN Signaling	5.63E00	2.92E-01	NaN	0/24 (0%)	7/24 (29%)	0/24 (0%)	17/24 (71%)	KPNB1,KPNA3,CSE1L,TNPO1,RAN,XPO1,IPO5
Telomerase Signaling	5.56E00	1.51E-01	NaN	0/106 (0%)	16/106 (15%)	0/106 (0%)	90/106 (85%)	HDAC6,ETS1,PPP2R1A,HSP90B1,HSP90AB1,MAPK1,PPP2R2A,PPP2CA,GRB2,MAPK3,PIK3CG,HSP90AA1,PIK3CD,PIK3R4,PPP2R1B,ATM
Myc Mediated Apoptosis Signaling	5.56E00	1.9E-01	NaN	0/63 (0%)	12/63 (19%)	0/63 (0%)	51/63 (81%)	YWHAQ,YWHAG,YWHAE,YWHAH,GRB2,YWHAB,PIK3CG,YWHAZ,PIK3CD,BAX,PIK3R4,ATM
Aldosterone Signaling in Epithelial Cells	5.44E00	1.18E-01	NaN	0/169 (0%)	20/169 (12%)	0/169 (0%)	149/169 (88%)	MAPK1,HSPH1,HSPA9,HSPD1,PIK3R4,DNAJA1,HSPA5,HSPA8,HSPA4,HSP90B1,HSP90AB1,MAPK3,PIK3CG,PLCG2,DNAJB11,HSP90AA1,PIK3CD,ATM,HSPB1,AHCY
CD28 Signaling in T Helper Cells	5.39E00	1.25E-01	NaN	0/136 (0%)	17/136 (13%)	0/136 (0%)	119/136 (88%)	ACTR2,ARPC1B,GRB2,ARPC5,MAP3K1,NFKB2,PIK3R4,NFKB1,ACTR3,ARPC2,PIK3CG,SYK,ARPC3,VAV1,PIK3CD,ARPC4,ATM
Prostate Cancer Signaling	5.27E00	1.36E-01	NaN	0/103 (0%)	14/103 (14%)	0/103 (0%)	89/103 (86%)	HSP90B1,MTOR,HSP90AB1,MAPK1,GRB2,MAPK3,PIK3CG,HSP90AA1,PIK3CD,NFKB2,PIK3R4,NFKB1,GSTP1,ATM
IGF-1 Signaling	5.12E00	1.4E-01	NaN	0/107 (0%)	15/107 (14%)	0/107 (0%)	92/107 (86%)	YWHAQ,YWHAG,YWHAE,MAPK1,YWHAH,YWHAB,GRB2,MAPK3,PIK3CG,CSNK2A1,YWHAZ,PIK3CD,CSNK2B,PIK3R4,ATM
Cell Cycle: G2/M DNA Damage Checkpoint Regulation	5.11E00	2.04E-01	NaN	0/49 (0%)	10/49 (20%)	0/49 (0%)	39/49 (80%)	YWHAQ,PRKDC,YWHAG,YWHAE,YWHAH,YWHAB,YWHAZ,SKP1,CDK1,ATM
Role of CHK Proteins in Cell Cycle Checkpoint Control	4.99E00	1.86E-01	NaN	0/59 (0%)	11/59 (19%)	0/59 (0%)	48/59 (81%)	PCNA,PPP2R1A,RFC4,PPP2CA,PPP2R2A,RFC2,RPA1,RFC5,PPP2R1B,CDK1,ATM
Cell Cycle Control of Chromosomal Replication	4.99E00	2.35E-01	NaN	0/34 (0%)	8/34 (24%)	0/34 (0%)	26/34 (76%)	MCM5,MCM3,MCM6,MCM2,RPA1,MCM4,MCM7,RPA2
PDGF Signaling	4.94E00	1.51E-01	NaN	0/86 (0%)	13/86 (15%)	0/86 (0%)	73/86 (85%)	MAPK1,GRB2,INPP5B,PLCG2,CRKL,PIK3CG,MAPK3,MAP3K1,CSNK2A1,PIK3CD,CSNK2B,PIK3R4,ATM
Breast Cancer Regulation by Stathmin1	4.94E00	1.03E-01	NaN	0/214 (0%)	22/214 (10%)	0/214 (0%)	192/214 (90%)	TUBB3,MAPK1,PPP2R2A,GRB2,PPP2CA,TUBB4B,GNB2L1,TUBA4A,PIK3R4,TUBB,TUBA1B,CDK1,PPP2R1A,CAMK2D,PIK3CG,MAPK3,GNB2,ARHGEF18,TUBB4A,PIK3CD,PPP2R1B,ATM
EGF Signaling	4.91E00	1.72E-01	NaN	0/64 (0%)	11/64 (17%)	0/64 (0%)	53/64 (83%)	MTOR,MAPK1,GRB2,PIK3CG,MAPK3,MAP3K1,CSNK2A1,PIK3CD,CSNK2B,PIK3R4,ATM
NRF2-mediated Oxidative Stress Response	4.9E00	1.08E-01	NaN	0/195 (0%)	21/195 (11%)	0/195 (0%)	174/195 (89%)	AKR7A2,FTL,MAPK1,PRDX1,ACTB,MAP3K1,PIK3R4,DNAJA1,CUL3,STIP1,DNAJB11,MAPK3,PIK3CG,VCP,CCT7,DNAJA2,PIK3CD,FKBP5,GSTP1,ATM,FTH1
Integrin Signaling	4.8E00	1.06E-01	NaN	0/208 (0%)	22/208 (11%)	0/208 (0%)	186/208 (89%)	RAP1B,ACTR2,MAPK1,ARPC1B,GRB2,ACTB,CRKL,ARPC5,TLN1,PIK3R4,ARF1,ACTR3,PIK3CG,PLCG2,ARPC2,MAPK3,ARPC3,PIK3CD,ACTN4,FNBP1,ARPC4,ATM
Ceramide Signaling	4.75E00	1.43E-01	NaN	0/91 (0%)	13/91 (14%)	0/91 (0%)	78/91 (86%)	PPP2R1A,PPP2CA,PPP2R2A,PIK3CG,MAPK3,MAP3K1,PIK3CD,NFKB2,NFKB1,PIK3R4,DIABLO,PPP2R1B,ATM
Signaling by Rho Family GTPases	4.65E00	9.13E-02	NaN	0/263 (0%)	24/263 (9%)	0/263 (0%)	239/263 (91%)	ACTR2,PTK2B,MYL6,MAPK1,ARPC1B,ACTB,ARPC5,GNB2L1,NFKB2,IQGAP1,PIK3R4,NFKB1,ARFIP2,ACTR3,PIK3CG,ARPC2,MAPK3,GNB2,ARPC3,ARHGEF18,PIK3CD,FNBP1,ARPC4,ATM
B Cell Receptor Signaling	4.63E00	1.09E-01	NaN	0/175 (0%)	19/175 (11%)	0/175 (0%)	156/175 (89%)	ETS1,MAPK1,GRB2,MAP3K1,NFKB2,PIK3R4,NFKB1,BTK,MTOR,CAMK2D,SYK,PIK3CG,PLCG2,MAPK3,INPP5B,CD22,VAV1,PIK3CD,ATM
Role of BRCA1 in DNA Damage Response	4.62E00	1.55E-01	NaN	0/71 (0%)	11/71 (15%)	0/71 (0%)	60/71 (85%)	FANCD2,MSH2,RFC4,MSH6,RFC2,RPA1,BRCC3,RFC5,MLH1,SMARCA4,ATM
GM-CSF Signaling	4.41E00	1.62E-01	NaN	0/68 (0%)	11/68 (16%)	0/68 (0%)	57/68 (84%)	ETS1,CAMK2D,MAPK1,GRB2,PIK3CG,MAPK3,GNB2L1,PIK3CD,STAT5B,PIK3R4,ATM
Androgen Signaling	4.36E00	1.03E-01	NaN	0/145 (0%)	15/145 (10%)	0/145 (0%)	130/145 (90%)	MAPK1,GNB2L1,GTF2F1,GTF2E2,POLR2B,NFKB2,NFKB1,HSPA4,POLR2C,POLR2A,POLR2E,MAPK3,GNB2,POLR2H,HSP90AA1
Lymphotoxin β Receptor Signaling	4.29E00	1.61E-01	NaN	0/62 (0%)	10/62 (16%)	0/62 (0%)	52/62 (84%)	MAPK1,PIK3CG,MAPK3,IKBKAP,PIK3CD,NFKB2,NFKB1,PIK3R4,DIABLO,ATM
Role of PI3K/AKT Signaling in the Pathogenesis of Influenza	4.28E00	1.45E-01	NaN	0/76 (0%)	11/76 (14%)	0/76 (0%)	65/76 (86%)	KPNA3,MAPK1,CRKL,PIK3CG,MAPK3,PIK3CD,NFKB2,NFKB1,PIK3R4,MLH1,ATM
Estrogen Receptor Signaling	4.28E00	1.18E-01	NaN	0/136 (0%)	16/136 (12%)	0/136 (0%)	120/136 (88%)	PRKDC,MAPK1,GRB2,GTF2F2,GTF2F1,HNRNPD,POLR2B,SMARCA4,CTBP1,DDX5,POLR2C,POLR2A,POLR2E,MAPK3,POLR2H,TAF15
Nucleotide Excision Repair Pathway	4.22E00	2.22E-01	NaN	0/36 (0%)	8/36 (22%)	0/36 (0%)	28/36 (78%)	POLR2A,POLR2C,POLR2E,POLR2H,RPA1,POLR2B,RAD23B,RPA2
5-aminoimidazole Ribonucleotide Biosynthesis I	4.18E00	1.67E-01	NaN	0/18 (0%)	3/18 (17%)	0/18 (0%)	15/18 (83%)	PFAS,PPAT,GART
Erythropoietin Signaling	4.15E00	1.39E-01	NaN	0/79 (0%)	11/79 (14%)	0/79 (0%)	68/79 (86%)	MAPK1,GRB2,PLCG2,PIK3CG,MAPK3,PIK3CD,NFKB2,STAT5B,NFKB1,PIK3R4,ATM
Mitotic Roles of Polo-Like Kinase	4.15E00	1.49E-01	NaN	0/74 (0%)	11/74 (15%)	0/74 (0%)	63/74 (85%)	SMC3,HSP90B1,PPP2R1A,HSP90AB1,PPP2CA,PPP2R2A,HSP90AA1,PPP2R1B,ANAPC1,CDK1,SMC1A
Insulin Receptor Signaling	4.07E00	1.07E-01	NaN	0/149 (0%)	16/149 (11%)	0/149 (0%)	133/149 (89%)	MAPK1,GRB2,TRIP10,CRKL,PIK3R4,ACLY,EIF2B2,MTOR,INPP5B,PIK3CG,MAPK3,EIF2B1,EIF2B5,PIK3CD,STX4,ATM
Chronic Myeloid Leukemia Signaling	4E00	1.23E-01	NaN	0/106 (0%)	13/106 (12%)	0/106 (0%)	93/106 (88%)	HDAC6,CTBP1,MAPK1,GRB2,CRKL,PIK3CG,MAPK3,PIK3CD,NFKB2,STAT5B,NFKB1,PIK3R4,ATM
NGF Signaling	3.99E00	1.15E-01	NaN	0/122 (0%)	14/122 (11%)	0/122 (0%)	108/122 (89%)	RAP1B,MAPK1,GRB2,MAP3K1,RPS6KA3,NFKB2,BAX,NFKB1,PIK3R4,MAPK3,PIK3CG,PLCG2,PIK3CD,ATM
IL-15 Signaling	3.82E00	1.39E-01	NaN	0/72 (0%)	10/72 (14%)	0/72 (0%)	62/72 (86%)	MAPK1,PIK3CG,SYK,MAPK3,PIK3CD,NFKB2,STAT5B,NFKB1,PIK3R4,ATM
Role of JAK1 and JAK3 in γc Cytokine Signaling	3.76E00	1.47E-01	NaN	0/68 (0%)	10/68 (15%)	0/68 (0%)	58/68 (85%)	MAPK1,PTK2B,GRB2,PIK3CG,SYK,MAPK3,PIK3CD,STAT5B,PIK3R4,ATM
Germ Cell-Sertoli Cell Junction Signaling	3.71E00	1.01E-01	NaN	0/169 (0%)	17/169 (10%)	0/169 (0%)	152/169 (90%)	TUBB3,MAPK1,TUBB4B,ACTB,MAP3K1,TUBA4A,IQGAP1,TUBB,PIK3R4,TUBA1B,PIK3CG,MAPK3,TUBB4A,PIK3CD,ACTN4,FNBP1,ATM
FcγRIIB Signaling in B Lymphocytes	3.7E00	1.25E-01	NaN	0/64 (0%)	8/64 (13%)	0/64 (0%)	56/64 (88%)	BTK,GRB2,PLCG2,PIK3CG,SYK,PIK3CD,PIK3R4,ATM
Estrogen-Dependent Breast Cancer Signaling	3.7E00	1.37E-01	NaN	0/73 (0%)	10/73 (14%)	0/73 (0%)	63/73 (86%)	HSD17B10,MAPK1,PIK3CG,MAPK3,PIK3CD,NFKB2,STAT5B,NFKB1,PIK3R4,ATM
ILK Signaling	3.68E00	9.27E-02	NaN	0/205 (0%)	19/205 (9%)	0/205 (0%)	186/205 (91%)	MYL6,MAPK1,PPP2CA,PPP2R2A,ACTB,NFKB2,PIK3R4,NFKB1,MTOR,PPP2R1A,PIK3CG,MAPK3,MYH9,PIK3CD,ACTN4,PPP2R1B,FNBP1,DSP,ATM
CNTF Signaling	3.68E00	1.58E-01	NaN	0/57 (0%)	9/57 (16%)	0/57 (0%)	48/57 (84%)	MTOR,MAPK1,GRB2,PIK3CG,MAPK3,RPS6KA3,PIK3CD,PIK3R4,ATM
Acute Myeloid Leukemia Signaling	3.6E00	1.31E-01	NaN	0/84 (0%)	11/84 (13%)	0/84 (0%)	73/84 (87%)	MTOR,MAPK1,GRB2,PIK3CG,MAPK3,PIK3CD,NFKB2,STAT5B,NFKB1,PIK3R4,ATM
Proline Biosynthesis I	3.59E00	2.14E-01	NaN	0/14 (0%)	3/14 (21%)	0/14 (0%)	11/14 (79%)	PYCRL,PYCR2,PYCR1
Systemic Lupus Erythematosus Signaling	3.54E00	8.2E-02	NaN	0/256 (0%)	21/256 (8%)	0/256 (0%)	235/256 (92%)	MAPK1,SNRPB,GRB2,PRPF8,HNRNPA2B1,PRPF39,PIK3R4,SNRPA,MTOR,PIK3CG,EFTUD2,MAPK3,PLCG2,SNRPB2,CD22,SNRNP200,SNRNP70,IGHM,PIK3CD,SNRPA1,ATM
Thrombopoietin Signaling	3.49E00	1.41E-01	NaN	0/64 (0%)	9/64 (14%)	0/64 (0%)	55/64 (86%)	MAPK1,GRB2,PLCG2,PIK3CG,MAPK3,PIK3CD,STAT5B,PIK3R4,ATM
IL-9 Signaling	3.45E00	1.75E-01	NaN	0/40 (0%)	7/40 (18%)	0/40 (0%)	33/40 (83%)	PIK3CG,PIK3CD,NFKB2,STAT5B,NFKB1,PIK3R4,ATM
Actin Nucleation by ARP-WASP Complex	3.43E00	1.34E-01	NaN	0/67 (0%)	9/67 (13%)	0/67 (0%)	58/67 (87%)	ACTR2,ACTR3,ARPC1B,GRB2,ARPC2,ARPC5,ARPC3,FNBP1,ARPC4
T Cell Receptor Signaling	3.28E00	1.1E-01	NaN	0/109 (0%)	12/109 (11%)	0/109 (0%)	97/109 (89%)	BTK,MAPK1,GRB2,PIK3CG,MAPK3,MAP3K1,VAV1,PIK3CD,NFKB2,NFKB1,PIK3R4,ATM
Aryl Hydrocarbon Receptor Signaling	3.27E00	8.77E-02	NaN	0/171 (0%)	15/171 (9%)	0/171 (0%)	156/171 (91%)	MAPK1,POLA1,BAX,NFKB2,NFKB1,SMARCA4,AIP,HSP90B1,HSP90AB1,MAPK3,HSP90AA1,GSTP1,MCM7,ATM,HSPB1
Tec Kinase Signaling	3.23E00	8.7E-02	NaN	0/184 (0%)	16/184 (9%)	0/184 (0%)	168/184 (91%)	PTK2B,ACTB,GTF2I,GNB2L1,NFKB2,PIK3R4,NFKB1,BTK,PLCG2,PIK3CG,GNB2,VAV1,PIK3CD,STAT5B,FNBP1,ATM
HGF Signaling	3.16E00	1.08E-01	NaN	0/111 (0%)	12/111 (11%)	0/111 (0%)	99/111 (89%)	RAP1B,ETS1,MAPK1,GRB2,PLCG2,CRKL,PIK3CG,MAPK3,MAP3K1,PIK3CD,PIK3R4,ATM
NF-κB Activation by Viruses	3.12E00	1.2E-01	NaN	0/83 (0%)	10/83 (12%)	0/83 (0%)	73/83 (88%)	MAPK1,PIK3CG,MAPK3,MAP3K1,IKBKAP,PIK3CD,NFKB2,NFKB1,PIK3R4,ATM
Paxillin Signaling	3.12E00	1.03E-01	NaN	0/117 (0%)	12/117 (10%)	0/117 (0%)	105/117 (90%)	ARF1,ARFIP2,MAPK1,PTK2B,GRB2,PIK3CG,ACTB,TLN1,PIK3CD,ACTN4,PIK3R4,ATM
Assembly of RNA Polymerase II Complex	3.09E00	1.43E-01	NaN	0/56 (0%)	8/56 (14%)	0/56 (0%)	48/56 (86%)	POLR2A,POLR2C,POLR2E,POLR2H,GTF2E2,GTF2F1,POLR2B,TAF15
CTLA4 Signaling in Cytotoxic T Lymphocytes	3.09E00	1.15E-01	NaN	0/96 (0%)	11/96 (11%)	0/96 (0%)	85/96 (89%)	PPP2R1A,GRB2,PPP2CA,PPP2R2A,PIK3CG,SYK,CLTC,PIK3CD,PIK3R4,PPP2R1B,ATM
PKCθ Signaling in T Lymphocytes	3.09E00	9.03E-02	NaN	0/144 (0%)	13/144 (9%)	0/144 (0%)	131/144 (91%)	CAMK2D,MAPK1,GRB2,MAPK3,PIK3CG,PLCG2,MAP3K1,VAV1,PIK3CD,NFKB2,PIK3R4,NFKB1,ATM
FLT3 Signaling in Hematopoietic Progenitor Cells	3.08E00	1.27E-01	NaN	0/79 (0%)	10/79 (13%)	0/79 (0%)	69/79 (87%)	MTOR,MAPK1,GRB2,PIK3CG,MAPK3,RPS6KA3,PIK3CD,STAT5B,PIK3R4,ATM
CD40 Signaling	3.04E00	1.27E-01	NaN	0/71 (0%)	9/71 (13%)	0/71 (0%)	62/71 (87%)	MAPK1,PIK3CG,MAPK3,IKBKAP,PIK3CD,NFKB2,NFKB1,PIK3R4,ATM
Gα12/13 Signaling	3.02E00	1.02E-01	NaN	0/127 (0%)	13/127 (10%)	0/127 (0%)	114/127 (90%)	BTK,PTK2B,MYL6,MAPK1,MAPK3,PIK3CG,MAP3K1,VAV1,PIK3CD,NFKB2,PIK3R4,NFKB1,ATM
DNA Methylation and Transcriptional Repression Signaling	3E00	2.17E-01	NaN	0/23 (0%)	5/23 (22%)	0/23 (0%)	18/23 (78%)	CHD4,RBBP7,MTA2,DNMT1,RBBP4
Purine Nucleotides De Novo Biosynthesis II	3E00	9.52E-02	NaN	0/42 (0%)	4/42 (10%)	0/42 (0%)	38/42 (90%)	IMPDH2,PFAS,PPAT,GART
Antiproliferative Role of Somatostatin Receptor 2	2.99E00	1.25E-01	NaN	0/72 (0%)	9/72 (13%)	0/72 (0%)	63/72 (88%)	RAP1B,MAPK1,PIK3CG,MAPK3,GNB2L1,GNB2,PIK3CD,PIK3R4,ATM
Endometrial Cancer Signaling	2.97E00	1.33E-01	NaN	0/60 (0%)	8/60 (13%)	0/60 (0%)	52/60 (87%)	MAPK1,GRB2,PIK3CG,MAPK3,PIK3CD,PIK3R4,MLH1,ATM
Angiopoietin Signaling	2.94E00	1.2E-01	NaN	0/75 (0%)	9/75 (12%)	0/75 (0%)	66/75 (88%)	GRB2,PIK3CG,IKBKAP,PIK3CD,NFKB2,STAT5B,NFKB1,PIK3R4,ATM
Proline Biosynthesis II (from Arginine)	2.92E00	1.5E-01	NaN	0/20 (0%)	3/20 (15%)	0/20 (0%)	17/20 (85%)	PYCRL,PYCR2,PYCR1
Arginine Degradation VI (Arginase 2 Pathway)	2.92E00	1.88E-01	NaN	0/16 (0%)	3/16 (19%)	0/16 (0%)	13/16 (81%)	PYCRL,PYCR2,PYCR1
UVB-Induced MAPK Signaling	2.92E00	1.38E-01	NaN	0/58 (0%)	8/58 (14%)	0/58 (0%)	50/58 (86%)	MTOR,MAPK1,PIK3CG,MAPK3,RPS6KA3,PIK3CD,PIK3R4,ATM
HMGB1 Signaling	2.89E00	1.01E-01	NaN	0/109 (0%)	11/109 (10%)	0/109 (0%)	98/109 (90%)	MAPK1,HAT1,PIK3CG,MAPK3,RBBP7,PIK3CD,NFKB2,NFKB1,PIK3R4,FNBP1,ATM
Tight Junction Signaling	2.87E00	8.98E-02	NaN	0/167 (0%)	15/167 (9%)	0/167 (0%)	152/167 (91%)	CPSF2,TJP2,MYL6,PPP2CA,PPP2R2A,ACTB,CPSF1,SYMPK,NFKB2,NFKB1,PPP2R1A,MYH9,CPSF3,STX4,PPP2R1B
Role of IL-17A in Arthritis	2.86E00	1.25E-01	NaN	0/64 (0%)	8/64 (13%)	0/64 (0%)	56/64 (88%)	MAPK1,PIK3CG,MAPK3,PIK3CD,NFKB2,NFKB1,PIK3R4,ATM
JAK/Stat Signaling	2.85E00	1.27E-01	NaN	0/71 (0%)	9/71 (13%)	0/71 (0%)	62/71 (87%)	MTOR,MAPK1,GRB2,PIK3CG,MAPK3,PIK3CD,STAT5B,PIK3R4,ATM
Fc Epsilon RI Signaling	2.83E00	1.03E-01	NaN	0/117 (0%)	12/117 (10%)	0/117 (0%)	105/117 (90%)	BTK,MAPK1,GRB2,INPP5B,PLCG2,PIK3CG,SYK,MAPK3,VAV1,PIK3CD,PIK3R4,ATM
Renin-Angiotensin Signaling	2.83E00	9.52E-02	NaN	0/126 (0%)	12/126 (10%)	0/126 (0%)	114/126 (90%)	MAPK1,PTK2B,GRB2,PLCG2,PIK3CG,MAPK3,MAP3K1,PIK3CD,NFKB2,NFKB1,PIK3R4,ATM
Role of NFAT in Regulation of the Immune Response	2.81E00	8E-02	NaN	0/200 (0%)	16/200 (8%)	0/200 (0%)	184/200 (92%)	MAPK1,GRB2,GNB2L1,NFKB2,PIK3R4,NFKB1,BTK,PLCG2,PIK3CG,SYK,MAPK3,GNB2,XPO1,IKBKAP,PIK3CD,ATM
Spliceosomal Cycle	2.79E00	2.22E-01	NaN	0/9 (0%)	2/9 (22%)	0/9 (0%)	7/9 (78%)	U2AF2,U2AF1
Gap Junction Signaling	2.78E00	8.29E-02	NaN	0/181 (0%)	15/181 (8%)	0/181 (0%)	166/181 (92%)	TUBB3,MAPK1,GRB2,TUBB4B,ACTB,TUBA4A,TUBB,PIK3R4,TUBA1B,PLCG2,PIK3CG,MAPK3,TUBB4A,PIK3CD,ATM
Growth Hormone Signaling	2.75E00	1.15E-01	NaN	0/78 (0%)	9/78 (12%)	0/78 (0%)	69/78 (88%)	MAPK1,PLCG2,PIK3CG,MAPK3,RPS6KA3,PIK3CD,STAT5B,PIK3R4,ATM
Regulation of Actin-based Motility by Rho	2.74E00	1.09E-01	NaN	0/92 (0%)	10/92 (11%)	0/92 (0%)	82/92 (89%)	ACTR2,ACTR3,ARPC1B,MYL6,ARPC2,ACTB,ARPC5,ARPC3,FNBP1,ARPC4
DNA Double-Strand Break Repair by Non-Homologous End Joining	2.72E00	2E-01	NaN	0/20 (0%)	4/20 (20%)	0/20 (0%)	16/20 (80%)	PRKDC,XRCC6,XRCC5,ATM
Renal Cell Carcinoma Signaling	2.71E00	1.14E-01	NaN	0/79 (0%)	9/79 (11%)	0/79 (0%)	70/79 (89%)	ETS1,MAPK1,GRB2,CUL2,PIK3CG,MAPK3,PIK3CD,PIK3R4,ATM
ErbB2-ErbB3 Signaling	2.71E00	1.27E-01	NaN	0/63 (0%)	8/63 (13%)	0/63 (0%)	55/63 (87%)	MAPK1,GRB2,PIK3CG,MAPK3,PIK3CD,STAT5B,PIK3R4,ATM
CREB Signaling in Neurons	2.7E00	7.73E-02	NaN	0/207 (0%)	16/207 (8%)	0/207 (0%)	191/207 (92%)	POLR2A,POLR2C,CAMK2D,MAPK1,POLR2E,GRB2,MAPK3,PIK3CG,PLCG2,GNB2L1,GNB2,POLR2H,PIK3CD,POLR2B,PIK3R4,ATM
IL-3 Signaling	2.67E00	1.2E-01	NaN	0/75 (0%)	9/75 (12%)	0/75 (0%)	66/75 (88%)	MAPK1,GRB2,CRKL,PIK3CG,MAPK3,PIK3CD,STAT5B,PIK3R4,ATM
Glycolysis I	2.62E00	1.22E-01	NaN	0/41 (0%)	5/41 (12%)	0/41 (0%)	36/41 (88%)	PKM,GAPDH,PFKP,PFKL,PFKM
eNOS Signaling	2.6E00	8.39E-02	NaN	0/155 (0%)	13/155 (8%)	0/155 (0%)	142/155 (92%)	HSPA8,HSPA4,HSP90B1,HSP90AB1,PLCG2,PIK3CG,HSPA9,HSP90AA1,PIK3CD,HSPA5,PIK3R4,DNM2,ATM
Production of Nitric Oxide and Reactive Oxygen Species in Macrophages	2.6E00	7.55E-02	NaN	0/212 (0%)	16/212 (8%)	0/212 (0%)	196/212 (92%)	RAP1B,PPP2R1A,MAPK1,PPP2R2A,PPP2CA,MAPK3,PIK3CG,PLCG2,MAP3K1,PIK3CD,NFKB2,NFKB1,PIK3R4,PPP2R1B,FNBP1,ATM
Telomere Extension by Telomerase	2.6E00	2.22E-01	NaN	0/18 (0%)	4/18 (22%)	0/18 (0%)	14/18 (78%)	HNRNPA1,XRCC6,HNRNPA2B1,XRCC5
IL-6 Signaling	2.6E00	9.68E-02	NaN	0/124 (0%)	12/124 (10%)	0/124 (0%)	112/124 (90%)	MAPK1,GRB2,PIK3CG,MAPK3,CSNK2A1,PIK3CD,CSNK2B,NFKB2,NFKB1,PIK3R4,HSPB1,ATM
Prolactin Signaling	2.58E00	1.07E-01	NaN	0/84 (0%)	9/84 (11%)	0/84 (0%)	75/84 (89%)	MAPK1,GRB2,PLCG2,PIK3CG,MAPK3,PIK3CD,STAT5B,PIK3R4,ATM
FAK Signaling	2.58E00	9.43E-02	NaN	0/106 (0%)	10/106 (9%)	0/106 (0%)	96/106 (91%)	MAPK1,GRB2,PLCG2,PIK3CG,MAPK3,ACTB,TLN1,PIK3CD,PIK3R4,ATM
RANK Signaling in Osteoclasts	2.58E00	1.03E-01	NaN	0/97 (0%)	10/97 (10%)	0/97 (0%)	87/97 (90%)	MAPK1,PTK2B,PIK3CG,MAPK3,MAP3K1,PIK3CD,NFKB2,NFKB1,PIK3R4,ATM
Gαq Signaling	2.57E00	8.19E-02	NaN	0/171 (0%)	14/171 (8%)	0/171 (0%)	157/171 (92%)	BTK,MAPK1,PTK2B,MAPK3,PIK3CG,PLCG2,GNB2L1,GNB2,PIK3CD,NFKB2,PIK3R4,NFKB1,FNBP1,ATM
ATM Signaling	2.57E00	1.21E-01	NaN	0/66 (0%)	8/66 (12%)	0/66 (0%)	58/66 (88%)	SMC3,BRAT1,SMC2,FANCD2,TRIM28,CDK1,ATM,SMC1A
ErbB4 Signaling	2.57E00	1.16E-01	NaN	0/69 (0%)	8/69 (12%)	0/69 (0%)	61/69 (88%)	MAPK1,GRB2,PLCG2,PIK3CG,MAPK3,PIK3CD,PIK3R4,ATM
Neuregulin Signaling	2.54E00	9.62E-02	NaN	0/104 (0%)	10/104 (10%)	0/104 (0%)	94/104 (90%)	MTOR,HSP90B1,MAPK1,HSP90AB1,GRB2,PLCG2,CRKL,MAPK3,HSP90AA1,STAT5B
Methionine Degradation I (to Homocysteine)	2.49E00	1.67E-01	NaN	0/24 (0%)	4/24 (17%)	0/24 (0%)	20/24 (83%)	PRMT5,MAT2A,PRMT1,AHCY
Xenobiotic Metabolism Signaling	2.47E00	7.29E-02	NaN	0/288 (0%)	21/288 (7%)	0/288 (0%)	267/288 (93%)	FTL,MAPK1,PPP2CA,PPP2R2A,MAP3K1,NFKB2,PIK3R4,NFKB1,AIP,CUL3,PPP2R1A,HSP90B1,CAMK2D,HSP90AB1,PIK3CG,MAPK3,HSP90AA1,PIK3CD,PPP2R1B,GSTP1,ATM
IL-17A Signaling in Airway Cells	2.39E00	1.05E-01	NaN	0/76 (0%)	8/76 (11%)	0/76 (0%)	68/76 (89%)	MAPK1,PIK3CG,MAPK3,PIK3CD,NFKB2,NFKB1,PIK3R4,ATM
Non-Small Cell Lung Cancer Signaling	2.35E00	9.64E-02	NaN	0/83 (0%)	8/83 (10%)	0/83 (0%)	75/83 (90%)	STK4,MAPK1,GRB2,PIK3CG,MAPK3,PIK3CD,PIK3R4,ATM
Cardiac Hypertrophy Signaling	2.34E00	7.2E-02	NaN	0/250 (0%)	18/250 (7%)	0/250 (0%)	232/250 (93%)	MYL6,MAPK1,GRB2,MAP3K1,GNB2L1,PIK3R4,EIF2B2,MTOR,MAPK3,PLCG2,PIK3CG,EIF2B1,GNB2,EIF2B5,PIK3CD,FNBP1,ATM,HSPB1
PPAR Signaling	2.34E00	9.35E-02	NaN	0/107 (0%)	10/107 (9%)	0/107 (0%)	97/107 (91%)	HSP90B1,MAPK1,HSP90AB1,GRB2,MAPK3,HSP90AA1,NFKB2,STAT5B,NFKB1,AIP
Diphthamide Biosynthesis	2.32E00	1.54E-01	NaN	0/13 (0%)	2/13 (15%)	0/13 (0%)	11/13 (85%)	EEF2,DPH5
PRPP Biosynthesis I	2.32E00	2.86E-01	NaN	0/7 (0%)	2/7 (29%)	0/7 (0%)	5/7 (71%)	PRPS2,PRPS1
Natural Killer Cell Signaling	2.31E00	9.32E-02	NaN	0/118 (0%)	11/118 (9%)	0/118 (0%)	107/118 (91%)	MAPK1,GRB2,INPP5B,PLCG2,PIK3CG,SYK,MAPK3,VAV1,PIK3CD,PIK3R4,ATM
Ephrin Receptor Signaling	2.3E00	7.14E-02	NaN	0/210 (0%)	15/210 (7%)	0/210 (0%)	195/210 (93%)	RAP1B,ACTR2,ACTR3,ARPC1B,MAPK1,GRB2,PIK3CG,ARPC2,MAPK3,CRKL,GNB2L1,ARPC5,GNB2,ARPC3,ARPC4
Glioma Signaling	2.3E00	8.85E-02	NaN	0/113 (0%)	10/113 (9%)	0/113 (0%)	103/113 (91%)	MTOR,CAMK2D,MAPK1,GRB2,PLCG2,PIK3CG,MAPK3,PIK3CD,PIK3R4,ATM
Cysteine Biosynthesis III (mammalia)	2.29E00	1.29E-01	NaN	0/31 (0%)	4/31 (13%)	0/31 (0%)	27/31 (87%)	PRMT5,MAT2A,PRMT1,AHCY
Role of Tissue Factor in Cancer	2.28E00	8.46E-02	NaN	0/130 (0%)	11/130 (8%)	0/130 (0%)	119/130 (92%)	MTOR,P4HB,MAPK1,PTK2B,PIK3CG,MAPK3,RPS6KA3,PIK3CD,STAT5B,PIK3R4,ATM
Role of Pattern Recognition Receptors in Recognition of Bacteria and Viruses	2.27E00	9.17E-02	NaN	0/109 (0%)	10/109 (9%)	0/109 (0%)	99/109 (91%)	MAPK1,PLCG2,PIK3CG,SYK,MAPK3,PIK3CD,NFKB2,NFKB1,PIK3R4,ATM
GDNF Family Ligand-Receptor Interactions	2.23E00	1.05E-01	NaN	0/76 (0%)	8/76 (11%)	0/76 (0%)	68/76 (89%)	MAPK1,GRB2,PLCG2,PIK3CG,MAPK3,PIK3CD,PIK3R4,ATM
Melanoma Signaling	2.19E00	1.2E-01	NaN	0/50 (0%)	6/50 (12%)	0/50 (0%)	44/50 (88%)	MAPK1,PIK3CG,MAPK3,PIK3CD,PIK3R4,ATM
Role of p14/p19ARF in Tumor Suppression	2.19E00	1.43E-01	NaN	0/35 (0%)	5/35 (14%)	0/35 (0%)	30/35 (86%)	PIK3CG,SF3A1,PIK3CD,PIK3R4,ATM
TR/RXR Activation	2.14E00	8.26E-02	NaN	0/109 (0%)	9/109 (8%)	0/109 (0%)	100/109 (92%)	MTOR,PIK3CG,FASN,ACACA,PIK3CD,PFKP,TBL1XR1,PIK3R4,ATM
ErbB Signaling	2.14E00	1E-01	NaN	0/90 (0%)	9/90 (10%)	0/90 (0%)	81/90 (90%)	MTOR,MAPK1,GRB2,PLCG2,PIK3CG,MAPK3,PIK3CD,PIK3R4,ATM
Type II Diabetes Mellitus Signaling	2.14E00	6.43E-02	NaN	0/171 (0%)	11/171 (6%)	0/171 (0%)	160/171 (94%)	MTOR,MAPK1,PIK3CG,MAPK3,PKM,MAP3K1,PIK3CD,NFKB2,NFKB1,PIK3R4,ATM
4-1BB Signaling in T Lymphocytes	2.12E00	1.39E-01	NaN	0/36 (0%)	5/36 (14%)	0/36 (0%)	31/36 (86%)	MAPK1,MAPK3,IKBKAP,NFKB2,NFKB1
Superpathway of Methionine Degradation	2.12E00	7.69E-02	NaN	0/65 (0%)	5/65 (8%)	0/65 (0%)	60/65 (92%)	PRMT5,DLD,MAT2A,PRMT1,AHCY
Ovarian Cancer Signaling	2.12E00	7.89E-02	NaN	0/152 (0%)	12/152 (8%)	0/152 (0%)	140/152 (92%)	MTOR,PMS2,MSH2,MAPK1,PIK3CG,MAPK3,MSH6,PIK3CD,PIK3R4,MLH1,APC,ATM
PEDF Signaling	2.11E00	1.01E-01	NaN	0/79 (0%)	8/79 (10%)	0/79 (0%)	71/79 (90%)	MAPK1,PIK3CG,MAPK3,PIK3CD,NFKB2,NFKB1,PIK3R4,ATM
PTEN Signaling	2.11E00	7.97E-02	NaN	0/138 (0%)	11/138 (8%)	0/138 (0%)	127/138 (92%)	MAPK1,YWHAH,GRB2,INPP5B,PIK3CG,MAPK3,CSNK2A1,PIK3CD,CSNK2B,NFKB2,NFKB1
Melanocyte Development and Pigmentation Signaling	2.11E00	9.47E-02	NaN	0/95 (0%)	9/95 (9%)	0/95 (0%)	86/95 (91%)	MAPK1,GRB2,PLCG2,PIK3CG,MAPK3,RPS6KA3,PIK3CD,PIK3R4,ATM
FGF Signaling	2.11E00	9.57E-02	NaN	0/94 (0%)	9/94 (10%)	0/94 (0%)	85/94 (90%)	MAPK1,GRB2,CRKL,PIK3CG,MAPK3,MAP3K1,PIK3CD,PIK3R4,ATM
Glioma Invasiveness Signaling	2.07E00	1.06E-01	NaN	0/66 (0%)	7/66 (11%)	0/66 (0%)	59/66 (89%)	MAPK1,PIK3CG,MAPK3,PIK3CD,PIK3R4,FNBP1,ATM
HIF1α Signaling	2.06E00	8.93E-02	NaN	0/112 (0%)	10/112 (9%)	0/112 (0%)	102/112 (91%)	MAPK1,CUL2,PIK3CG,MAPK3,HSP90AA1,PIK3CD,PIK3R4,LDHA,LDHB,ATM
IL-8 Signaling	2.05E00	6.67E-02	NaN	0/225 (0%)	15/225 (7%)	0/225 (0%)	210/225 (93%)	PTK2B,MAPK1,GNB2L1,BAX,IQGAP1,NFKB1,PIK3R4,MTOR,PIK3CG,MAPK3,GNB2,PIK3CD,LASP1,FNBP1,ATM
PAK Signaling	2.04E00	8.18E-02	NaN	0/110 (0%)	9/110 (8%)	0/110 (0%)	101/110 (92%)	MAPK1,MYL6,PTK2B,GRB2,PIK3CG,MAPK3,PIK3CD,PIK3R4,ATM
Apoptosis Signaling	2.04E00	9E-02	NaN	0/100 (0%)	9/100 (9%)	0/100 (0%)	91/100 (91%)	MAPK1,PLCG2,MAPK3,BAX,NFKB2,NFKB1,DIABLO,CDK1,DFFA
LPS-stimulated MAPK Signaling	2.04E00	9.64E-02	NaN	0/83 (0%)	8/83 (10%)	0/83 (0%)	75/83 (90%)	MAPK1,PIK3CG,MAPK3,PIK3CD,NFKB2,NFKB1,PIK3R4,ATM
2-ketoglutarate Dehydrogenase Complex	2.03E00	2.22E-01	NaN	0/9 (0%)	2/9 (22%)	0/9 (0%)	7/9 (78%)	DHTKD1,DLD
TREM1 Signaling	2.03E00	9.33E-02	NaN	0/75 (0%)	7/75 (9%)	0/75 (0%)	68/75 (91%)	MAPK1,GRB2,PLCG2,MAPK3,NFKB2,STAT5B,NFKB1
Relaxin Signaling	2.02E00	7.32E-02	NaN	0/164 (0%)	12/164 (7%)	0/164 (0%)	152/164 (93%)	RAP1B,MAPK1,PDE12,PIK3CG,MAPK3,GNB2L1,GNB2,PIK3CD,NFKB2,NFKB1,PIK3R4,ATM
Virus Entry via Endocytic Pathways	2.01E00	8.91E-02	NaN	0/101 (0%)	9/101 (9%)	0/101 (0%)	92/101 (91%)	PLCG2,PIK3CG,ACTB,CLTC,TFRC,PIK3CD,PIK3R4,DNM2,ATM
G Beta Gamma Signaling	2.01E00	7.44E-02	NaN	0/121 (0%)	9/121 (7%)	0/121 (0%)	112/121 (93%)	BTK,MAPK1,GRB2,PLCG2,PIK3CG,MAPK3,GNB2L1,GNB2,DNM2
Caveolar-mediated Endocytosis Signaling	2.01E00	9.41E-02	NaN	0/85 (0%)	8/85 (9%)	0/85 (0%)	77/85 (91%)	ARCN1,ACTB,COPA,COPE,COPB2,COPB1,DNM2,COPG1
Axonal Guidance Signaling	2E00	5.75E-02	NaN	0/487 (0%)	28/487 (6%)	0/487 (0%)	459/487 (94%)	RAP1B,ARPC1B,MAPK1,MYL6,GNB2L1,ARPC5,TUBB,BRCC3,PIK3R4,ACTR3,MAPK3,PIK3CG,ARPC3,PSMD14,TUBB4A,ATM,ACTR2,TUBB3,GRB2,TUBB4B,CRKL,TUBA4A,TUBA1B,ARPC2,PLCG2,GNB2,PIK3CD,ARPC4
P2Y Purigenic Receptor Signaling Pathway	1.98E00	7.64E-02	NaN	0/144 (0%)	11/144 (8%)	0/144 (0%)	133/144 (92%)	MAPK1,PLCG2,PIK3CG,MAPK3,GNB2L1,GNB2,PIK3CD,NFKB2,NFKB1,PIK3R4,ATM
Leptin Signaling in Obesity	1.98E00	9.41E-02	NaN	0/85 (0%)	8/85 (9%)	0/85 (0%)	77/85 (91%)	MAPK1,GRB2,PLCG2,PIK3CG,MAPK3,PIK3CD,PIK3R4,ATM
Polyamine Regulation in Colon Cancer	1.97E00	1.33E-01	NaN	0/30 (0%)	4/30 (13%)	0/30 (0%)	26/30 (87%)	PSME1,PSME2,PSME3,APC
Thrombin Signaling	1.97E00	7.11E-02	NaN	0/211 (0%)	15/211 (7%)	0/211 (0%)	196/211 (93%)	CAMK2D,MAPK1,MYL6,GRB2,MAPK3,PIK3CG,PLCG2,GNB2L1,GNB2,PIK3CD,NFKB2,PIK3R4,NFKB1,FNBP1,ATM
Cleavage and Polyadenylation of Pre-mRNA	1.96E00	2.31E-01	NaN	0/13 (0%)	3/13 (23%)	0/13 (0%)	10/13 (77%)	CPSF2,CPSF1,CPSF3
UVA-Induced MAPK Signaling	1.95E00	9.18E-02	NaN	0/98 (0%)	9/98 (9%)	0/98 (0%)	89/98 (91%)	MTOR,MAPK1,PLCG2,PIK3CG,MAPK3,RPS6KA3,PIK3CD,PIK3R4,ATM
VEGF Family Ligand-Receptor Interactions	1.94E00	9.09E-02	NaN	0/88 (0%)	8/88 (9%)	0/88 (0%)	80/88 (91%)	MAPK1,GRB2,PLCG2,PIK3CG,MAPK3,PIK3CD,PIK3R4,ATM
Cell Cycle Regulation by BTG Family Proteins	1.9E00	1.28E-01	NaN	0/39 (0%)	5/39 (13%)	0/39 (0%)	34/39 (87%)	PPP2R1A,PPP2CA,PPP2R2A,PPP2R1B,PRMT1
Regulation of IL-2 Expression in Activated and Anergic T Lymphocytes	1.85E00	8.99E-02	NaN	0/89 (0%)	8/89 (9%)	0/89 (0%)	81/89 (91%)	MAPK1,GRB2,PLCG2,MAPK3,MAP3K1,VAV1,NFKB2,NFKB1
ERK5 Signaling	1.84E00	1.03E-01	NaN	0/68 (0%)	7/68 (10%)	0/68 (0%)	61/68 (90%)	YWHAQ,YWHAG,YWHAE,YWHAH,YWHAB,YWHAZ,RPS6KA3
PI3K Signaling in B Lymphocytes	1.84E00	7.69E-02	NaN	0/143 (0%)	11/143 (8%)	0/143 (0%)	132/143 (92%)	BTK,CAMK2D,MAPK1,PLCG2,PIK3CG,SYK,MAPK3,VAV1,PIK3CD,NFKB2,NFKB1
Pyrimidine Deoxyribonucleotides De Novo Biosynthesis I	1.83E00	9.09E-02	NaN	0/44 (0%)	4/44 (9%)	0/44 (0%)	40/44 (91%)	TYMS,DUT,NME1,RRM2
Pyruvate Fermentation to Lactate	1.82E00	2.22E-01	NaN	0/9 (0%)	2/9 (22%)	0/9 (0%)	7/9 (78%)	LDHA,LDHB
Tetrahydrofolate Salvage from 5,10-methenyltetrahydrofolate	1.82E00	2E-01	NaN	0/10 (0%)	2/10 (20%)	0/10 (0%)	8/10 (80%)	MTHFD1,GART
Cyclins and Cell Cycle Regulation	1.82E00	8.33E-02	NaN	0/96 (0%)	8/96 (8%)	0/96 (0%)	88/96 (92%)	HDAC6,PPP2R1A,PPP2CA,PPP2R2A,SKP1,PPP2R1B,CDK1,ATM
DNA Double-Strand Break Repair by Homologous Recombination	1.77E00	1.67E-01	NaN	0/18 (0%)	3/18 (17%)	0/18 (0%)	15/18 (83%)	POLA1,RPA1,ATM
Colanic Acid Building Blocks Biosynthesis	1.77E00	8.33E-02	NaN	0/36 (0%)	3/36 (8%)	0/36 (0%)	33/36 (92%)	GMPPB,GMDS,GALK1
p53 Signaling	1.76E00	7.96E-02	NaN	0/113 (0%)	9/113 (8%)	0/113 (0%)	104/113 (92%)	PRKDC,PCNA,PIK3CG,SIRT1,PIK3CD,BAX,ST13,PIK3R4,ATM
Colorectal Cancer Metastasis Signaling	1.71E00	6.34E-02	NaN	0/268 (0%)	17/268 (6%)	0/268 (0%)	251/268 (94%)	MAPK1,GRB2,GNB2L1,BAX,NFKB2,PIK3R4,NFKB1,MLH1,APC,MSH2,MAPK3,PIK3CG,GNB2,MSH6,PIK3CD,FNBP1,ATM
Neurotrophin/TRK Signaling	1.71E00	9.21E-02	NaN	0/76 (0%)	7/76 (9%)	0/76 (0%)	69/76 (91%)	MAPK1,GRB2,PIK3CG,MAPK3,PIK3CD,PIK3R4,ATM
Macropinocytosis Signaling	1.71E00	9.09E-02	NaN	0/77 (0%)	7/77 (9%)	0/77 (0%)	70/77 (91%)	PLCG2,PIK3CG,ANKFY1,PIK3CD,ACTN4,PIK3R4,ATM
Docosahexaenoic Acid (DHA) Signaling	1.71E00	1E-01	NaN	0/50 (0%)	5/50 (10%)	0/50 (0%)	45/50 (90%)	PIK3CG,PIK3CD,BAX,PIK3R4,ATM
Isoleucine Degradation I	1.68E00	1E-01	NaN	0/30 (0%)	3/30 (10%)	0/30 (0%)	27/30 (90%)	HSD17B10,ECHS1,DLD
Nitric Oxide Signaling in the Cardiovascular System	1.68E00	7.2E-02	NaN	0/125 (0%)	9/125 (7%)	0/125 (0%)	116/125 (93%)	HSP90B1,MAPK1,HSP90AB1,PIK3CG,MAPK3,HSP90AA1,PIK3CD,PIK3R4,ATM
RhoA Signaling	1.67E00	8.13E-02	NaN	0/123 (0%)	10/123 (8%)	0/123 (0%)	113/123 (92%)	ACTR2,ACTR3,ARPC1B,MYL6,PTK2B,ARPC2,ACTB,ARPC5,ARPC3,ARPC4
B Cell Activating Factor Signaling	1.66E00	1.09E-01	NaN	0/46 (0%)	5/46 (11%)	0/46 (0%)	41/46 (89%)	MAPK1,MAP3K1,IKBKAP,NFKB2,NFKB1
Selenocysteine Biosynthesis II (Archaea and Eukaryotes)	1.66E00	1.18E-01	NaN	0/17 (0%)	2/17 (12%)	0/17 (0%)	15/17 (88%)	SEPHS1,SARS
RhoGDI Signaling	1.61E00	6.44E-02	NaN	0/202 (0%)	13/202 (6%)	0/202 (0%)	189/202 (94%)	ACTR2,ARPC1B,MYL6,ACTB,ARPC5,GNB2L1,ACTR3,ARPC2,GNB2,ARPC3,ARHGEF18,ARPC4,FNBP1
IL-17 Signaling	1.59E00	9.33E-02	NaN	0/75 (0%)	7/75 (9%)	0/75 (0%)	68/75 (91%)	MAPK1,PIK3CG,MAPK3,PIK3CD,NFKB1,PIK3R4,ATM
Regulation of Cellular Mechanics by Calpain Protease	1.57E00	8.22E-02	NaN	0/73 (0%)	6/73 (8%)	0/73 (0%)	67/73 (92%)	MAPK1,GRB2,MAPK3,TLN1,ACTN4,CDK1
PPARα/RXRα Activation	1.56E00	6.5E-02	NaN	0/200 (0%)	13/200 (7%)	0/200 (0%)	187/200 (94%)	MAPK1,GRB2,NFKB2,NFKB1,AIP,CAND1,HSP90B1,HSP90AB1,PLCG2,FASN,MAPK3,HSP90AA1,STAT5B
RAR Activation	1.56E00	6.67E-02	NaN	0/195 (0%)	13/195 (7%)	0/195 (0%)	182/195 (93%)	RPL7A,MAPK1,PIK3CG,MAP3K1,CSNK2A1,PIK3CD,CSNK2B,NFKB2,STAT5B,NFKB1,PSMC5,SMARCA4,PRMT1
Sertoli Cell-Sertoli Cell Junction Signaling	1.56E00	6.57E-02	NaN	0/198 (0%)	13/198 (7%)	0/198 (0%)	185/198 (93%)	TUBB3,TJP2,MAPK1,TUBB4B,MAPK3,ACTB,MAP3K1,TUBA4A,SYMPK,TUBB4A,ACTN4,TUBB,TUBA1B
Phospholipase C Signaling	1.55E00	6.04E-02	NaN	0/265 (0%)	16/265 (6%)	0/265 (0%)	249/265 (94%)	RAP1B,MYL6,MAPK1,GRB2,GNB2L1,RPS6KA3,NFKB2,NFKB1,HDAC6,BTK,MAPK3,PLCG2,SYK,GNB2,ARHGEF18,FNBP1
iCOS-iCOSL Signaling in T Helper Cells	1.54E00	7.14E-02	NaN	0/126 (0%)	9/126 (7%)	0/126 (0%)	117/126 (93%)	CAMK2D,GRB2,PIK3CG,VAV1,PIK3CD,NFKB2,NFKB1,PIK3R4,ATM
Pancreatic Adenocarcinoma Signaling	1.54E00	7.03E-02	NaN	0/128 (0%)	9/128 (7%)	0/128 (0%)	119/128 (93%)	MAPK1,GRB2,PIK3CG,MAPK3,PIK3CD,NFKB2,NFKB1,PIK3R4,ATM
IL-4 Signaling	1.53E00	8.75E-02	NaN	0/80 (0%)	7/80 (9%)	0/80 (0%)	73/80 (91%)	MTOR,GRB2,INPP5B,PIK3CG,PIK3CD,PIK3R4,ATM
Leukocyte Extravasation Signaling	1.52E00	6.67E-02	NaN	0/210 (0%)	14/210 (7%)	0/210 (0%)	196/210 (93%)	BTK,RAP1B,PTK2B,MYL6,MAPK1,PIK3CG,PLCG2,ACTB,CRKL,VAV1,PIK3CD,ACTN4,PIK3R4,ATM
Cdc42 Signaling	1.52E00	6.45E-02	NaN	0/186 (0%)	12/186 (6%)	0/186 (0%)	174/186 (94%)	ACTR2,ACTR3,ARPC1B,MAPK1,MYL6,ARPC2,ARPC5,ARPC3,VAV1,IQGAP1,APC,ARPC4
Induction of Apoptosis by HIV1	1.51E00	8.96E-02	NaN	0/67 (0%)	6/67 (9%)	0/67 (0%)	61/67 (91%)	IKBKAP,BAX,NFKB2,NFKB1,DIABLO,DFFA
Pyrimidine Ribonucleotides De Novo Biosynthesis	1.5E00	7.41E-02	NaN	0/54 (0%)	4/54 (7%)	0/54 (0%)	50/54 (93%)	NUDT5,NME1,CAD,CTPS1
Role of NFAT in Cardiac Hypertrophy	1.48E00	6.22E-02	NaN	0/209 (0%)	13/209 (6%)	0/209 (0%)	196/209 (94%)	HDAC6,CAMK2D,MAPK1,GRB2,PLCG2,PIK3CG,MAPK3,GNB2L1,MAP3K1,GNB2,PIK3CD,PIK3R4,ATM
Sphingosine-1-phosphate Signaling	1.47E00	7.32E-02	NaN	0/123 (0%)	9/123 (7%)	0/123 (0%)	114/123 (93%)	MAPK1,PTK2B,PLCG2,PIK3CG,MAPK3,PIK3CD,PIK3R4,FNBP1,ATM
MSP-RON Signaling Pathway	1.47E00	9.8E-02	NaN	0/51 (0%)	5/51 (10%)	0/51 (0%)	46/51 (90%)	PIK3CG,ACTB,PIK3CD,PIK3R4,ATM
Role of IL-17F in Allergic Inflammatory Airway Diseases	1.47E00	1.04E-01	NaN	0/48 (0%)	5/48 (10%)	0/48 (0%)	43/48 (90%)	MAPK1,MAPK3,RPS6KA3,NFKB2,NFKB1
Glioblastoma Multiforme Signaling	1.44E00	6.55E-02	NaN	0/168 (0%)	11/168 (7%)	0/168 (0%)	157/168 (93%)	MTOR,MAPK1,GRB2,PLCG2,PIK3CG,MAPK3,PIK3CD,PIK3R4,FNBP1,APC,ATM
Mouse Embryonic Stem Cell Pluripotency	1.42E00	8.08E-02	NaN	0/99 (0%)	8/99 (8%)	0/99 (0%)	91/99 (92%)	MAPK1,GRB2,PIK3CG,MAPK3,PIK3CD,PIK3R4,APC,ATM
SAPK/JNK Signaling	1.42E00	7.62E-02	NaN	0/105 (0%)	8/105 (8%)	0/105 (0%)	97/105 (92%)	GRB2,CRKL,PIK3CG,MAP3K1,PIK3CD,PIK3R4,HNRNPK,ATM
Granzyme A Signaling	1.41E00	1.5E-01	NaN	0/20 (0%)	3/20 (15%)	0/20 (0%)	17/20 (85%)	NME1,SET,ANP32A
Acetyl-CoA Biosynthesis III (from Citrate)	1.39E00	1.25E-01	NaN	0/8 (0%)	1/8 (13%)	0/8 (0%)	7/8 (88%)	ACLY
Asparagine Biosynthesis I	1.39E00	1.25E-01	NaN	0/8 (0%)	1/8 (13%)	0/8 (0%)	7/8 (88%)	ASNS
MIF-mediated Glucocorticoid Regulation	1.37E00	9.52E-02	NaN	0/42 (0%)	4/42 (10%)	0/42 (0%)	38/42 (90%)	MAPK1,MAPK3,NFKB2,NFKB1
Ephrin A Signaling	1.36E00	9.26E-02	NaN	0/54 (0%)	5/54 (9%)	0/54 (0%)	49/54 (91%)	PIK3CG,VAV1,PIK3CD,PIK3R4,ATM
GADD45 Signaling	1.35E00	1.25E-01	NaN	0/24 (0%)	3/24 (13%)	0/24 (0%)	21/24 (88%)	PCNA,CDK1,ATM
CXCR4 Signaling	1.34E00	6.32E-02	NaN	0/174 (0%)	11/174 (6%)	0/174 (0%)	163/174 (94%)	MAPK1,MYL6,PIK3CG,MAPK3,GNB2L1,GNB2,PIK3CD,PIK3R4,ELMO1,FNBP1,ATM
Oncostatin M Signaling	1.33E00	1.14E-01	NaN	0/35 (0%)	4/35 (11%)	0/35 (0%)	31/35 (89%)	MAPK1,GRB2,MAPK3,STAT5B
Neuropathic Pain Signaling In Dorsal Horn Neurons	1.31E00	7.34E-02	NaN	0/109 (0%)	8/109 (7%)	0/109 (0%)	101/109 (93%)	CAMK2D,MAPK1,PLCG2,PIK3CG,MAPK3,PIK3CD,PIK3R4,ATM
Hypoxia Signaling in the Cardiovascular System	1.3E00	8.82E-02	NaN	0/68 (0%)	6/68 (9%)	0/68 (0%)	62/68 (91%)	P4HB,HSP90B1,HSP90AB1,HSP90AA1,LDHA,ATM
IL-17A Signaling in Fibroblasts	1.29E00	1E-01	NaN	0/40 (0%)	4/40 (10%)	0/40 (0%)	36/40 (90%)	MAPK1,MAPK3,NFKB2,NFKB1
TCA Cycle II (Eukaryotic)	1.24E00	7.5E-02	NaN	0/40 (0%)	3/40 (8%)	0/40 (0%)	37/40 (93%)	DHTKD1,DLD,IDH3A
Chemokine Signaling	1.22E00	8E-02	NaN	0/75 (0%)	6/75 (8%)	0/75 (0%)	69/75 (92%)	CAMK2D,MAPK1,PTK2B,PLCG2,PIK3CG,MAPK3
April Mediated Signaling	1.18E00	9.09E-02	NaN	0/44 (0%)	4/44 (9%)	0/44 (0%)	40/44 (91%)	MAPK1,MAP3K1,NFKB2,NFKB1
Small Cell Lung Cancer Signaling	1.18E00	6.38E-02	NaN	0/94 (0%)	6/94 (6%)	0/94 (0%)	88/94 (94%)	PIK3CG,PIK3CD,NFKB2,NFKB1,PIK3R4,ATM
IL-22 Signaling	1.15E00	1.2E-01	NaN	0/25 (0%)	3/25 (12%)	0/25 (0%)	22/25 (88%)	MAPK1,MAPK3,STAT5B
Tumoricidal Function of Hepatic Natural Killer Cells	1.15E00	1.11E-01	NaN	0/27 (0%)	3/27 (11%)	0/27 (0%)	24/27 (89%)	M6PR,BAX,DFFA
Mechanisms of Viral Exit from Host Cells	1.12E00	8.89E-02	NaN	0/45 (0%)	4/45 (9%)	0/45 (0%)	41/45 (91%)	VPS28,ACTB,XPO1,PDCD6IP
IL-17A Signaling in Gastric Cells	1.11E00	1.07E-01	NaN	0/28 (0%)	3/28 (11%)	0/28 (0%)	25/28 (89%)	MAPK1,MAPK3,NFKB1
Role of JAK family kinases in IL-6-type Cytokine Signaling	1.11E00	1.07E-01	NaN	0/28 (0%)	3/28 (11%)	0/28 (0%)	25/28 (89%)	MAPK1,MAPK3,STAT5B
Ephrin B Signaling	1.11E00	7.32E-02	NaN	0/82 (0%)	6/82 (7%)	0/82 (0%)	76/82 (93%)	MAPK1,MAPK3,GNB2L1,GNB2,VAV1,HNRNPK
S-methyl-5'-thioadenosine Degradation II	1.1E00	1.67E-01	NaN	0/6 (0%)	1/6 (17%)	0/6 (0%)	5/6 (83%)	MTAP
Palmitate Biosynthesis I (Animals)	1.1E00	2.7E-02	NaN	0/37 (0%)	1/37 (3%)	0/37 (0%)	36/37 (97%)	FASN
Uridine-5'-phosphate Biosynthesis	1.1E00	5E-02	NaN	0/20 (0%)	1/20 (5%)	0/20 (0%)	19/20 (95%)	CAD
Fatty Acid Biosynthesis Initiation II	1.1E00	1.43E-01	NaN	0/7 (0%)	1/7 (14%)	0/7 (0%)	6/7 (86%)	FASN
GDP-L-fucose Biosynthesis I (from GDP-D-mannose)	1.1E00	1.43E-01	NaN	0/7 (0%)	1/7 (14%)	0/7 (0%)	6/7 (86%)	GMDS
Glutamate Biosynthesis II	1.1E00	1.43E-01	NaN	0/7 (0%)	1/7 (14%)	0/7 (0%)	6/7 (86%)	GLUD1
Glutamate Degradation X	1.1E00	1.43E-01	NaN	0/7 (0%)	1/7 (14%)	0/7 (0%)	6/7 (86%)	GLUD1
GNRH Signaling	1.09E00	5.88E-02	NaN	0/153 (0%)	9/153 (6%)	0/153 (0%)	144/153 (94%)	CAMK2D,MAPK1,GRB2,MAPK3,MAP3K1,NFKB2,DNM1L,NFKB1,DNM2
Acute Phase Response Signaling	1.09E00	6.08E-02	NaN	0/181 (0%)	11/181 (6%)	0/181 (0%)	170/181 (94%)	MTOR,FTL,MAPK1,GRB2,PIK3CG,MAPK3,MAP3K1,PIK3CD,NFKB2,NFKB1,HNRNPK
Glutaryl-CoA Degradation	1.09E00	8.33E-02	NaN	0/24 (0%)	2/24 (8%)	0/24 (0%)	22/24 (92%)	HSD17B10,GCDH
MIF Regulation of Innate Immunity	1.08E00	7.69E-02	NaN	0/52 (0%)	4/52 (8%)	0/52 (0%)	48/52 (92%)	MAPK1,MAPK3,NFKB2,NFKB1
Role of NANOG in Mammalian Embryonic Stem Cell Pluripotency	1.08E00	6.72E-02	NaN	0/119 (0%)	8/119 (7%)	0/119 (0%)	111/119 (93%)	MAPK1,GRB2,PIK3CG,MAPK3,PIK3CD,PIK3R4,APC,ATM
Antiproliferative Role of TOB in T Cell Signaling	1.07E00	1.15E-01	NaN	0/26 (0%)	3/26 (12%)	0/26 (0%)	23/26 (88%)	PABPC1,MAPK1,SKP1
IL-12 Signaling and Production in Macrophages	1.03E00	5.73E-02	NaN	0/157 (0%)	9/157 (6%)	0/157 (0%)	148/157 (94%)	MAPK1,PIK3CG,MAPK3,RAB7A,PIK3CD,NFKB2,NFKB1,PIK3R4,ATM
IL-15 Production	1.03E00	9.68E-02	NaN	0/31 (0%)	3/31 (10%)	0/31 (0%)	28/31 (90%)	PTK2B,NFKB2,NFKB1
CCR3 Signaling in Eosinophils	1.03E00	5.97E-02	NaN	0/134 (0%)	8/134 (6%)	0/134 (0%)	126/134 (94%)	MAPK1,PIK3CG,MAPK3,GNB2L1,GNB2,PIK3CD,PIK3R4,ATM
Protein Kinase A Signaling	1.02E00	5.13E-02	NaN	0/409 (0%)	21/409 (5%)	0/409 (0%)	388/409 (95%)	RAP1B,YWHAG,YWHAH,PTK2B,MYL6,MAPK1,YWHAE,AKAP8,YWHAB,PDE12,GNB2L1,MAP3K1,YWHAZ,NFKB2,NFKB1,ANAPC1,YWHAQ,CAMK2D,PLCG2,MAPK3,GNB2
Antioxidant Action of Vitamin C	1.01E00	6.31E-02	NaN	0/111 (0%)	7/111 (6%)	0/111 (0%)	104/111 (94%)	MAPK1,PLCG2,MAPK3,NFKB2,STAT5B,NFKB1,PRDX6
Molecular Mechanisms of Cancer	9.98E-01	4.9E-02	NaN	0/388 (0%)	19/388 (5%)	0/388 (0%)	369/388 (95%)	RAP1B,PRKDC,MAPK1,GRB2,HAT1,BAX,NFKB2,PIK3R4,NFKB1,APC,CAMK2D,FANCD2,PIK3CG,MAPK3,ARHGEF18,PIK3CD,DIABLO,FNBP1,ATM
TNFR2 Signaling	9.92E-01	8.82E-02	NaN	0/34 (0%)	3/34 (9%)	0/34 (0%)	31/34 (91%)	MAP3K1,NFKB2,NFKB1
Pyrimidine Ribonucleotides Interconversion	9.92E-01	7.5E-02	NaN	0/40 (0%)	3/40 (8%)	0/40 (0%)	37/40 (93%)	NUDT5,NME1,CTPS1
Urate Biosynthesis/Inosine 5'-phosphate Degradation	9.68E-01	8.7E-02	NaN	0/23 (0%)	2/23 (9%)	0/23 (0%)	21/23 (91%)	IMPDH2,NT5C2
Regulation of the Epithelial-Mesenchymal Transition Pathway	9.35E-01	5.61E-02	NaN	0/196 (0%)	11/196 (6%)	0/196 (0%)	185/196 (94%)	ETS1,MAPK1,GRB2,PIK3CG,MAPK3,PIK3CD,NFKB2,NFKB1,PIK3R4,APC,ATM
NADH Repair	9.34E-01	1.11E-01	NaN	0/9 (0%)	1/9 (11%)	0/9 (0%)	8/9 (89%)	GAPDH
Hypusine Biosynthesis	9.34E-01	2E-01	NaN	0/5 (0%)	1/5 (20%)	0/5 (0%)	4/5 (80%)	DHPS
Spermidine Biosynthesis I	9.34E-01	1.25E-01	NaN	0/8 (0%)	1/8 (13%)	0/8 (0%)	7/8 (88%)	SRM
Oxidized GTP and dGTP Detoxification	9.34E-01	9.09E-02	NaN	0/11 (0%)	1/11 (9%)	0/11 (0%)	10/11 (91%)	RUVBL2
S-adenosyl-L-methionine Biosynthesis	9.34E-01	1.25E-01	NaN	0/8 (0%)	1/8 (13%)	0/8 (0%)	7/8 (88%)	MAT2A
Cell Cycle: G1/S Checkpoint Regulation	8.95E-01	6.94E-02	NaN	0/72 (0%)	5/72 (7%)	0/72 (0%)	67/72 (93%)	HDAC6,RPL11,RPL5,SKP1,ATM
Granzyme B Signaling	8.71E-01	1.11E-01	NaN	0/18 (0%)	2/18 (11%)	0/18 (0%)	16/18 (89%)	PRKDC,DFFA
CDK5 Signaling	8.39E-01	6.19E-02	NaN	0/97 (0%)	6/97 (6%)	0/97 (0%)	91/97 (94%)	PPP2R1A,MAPK1,PPP2CA,PPP2R2A,MAPK3,PPP2R1B
Superpathway of Inositol Phosphate Compounds	8.32E-01	4.7E-02	NaN	0/234 (0%)	11/234 (5%)	0/234 (0%)	223/234 (95%)	NUDT5,INPP5B,PLCG2,PIK3CG,SEC16A,PIK3CD,PALD1,PPP4R1,PIK3R4,SET,ATM
CD27 Signaling in Lymphocytes	8.25E-01	6.78E-02	NaN	0/59 (0%)	4/59 (7%)	0/59 (0%)	55/59 (93%)	MAP3K1,IKBKAP,NFKB2,NFKB1
Amyloid Processing	8.25E-01	6.56E-02	NaN	0/61 (0%)	4/61 (7%)	0/61 (0%)	57/61 (93%)	MAPK1,MAPK3,CSNK2A1,CSNK2B
Serine Biosynthesis	8.18E-01	7.69E-02	NaN	0/13 (0%)	1/13 (8%)	0/13 (0%)	12/13 (92%)	PHGDH
Branched-chain α-keto acid Dehydrogenase Complex	8.18E-01	1.11E-01	NaN	0/9 (0%)	1/9 (11%)	0/9 (0%)	8/9 (89%)	DLD
D-glucuronate Degradation I	8.18E-01	7.14E-02	NaN	0/14 (0%)	1/14 (7%)	0/14 (0%)	13/14 (93%)	DCXR
Biotin-carboxyl Carrier Protein Assembly	8.18E-01	6.67E-02	NaN	0/15 (0%)	1/15 (7%)	0/15 (0%)	14/15 (93%)	ACACA
CCR5 Signaling in Macrophages	8.18E-01	5.15E-02	NaN	0/97 (0%)	5/97 (5%)	0/97 (0%)	92/97 (95%)	MAPK1,PTK2B,PLCG2,GNB2L1,GNB2
G Protein Signaling Mediated by Tubby	8.05E-01	6.82E-02	NaN	0/44 (0%)	3/44 (7%)	0/44 (0%)	41/44 (93%)	PLCG2,GNB2L1,GNB2
NF-κB Signaling	7.89E-01	5.52E-02	NaN	0/181 (0%)	10/181 (6%)	0/181 (0%)	171/181 (94%)	PLCG2,PIK3CG,MAP3K1,CSNK2A1,PIK3CD,CSNK2B,NFKB2,NFKB1,PIK3R4,ATM
Valine Degradation I	7.88E-01	5.71E-02	NaN	0/35 (0%)	2/35 (6%)	0/35 (0%)	33/35 (94%)	ECHS1,DLD
D-myo-inositol (1,4,5)-trisphosphate Degradation	7.88E-01	8.7E-02	NaN	0/23 (0%)	2/23 (9%)	0/23 (0%)	21/23 (91%)	INPP5B,SEC16A
IL-1 Signaling	7.61E-01	5.5E-02	NaN	0/109 (0%)	6/109 (6%)	0/109 (0%)	103/109 (94%)	MAPK1,GNB2L1,MAP3K1,GNB2,NFKB2,NFKB1
1D-myo-inositol Hexakisphosphate Biosynthesis II (Mammalian)	7.51E-01	7.14E-02	NaN	0/28 (0%)	2/28 (7%)	0/28 (0%)	26/28 (93%)	INPP5B,SEC16A
D-myo-inositol (1,3,4)-trisphosphate Biosynthesis	7.51E-01	8E-02	NaN	0/25 (0%)	2/25 (8%)	0/25 (0%)	23/25 (92%)	INPP5B,SEC16A
DNA damage-induced 14-3-3σ Signaling	7.51E-01	9.09E-02	NaN	0/22 (0%)	2/22 (9%)	0/22 (0%)	20/22 (91%)	CDK1,ATM
Cardiac β-adrenergic Signaling	7.45E-01	5.06E-02	NaN	0/158 (0%)	8/158 (5%)	0/158 (0%)	150/158 (95%)	PPP2R1A,AKAP8,PPP2CA,PPP2R2A,PDE12,GNB2L1,GNB2,PPP2R1B
CMP-N-acetylneuraminate Biosynthesis I (Eukaryotes)	7.3E-01	5.56E-02	NaN	0/18 (0%)	1/18 (6%)	0/18 (0%)	17/18 (94%)	NAGK
2-oxobutanoate Degradation I	7.3E-01	5.88E-02	NaN	0/17 (0%)	1/17 (6%)	0/17 (0%)	16/17 (94%)	DLD
NAD Biosynthesis III	7.3E-01	9.09E-02	NaN	0/11 (0%)	1/11 (9%)	0/11 (0%)	10/11 (91%)	NAMPT
Galactose Degradation I (Leloir Pathway)	7.3E-01	6.25E-02	NaN	0/16 (0%)	1/16 (6%)	0/16 (0%)	15/16 (94%)	GALK1
dTMP De Novo Biosynthesis	7.3E-01	7.14E-02	NaN	0/14 (0%)	1/14 (7%)	0/14 (0%)	13/14 (93%)	TYMS
N-acetylglucosamine Degradation II	7.3E-01	7.69E-02	NaN	0/13 (0%)	1/13 (8%)	0/13 (0%)	12/13 (92%)	NAGK
Antigen Presentation Pathway	7.29E-01	7.14E-02	NaN	0/42 (0%)	3/42 (7%)	0/42 (0%)	39/42 (93%)	PSMB9,PSMB5,PSMB8
Toll-like Receptor Signaling	7.23E-01	6.25E-02	NaN	0/64 (0%)	4/64 (6%)	0/64 (0%)	60/64 (94%)	MAPK1,MAP3K1,NFKB2,NFKB1
Purine Nucleotides Degradation II (Aerobic)	7.16E-01	5.41E-02	NaN	0/37 (0%)	2/37 (5%)	0/37 (0%)	35/37 (95%)	IMPDH2,NT5C2
HER-2 Signaling in Breast Cancer	7.15E-01	6.1E-02	NaN	0/82 (0%)	5/82 (6%)	0/82 (0%)	77/82 (94%)	GRB2,PIK3CG,PIK3CD,PIK3R4,ATM
BMP signaling pathway	7.15E-01	5.81E-02	NaN	0/86 (0%)	5/86 (6%)	0/86 (0%)	81/86 (94%)	MAPK1,GRB2,MAPK3,NFKB2,NFKB1
Death Receptor Signaling	6.86E-01	5.88E-02	NaN	0/68 (0%)	4/68 (6%)	0/68 (0%)	64/68 (94%)	NFKB2,NFKB1,DIABLO,HSPB1
Tryptophan Degradation III (Eukaryotic)	6.84E-01	4.17E-02	NaN	0/48 (0%)	2/48 (4%)	0/48 (0%)	46/48 (96%)	HSD17B10,GCDH
Synaptic Long Term Depression	6.76E-01	4.94E-02	NaN	0/162 (0%)	8/162 (5%)	0/162 (0%)	154/162 (95%)	PPP2R1A,MAPK1,PPP2CA,PPP2R2A,PLCG2,MAPK3,PPP2R1B,PRDX6
Reelin Signaling in Neurons	6.69E-01	5.88E-02	NaN	0/85 (0%)	5/85 (6%)	0/85 (0%)	80/85 (94%)	CRKL,PIK3CG,PIK3CD,PIK3R4,ATM
Arginine Biosynthesis IV	6.59E-01	4.17E-02	NaN	0/24 (0%)	1/24 (4%)	0/24 (0%)	23/24 (96%)	GLUD1
Superpathway of Serine and Glycine Biosynthesis I	6.59E-01	5.56E-02	NaN	0/18 (0%)	1/18 (6%)	0/18 (0%)	17/18 (94%)	PHGDH
Acetyl-CoA Biosynthesis I (Pyruvate Dehydrogenase Complex)	6.59E-01	9.09E-02	NaN	0/11 (0%)	1/11 (9%)	0/11 (0%)	10/11 (91%)	DLD
Glycine Cleavage Complex	6.59E-01	6.67E-02	NaN	0/15 (0%)	1/15 (7%)	0/15 (0%)	14/15 (93%)	DLD
Glycogen Biosynthesis II (from UDP-D-Glucose)	6.59E-01	8.33E-02	NaN	0/12 (0%)	1/12 (8%)	0/12 (0%)	11/12 (92%)	GBE1
GDP-mannose Biosynthesis	6.59E-01	7.69E-02	NaN	0/13 (0%)	1/13 (8%)	0/13 (0%)	12/13 (92%)	GMPPB
Folate Polyglutamylation	6.01E-01	5E-02	NaN	0/20 (0%)	1/20 (5%)	0/20 (0%)	19/20 (95%)	MTHFD1
Role of JAK1, JAK2 and TYK2 in Interferon Signaling	5.98E-01	7.14E-02	NaN	0/28 (0%)	2/28 (7%)	0/28 (0%)	26/28 (93%)	NFKB2,NFKB1
Superpathway of D-myo-inositol (1,4,5)-trisphosphate Metabolism	5.98E-01	6.06E-02	NaN	0/33 (0%)	2/33 (6%)	0/33 (0%)	31/33 (94%)	INPP5B,SEC16A
Endothelin-1 Signaling	5.85E-01	4.69E-02	NaN	0/192 (0%)	9/192 (5%)	0/192 (0%)	183/192 (95%)	MAPK1,GRB2,PLCG2,PIK3CG,MAPK3,PIK3CD,PIK3R4,PRDX6,ATM
iNOS Signaling	5.82E-01	5.66E-02	NaN	0/53 (0%)	3/53 (6%)	0/53 (0%)	50/53 (94%)	MAPK1,NFKB2,NFKB1
3-phosphoinositide Biosynthesis	5.65E-01	4.42E-02	NaN	0/181 (0%)	8/181 (4%)	0/181 (0%)	173/181 (96%)	NUDT5,PIK3CG,PIK3CD,PALD1,PPP4R1,PIK3R4,SET,ATM
Pyridoxal 5'-phosphate Salvage Pathway	5.58E-01	5.26E-02	NaN	0/76 (0%)	4/76 (5%)	0/76 (0%)	72/76 (95%)	PDXK,MAPK1,MAPK3,CDK1
Histidine Degradation III	5.51E-01	5.56E-02	NaN	0/18 (0%)	1/18 (6%)	0/18 (0%)	17/18 (94%)	MTHFD1
α-Adrenergic Signaling	5.49E-01	4.59E-02	NaN	0/109 (0%)	5/109 (5%)	0/109 (0%)	104/109 (95%)	MAPK1,PLCG2,MAPK3,GNB2L1,GNB2
Dendritic Cell Maturation	5.34E-01	4.27E-02	NaN	0/211 (0%)	9/211 (4%)	0/211 (0%)	202/211 (96%)	MAPK1,PLCG2,PIK3CG,MAPK3,PIK3CD,NFKB2,NFKB1,PIK3R4,ATM
Role of MAPK Signaling in the Pathogenesis of Influenza	5.31E-01	5.56E-02	NaN	0/72 (0%)	4/72 (6%)	0/72 (0%)	68/72 (94%)	MAPK1,MAPK3,BAX,PRDX6
TNFR1 Signaling	5.3E-01	5.56E-02	NaN	0/54 (0%)	3/54 (6%)	0/54 (0%)	51/54 (94%)	MAP3K1,NFKB2,NFKB1
Crosstalk between Dendritic Cells and Natural Killer Cells	5.25E-01	4.72E-02	NaN	0/106 (0%)	5/106 (5%)	0/106 (0%)	101/106 (95%)	CAMK2D,ACTB,TLN1,NFKB2,NFKB1
Melatonin Signaling	5.05E-01	4.94E-02	NaN	0/81 (0%)	4/81 (5%)	0/81 (0%)	77/81 (95%)	CAMK2D,MAPK1,PLCG2,MAPK3
Glycogen Degradation II	4.71E-01	6.25E-02	NaN	0/16 (0%)	1/16 (6%)	0/16 (0%)	15/16 (94%)	AGL
Folate Transformations I	4.71E-01	3.03E-02	NaN	0/33 (0%)	1/33 (3%)	0/33 (0%)	32/33 (97%)	MTHFD1
Salvage Pathways of Pyrimidine Ribonucleotides	4.71E-01	4.42E-02	NaN	0/113 (0%)	5/113 (4%)	0/113 (0%)	108/113 (96%)	PYCRL,NME1,MAPK1,MAPK3,CDK1
Fatty Acid β-oxidation I	4.65E-01	4.44E-02	NaN	0/45 (0%)	2/45 (4%)	0/45 (0%)	43/45 (96%)	HSD17B10,ECHS1
G-Protein Coupled Receptor Signaling	4.57E-01	4.35E-02	NaN	0/276 (0%)	12/276 (4%)	0/276 (0%)	264/276 (96%)	CAMK2D,MAPK1,PTK2B,GRB2,PDE12,PIK3CG,MAPK3,PIK3CD,NFKB2,NFKB1,PIK3R4,ATM
Semaphorin Signaling in Neurons	4.55E-01	5.56E-02	NaN	0/54 (0%)	3/54 (6%)	0/54 (0%)	51/54 (94%)	MAPK1,MAPK3,FNBP1
Dopamine Receptor Signaling	4.34E-01	4.17E-02	NaN	0/96 (0%)	4/96 (4%)	0/96 (0%)	92/96 (96%)	PPP2R1A,PPP2CA,PPP2R2A,PPP2R1B
Amyotrophic Lateral Sclerosis Signaling	4.31E-01	3.97E-02	NaN	0/126 (0%)	5/126 (4%)	0/126 (0%)	121/126 (96%)	PIK3CG,PIK3CD,BAX,PIK3R4,ATM
Wnt/β-catenin Signaling	4.13E-01	4.57E-02	NaN	0/175 (0%)	8/175 (5%)	0/175 (0%)	167/175 (95%)	PPP2R1A,PPP2CA,PPP2R2A,CSNK2A1,RUVBL2,CSNK2B,PPP2R1B,APC
Cholecystokinin/Gastrin-mediated Signaling	4.13E-01	4.72E-02	NaN	0/106 (0%)	5/106 (5%)	0/106 (0%)	101/106 (95%)	MAPK1,PTK2B,GRB2,MAPK3,FNBP1
TWEAK Signaling	4.12E-01	5.13E-02	NaN	0/39 (0%)	2/39 (5%)	0/39 (0%)	37/39 (95%)	NFKB2,NFKB1
Glycogen Degradation III	4.09E-01	5.56E-02	NaN	0/18 (0%)	1/18 (6%)	0/18 (0%)	17/18 (94%)	AGL
Interferon Signaling	3.96E-01	5.56E-02	NaN	0/36 (0%)	2/36 (6%)	0/36 (0%)	34/36 (94%)	PSMB8,BAX
Assembly of RNA Polymerase III Complex	3.82E-01	6.25E-02	NaN	0/16 (0%)	1/16 (6%)	0/16 (0%)	15/16 (94%)	SF3A1
Guanosine Nucleotides Degradation III	3.82E-01	4.35E-02	NaN	0/23 (0%)	1/23 (4%)	0/23 (0%)	22/23 (96%)	NT5C2
Chondroitin Sulfate Degradation (Metazoa)	3.58E-01	4.35E-02	NaN	0/23 (0%)	1/23 (4%)	0/23 (0%)	22/23 (96%)	MGEA5
Calcium Signaling	3.55E-01	3.69E-02	NaN	0/217 (0%)	8/217 (4%)	0/217 (0%)	209/217 (96%)	RAP1B,HDAC6,CAMK2D,MAPK1,MYL6,MAPK3,MYH9,TPM3
Dermatan Sulfate Degradation (Metazoa)	3.36E-01	4.35E-02	NaN	0/23 (0%)	1/23 (4%)	0/23 (0%)	22/23 (96%)	MGEA5
Methylglyoxal Degradation III	3.36E-01	4.55E-02	NaN	0/22 (0%)	1/22 (5%)	0/22 (0%)	21/22 (95%)	AKR7A2
Activation of IRF by Cytosolic Pattern Recognition Receptors	3.28E-01	4.05E-02	NaN	0/74 (0%)	3/74 (4%)	0/74 (0%)	71/74 (96%)	IKBKAP,NFKB2,NFKB1
Corticotropin Releasing Hormone Signaling	3.17E-01	3.45E-02	NaN	0/145 (0%)	5/145 (3%)	0/145 (0%)	140/145 (97%)	RAP1B,MAPK1,PLCG2,MAPK3,ARPC5
Parkinson's Signaling	3.16E-01	5.26E-02	NaN	0/19 (0%)	1/19 (5%)	0/19 (0%)	18/19 (95%)	MAPK1
Role of PKR in Interferon Induction and Antiviral Response	3.15E-01	4.08E-02	NaN	0/49 (0%)	2/49 (4%)	0/49 (0%)	47/49 (96%)	NFKB2,NFKB1
Thyroid Cancer Signaling	3.15E-01	4.55E-02	NaN	0/44 (0%)	2/44 (5%)	0/44 (0%)	42/44 (95%)	MAPK1,MAPK3
Glutathione Redox Reactions I	2.98E-01	4.17E-02	NaN	0/24 (0%)	1/24 (4%)	0/24 (0%)	23/24 (96%)	PRDX6
Adenosine Nucleotides Degradation II	2.98E-01	3.57E-02	NaN	0/28 (0%)	1/28 (4%)	0/28 (0%)	27/28 (96%)	NT5C2
UVC-Induced MAPK Signaling	2.92E-01	4.55E-02	NaN	0/44 (0%)	2/44 (5%)	0/44 (0%)	42/44 (95%)	MAPK1,MAPK3
IL-10 Signaling	2.83E-01	3.85E-02	NaN	0/78 (0%)	3/78 (4%)	0/78 (0%)	75/78 (96%)	MAPK1,NFKB2,NFKB1
Agrin Interactions at Neuromuscular Junction	2.83E-01	4.29E-02	NaN	0/70 (0%)	3/70 (4%)	0/70 (0%)	67/70 (96%)	MAPK1,MAPK3,ACTB
Endoplasmic Reticulum Stress Pathway	2.81E-01	5.26E-02	NaN	0/19 (0%)	1/19 (5%)	0/19 (0%)	18/19 (95%)	HSPA5
Role of Osteoblasts, Osteoclasts and Chondrocytes in Rheumatoid Arthritis	2.74E-01	3.6E-02	NaN	0/250 (0%)	9/250 (4%)	0/250 (0%)	241/250 (96%)	MAPK1,PTK2B,PIK3CG,MAPK3,PIK3CD,NFKB1,PIK3R4,APC,ATM
Role of RIG1-like Receptors in Antiviral Innate Immunity	2.71E-01	4.08E-02	NaN	0/49 (0%)	2/49 (4%)	0/49 (0%)	47/49 (96%)	NFKB2,NFKB1
Synaptic Long Term Potentiation	2.71E-01	3.85E-02	NaN	0/130 (0%)	5/130 (4%)	0/130 (0%)	125/130 (96%)	RAP1B,CAMK2D,MAPK1,PLCG2,MAPK3
LXR/RXR Activation	2.65E-01	3.6E-02	NaN	0/139 (0%)	5/139 (4%)	0/139 (0%)	134/139 (96%)	ECHS1,FASN,ACACA,NFKB2,NFKB1
Gαi Signaling	2.59E-01	3.7E-02	NaN	0/135 (0%)	5/135 (4%)	0/135 (0%)	130/135 (96%)	MAPK1,GRB2,MAPK3,GNB2L1,GNB2
Maturity Onset Diabetes of Young (MODY) Signaling	2.13E-01	3.03E-02	NaN	0/33 (0%)	1/33 (3%)	0/33 (0%)	32/33 (97%)	GAPDH
Gluconeogenesis I	2.13E-01	2.13E-02	NaN	0/47 (0%)	1/47 (2%)	0/47 (0%)	46/47 (98%)	GAPDH
Estrogen-mediated S-phase Entry	2.02E-01	3.57E-02	NaN	0/28 (0%)	1/28 (4%)	0/28 (0%)	27/28 (96%)	CDK1

## Sheet: Daudi
© 2000-2016 QIAGEN. All rights reserved.
Ingenuity Canonical Pathways	-log(p-value)	Ratio	z-score	Molecules
EIF2 Signaling	6.05E01	5.27E-01	NaN	RPL27A,PIK3R1,HRAS,EIF4A2,RPS11,EIF3B,PIK3CG,RPL12,RPL8,ATM,PABPC1,PIK3C2B,RPL3,RPL27,RPLP0,RPL10A,RPS6,RPS4X,RPS15,PIK3CD,RPS25,RPLP1,EIF3K,RPL24,EIF2B4,RPS18,RPL14,RPL26,RPL35A,RPS17/RPS17L,EIF4G1,EIF2B2,EIF4E,RPL7,RPL35,PIK3C3,RPS9,EIF3A,RPLP2,RPS5,RPL31,RPL18,RPL13,RPS24,RPL4,GRB2,RPL34,RPS2,RPL17,RPS19,RPL21,EIF3G,RPS16,RPL5,UBA52,EIF4A1,RPL32,EIF2B1,RPS14,RPL11,RPL22,MAPK1,PIK3R4,RPS23,EIF3…
Regulation of eIF4 and p70S6K Signaling	3.36E01	4.06E-01	NaN	MAPK1,PPP2CA,PIK3R1,HRAS,EIF4A2,PIK3R4,RPS23,EIF3C/EIF3CL,RPS11,RPS7,RPS3A,EIF3B,EIF3D,PIK3CG,MAPK3,RPS20,RPS10,ATM,PABPC1,PIK3C2B,EIF2B3,EIF3E,EIF3M,RPS6,PPP2R1A,RPS4X,EIF4A3,RPS15,PIK3CD,RPS25,RPS15A,RPSA,EIF3K,EIF2B4,PPP2R2A,RPS18,RPS8,RPS13,RPS17/RPS17L,EIF4G1,EIF2S1,EIF2B2,EIF4E,MTOR,PIK3C3,RPS9,EIF2S3,EIF3A,PPP2R5C,RPS3,RPS5,RPS24,GRB2,RPS2,RPS19,EIF3J,RPS27L,RPS12,EIF3G,EIF3F,MAPK14,RPS16,…
Protein Ubiquitination Pathway	3.36E01	3.52E-01	NaN	PSMA3,PSMA7,USP5,UBE3B,UBR2,PSMB8,DNAJB2,HSPA5,SKP1,TCEB1,PSMC5,USP48,USP7,PAN2,HSPA4,UCHL5,SUGT1,PSMC2,PSMA2,NEDD4L,USP28,PSMA6,PSMB5,UBE4B,HSPA9,USP9X,PSME2,PSMD5,PSMC4,PSMD6,PSMD3,TCEB2,HSPA8,PSMD11,PSMB7,PSMB2,RBX1,UBR1,PSMA5,PSMD12,PSMA4,PSMB1,HSP90AA1,PSMD1,PSMD4,UBE2C,PSMB3,USP24,USP14,PSMB10,PSMD9,USP11,HSPA6,DNAJC10,DNAJA1,ANAPC1,PSMB6,HSPA1L,UBE4A,USO1,HSP90B1,PSMD10,USP13,HSP90AB1,PSMC…
mTOR Signaling	2.51E01	3.33E-01	NaN	MAPK1,PPP2CA,PIK3R1,HRAS,EIF4A2,PIK3R4,RICTOR,EIF3C/EIF3CL,RPS23,RPS11,RPS7,RHOG,RPS3A,EIF3B,EIF3D,PIK3CG,MAPK3,PRKAA1,RPS20,RPS10,ATM,EIF4B,PIK3C2B,EIF3E,EIF3M,RPS6,PPP2R1A,RPS4X,EIF4A3,RPS15,PIK3CD,RPS25,RPS15A,RPS6KA1,FNBP1,RPSA,EIF3K,PPP2R2A,RPS18,RPS6KA3,RPS8,RPS13,RPS17/RPS17L,EIF4G1,EIF4E,PRKAG1,MTOR,PIK3C3,RPS9,EIF3A,PPP2R5C,RPS3,RPS5,RPS24,RPS2,RPS19,EIF3J,RPS27L,RPS12,EIF3G,EIF3F,PRKCI,…
Remodeling of Epithelial Adherens Junctions	1.42E01	4.43E-01	NaN	NME1,RALA,RAB5C,ARPC1B,ARPC5,TUBB,IQGAP1,ACTR3,ARPC3,TUBB4A,VCL,ACTC1,DNM2,ACTR2,TUBB3,ARPC5L,TUBB4B,ACTB,MAPRE1,TUBB2A,RAB7A,TUBA4A,ACTG1,TUBA1B,TUBB6,TUBB8,ARPC2,MAPRE2,ACTN4,DNM1L,ARPC4
CD28 Signaling in T Helper Cells	1.32E01	2.94E-01	NaN	ARPC1B,PIK3R1,NFKBIE,ARPC5,HLA-DRB1,HLA-DQB1,CDC42,NFKB1,PIK3R4,PTPRC,IKBKB,IKBKG,NFKBIA,ACTR3,PPP3CB,PPP3R1,PIK3CG,PIK3C3,HLA-DRA,ARPC3,NFKBIB,PPP3CA,ATM,PIK3C2B,ACTR2,CALML5,ARPC5L,GRB2,CSK,PLCG1,NFATC4,MALT1,NFKB2,CARD11,SYK,ARPC2,VAV1,PIK3CB,PIK3CD,ARPC4
Hereditary Breast Cancer Signaling	1.32E01	2.99E-01	NaN	NPM1,POLR2D,PIK3R1,CDK4,HRAS,POLR2B,PIK3R4,RAD50,MLH1,HDAC6,POLR2A,POLR2C,FANCD2,PIK3CG,PIK3C3,RFC2,POLR2H,BLM,ATM,TP53,PIK3C2B,PMS2,HDAC2,HDAC1,CDK6,RFC1,RPA1,RFC5,CDK1,POLR2G,RFC4,MSH2,POLR2E,MSH6,PIK3CB,ATR,PIK3CD,POLR2I,FANCA,RFC3
tRNA Charging	1.19E01	2.59E-01	NaN	CARS,GARS,TARS,QARS,MARS,NARS2,EPRS,NARS,WARS,LARS,RARS,YARS,VARS2,KARS,DARS,EARS2,AARS,VARS,SARS,SARS2,IARS
RAN Signaling	1.17E01	5.83E-01	NaN	KPNB1,KPNA3,KPNA4,KPNA6,CSE1L,RCC1,TNPO1,KPNA2,RANGAP1,RANBP2,RAN,XPO1,KPNA1,IPO5
Glucocorticoid Receptor Signaling	1.15E01	2.07E-01	NaN	JAK1,POLR2D,YWHAH,MAPK1,PIK3R1,HRAS,GTF2E2,PIK3R4,HSPA5,IKBKB,HSPA4,IKBKG,MAPK3,PIK3CG,PPP3R1,PRKAA1,POLR2H,NFKBIB,TAB1,ATM,PIK3C2B,SMAD2,HSPA9,GTF2F1,STAT3,HSPA8,POLR2E,HSP90AA1,PIK3CD,NR3C2,POLR2I,ICAM1,GTF2F2,NFKBIE,HSPA6,POLR2B,NFKB1,HSPA1L,PRKAG1,HSP90B1,GTF2B,NFKBIA,POLR2C,POLR2A,HSP90AB1,PPP3CB,PIK3C3,NCOR1,FKBP5,STAT5B,STAT1,PPP3CA,GRB2,NFATC4,HSPA2,POLR2G,MAPK14,GTF2E1,FKBP4,PIK3CB,NCOR2…
B Cell Receptor Signaling	1.13E01	2.57E-01	NaN	RAC2,MAPK1,PIK3R1,NFKBIE,HRAS,MAP3K4,CDC42,NFKB1,PIK3R4,PTPRC,IKBKB,IKBKG,MTOR,NFKBIA,CAMK2D,PPP3CB,PPP3R1,MAPK3,INPP5B,PIK3CG,PIK3C3,CD22,NFKBIB,PPP3CA,ATM,ETS1,PIK3C2B,CD19,CALML5,CD79B,GRB2,CSK,NFATC4,MALT1,NFKB2,INPP5D,BTK,MAPK14,SYK,PLCG2,VAV1,PIK3AP1,PIK3CB,PIK3CD,CAMK2G
p70S6K Signaling	1.06E01	2.8E-01	NaN	JAK1,MAPK1,YWHAH,PPP2R2A,PPP2CA,PIK3R1,HRAS,PIK3R4,YWHAQ,MTOR,PIK3CG,MAPK3,PIK3C3,PPP2R5C,EEF2K,ATM,PIK3C2B,CD19,YWHAG,YWHAE,CD79B,EEF2,YWHAB,GRB2,YWHAZ,PLCG1,PLCL2,RPS6,BTK,PPP2R1A,PRKCI,SYK,PLCG2,PIK3CB,PIK3CD,PPP2R5E,PPP2R1B
Huntington's Disease Signaling	1.05E01	2.14E-01	NaN	POLR2D,MAPK1,PIK3R1,GNB2L1,HRAS,HSPA5,PIK3R4,HDAC6,GNB1,HSPA4,PIK3CG,MAPK3,POLR2H,DNM2,ATM,TP53,PIK3C2B,RCOR1,HDAC2,CLTC,HSPA9,HSPA8,DYNC1I2,ATP5B,POLR2E,PIK3CD,POLR2I,CASP5,CAPN11,PACSIN1,HSPA6,POLR2B,HSPA1L,MTOR,POLR2C,POLR2A,ARFIP2,PIK3C3,NCOR1,GOSR1,GRB2,GLS,HDAC1,BAX,HSPA2,POLR2G,CASP12,CAPNS1,PRKCI,STX16,DCTN1,PIK3CB,NCOR2,DNM1L
PI3K/AKT Signaling	1.02E01	2.43E-01	NaN	JAK1,MAPK1,YWHAH,PPP2R2A,PPP2CA,PIK3R1,NFKBIE,HRAS,NFKB1,EIF4E,YWHAQ,IKBKB,MTOR,HSP90B1,IKBKG,NFKBIA,HSP90AB1,INPP5B,PIK3CG,MAPK3,PPP2R5C,NFKBIB,TP53,CDC37,YWHAG,YWHAE,GRB2,YWHAB,YWHAZ,NFKB2,INPP5D,PPP2R1A,HSP90AA1,PIK3CB,PIK3CD,PPP2R5E,PPP2R1B
PKCθ Signaling in T Lymphocytes	9.75E00	2.43E-01	NaN	RAC2,MAPK1,PIK3R1,NFKBIE,HLA-DRB1,HRAS,HLA-DQB1,MAP3K4,NFKB1,PIK3R4,IKBKB,IKBKG,NFKBIA,CAMK2D,PPP3CB,PPP3R1,PIK3CG,PIK3C3,MAPK3,HLA-DRA,NFKBIB,PPP3CA,ATM,PIK3C2B,GRB2,PLCG1,NFKB2,NFATC4,MALT1,CARD11,PLCG2,PIK3CB,VAV1,PIK3CD,CAMK2G
Actin Cytoskeleton Signaling	9.64E00	2.11E-01	NaN	MYH10,RAC2,PFN1,MAPK1,MYL6,PIK3R1,ARPC5,HRAS,TLN1,ARHGEF1,PIK3R4,LIMK1,PTK2,CYFIP2,MAPK3,PIK3CG,ATM,ACTR2,PIK3C2B,CRKL,WASF1,MYL12A,TLN2,CYFIP1,ARPC2,PIK3CD,VAV1,ACTN4,WASF2,ARPC1B,TRIO,PPP1CB,CDC42,IQGAP1,DIAPH1,ACTR3,FLNA,PIK3C3,ARPC3,VCL,ACTC1,ARPC5L,GRB2,CSK,ACTB,ACTG1,MYL1,MYH9,PIK3CB,NCKAP1L,ARPC4
14-3-3-mediated Signaling	9.64E00	2.89E-01	NaN	MAPK1,YWHAH,PIK3R1,HRAS,TUBB,PIK3R4,YWHAQ,MAPK3,PIK3C3,PIK3CG,TUBB4A,PDCD6IP,ATM,PIK3C2B,TUBB3,YWHAG,YWHAE,YWHAB,GRB2,TUBB4B,TUBB2A,EDC3,YWHAZ,TUBA4A,PLCG1,BAX,PLCL2,TUBA1B,PRKCI,TUBB6,TUBB8,PLCG2,PIK3CB,PIK3CD,RPS6KA1
NRF2-mediated Oxidative Stress Response	9.3E00	2.31E-01	NaN	AKR7A2,USP14,FTL,MAPK1,PPIB,PRDX1,NQO2,PIK3R1,DNAJA4,HRAS,DNAJC10,DNAJB2,PIK3R4,DNAJA1,CUL3,MAPK3,PIK3C3,PIK3CG,VCP,PMF1/PMF1-BGLAP,DNAJA2,FKBP5,ACTC1,ATM,GSTK1,PIK3C2B,ACTB,ACTG1,TXNRD1,DNAJC21,PRKCI,ERP29,MAPK14,STIP1,RBX1,DNAJB11,CAT,CCT7,PIK3CB,PIK3CD,CDC34,SQSTM1,GSTP1,DNAJC7,FTH1
Mismatch Repair in Eukaryotes	9.29E00	5E-01	NaN	PCNA,PMS2,MSH2,RFC4,MSH6,RFC2,RFC1,RPA1,RFC5,POLD1,MLH1,RFC3
fMLP Signaling in Neutrophils	9.28E00	2.5E-01	NaN	ARPC1B,MAPK1,PIK3R1,NFKBIE,ARPC5,GNB2L1,HRAS,CDC42,NFKB1,PIK3R4,GNB1,NFKBIA,ACTR3,PPP3CB,PPP3R1,PIK3CG,PIK3C3,MAPK3,ARPC3,NFKBIB,PPP3CA,ATM,PIK3C2B,ACTR2,CALML5,ARPC5L,NFKB2,NFATC4,PRKCI,ARPC2,PIK3CB,PIK3CD,ARPC4
Rac Signaling	9.21E00	2.5E-01	NaN	MAPK1,ARPC1B,PTK2B,PIK3R1,ARPC5,HRAS,PIK3R4,NFKB1,CDC42,IQGAP1,LIMK1,PTK2,CYFIP2,ACTR3,ARFIP2,PIK3C3,PIK3CG,MAPK3,ARPC3,PI4KA,ATM,PIK3C2B,ACTR2,ARPC5L,WASF1,NFKB2,PRKCI,CYFIP1,ARPC2,PIK3CB,PIK3CD,ARPC4
PI3K Signaling in B Lymphocytes	9.07E00	2.52E-01	NaN	CD81,MAPK1,PIK3R1,NFKBIE,HRAS,NFKB1,PTPRC,BLK,IKBKB,IKBKG,CAMK2D,NFKBIA,PPP3CB,PPP3R1,MAPK3,PIK3CG,NFKBIB,PPP3CA,CALML5,CD19,CD79B,PLCG1,PLCL2,NFATC4,NFKB2,MALT1,INPP5D,BTK,PRKCI,SYK,PLCG2,PIK3CB,VAV1,PIK3AP1,PIK3CD,CAMK2G
Breast Cancer Regulation by Stathmin1	8.77E00	2.15E-01	NaN	MAPK1,PPP2R2A,PPP2CA,PIK3R1,GNB2L1,HRAS,PPP1CB,ARHGEF1,CDC42,TUBB,PIK3R4,PRKAG1,LIMK1,GNB1,CAMK2D,MAPK3,PIK3CG,PIK3C3,ARHGEF2,TUBB4A,PPP2R5C,PPP1CA,ATM,TP53,PIK3C2B,TUBB3,CALML5,TUBB4B,GRB2,TUBB2A,TUBA4A,PRKAR2A,TUBA1B,CDK1,PPP2R1A,PRKAR2B,PRKCI,TUBB6,TUBB8,ARHGEF18,PIK3CB,PIK3CD,PPP2R5E,PPP2R1B,PRKAR1A,CAMK2G
VEGF Signaling	8.69E00	2.66E-01	NaN	EIF2B4,MAPK1,PTK2B,PIK3R1,HRAS,PIK3R4,EIF2S1,EIF2B2,ELAVL1,PTK2,PIK3C3,PIK3CG,MAPK3,EIF2S3,VCL,ACTC1,ATM,PIK3C2B,YWHAE,GRB2,ACTB,PLCG1,EIF2B3,ACTG1,PLCG2,EIF2B1,PIK3CB,PIK3CD,ACTN4
ERK/MAPK Signaling	8.65E00	2.13E-01	NaN	RAC2,MAPK1,PTK2B,YWHAH,PPP2R2A,PPP2CA,PIK3R1,HRAS,PPP1CB,TLN1,PIK3R4,EIF4E,PRKAG1,PTK2,YWHAQ,MAPK3,PIK3CG,PIK3C3,PPP2R5C,PPP1CA,STAT1,ATM,ETS1,PIK3C2B,YWHAG,GRB2,YWHAB,CRKL,YWHAZ,PRKAR2A,PLCG1,STAT3,RAP1A,PPP2R1A,TLN2,PRKCI,PRKAR2B,ARAF,PLCG2,PIK3CB,PIK3CD,RPS6KA1,PPP2R5E,PPP2R1B,PRKAR1A
iCOS-iCOSL Signaling in T Helper Cells	8.24E00	2.46E-01	NaN	PIK3R1,NFKBIE,HLA-DRB1,HLA-DQB1,NFKB1,PIK3R4,PTPRC,IKBKB,IKBKG,CAMK2D,NFKBIA,PPP3CB,PPP3R1,PIK3CG,PIK3C3,HLA-DRA,NFKBIB,PPP3CA,ATM,PIK3C2B,CALML5,GRB2,CSK,PLCG1,NFKB2,NFATC4,INPP5D,PIK3CB,VAV1,PIK3CD,CAMK2G
IGF-1 Signaling	8.1E00	2.71E-01	NaN	JAK1,MAPK1,YWHAH,PIK3R1,HRAS,PIK3R4,PRKAG1,YWHAQ,PTK2,MAPK3,PIK3C3,PIK3CG,CSNK2A1,CSNK2B,ATM,PIK3C2B,YWHAG,YWHAE,GRB2,YWHAB,YWHAZ,PRKAR2A,STAT3,CSNK2A2,PRKAR2B,PRKCI,PIK3CB,PIK3CD,PRKAR1A
T Cell Receptor Signaling	8.1E00	2.66E-01	NaN	MAPK1,PIK3R1,HRAS,PIK3R4,NFKB1,PTPRC,IKBKB,IKBKG,NFKBIA,PPP3CB,PIK3CG,PPP3R1,PIK3C3,MAPK3,PPP3CA,ATM,PIK3C2B,CALML5,GRB2,CSK,PLCG1,MALT1,NFATC4,NFKB2,BTK,CARD11,PIK3CB,VAV1,PIK3CD
EGF Signaling	7.97E00	3.28E-01	NaN	PIK3C2B,JAK1,MAPK1,GRB2,PIK3R1,HRAS,PLCG1,STAT3,PIK3R4,CSNK2A2,MTOR,MAPK14,PIK3C3,PIK3CG,MAPK3,CSNK2A1,PIK3CB,PIK3CD,CSNK2B,STAT1,ATM
Clathrin-mediated Endocytosis Signaling	7.89E00	2.17E-01	NaN	EPS15,APOB,RAB5C,ARPC1B,PIK3R1,ARPC5,CDC42,PIK3R4,ACTR3,PPP3CB,PIK3C3,PPP3R1,PIK3CG,CSNK2A1,ARPC3,CSNK2B,ACTC1,DNM2,PPP3CA,ATM,ACTR2,PIK3C2B,AP2B1,ARPC5L,GRB2,ACTB,USP9X,CLTC,RAB7A,ACTG1,HSPA8,CSNK2A2,ALB,LDLR,ARPC2,RAB11A,TFRC,PIK3CB,PIK3CD,DNM1L,CTTN,MYO1E,ARPC4
CD40 Signaling	7.66E00	3.1E-01	NaN	PIK3C2B,ICAM1,MAPK1,NFKBIE,PIK3R1,NFKB2,STAT3,PIK3R4,NFKB1,TANK,IKBKB,IKBKG,MAPK14,NFKBIA,PIK3C3,PIK3CG,MAPK3,PIK3CB,IKBKAP,PIK3CD,NFKBIB,ATM
GM-CSF Signaling	7.66E00	3.24E-01	NaN	ETS1,PIK3C2B,MAPK1,GRB2,PIK3R1,GNB2L1,HRAS,STAT3,PIK3R4,CAMK2D,PPP3CB,PIK3C3,PIK3CG,MAPK3,PPP3R1,PIK3CB,PIK3CD,STAT5B,STAT1,PPP3CA,ATM,CAMK2G
Systemic Lupus Erythematosus Signaling	7.15E00	1.84E-01	NaN	PPIH,CD2BP2,SNRPC,PRPF19,MAPK1,PRPF3,PRPF8,PIK3R1,HNRNPA2B1,PRPF39,HRAS,PRPF4,PIK3R4,SART1,PTPRC,LSM14A,SNRPA,MTOR,EFTUD2,MAPK3,PIK3C3,PIK3CG,CD22,IGHM,SNRPD1,SNRPD3,SNRPD2,HNRNPC,SNRPA1,LSM4,ATM,PIK3C2B,SNRPB,CD79B,GRB2,IGKC,PLCG1,NFATC4,INPP5D,LSM12,HLA-C,PLCG2,SNRPB2,SNRNP200,SNRNP70,PIK3CB,PIK3CD
Signaling by Rho Family GTPases	7.09E00	1.83E-01	NaN	SEPT9,ARPC1B,MAPK1,MYL6,PTK2B,PIK3R1,GNB2L1,ARPC5,ARHGEF1,NFKB1,PIK3R4,IQGAP1,CDC42,LIMK1,GNB1,PTK2,ARFIP2,ACTR3,RHOG,MAPK3,PIK3C3,PIK3CG,ARPC3,ARHGEF2,ACTC1,PI4KA,ATM,PIK3C2B,ACTR2,ARPC5L,ACTB,SEPT7,WASF1,NFKB2,ACTG1,SEPT1,MYL1,MYL12A,PRKCI,CYFIP1,ARPC2,ARHGEF18,PIK3CB,PIK3CD,SEPT6,FNBP1,SEPT2,ARPC4
Telomerase Signaling	7.06E00	2.64E-01	NaN	MAPK1,PPP2R2A,PPP2CA,PIK3R1,HRAS,PIK3R4,HDAC6,HSP90B1,HSP90AB1,MAPK3,PIK3CG,PIK3C3,PPP2R5C,ATM,TP53,ETS1,PIK3C2B,HDAC2,GRB2,DKC1,HDAC1,PPP2R1A,HSP90AA1,TPP1,PIK3CB,PIK3CD,PPP2R5E,PPP2R1B
Integrin Signaling	7.05E00	2.07E-01	NaN	RAC2,RALA,CAPN11,ARPC1B,MAPK1,PIK3R1,ARPC5,HRAS,PPP1CB,TLN1,CDC42,PIK3R4,PTK2,ACTR3,RHOG,MAPK3,PIK3CG,PIK3C3,ARPC3,VCL,ACTC1,ATM,ACTR2,PIK3C2B,ARPC5L,GRB2,CRKL,ACTB,PLCG1,ACTG1,RAP1A,MYL12A,ARF1,TLN2,CAPNS1,ARPC2,PLCG2,PIK3CB,PIK3CD,ACTN4,CTTN,FNBP1,ARPC4
IL-2 Signaling	6.91E00	3.11E-01	NaN	PIK3C2B,JAK1,PTK2B,MAPK1,GRB2,PIK3R1,HRAS,PIK3R4,CSNK2A2,PIK3C3,MAPK3,PIK3CG,SYK,CSNK2A1,PIK3CB,PIK3CD,CSNK2B,STAT5B,ATM
RANK Signaling in Osteoclasts	6.7E00	2.58E-01	NaN	PTK2B,MAPK1,NFKBIE,PIK3R1,MAP3K4,PIK3R4,NFKB1,IKBKB,IKBKG,NFKBIA,PPP3CB,PIK3C3,PIK3CG,MAPK3,PPP3R1,NFKBIB,PPP3CA,ATM,PIK3C2B,CALML5,NFKB2,XIAP,MAPK14,PIK3CB,PIK3CD
Fcγ Receptor-mediated Phagocytosis in Macrophages and Monocytes	6.68E00	2.45E-01	NaN	ACTR2,RAC2,PTK2B,ARPC1B,MAPK1,ARPC5L,ACTB,PIK3R1,ARPC5,PLCG1,TLN1,CDC42,ACTG1,INPP5D,TLN2,PRKCI,ACTR3,SYK,ARPC2,PIK3CG,MAPK3,RAB11A,ARPC3,VAV1,ACTC1,ARPC4
Angiopoietin Signaling	6.68E00	2.8E-01	NaN	PIK3C2B,GRB2,NFKBIE,PIK3R1,HRAS,NFKB2,PIK3R4,NFKB1,PTK2,IKBKB,TNIP1,IKBKG,NFKBIA,PIK3C3,PIK3CG,PIK3CB,IKBKAP,PIK3CD,NFKBIB,STAT5B,ATM
Role of CHK Proteins in Cell Cycle Checkpoint Control	6.61E00	3.22E-01	NaN	TP53,PPP2CA,PPP2R2A,RPA1,RFC1,RFC5,CDK1,RAD50,PPP2R1A,PCNA,RFC4,RAD17,RFC2,PPP2R5C,ATR,PPP2R5E,PPP2R1B,RFC3,ATM
IL-3 Signaling	6.6E00	2.93E-01	NaN	PIK3C2B,JAK1,MAPK1,GRB2,CRKL,PIK3R1,HRAS,STAT3,PIK3R4,INPP5D,PRKCI,PPP3CB,PIK3CG,PIK3C3,MAPK3,PPP3R1,PIK3CB,PIK3CD,STAT5B,STAT1,PPP3CA,ATM
RhoA Signaling	6.6E00	2.44E-01	NaN	PFN1,ARPC1B,SEPT9,MYL6,PTK2B,ARPC5,RAPGEF6,PPP1CB,ARHGEF1,LIMK1,PTK2,ACTR3,ARPC3,ACTC1,PI4KA,ACTR2,ARPC5L,ACTB,SEPT7,ARHGAP4,WASF1,SEPT1,ACTG1,MYL1,MYL12A,ARPC2,SEPT6,ARHGAP1,ARPC4,SEPT2
Chronic Myeloid Leukemia Signaling	6.58E00	2.45E-01	NaN	PA2G4,MAPK1,PIK3R1,CDK4,HRAS,PIK3R4,NFKB1,CTBP1,HDAC6,IKBKB,IKBKG,PIK3C3,PIK3CG,MAPK3,STAT5B,ATM,TP53,PIK3C2B,HDAC2,GRB2,CRKL,HDAC1,CDK6,NFKB2,PIK3CB,PIK3CD
PDGF Signaling	6.55E00	2.67E-01	NaN	PIK3C2B,JAK1,MAPK1,GRB2,PIK3R1,CRKL,HRAS,PLCG1,STAT3,PIK3R4,INPP5D,CSNK2A2,PIK3CG,PLCG2,INPP5B,PIK3C3,MAPK3,CSNK2A1,PIK3CB,PIK3CD,CSNK2B,STAT1,ATM
Prostate Cancer Signaling	6.51E00	2.33E-01	NaN	TP53,PIK3C2B,PA2G4,MAPK1,GRB2,NFKBIE,PIK3R1,HRAS,NFKB2,PIK3R4,NFKB1,HSP90B1,MTOR,NFKBIA,HSP90AB1,PIK3C3,PIK3CG,MAPK3,HSP90AA1,PIK3CB,PIK3CD,NFKBIB,GSTP1,ATM
IL-15 Signaling	6.51E00	2.78E-01	NaN	PIK3C2B,JAK1,MAPK1,PIK3R1,HRAS,PLCG1,NFKB2,STAT3,PIK3R4,NFKB1,PTK2,MAPK14,PIK3C3,SYK,PIK3CG,MAPK3,PIK3CB,PIK3CD,STAT5B,ATM
Production of Nitric Oxide and Reactive Oxygen Species in Macrophages	6.43E00	1.84E-01	NaN	JAK1,APOB,MAPK1,PPP2R2A,PPP2CA,PIK3R1,NFKBIE,PPP1CB,MAP3K4,NFKB1,PIK3R4,IKBKB,IKBKG,NFKBIA,RHOG,MAPK3,PIK3CG,PIK3C3,PPP2R5C,PPP1CA,STAT1,NFKBIB,ATM,PIK3C2B,PLCG1,NFKB2,RAP1A,ALB,PPP2R1A,MAPK14,PRKCI,PLCG2,CAT,PIK3CB,PIK3CD,IRF8,PPP2R5E,PPP2R1B,FNBP1
Erythropoietin Signaling	6.42E00	2.66E-01	NaN	PIK3C2B,MAPK1,GRB2,NFKBIE,PIK3R1,HRAS,PLCG1,NFKB2,PIK3R4,NFKB1,NFKBIA,PRKCI,PIK3C3,PIK3CG,PLCG2,MAPK3,PIK3CB,PIK3CD,NFKBIB,STAT5B,ATM
Epithelial Adherens Junction Signaling	6.4E00	2.21E-01	NaN	MYH10,ARPC1B,MYL6,ARPC5,HRAS,TUBB,CDC42,IQGAP1,ACTR3,AGGF1,ARPC3,TUBB4A,VCL,ACTC1,ACTR2,TUBB3,ARPC5L,TUBB4B,ACTB,TUBB2A,TUBA4A,WASF1,ACTG1,RAP1A,TUBA1B,MYL1,NOTCH4,TUBB6,TUBB8,ARPC2,MYH9,ACTN4,CLINT1,ARPC4
Tight Junction Signaling	6.37E00	2.1E-01	NaN	MYH10,MYL6,PPP2R2A,PPP2CA,CDK4,CPSF1,SYMPK,CDC42,NFKB1,PRKAG1,CPSF6,CGN,ARHGEF2,PPP2R5C,VCL,ACTC1,CSTF1,TJP2,ACTB,PRKAR2A,NFKB2,ACTG1,MYL1,TJP3,PPP2R1A,PRKAR2B,PRKCI,NUDT21,MYH9,CPSF3,SPTAN1,PPP2R5E,INADL,PPP2R1B,PRKAR1A
Aldosterone Signaling in Epithelial Cells	6.37E00	2.07E-01	NaN	MAPK1,PIK3R1,HSPA6,DNAJC10,DNAJB2,HSPA5,DNAJA1,PIK3R4,HSPA1L,HSPA4,HSP90B1,HSP90AB1,PIK3CG,PIK3C3,MAPK3,PI4KA,AHCY,ATM,PIK3C2B,HSPH1,HSPA9,PLCG1,HSPD1,PLCL2,HSPA2,HSPA8,DNAJC21,PRKCI,PLCG2,DNAJB11,HSP90AA1,NR3C2,PIK3CB,PIK3CD,DNAJC7
CNTF Signaling	6.31E00	3.16E-01	NaN	PIK3C2B,JAK1,MAPK1,GRB2,PIK3R1,RPS6KA3,HRAS,STAT3,PIK3R4,MTOR,MAPK3,PIK3CG,PIK3C3,PIK3CB,PIK3CD,RPS6KA1,STAT1,ATM
Germ Cell-Sertoli Cell Junction Signaling	6.16E00	2.07E-01	NaN	RAC2,MAPK1,PIK3R1,HRAS,MAP3K4,CDC42,TUBB,PIK3R4,IQGAP1,LIMK1,PTK2,RHOG,AGGF1,PIK3CG,PIK3C3,MAPK3,TUBB4A,ACTC1,ATM,PIK3C2B,TUBB3,TUBB4B,ACTB,TUBB2A,TUBA4A,ACTG1,TUBA1B,MAPK14,TUBB6,TUBB8,PIK3CB,PIK3CD,ACTN4,CLINT1,FNBP1
Gap Junction Signaling	6.16E00	1.93E-01	NaN	MAPK1,PIK3R1,HRAS,TUBB,PIK3R4,PRKAG1,PPP3CB,PIK3C3,PIK3CG,MAPK3,PPP3R1,TUBB4A,ACTC1,PPP3CA,ATM,PIK3C2B,TUBB3,GRB2,TUBB4B,ACTB,TUBB2A,TUBA4A,PRKAR2A,PLCG1,PLCL2,ACTG1,TUBA1B,PRKAR2B,PRKCI,TUBB6,TUBB8,PLCG2,PIK3CB,PIK3CD,PRKAR1A
IL-17A Signaling in Airway Cells	6.13E00	2.63E-01	NaN	PIK3C2B,JAK1,MAPK1,NFKBIE,PIK3R1,NFKB2,STAT3,PIK3R4,NFKB1,IKBKB,IKBKG,MAPK14,NFKBIA,PIK3C3,PIK3CG,MAPK3,PIK3CB,PIK3CD,NFKBIB,ATM
FAK Signaling	6.1E00	2.26E-01	NaN	PIK3C2B,MAPK1,CAPN11,GRB2,ACTB,PIK3R1,CSK,HRAS,PLCG1,TLN1,PIK3R4,ACTG1,PTK2,TLN2,CAPNS1,PIK3CG,PLCG2,PIK3C3,MAPK3,PIK3CB,PIK3CD,VCL,ACTC1,ATM
IL-9 Signaling	6.1E00	3.5E-01	NaN	PIK3C2B,JAK1,PIK3R1,STAT3,NFKB2,PIK3R4,NFKB1,PIK3CG,PIK3C3,PIK3CD,PIK3CB,STAT5B,STAT1,ATM
Apoptosis Signaling	6E00	2.4E-01	NaN	TP53,MAPK1,CAPN11,NFKBIE,HRAS,PLCG1,NFKB2,BAX,NFKB1,CDK1,XIAP,IKBKB,IKBKG,CASP12,CAPNS1,NFKBIA,PLCG2,MAPK3,SPTAN1,RPS6KA1,NFKBIB,DIABLO,MAP4K4,AIFM1
PEDF Signaling	5.96E00	2.66E-01	NaN	TP53,PIK3C2B,MAPK1,NFKBIE,PIK3R1,HRAS,NFKB2,PIK3R4,NFKB1,IKBKB,IKBKG,MAPK14,NFKBIA,PIK3C3,PIK3CG,MAPK3,PIK3CB,PIK3CD,WASF2,NFKBIB,ATM
NGF Signaling	5.94E00	2.21E-01	NaN	MAPK1,PIK3R1,RPS6KA3,HRAS,TRIO,MAP3K4,PIK3R4,NFKB1,CDC42,IKBKB,IKBKG,RHOG,PIK3C3,PIK3CG,MAPK3,ATM,TP53,PIK3C2B,GRB2,PLCG1,BAX,NFKB2,RAP1A,PLCG2,PIK3CB,PIK3CD,RPS6KA1
Virus Entry via Endocytic Pathways	5.9E00	2.38E-01	NaN	PIK3C2B,RAC2,FLNB,AP2B1,ACTB,PIK3R1,CLTC,HRAS,PLCG1,PIK3R4,CDC42,ACTG1,PRKCI,HLA-C,FLNA,PIK3CG,PLCG2,PIK3C3,TFRC,PIK3CB,PIK3CD,ACTC1,DNM2,ATM
Thrombopoietin Signaling	5.9E00	2.81E-01	NaN	PIK3C2B,MAPK1,GRB2,PIK3R1,HRAS,PLCG1,STAT3,PIK3R4,PRKCI,PIK3C3,MAPK3,PLCG2,PIK3CG,PIK3CB,PIK3CD,STAT5B,STAT1,ATM
AMPK Signaling	5.76E00	1.71E-01	NaN	MAPK1,PPP2R2A,PPP2CA,PIK3R1,PFKL,PIK3R4,PRKAG1,AK6,MTOR,FASN,PIK3C3,PIK3CG,PRKAA1,PPP2R5C,PPM1A,ATM,PIK3C2B,PRKAR2A,PPM1G,PFKM,PPP2R1A,MAPK14,PRKAR2B,PPM1B,PIK3CB,ACACA,PIK3CD,PPP2R5E,PPP2R1B,PPAT,PRKAR1A
LPS-stimulated MAPK Signaling	5.74E00	2.53E-01	NaN	PIK3C2B,MAPK1,NFKBIE,PIK3R1,HRAS,NFKB2,PIK3R4,NFKB1,CDC42,IKBKB,IKBKG,MAPK14,PRKCI,NFKBIA,PIK3C3,PIK3CG,MAPK3,PIK3CB,PIK3CD,NFKBIB,ATM
Regulation of IL-2 Expression in Activated and Anergic T Lymphocytes	5.72E00	2.47E-01	NaN	SMAD2,CALML5,MAPK1,GRB2,NFKBIE,HRAS,PLCG1,NFKB2,NFATC4,MALT1,NFKB1,IKBKB,IKBKG,NFKBIA,PPP3CB,CARD11,PLCG2,MAPK3,PPP3R1,VAV1,NFKBIB,PPP3CA
Purine Nucleotides De Novo Biosynthesis II	5.71E00	1.9E-01	NaN	ADSL,GMPS,IMPDH2,IMPDH1,PAICS,PFAS,PPAT,GART
FcγRIIB Signaling in B Lymphocytes	5.71E00	2.34E-01	NaN	PIK3C2B,CD79B,GRB2,PIK3R1,HRAS,PIK3R4,INPP5D,BTK,PLCG2,PIK3CG,SYK,PIK3C3,PIK3CB,PIK3CD,ATM
Role of NFAT in Regulation of the Immune Response	5.62E00	1.8E-01	NaN	MAPK1,PIK3R1,NFKBIE,GNB2L1,HLA-DRB1,HRAS,HLA-DQB1,NFKB1,PIK3R4,GNB1,IKBKB,IKBKG,NFKBIA,PPP3CB,PPP3R1,MAPK3,PIK3CG,PIK3C3,HLA-DRA,XPO1,NFKBIB,PPP3CA,ATM,PIK3C2B,CALML5,CD79B,GRB2,PLCG1,NFATC4,NFKB2,BTK,SYK,PLCG2,PIK3CB,IKBKAP,PIK3CD
FLT3 Signaling in Hematopoietic Progenitor Cells	5.53E00	2.66E-01	NaN	PIK3C2B,MAPK1,GRB2,PIK3R1,RPS6KA3,HRAS,STAT3,PIK3R4,EIF4E,INPP5D,MTOR,MAPK14,PIK3C3,PIK3CG,MAPK3,PIK3CB,PIK3CD,RPS6KA1,STAT5B,STAT1,ATM
Myc Mediated Apoptosis Signaling	5.53E00	2.86E-01	NaN	TP53,PIK3C2B,YWHAG,YWHAH,YWHAE,GRB2,YWHAB,PIK3R1,YWHAZ,HRAS,BAX,PIK3R4,YWHAQ,PIK3C3,PIK3CG,PIK3CB,PIK3CD,ATM
Androgen Signaling	5.52E00	1.86E-01	NaN	POLR2D,MAPK1,GNB2L1,GTF2E2,POLR2B,NFKB1,PRKAG1,GNB1,HSPA4,GTF2B,POLR2A,POLR2C,MAPK3,POLR2H,CALR,CALML5,PRKAR2A,GTF2F1,NFKB2,POLR2G,PRKCI,PRKAR2B,POLR2E,GTF2E1,HSP90AA1,POLR2I,PRKAR1A
Insulin Receptor Signaling	5.5E00	2.01E-01	NaN	EIF2B4,JAK1,MAPK1,PIK3R1,HRAS,PPP1CB,PIK3R4,EIF2B2,PRKAG1,EIF4E,MTOR,PIK3CG,INPP5B,PIK3C3,MAPK3,PPP1CA,ATM,PIK3C2B,GRB2,CRKL,PRKAR2A,EIF2B3,ACLY,INPP5D,PRKAR2B,PRKCI,EIF2B1,PIK3CB,PIK3CD,PRKAR1A
Paxillin Signaling	5.38E00	2.14E-01	NaN	PTK2B,MAPK1,PIK3R1,HRAS,TLN1,PIK3R4,CDC42,PTK2,ARFIP2,PIK3C3,PIK3CG,VCL,ACTC1,ATM,PIK3C2B,GRB2,CSK,ACTB,ACTG1,ARF1,TLN2,MAPK14,PIK3CD,PIK3CB,ACTN4
Lymphotoxin β Receptor Signaling	5.35E00	2.74E-01	NaN	PIK3C2B,MAPK1,PIK3R1,NFKB2,PIK3R4,NFKB1,IKBKB,IKBKG,NFKBIA,PIK3CG,PIK3C3,MAPK3,PIK3CB,IKBKAP,PIK3CD,DIABLO,ATM
Role of IL-17A in Arthritis	5.35E00	2.66E-01	NaN	PIK3C2B,MAPK1,NFKBIE,PIK3R1,NFKB2,NFKB1,PIK3R4,NFKBIA,MAPK14,PIK3CG,PIK3C3,MAPK3,PIK3CB,PIK3CD,RPS6KA1,NFKBIB,ATM
Small Cell Lung Cancer Signaling	5.34E00	2.13E-01	NaN	TP53,PIK3C2B,PA2G4,NFKBIE,PIK3R1,CDK4,CDK6,NFKB2,PIK3R4,NFKB1,PTK2,IKBKB,IKBKG,NFKBIA,PIK3C3,PIK3CG,PIK3CB,PIK3CD,NFKBIB,ATM
Regulation of Actin-based Motility by Rho	5.33E00	2.39E-01	NaN	ACTR2,RAC2,PFN1,MYL6,ARPC1B,ARPC5L,ACTB,ARPC5,PPP1CB,WASF1,CDC42,MYL1,LIMK1,MYL12A,RHOG,ACTR3,ARPC2,ARPC3,ACTC1,FNBP1,ARPC4,PI4KA
Gαq Signaling	5.33E00	1.87E-01	NaN	MAPK1,PTK2B,PIK3R1,NFKBIE,GNB2L1,NFKB1,PIK3R4,GNB1,IKBKB,IKBKG,RHOG,NFKBIA,PPP3CB,PPP3R1,PIK3CG,PIK3C3,MAPK3,NFKBIB,PPP3CA,ATM,PIK3C2B,CALML5,CSK,PLCG1,NFKB2,NFATC4,BTK,PRKCI,PLCG2,PIK3CB,PIK3CD,FNBP1
Role of BRCA1 in DNA Damage Response	5.29E00	2.54E-01	NaN	TP53,RPA1,RFC1,BRCC3,RFC5,MLH1,RAD50,FANCD2,MSH2,RFC4,RFC2,MSH6,ATR,STAT1,BLM,FANCA,RFC3,ATM
Renin-Angiotensin Signaling	5.25E00	2.06E-01	NaN	MAPK1,PTK2B,PIK3R1,HRAS,PIK3R4,NFKB1,PRKAG1,PTK2,MAPK3,PIK3CG,PIK3C3,STAT1,ATM,PIK3C2B,GRB2,PRKAR2A,PLCG1,STAT3,NFKB2,PRKCI,MAPK14,PRKAR2B,PLCG2,PIK3CB,PIK3CD,PRKAR1A
Role of p14/p19ARF in Tumor Suppression	5.15E00	3.43E-01	NaN	TP53,NPM1,PIK3C2B,PIK3CG,PIK3R1,PIK3C3,SF3A1,PIK3CB,PIK3CD,PIK3R4,POLR3D,ATM
Role of JAK1 and JAK3 in γc Cytokine Signaling	5.07E00	2.65E-01	NaN	PIK3C2B,JAK1,PTK2B,MAPK1,GRB2,PIK3R1,HRAS,STAT3,PIK3R4,PIK3C3,MAPK3,PIK3CG,SYK,PIK3CB,PIK3CD,STAT5B,STAT1,ATM
Gα12/13 Signaling	5.07E00	2.13E-01	NaN	PTK2B,MYL6,MAPK1,PIK3R1,NFKBIE,HRAS,ARHGEF1,PIK3R4,NFKB1,CDC42,PTK2,IKBKB,IKBKG,NFKBIA,PIK3C3,PIK3CG,MAPK3,NFKBIB,ATM,PIK3C2B,NFKB2,MYL1,BTK,MYL12A,VAV1,PIK3CB,PIK3CD
NF-κB Activation by Viruses	5.04E00	2.41E-01	NaN	PIK3C2B,MAPK1,NFKBIE,PIK3R1,HRAS,NFKB2,PIK3R4,NFKB1,IKBKB,IKBKG,NFKBIA,PRKCI,PIK3C3,PIK3CG,MAPK3,PIK3CB,IKBKAP,PIK3CD,NFKBIB,ATM
CREB Signaling in Neurons	4.96E00	1.69E-01	NaN	POLR2D,MAPK1,PIK3R1,GNB2L1,HRAS,POLR2B,PIK3R4,PRKAG1,GNB1,GTF2B,POLR2C,CAMK2D,POLR2A,MAPK3,PIK3CG,PIK3C3,POLR2H,ATM,PIK3C2B,CALML5,GRB2,PRKAR2A,PLCG1,PLCL2,POLR2G,PRKAR2B,PRKCI,POLR2E,PLCG2,PIK3CB,PIK3CD,RPS6KA1,POLR2I,PRKAR1A,CAMK2G
Renal Cell Carcinoma Signaling	4.85E00	2.41E-01	NaN	ETS1,PIK3C2B,MAPK1,GRB2,PIK3R1,HRAS,TCEB2,PIK3R4,CDC42,RAP1A,TCEB1,CUL2,PIK3C3,PIK3CG,RBX1,MAPK3,PIK3CB,PIK3CD,ATM
Glioma Signaling	4.83E00	2.04E-01	NaN	TP53,PIK3C2B,CALML5,PA2G4,MAPK1,GRB2,PIK3R1,CDK4,CDK6,HRAS,PLCG1,PIK3R4,MTOR,PRKCI,CAMK2D,PIK3C3,PIK3CG,PLCG2,MAPK3,PIK3CB,PIK3CD,ATM,CAMK2G
UVB-Induced MAPK Signaling	4.81E00	2.76E-01	NaN	TP53,PIK3C2B,MAPK1,PIK3R1,RPS6KA3,PIK3R4,EIF4E,MTOR,PRKCI,MAPK14,MAPK3,PIK3CG,PIK3C3,PIK3CB,PIK3CD,ATM
Non-Small Cell Lung Cancer Signaling	4.76E00	2.17E-01	NaN	TP53,PIK3C2B,PA2G4,MAPK1,GRB2,PIK3R1,CDK6,CDK4,HRAS,PLCG1,PIK3R4,STK4,MAPK3,PIK3C3,PIK3CG,PIK3CB,PIK3CD,ATM
Role of PI3K/AKT Signaling in the Pathogenesis of Influenza	4.76E00	2.37E-01	NaN	KPNA3,PIK3C2B,MAPK1,NFKBIE,CRKL,PIK3R1,NFKB2,PIK3R4,NFKB1,MLH1,NFKBIA,MAPK3,PIK3C3,PIK3CG,PIK3CB,PIK3CD,NFKBIB,ATM
IL-6 Signaling	4.74E00	2.1E-01	NaN	MAPK1,NFKBIE,PIK3R1,HRAS,PIK3R4,NFKB1,IKBKB,IKBKG,NFKBIA,MAPK3,PIK3CG,PIK3C3,CSNK2A1,CSNK2B,NFKBIB,TAB1,ATM,PIK3C2B,GRB2,STAT3,NFKB2,CSNK2A2,MAPK14,PIK3CB,PIK3CD,MAP4K4
Cardiac Hypertrophy Signaling	4.67E00	1.64E-01	NaN	EIF2B4,MAPK1,MYL6,PIK3R1,GNB2L1,HRAS,MAP3K4,PIK3R4,EIF2B2,PRKAG1,EIF4E,GNB1,MTOR,RHOG,PPP3CB,PPP3R1,MAPK3,PIK3CG,PIK3C3,TAB1,PPP3CA,ATM,PIK3C2B,CALML5,GRB2,PRKAR2A,EIF2B3,PLCG1,PLCL2,NFATC4,MYL1,MYL12A,PRKAR2B,MAPK14,PLCG2,EIF2B1,PIK3CB,PIK3CD,RPS6KA1,FNBP1,PRKAR1A
eNOS Signaling	4.64E00	1.81E-01	NaN	PIK3R1,HSPA6,PIK3R4,HSPA5,PRKAG1,HSPA1L,HSPA4,HSP90B1,HSP90AB1,STUB1,PIK3C3,PIK3CG,PRKAA1,DNM2,ATM,PIK3C2B,CALML5,HSPA9,PRKAR2A,PLCG1,HSPA2,HSPA8,PRKAR2B,PLCG2,HSP90AA1,PIK3CB,PIK3CD,PRKAR1A
iNOS Signaling	4.57E00	2.64E-01	NaN	CALML5,JAK1,MAPK1,NFKBIE,NFKB2,NFKB1,IRAK1,IKBKB,IKBKG,NFKBIA,MAPK14,NFKBIB,STAT1,TAB1
IL-4 Signaling	4.48E00	2.38E-01	NaN	PIK3C2B,JAK1,GRB2,PIK3R1,HRAS,HLA-DRB1,NFATC4,HLA-DQB1,PIK3R4,INPP5D,MTOR,PIK3CG,INPP5B,PIK3C3,HLA-DRA,PIK3CB,NR3C2,PIK3CD,ATM
PPARα/RXRα Activation	4.46E00	1.7E-01	NaN	MAPK1,NFKBIE,HRAS,NFKB1,PRKAG1,IKBKB,IKBKG,HSP90B1,NFKBIA,HSP90AB1,FASN,MAPK3,PRKAA1,NCOR1,STAT5B,NFKBIB,SMAD2,GRB2,ACOX1,CKAP5,PRKAR2A,PLCG1,NFKB2,PLCL2,TGS1,AIP,CAND1,PRKAR2B,MAPK14,PLCG2,HSP90AA1,NCOR2,MAP4K4,PRKAR1A
Estrogen Receptor Signaling	4.46E00	1.99E-01	NaN	POLR2D,MAPK1,GTF2F2,HRAS,POLR2B,CTBP1,GTF2B,DDX5,POLR2C,POLR2A,MAPK3,POLR2H,NCOR1,PRKDC,MED20,GRB2,MED30,GTF2F1,HNRNPD,POLR2G,POLR2E,GTF2E1,NCOR2,POLR2I,MED4,CARM1,TAF15
Leptin Signaling in Obesity	4.39E00	2.24E-01	NaN	PIK3C2B,MAPK1,GRB2,PIK3R1,PRKAR2A,PLCG1,PLCL2,STAT3,PIK3R4,PRKAG1,PRKAR2B,PIK3C3,PIK3CG,PLCG2,MAPK3,PIK3CB,PIK3CD,PRKAR1A,ATM
Growth Hormone Signaling	4.37E00	2.31E-01	NaN	PIK3C2B,MAPK1,PIK3R1,RPS6KA3,PLCG1,STAT3,PIK3R4,PRKCI,MAPK3,PLCG2,PIK3CG,PIK3C3,PIK3CB,PIK3CD,RPS6KA1,STAT5B,STAT1,ATM
ILK Signaling	4.33E00	1.71E-01	NaN	MYH10,FLNB,MAPK1,MYL6,PPP2R2A,PPP2CA,PIK3R1,CDC42,RICTOR,NFKB1,PIK3R4,PTK2,MTOR,RHOG,FLNA,MAPK3,PIK3CG,PIK3C3,PPP2R5C,ACTC1,NACA,ATM,PIK3C2B,ACTB,NFKB2,ACTG1,MYL1,PPP2R1A,MYH9,PIK3CB,PIK3CD,PPP2R5E,ACTN4,PPP2R1B,FNBP1
Acute Myeloid Leukemia Signaling	4.22E00	2.26E-01	NaN	PIK3C2B,MAPK1,GRB2,PIK3R1,HRAS,NFKB2,STAT3,PIK3R4,NFKB1,MTOR,ARAF,PIK3C3,PIK3CG,MAPK3,PIK3CB,PIK3CD,PML,STAT5B,ATM
4-1BB Signaling in T Lymphocytes	4.2E00	3.06E-01	NaN	IKBKB,IKBKG,MAPK14,NFKBIA,MAPK1,MAPK3,NFKBIE,IKBKAP,NFKB2,NFKBIB,NFKB1
Melanoma Signaling	4.14E00	2.6E-01	NaN	TP53,PIK3C2B,MAPK1,MAPK3,PIK3C3,PIK3CG,PIK3R1,CDK4,HRAS,PIK3CB,PIK3CD,PIK3R4,ATM
UVA-Induced MAPK Signaling	4.14E00	2.14E-01	NaN	TP53,PIK3C2B,MAPK1,PIK3R1,PARP4,RPS6KA3,HRAS,PLCG1,PLCL2,PIK3R4,MTOR,MAPK14,PIK3C3,PIK3CG,PLCG2,MAPK3,PIK3CB,PIK3CD,RPS6KA1,STAT1,ATM
ErbB4 Signaling	4.08E00	2.32E-01	NaN	PIK3C2B,MAPK1,GRB2,PIK3R1,HRAS,PLCG1,NCSTN,PIK3R4,PRKCI,MAPK3,PLCG2,PIK3CG,PIK3C3,PIK3CB,PIK3CD,ATM
Dendritic Cell Maturation	4.03E00	1.56E-01	NaN	ICAM1,MAPK1,PIK3R1,NFKBIE,HLA-DRB1,HLA-DQB1,NFKB1,PIK3R4,IKBKB,IKBKG,NFKBIA,MAPK3,PIK3CG,HLA-DRB3,PIK3C3,HLA-DRA,COL11A2,STAT1,NFKBIB,TAB1,ATM,PIK3C2B,PLCG1,PLCL2,NFKB2,HLA-DRB4,MAPK14,HLA-C,PLCG2,PIK3CB,PIK3CD,IRF8,COL3A1
Prolactin Signaling	4.03E00	2.14E-01	NaN	PIK3C2B,MAPK1,GRB2,PIK3R1,HRAS,PLCG1,STAT3,PIK3R4,PRKCI,PIK3C3,MAPK3,PLCG2,PIK3CG,PIK3CB,PIK3CD,STAT5B,STAT1,ATM
Melanocyte Development and Pigmentation Signaling	4.02E00	2.11E-01	NaN	PIK3C2B,MAPK1,GRB2,PIK3R1,RPS6KA3,PRKAR2A,HRAS,PLCG1,PIK3R4,PRKAG1,PRKAR2B,PIK3C3,PIK3CG,PLCG2,MAPK3,PIK3CB,PIK3CD,RPS6KA1,PRKAR1A,ATM
Tec Kinase Signaling	4.02E00	1.63E-01	NaN	JAK1,PTK2B,PIK3R1,GTF2I,GNB2L1,NFKB1,PIK3R4,GNB1,BLK,PTK2,RHOG,PIK3CG,PIK3C3,STAT1,STAT5B,ACTC1,ATM,PIK3C2B,ACTB,PLCG1,STAT3,NFKB2,ACTG1,BTK,PRKCI,PLCG2,PIK3CB,VAV1,PIK3CD,FNBP1
JAK/Stat Signaling	4E00	2.39E-01	NaN	PIK3C2B,JAK1,MAPK1,GRB2,PIK3R1,HRAS,STAT3,PIK3R4,MTOR,MAPK3,PIK3CG,PIK3C3,PIK3CB,PIK3CD,STAT5B,STAT1,ATM
Ceramide Signaling	3.98E00	2.09E-01	NaN	PIK3C2B,PPP2CA,PPP2R2A,PIK3R1,HRAS,NFKB2,PIK3R4,NFKB1,PPP2R1A,PIK3CG,PIK3C3,MAPK3,PIK3CB,PPP2R5C,PIK3CD,PPP2R5E,DIABLO,PPP2R1B,ATM
HGF Signaling	3.98E00	1.98E-01	NaN	ETS1,PIK3C2B,MAPK1,GRB2,CRKL,PIK3R1,HRAS,PLCG1,MAP3K4,STAT3,PIK3R4,CDC42,RAP1A,PTK2,PRKCI,PIK3C3,PIK3CG,PLCG2,MAPK3,PIK3CB,PIK3CD,ATM
IL-8 Signaling	3.96E00	1.51E-01	NaN	RAC2,ICAM1,MAPK1,PTK2B,PIK3R1,GNB2L1,HRAS,NFKB1,PIK3R4,IQGAP1,LIMK1,IRAK1,PTK2,GNB1,IKBKB,MTOR,IKBKG,RHOG,CCND3,MAPK3,PIK3CG,PIK3C3,NFKBIB,LASP1,ATM,PIK3C2B,BAX,CSTB,PRKCI,ARAF,PIK3CB,PIK3CD,MAP4K4,FNBP1
Cell Cycle: G2/M DNA Damage Checkpoint Regulation	3.91E00	2.65E-01	NaN	YWHAQ,TP53,PRKDC,YWHAG,YWHAH,YWHAE,YWHAB,YWHAZ,ATR,RPS6KA1,SKP1,CDK1,ATM
TNFR2 Signaling	3.89E00	2.94E-01	NaN	TANK,IKBKB,IKBKG,NFKBIA,NFKBIE,TBK1,NFKB2,NFKBIB,NFKB1,XIAP
Cell Cycle Control of Chromosomal Replication	3.89E00	2.94E-01	NaN	MCM5,MCM3,MCM6,MCM2,CDK6,CDK4,RPA1,MCM4,MCM7,RPA2
CTLA4 Signaling in Cytotoxic T Lymphocytes	3.87E00	2.08E-01	NaN	PIK3C2B,AP2B1,PPP2R2A,GRB2,PPP2CA,PIK3R1,CLTC,PLCG1,PIK3R4,PPP2R1A,HLA-C,PIK3C3,SYK,PIK3CG,PPP2R5C,PIK3CB,PIK3CD,PPP2R5E,PPP2R1B,ATM
Role of NFAT in Cardiac Hypertrophy	3.84E00	1.58E-01	NaN	MAPK1,PIK3R1,GNB2L1,HRAS,PIK3R4,PRKAG1,GNB1,HDAC6,CAMK2D,PPP3CB,MAPK3,PPP3R1,PIK3CG,PIK3C3,PPP3CA,ATM,PIK3C2B,CALML5,HDAC2,GRB2,HDAC1,PRKAR2A,PLCG1,PLCL2,NFATC4,PRKAR2B,MAPK14,PRKCI,PLCG2,PIK3CB,PIK3CD,CAMK2G,PRKAR1A
Estrogen-Dependent Breast Cancer Signaling	3.81E00	2.19E-01	NaN	HSD17B10,PIK3C2B,MAPK1,PIK3R1,HRAS,NFKB2,PIK3R4,NFKB1,HSD17B8,PIK3CG,PIK3C3,MAPK3,PIK3CB,PIK3CD,STAT5B,ATM
Role of Tissue Factor in Cancer	3.71E00	1.77E-01	NaN	TP53,PIK3C2B,P4HB,PTK2B,MAPK1,PIK3R1,RPS6KA3,HRAS,PIK3R4,CDC42,EIF4E,LIMK1,BLK,MTOR,MAPK14,PIK3C3,PIK3CG,MAPK3,PIK3CB,PIK3CD,RPS6KA1,STAT5B,ATM
Glioma Invasiveness Signaling	3.7E00	2.27E-01	NaN	PIK3C2B,MAPK1,VTN,PIK3R1,HRAS,PIK3R4,PTK2,RHOG,PIK3CG,PIK3C3,MAPK3,PIK3CB,PIK3CD,FNBP1,ATM
Endometrial Cancer Signaling	3.69E00	2.33E-01	NaN	TP53,PIK3C2B,MAPK1,GRB2,PIK3R1,HRAS,PIK3R4,MLH1,PIK3CG,PIK3C3,MAPK3,PIK3CB,PIK3CD,ATM
Nucleotide Excision Repair Pathway	3.65E00	3.06E-01	NaN	POLR2G,POLR2A,POLR2D,POLR2C,POLR2E,POLR2H,RPA1,POLR2B,POLR2I,RAD23B,RPA2
p53 Signaling	3.65E00	1.86E-01	NaN	TP53,PRKDC,PIK3C2B,PIK3R1,RRM2B,HDAC1,CDK4,BAX,PIK3R4,ST13,PCNA,MAPK14,PIK3C3,PIK3CG,SIRT1,PIK3CB,ATR,GNL3,PIK3CD,PML,ATM
DNA Methylation and Transcriptional Repression Signaling	3.6E00	3.48E-01	NaN	HDAC2,CHD4,MBD3,HDAC1,RBBP7,MTA2,DNMT1,RBBP4
GADD45 Signaling	3.6E00	3.33E-01	NaN	TP53,PCNA,CCND3,CDK4,ATR,MAP3K4,CDK1,ATM
Molecular Mechanisms of Cancer	3.56E00	1.34E-01	NaN	RAC2,JAK1,MAPK1,PIK3R1,NCSTN,HRAS,ARHGEF1,PIK3R4,PTK2,RHOG,CAMK2D,CCND3,MAPK3,PIK3CG,NFKBIB,TAB1,ATM,TP53,PIK3C2B,SMAD2,CDK6,NFKB2,RAP1A,PIK3CD,ARHGEF18,DIABLO,FNBP1,CAMK2G,RALA,PA2G4,NFKBIE,CDK4,CDC42,NFKB1,PRKAG1,NFKBIA,FANCD2,PIK3C3,ARHGEF2,PRKDC,HAT1,GRB2,PRKAR2A,BAX,XIAP,PRKAR2B,MAPK14,PRKCI,NF1,ATR,PIK3CB,PRKAR1A
NF-κB Signaling	3.55E00	1.71E-01	NaN	PIK3R1,NFKBIE,HRAS,PIK3R4,NFKB1,IRAK1,TANK,IKBKB,TNIP1,IKBKG,NFKBIA,PIK3C3,PIK3CG,CSNK2A1,CSNK2B,NFKBIB,TAB1,ATM,PIK3C2B,HDAC2,HDAC1,TBK1,MALT1,NFKB2,CSNK2A2,ARAF,CARD11,PLCG2,PIK3CB,PIK3CD,MAP4K4
HMGB1 Signaling	3.53E00	1.83E-01	NaN	PIK3C2B,ICAM1,MAPK1,HAT1,PIK3R1,RBBP7,HRAS,NFKB2,PIK3R4,NFKB1,CDC42,MAPK14,RHOG,PIK3C3,PIK3CG,MAPK3,PIK3CB,PIK3CD,FNBP1,ATM
Pancreatic Adenocarcinoma Signaling	3.53E00	1.72E-01	NaN	TP53,SMAD2,PIK3C2B,RALA,JAK1,PA2G4,MAPK1,GRB2,PIK3R1,CDK4,NFKB2,STAT3,CDC42,NFKB1,PIK3R4,PIK3C3,PIK3CG,MAPK3,PIK3CB,PIK3CD,STAT1,ATM
Methionine Degradation I (to Homocysteine)	3.5E00	2.92E-01	NaN	PRMT3,PRMT5,AHCYL2,MAT2B,MAT2A,PRMT1,AHCY
Cyclins and Cell Cycle Regulation	3.49E00	1.88E-01	NaN	TP53,PA2G4,HDAC2,PPP2CA,PPP2R2A,HDAC1,CDK6,CDK4,SKP1,CDK1,HDAC6,PPP2R1A,CCND3,PPP2R5C,ATR,PPP2R5E,PPP2R1B,ATM
PPAR Signaling	3.47E00	1.87E-01	NaN	MAPK1,GRB2,NFKBIE,HRAS,NFKB2,NFKB1,AIP,IKBKB,HSP90B1,IKBKG,NFKBIA,HSP90AB1,MAPK3,HSP90AA1,NCOR1,NCOR2,NFKBIB,STAT5B,MAP4K4,TAB1
Tetrahydrofolate Salvage from 5,10-methenyltetrahydrofolate	3.46E00	4E-01	NaN	MTHFD1L,MTHFD2,MTHFD1,GART
Caveolar-mediated Endocytosis Signaling	3.44E00	2E-01	NaN	FLNB,COPZ1,ARCN1,RAB5C,ACTB,COPA,COPE,COPG2,COPB2,COPB1,ACTG1,COPG1,ALB,HLA-C,FLNA,ACTC1,DNM2
Thrombin Signaling	3.44E00	1.56E-01	NaN	MAPK1,MYL6,PIK3R1,GNB2L1,HRAS,PPP1CB,ARHGEF1,NFKB1,PIK3R4,GNB1,PTK2,IKBKB,CAMK2D,RHOG,PIK3CG,PIK3C3,MAPK3,ARHGEF2,ATM,PIK3C2B,GRB2,PLCG1,PLCL2,NFKB2,MYL1,MYL12A,MAPK14,PRKCI,PLCG2,PIK3CB,PIK3CD,FNBP1,CAMK2G
Type II Diabetes Mellitus Signaling	3.42E00	1.35E-01	NaN	PIK3C2B,ACSL3,MAPK1,NFKBIE,PIK3R1,PKM,NFKB2,PIK3R4,NFKB1,PRKAG1,IKBKB,MTOR,IKBKG,PRKCI,NFKBIA,PIK3C3,PIK3CG,MAPK3,PRKAA1,PIK3CB,PIK3CD,NFKBIB,ATM
Antigen Presentation Pathway	3.42E00	2.62E-01	NaN	PSMB9,CALR,HLA-DRB4,PSMB5,HLA-C,HLA-DRB3,HLA-DRA,HLA-DRB1,CANX,PSMB8,PSMB6
Fc Epsilon RI Signaling	3.41E00	1.88E-01	NaN	PIK3C2B,RAC2,MAPK1,GRB2,PIK3R1,HRAS,PLCG1,PIK3R4,INPP5D,BTK,MAPK14,PRKCI,SYK,PIK3CG,PLCG2,INPP5B,PIK3C3,MAPK3,VAV1,PIK3CB,PIK3CD,ATM
PAK Signaling	3.41E00	1.73E-01	NaN	PIK3C2B,PTK2B,MYL6,MAPK1,GRB2,PIK3R1,HRAS,PIK3R4,CDC42,MYL1,LIMK1,PTK2,MYL12A,PIK3C3,PIK3CG,MAPK3,PIK3CB,PIK3CD,ATM
Cdc42 Signaling	3.4E00	1.56E-01	NaN	RALA,ARPC1B,MAPK1,MYL6,ARPC5,HLA-DRB1,PPP1CB,HLA-DQB1,CDC42,IQGAP1,LIMK1,DIAPH1,ACTR3,HLA-DRB3,HLA-DRA,ARPC3,EXOC1,ACTR2,ARPC5L,MYL1,MYL12A,PRKCI,MAPK14,HLA-DRB4,EXOC4,HLA-C,ARPC2,VAV1,ARPC4
Macropinocytosis Signaling	3.4E00	2.08E-01	NaN	PIK3C2B,PIK3R1,ANKFY1,HRAS,PLCG1,PIK3R4,CDC42,PRKCI,ABI1,PLCG2,PIK3CG,PIK3C3,PIK3CB,PIK3CD,ACTN4,ATM
Axonal Guidance Signaling	3.39E00	1.27E-01	NaN	DPYSL2,KLC1,RAC2,PFN1,MYL6,MAPK1,PIK3R1,ARPC5,GNB2L1,HRAS,BRCC3,PIK3R4,TUBB,LIMK1,GNB1,PTK2,MAPK3,PIK3CG,PPP3R1,ATM,PIK3C2B,ACTR2,TUBB3,CRKL,COPS5,TUBB2A,PLCL2,RAP1A,TUBA1B,MYL12A,PLCG2,ARPC2,PIK3CD,ARPC1B,CDC42,EIF4E,PRKAG1,ACTR3,PPP3CB,PIK3C3,ARPC3,PSMD14,TUBB4A,PPP3CA,EPHB4,TUBB4B,ARPC5L,GRB2,CXCR4,PRKAR2A,TUBA4A,PLCG1,NFATC4,PLXND1,MYL1,PRKAR2B,PRKCI,TUBB6,TUBB8,PIK3CB,ARPC4,PRKAR1A
Protein Kinase A Signaling	3.38E00	1.37E-01	NaN	MYH10,YWHAH,MAPK1,MYL6,PDE12,GNB2L1,PTK2,YWHAQ,PTPRC,GNB1,CAMK2D,MAPK3,PPP3R1,RYR3,PPP1CA,NFKBIB,HIST1H1B,PTPRE,YWHAG,YWHAE,YWHAB,YWHAZ,NFKB2,PLCL2,ANAPC7,RAP1A,EPM2A,AKAP13,MYL12A,PLCG2,HIST1H1D,CAMK2G,HIST1H1C,FLNB,PTK2B,AKAP8,NFKBIE,PPP1CB,NFKB1,ANAPC1,PRKAG1,NFKBIA,PPP3CB,FLNA,PPP3CA,CALML5,PRKAR2A,PLCG1,PYGB,NFATC4,MYL1,PRKAR2B,PRKCI,ADD1,AKAP9,PRKAR1A
HIF1α Signaling	3.34E00	1.88E-01	NaN	TP53,PIK3C2B,MAPK1,COPS5,PIK3R1,HRAS,TCEB2,PIK3R4,TCEB1,LDHB,MAPK14,CUL2,PIK3C3,PIK3CG,RBX1,MAPK3,HSP90AA1,PIK3CB,PIK3CD,LDHA,ATM
Actin Nucleation by ARP-WASP Complex	3.33E00	2.09E-01	NaN	ACTR2,ARPC1B,ARPC5L,GRB2,ARPC5,HRAS,WASF1,CDC42,ACTR3,RHOG,ARPC2,ARPC3,ARPC4,FNBP1
Assembly of RNA Polymerase II Complex	3.3E00	2.32E-01	NaN	POLR2G,GTF2B,POLR2C,POLR2A,POLR2D,POLR2E,GTF2E1,POLR2H,GTF2E2,GTF2F1,POLR2B,POLR2I,TAF15
ErbB2-ErbB3 Signaling	3.24E00	2.22E-01	NaN	PIK3C2B,MAPK1,GRB2,PIK3R1,HRAS,STAT3,PIK3R4,PIK3CG,PIK3C3,MAPK3,PIK3CD,PIK3CB,STAT5B,ATM
Regulation of Cellular Mechanics by Calpain Protease	3.24E00	1.92E-01	NaN	CAPN11,MAPK1,GRB2,CDK6,CDK4,HRAS,TLN1,CDK1,PTK2,TLN2,CAPNS1,MAPK3,VCL,ACTN4
Amyloid Processing	3.21E00	2.13E-01	NaN	CSNK2A2,CAPNS1,PRKAR2B,MAPK14,CAPN11,MAPK1,MAPK3,CSNK2A1,PRKAR2A,NCSTN,CSNK2B,PRKAG1,PRKAR1A
Leukocyte Extravasation Signaling	3.15E00	1.57E-01	NaN	RAC2,ICAM1,MAPK1,MYL6,PTK2B,PIK3R1,MAP3K4,CDC42,PIK3R4,PTK2,PIK3C3,PIK3CG,VCL,ACTC1,ATM,PIK3C2B,CXCR4,ACTB,CRKL,ARHGAP4,PLCG1,RAP1A,ACTG1,BTK,MAPK14,PRKCI,PLCG2,PIK3CB,VAV1,PIK3CD,ACTN4,ARHGAP1,CTTN
ErbB Signaling	3.15E00	2E-01	NaN	PIK3C2B,MAPK1,GRB2,PIK3R1,HRAS,PLCG1,PIK3R4,CDC42,MTOR,PRKCI,MAPK14,PIK3C3,PIK3CG,PLCG2,MAPK3,PIK3CB,PIK3CD,ATM
Cysteine Biosynthesis III (mammalia)	3.12E00	2.26E-01	NaN	PRMT3,PRMT5,AHCYL2,MAT2B,MAT2A,PRMT1,AHCY
Neuropathic Pain Signaling In Dorsal Horn Neurons	3.1E00	1.83E-01	NaN	PIK3C2B,MAPK1,PIK3R1,PRKAR2A,PLCG1,PLCL2,PIK3R4,PRKAG1,CAMK2D,PRKCI,PRKAR2B,PIK3C3,PIK3CG,PLCG2,MAPK3,PIK3CB,PIK3CD,PRKAR1A,ATM,CAMK2G
Role of PKR in Interferon Induction and Antiviral Response	3.1E00	2.24E-01	NaN	TP53,IKBKB,IKBKG,MAPK14,NFKBIA,NFKBIE,NFKB2,STAT1,EIF2S1,NFKBIB,NFKB1
B Cell Activating Factor Signaling	3.1E00	2.39E-01	NaN	IKBKB,IKBKG,MAPK14,NFKBIA,MAPK1,NFKBIE,IKBKAP,NFATC4,NFKB2,NFKBIB,NFKB1
P2Y Purigenic Receptor Signaling Pathway	3.1E00	1.6E-01	NaN	PIK3C2B,MAPK1,PIK3R1,GNB2L1,PRKAR2A,HRAS,PLCG1,NFKB2,PLCL2,PIK3R4,NFKB1,PRKAG1,GNB1,PRKAR2B,PRKCI,PIK3C3,PIK3CG,PLCG2,MAPK3,PIK3CB,PIK3CD,PRKAR1A,ATM
5-aminoimidazole Ribonucleotide Biosynthesis I	3.1E00	1.67E-01	NaN	PFAS,PPAT,GART
Oxidized GTP and dGTP Detoxification	3.1E00	2.73E-01	NaN	DDX6,RUVBL2,NUDT1
Nitric Oxide Signaling in the Cardiovascular System	3.04E00	1.6E-01	NaN	PIK3C2B,CALML5,MAPK1,PIK3R1,PRKAR2A,PIK3R4,PRKAG1,HSP90B1,PRKCI,PRKAR2B,HSP90AB1,PIK3C3,PIK3CG,MAPK3,PRKAA1,HSP90AA1,PIK3CB,PIK3CD,PRKAR1A,ATM
Sertoli Cell-Sertoli Cell Junction Signaling	3.04E00	1.52E-01	NaN	MAPK1,HRAS,SYMPK,MAP3K4,TUBB,CDC42,PRKAG1,AGGF1,MAPK3,CGN,TUBB4A,ACTC1,TUBB3,TJP2,TUBB4B,ACTB,TUBB2A,TUBA4A,PRKAR2A,ACTG1,TUBA1B,TJP3,MAPK14,PRKAR2B,TUBB6,TUBB8,SPTAN1,ACTN4,CLINT1,PRKAR1A
IL-17A Signaling in Fibroblasts	3.01E00	2.5E-01	NaN	IKBKB,IKBKG,MAPK14,NFKBIA,MAPK1,MAPK3,NFKBIE,NFKB2,NFKBIB,NFKB1
ATM Signaling	3E00	2.12E-01	NaN	TP53,SMC3,TRIM28,CDK1,RAD50,SMC1A,NFKBIA,MAPK14,BRAT1,SMC2,FANCD2,TP53BP1,BLM,ATM
DNA Double-Strand Break Repair by Non-Homologous End Joining	3E00	3E-01	NaN	PRKDC,WRN,XRCC6,XRCC5,RAD50,ATM
SAPK/JNK Signaling	2.98E00	1.81E-01	NaN	TP53,RAC2,PIK3C2B,GRB2,CRKL,PIK3R1,HRAS,MAP3K4,PIK3R4,CDC42,HNRNPK,GNB1,PIK3C3,PIK3CG,PIK3CB,PIK3CD,MAP4K4,TAB1,ATM
Ephrin B Signaling	2.97E00	1.95E-01	NaN	RAC2,EPHB4,MAPK1,CXCR4,GNB2L1,HRAS,CDC42,HNRNPK,LIMK1,PTK2,GNB1,ABI1,MAPK3,ITSN2,CAP1,VAV1
Aryl Hydrocarbon Receptor Signaling	2.96E00	1.46E-01	NaN	MAPK1,NQO2,POLA1,CDK4,NFKB1,HSP90B1,CCND3,HSP90AB1,MAPK3,GSTK1,ATM,TP53,ALDH1B1,CDK6,BAX,NFKB2,ALDH9A1,AIP,HSP90AA1,ALDH18A1,ATR,NCOR2,ALDH16A1,GSTP1,MCM7
Folate Transformations I	2.93E00	1.52E-01	NaN	MTHFD1L,MTHFD2,MTR,MTHFD1,SHMT2
Ephrin A Signaling	2.93E00	2.22E-01	NaN	PTK2,PIK3C2B,PIK3CG,PIK3R1,PIK3C3,VAV1,PIK3CB,PIK3CD,CDC42,PIK3R4,LIMK1,ATM
Role of Pattern Recognition Receptors in Recognition of Bacteria and Viruses	2.92E00	1.74E-01	NaN	PIK3C2B,MAPK1,OAS2,PIK3R1,NFKB2,PIK3R4,NFKB1,EIF2S1,PRKCI,TICAM1,PIK3C3,SYK,PIK3CG,MAPK3,PLCG2,DDX58,PIK3CB,PIK3CD,ATM
GDNF Family Ligand-Receptor Interactions	2.91E00	1.97E-01	NaN	PIK3C2B,MAPK1,GRB2,PIK3R1,HRAS,PLCG1,CDC42,PIK3R4,PLCG2,PIK3CG,PIK3C3,MAPK3,PIK3CB,PIK3CD,ATM
Neurotrophin/TRK Signaling	2.91E00	1.97E-01	NaN	PIK3C2B,MAPK1,GRB2,PIK3R1,HRAS,PLCG1,CDC42,PIK3R4,PIK3CG,PIK3C3,MAPK3,PIK3CB,PIK3CD,RPS6KA1,ATM
Xenobiotic Metabolism Signaling	2.89E00	1.42E-01	NaN	FTL,MAPK1,PPP2R2A,PPP2CA,PIK3R1,NQO2,HRAS,MAP3K4,NFKB1,PIK3R4,CUL3,HSP90B1,CAMK2D,HSP90AB1,MAPK3,PIK3CG,PIK3C3,PPP2R5C,GSTK1,ATM,PIK3C2B,ALDH1B1,NFKB2,ALDH9A1,AIP,PPP2R1A,MAPK14,PRKCI,RBX1,CAT,HSP90AA1,PIK3CB,ALDH18A1,PIK3CD,NCOR2,PPP2R5E,ALDH16A1,PPP2R1B,DNAJC7,GSTP1,CAMK2G
Chemokine Signaling	2.84E00	2E-01	NaN	CALML5,PTK2B,MAPK1,CXCR4,PPP1CB,PLCG1,HRAS,LIMK1,PTK2,CAMK2D,MAPK14,MAPK3,PIK3CG,PLCG2,CAMK2G
Superpathway of Methionine Degradation	2.81E00	1.38E-01	NaN	PRMT3,PRMT5,DLD,MTR,AHCYL2,MAT2B,MAT2A,PRMT1,AHCY
Activation of IRF by Cytosolic Pattern Recognition Receptors	2.78E00	1.89E-01	NaN	PPIB,NFKBIE,TBK1,NFKB2,ADAR,NFKB1,TANK,IKBKB,IKBKG,NFKBIA,DDX58,IKBKAP,STAT1,NFKBIB
Role of RIG1-like Receptors in Antiviral Innate Immunity	2.73E00	2.24E-01	NaN	TANK,IKBKB,IKBKG,NFKBIA,NFKBIE,DDX58,TBK1,NFKB2,NFKBIB,NFKB1,TRIM25
April Mediated Signaling	2.71E00	2.27E-01	NaN	IKBKB,IKBKG,MAPK14,NFKBIA,MAPK1,NFKBIE,NFATC4,NFKB2,NFKBIB,NFKB1
MSP-RON Signaling Pathway	2.64E00	2.16E-01	NaN	PIK3C2B,PIK3CG,PIK3R1,PIK3C3,ACTB,PIK3CB,PIK3CD,PIK3R4,ACTC1,ACTG1,ATM
Netrin Signaling	2.62E00	1.72E-01	NaN	RAC2,PRKAR2B,PPP3CB,PPP3R1,RYR3,PRKAR2A,NFATC4,PRKAG1,PPP3CA,PRKAR1A
PTEN Signaling	2.61E00	1.52E-01	NaN	RAC2,YWHAH,MAPK1,GRB2,PIK3R1,HRAS,NFKB2,NFKB1,CDC42,INPP5D,PTK2,CSNK2A2,IKBKB,IKBKG,PIK3CG,INPP5B,MAPK3,CSNK2A1,PIK3CB,PIK3CD,CSNK2B
Induction of Apoptosis by HIV1	2.59E00	1.94E-01	NaN	TP53,IKBKB,IKBKG,NFKBIA,CXCR4,NFKBIE,IKBKAP,BAX,NFKB2,NFKBIB,NFKB1,DIABLO,XIAP
Cell Cycle: G1/S Checkpoint Regulation	2.58E00	1.94E-01	NaN	TP53,RPL11,PA2G4,HDAC2,HDAC1,CDK6,CDK4,SKP1,HDAC6,RPL5,CCND3,GNL3,ATR,ATM
Hypoxia Signaling in the Cardiovascular System	2.58E00	2.06E-01	NaN	TP53,P4HB,NFKBIE,COPS5,HSP90B1,NFKBIA,HSP90AB1,HIF1AN,HSP90AA1,CDC34,NFKBIB,LDHA,UBE2C,ATM
Ovarian Cancer Signaling	2.58E00	1.51E-01	NaN	TP53,PIK3C2B,PMS2,PA2G4,MAPK1,PIK3R1,CDK4,PRKAR2A,HRAS,PIK3R4,PRKAG1,MLH1,MTOR,PRKAR2B,MSH2,PIK3C3,PIK3CG,MAPK3,MSH6,PIK3CB,PIK3CD,PRKAR1A,ATM
Natural Killer Cell Signaling	2.58E00	1.69E-01	NaN	PIK3C2B,RAC2,MAPK1,GRB2,PIK3R1,HRAS,PLCG1,PIK3R4,INPP5D,PRKCI,SYK,PIK3CG,PLCG2,INPP5B,MAPK3,PIK3C3,VAV1,PIK3CB,PIK3CD,ATM
Sphingosine-1-phosphate Signaling	2.58E00	1.63E-01	NaN	PIK3C2B,PTK2B,MAPK1,PIK3R1,PLCG1,PLCL2,PIK3R4,ASAH1,PTK2,CASP12,RHOG,PIK3C3,PIK3CG,PLCG2,MAPK3,PIK3CB,PIK3CD,FNBP1,CASP5,ATM
Mouse Embryonic Stem Cell Pluripotency	2.57E00	1.82E-01	NaN	TP53,PIK3C2B,JAK1,MAPK1,GRB2,PIK3R1,HRAS,STAT3,PIK3R4,XIAP,MAPK14,MAPK3,PIK3C3,PIK3CG,PIK3CB,PIK3CD,TAB1,ATM
IL-12 Signaling and Production in Macrophages	2.54E00	1.46E-01	NaN	PIK3C2B,APOB,MAPK1,PIK3R1,RAB7A,NFKB2,PIK3R4,NFKB1,IKBKB,IKBKG,ALB,MAPK14,PRKCI,PIK3C3,PIK3CG,MAPK3,PIK3CB,PIK3CD,IRF8,REL,STAT1,NFKBIB,ATM
RhoGDI Signaling	2.54E00	1.39E-01	NaN	ARPC1B,MYL6,GNB2L1,ARPC5,ARHGEF1,CDC42,LIMK1,GNB1,RHOG,ACTR3,ARPC3,ARHGEF2,ACTC1,PI4KA,ACTR2,ARPC5L,ACTB,ARHGAP4,WASF1,ACTG1,MYL1,MYL12A,ARPC2,ARHGEF18,WASF2,ARHGAP1,ARPC4,FNBP1
Mechanisms of Viral Exit from Host Cells	2.53E00	2.22E-01	NaN	VPS25,PRKCI,VPS28,CHMP2A,ACTB,XPO1,PDCD6IP,ACTC1,ACTG1,LMNB1
2-ketoglutarate Dehydrogenase Complex	2.52E00	3.33E-01	NaN	DHTKD1,DLD,OGDH
Proline Biosynthesis I	2.52E00	2.14E-01	NaN	PYCRL,ALDH18A1,PYCR1
Mitotic Roles of Polo-Like Kinase	2.52E00	1.89E-01	NaN	SMC3,PPP2CA,PPP2R2A,ANAPC7,ANAPC1,CDK1,SMC1A,HSP90B1,PPP2R1A,HSP90AB1,HSP90AA1,PPP2R5C,PPP2R5E,PPP2R1B
Cleavage and Polyadenylation of Pre-mRNA	2.5E00	3.85E-01	NaN	CPSF6,CSTF1,NUDT21,CPSF1,CPSF3
G Beta Gamma Signaling	2.5E00	1.4E-01	NaN	MAPK1,GRB2,GNB2L1,PRKAR2A,HRAS,PLCG1,CDC42,PRKAG1,GNB1,BTK,PRKCI,PRKAR2B,PIK3CG,PLCG2,MAPK3,DNM2,PRKAR1A
Phospholipase C Signaling	2.47E00	1.32E-01	NaN	PEBP1,RALA,MAPK1,MYL6,GNB2L1,RPS6KA3,HRAS,PPP1CB,ARHGEF1,NFKB1,GNB1,HDAC6,RHOG,PPP3CB,PPP3R1,MAPK3,ARHGEF2,PPP3CA,CALML5,CD79B,HDAC2,GRB2,HDAC1,PLCG1,NFKB2,NFATC4,RAP1A,MYL1,BTK,MYL12A,PRKCI,SYK,PLCG2,ARHGEF18,FNBP1
Synaptic Long Term Potentiation	2.47E00	1.62E-01	NaN	CALML5,MAPK1,PRKAR2A,PPP1CB,HRAS,PLCG1,PLCL2,RAP1A,PRKAG1,CAMK2D,PRKCI,PRKAR2B,PPP3CB,MAPK3,PLCG2,PPP3R1,RPS6KA1,PPP1CA,PPP3CA,CAMK2G,PRKAR1A
RAR Activation	2.43E00	1.44E-01	NaN	MAPK1,PIK3R1,NFKB1,PRKAG1,PSMC5,TNIP1,RPL7A,PIK3CG,CSNK2A1,NCOR1,CSNK2B,STAT5B,SMAD2,CSK,PRKAR2A,NFKB2,PRMT1,CSNK2A2,PRKCI,MAPK14,PRKAR2B,PIK3CD,PIK3CB,NCOR2,REL,PML,CARM1,PRKAR1A
Relaxin Signaling	2.41E00	1.4E-01	NaN	PIK3C2B,MAPK1,NFKBIE,PDE12,PIK3R1,GNB2L1,PRKAR2A,NFKB2,PIK3R4,NFKB1,RAP1A,PRKAG1,GNB1,PRKAR2B,NFKBIA,PIK3C3,PIK3CG,MAPK3,PIK3CB,PIK3CD,NFKBIB,PRKAR1A,ATM
Cell Cycle Regulation by BTG Family Proteins	2.41E00	2.31E-01	NaN	PPP2R1A,CNOT7,PPP2CA,PPP2R2A,CDK4,PPP2R5C,PPP2R5E,PPP2R1B,PRMT1
HER-2 Signaling in Breast Cancer	2.41E00	1.83E-01	NaN	TP53,PIK3C2B,GRB2,PIK3R1,CDK6,HRAS,PLCG1,CDC42,PIK3R4,PRKCI,PIK3CG,PIK3C3,PIK3CB,PIK3CD,ATM
VEGF Family Ligand-Receptor Interactions	2.41E00	1.7E-01	NaN	PIK3C2B,MAPK1,GRB2,PIK3R1,HRAS,PLCG1,PIK3R4,PRKCI,PLCG2,PIK3CG,PIK3C3,MAPK3,PIK3CB,PIK3CD,ATM
Melatonin Signaling	2.34E00	1.73E-01	NaN	CALML5,MAPK1,PRKAR2A,PLCG1,PLCL2,PRKAG1,CAMK2D,PRKCI,PRKAR2B,ARAF,PLCG2,MAPK3,CAMK2G,PRKAR1A
TR/RXR Activation	2.32E00	1.47E-01	NaN	PIK3C2B,PIK3R1,PIK3R4,MTOR,LDLR,FASN,PIK3CG,PIK3C3,PIK3CB,PIK3CD,STRBP,NCOR1,ACACA,NCOR2,TBL1XR1,ATM
IL-22 Signaling	2.3E00	2.8E-01	NaN	JAK1,MAPK14,MAPK1,MAPK3,STAT3,STAT1,STAT5B
IL-1 Signaling	2.3E00	1.56E-01	NaN	MAPK1,NFKBIE,GNB2L1,PRKAR2A,NFKB2,NFKB1,PRKAG1,IRAK1,GNB1,IKBKB,IKBKG,PRKAR2B,MAPK14,NFKBIA,NFKBIB,TAB1,PRKAR1A
FGF Signaling	2.27E00	1.7E-01	NaN	PIK3C2B,MAPK1,GRB2,CRKL,PIK3R1,HRAS,PLCG1,STAT3,PIK3R4,MAPK14,MAPK3,PIK3CG,PIK3C3,PIK3CB,PIK3CD,ATM
Antiproliferative Role of Somatostatin Receptor 2	2.27E00	1.81E-01	NaN	GNB1,PIK3C2B,MAPK1,MAPK3,PIK3C3,PIK3CG,PIK3R1,GNB2L1,HRAS,PIK3CB,PIK3CD,PIK3R4,ATM
IL-17 Signaling	2.22E00	1.87E-01	NaN	PIK3C2B,JAK1,MAPK1,PIK3R1,HRAS,NFKB1,PIK3R4,MAPK14,PIK3CG,PIK3C3,MAPK3,PIK3CB,PIK3CD,ATM
Granzyme A Signaling	2.22E00	3E-01	NaN	HIST1H1C,NME1,HIST1H1D,SET,HIST1H1B,ANP32A
Death Receptor Signaling	2.2E00	1.76E-01	NaN	TANK,IKBKB,IKBKG,NFKBIA,NFKBIE,TBK1,NFKB2,NFKBIB,NFKB1,DIABLO,MAP4K4,XIAP
Role of JAK family kinases in IL-6-type Cytokine Signaling	2.2E00	2.5E-01	NaN	JAK1,MAPK14,MAPK1,MAPK3,STAT3,STAT1,STAT5B
CDK5 Signaling	2.17E00	1.65E-01	NaN	LAMA5,PPP2R1A,PRKAR2B,MAPK1,PPP2R2A,PPP2CA,MAPK3,PRKAR2A,HRAS,PPP1CB,PPP2R5C,PPP2R5E,PPP1CA,PPP2R1B,PRKAG1,PRKAR1A
TREM1 Signaling	2.14E00	1.6E-01	NaN	ICAM1,MAPK1,GRB2,PLCG2,MAPK3,PLCG1,STAT3,NFKB2,STAT5B,NFKB1,CASP5,IRAK1
B Cell Development	2.12E00	2.22E-01	NaN	PTPRC,CD19,CD79B,IGKC,HLA-DRA,HLA-DRB1,IGHM,HLA-DQB1
Antiproliferative Role of TOB in T Cell Signaling	2.1E00	2.69E-01	NaN	PABPC1,SMAD2,MAPK1,PABPC4,CDC34,RPS6KA1,SKP1
Docosahexaenoic Acid (DHA) Signaling	2.08E00	1.8E-01	NaN	PIK3C2B,PIK3CG,PIK3R1,PIK3C3,PIK3CB,PIK3CD,BAX,PIK3R4,ATM
Spliceosomal Cycle	2.06E00	2.22E-01	NaN	U2AF2,U2AF1
IL-10 Signaling	2.04E00	1.67E-01	NaN	IKBKB,IKBKG,JAK1,MAPK14,NFKBIA,MAPK1,NFKBIE,STAT3,NFKB2,NFKBIB,NFKB1,MAP4K4,TAB1
Glioblastoma Multiforme Signaling	2.04E00	1.37E-01	NaN	TP53,PIK3C2B,MAPK1,GRB2,PIK3R1,CDK4,CDK6,HRAS,PLCG1,PLCL2,PIK3R4,CDC42,MTOR,RHOG,NF1,PIK3C3,PIK3CG,PLCG2,MAPK3,PIK3CB,PIK3CD,FNBP1,ATM
TWEAK Signaling	2.03E00	2.05E-01	NaN	IKBKB,IKBKG,NFKBIA,NFKBIE,NFKB2,NFKBIB,NFKB1,XIAP
Telomere Extension by Telomerase	2.03E00	2.78E-01	NaN	HNRNPA1,XRCC6,HNRNPA2B1,XRCC5,RAD50
Isoleucine Degradation I	2.03E00	1.67E-01	NaN	HSD17B10,ECHS1,DLD,ACADSB,HADHA
Amyotrophic Lateral Sclerosis Signaling	2.02E00	1.35E-01	NaN	TP53,PIK3C2B,RAB5C,CAPN11,PIK3R1,BAX,PIK3R4,XIAP,CASP12,CAPNS1,PIK3CG,PIK3C3,CAT,PIK3CB,PIK3CD,PPP3CA,ATM
Superpathway of Inositol Phosphate Compounds	2.01E00	1.2E-01	NaN	PIK3R1,IGBP1,PIK3R4,SET,PLCH1,PTPRC,ATP1A1,PIK3C3,INPP5B,PIK3CG,PGAM5,PALD1,RNGTT,PI4KA,PPP3CA,ATM,PIK3C2B,SEC16A,PLCG1,PPP4R1,INPP5D,NUDT5,PLCG2,PIK3CB,PIK3CD,PPP2R5E,PPIP5K2,NUDT1
IL-15 Production	2E00	2.26E-01	NaN	PTK2,JAK1,PRKCI,PTK2B,NFKB2,STAT1,NFKB1
TNFR1 Signaling	2E00	1.85E-01	NaN	TANK,IKBKB,IKBKG,NFKBIA,NFKBIE,NFKB2,CDC42,NFKBIB,NFKB1,XIAP
Oncostatin M Signaling	1.95E00	2.29E-01	NaN	JAK1,MAPK1,GRB2,MAPK3,HRAS,STAT3,STAT1,STAT5B
Ephrin Receptor Signaling	1.95E00	1.24E-01	NaN	ACTR2,RAC2,EPHB4,MAPK1,ARPC1B,CXCR4,ARPC5L,GRB2,CRKL,ARPC5,GNB2L1,HRAS,STAT3,CDC42,RAP1A,LIMK1,PTK2,GNB1,ACTR3,ABI1,ARPC2,MAPK3,PIK3CG,ARPC3,MAP4K4,ARPC4
Toll-like Receptor Signaling	1.89E00	1.72E-01	NaN	IKBKB,IKBKG,MAPK14,NFKBIA,MAPK1,TICAM1,NFKB2,NFKB1,MAP4K4,TAB1,IRAK1
Selenocysteine Biosynthesis II (Archaea and Eukaryotes)	1.89E00	1.76E-01	NaN	SEPHS1,SARS2,SARS
Neuregulin Signaling	1.82E00	1.44E-01	NaN	MAPK1,GRB2,CRKL,PIK3R1,HRAS,PLCG1,RPS6,MTOR,HSP90B1,PRKCI,HSP90AB1,MAPK3,PLCG2,HSP90AA1,STAT5B
Calcium Signaling	1.8E00	1.2E-01	NaN	MYH10,MYL6,MAPK1,PRKAG1,HDAC6,CAMK2D,PPP3CB,MAPK3,PPP3R1,RYR3,ACTC1,PPP3CA,CALR,CALML5,HDAC2,HDAC1,PRKAR2A,TPM3,NFATC4,RAP1A,MYL1,PRKAR2B,ATP2B3,MYH9,CAMK2G,PRKAR1A
Antioxidant Action of Vitamin C	1.77E00	1.44E-01	NaN	MAPK1,NFKBIE,PLCG1,PLCL2,NFKB2,NFKB1,PRDX6,TXNRD1,IKBKB,IKBKG,NFKBIA,MAPK14,MAPK3,PLCG2,NFKBIB,STAT5B
CCR3 Signaling in Eosinophils	1.71E00	1.34E-01	NaN	PIK3C2B,CALML5,MAPK1,PIK3R1,GNB2L1,PPP1CB,HRAS,PIK3R4,LIMK1,GNB1,PRKCI,MAPK14,PIK3C3,PIK3CG,MAPK3,PIK3CB,PIK3CD,ATM
Pyrimidine Deoxyribonucleotides De Novo Biosynthesis I	1.7E00	1.36E-01	NaN	TYMS,DUT,NME1,RRM2B,RRM2,RRM1
Folate Polyglutamylation	1.68E00	1.5E-01	NaN	MTHFD1L,MTHFD1,SHMT2
Valine Degradation I	1.67E00	1.43E-01	NaN	ECHS1,BCKDHA,DLD,ACADSB,HADHA
Type I Diabetes Mellitus Signaling	1.67E00	1.4E-01	NaN	JAK1,MAPK1,NFKBIE,HLA-DRB1,HLA-DQB1,NFKB2,HSPD1,NFKB1,IRAK1,IKBKB,IKBKG,MAPK14,NFKBIA,HLA-C,HLA-DRA,NFKBIB,STAT1
BMP signaling pathway	1.65E00	1.51E-01	NaN	PRKAR2B,MAPK14,MAPK1,GRB2,MAPK3,PRKAR2A,HRAS,NFKB2,NFKB1,TAB1,PRKAG1,XIAP,PRKAR1A
Diphthamide Biosynthesis	1.61E00	1.54E-01	NaN	EEF2,DPH5
PRPP Biosynthesis I	1.61E00	2.86E-01	NaN	PRPS2,PRPS1
Inosine-5'-phosphate Biosynthesis II	1.61E00	1.25E-01	NaN	ADSL,PAICS
Hypusine Biosynthesis	1.61E00	4E-01	NaN	DHPS,EIF5A
S-adenosyl-L-methionine Biosynthesis	1.61E00	2.5E-01	NaN	MAT2B,MAT2A
CXCR4 Signaling	1.58E00	1.26E-01	NaN	PIK3C2B,MYL6,MAPK1,CXCR4,PIK3R1,GNB2L1,HRAS,PIK3R4,MYL1,GNB1,PTK2,MYL12A,RHOG,PRKCI,PIK3CG,PIK3C3,MAPK3,PIK3CB,PIK3CD,ELMO1,FNBP1,ATM
Calcium-induced T Lymphocyte Apoptosis	1.58E00	1.55E-01	NaN	CALML5,PRKCI,PPP3CB,HDAC2,PPP3R1,HLA-DRA,HDAC1,PLCG1,HLA-DRB1,HLA-DQB1,PPP3CA
DNA damage-induced 14-3-3σ Signaling	1.57E00	2.27E-01	NaN	TP53,RAD17,ATR,CDK1,ATM
MIF-mediated Glucocorticoid Regulation	1.53E00	1.67E-01	NaN	NFKBIA,MAPK1,MAPK3,NFKBIE,NFKB2,NFKBIB,NFKB1
Histidine Degradation III	1.5E00	1.67E-01	NaN	MTHFD1L,MTHFD2,MTHFD1
GNRH Signaling	1.5E00	1.24E-01	NaN	MAPK1,GRB2,PRKAR2A,HRAS,MAP3K4,NFKB2,NFKB1,CDC42,PRKAG1,PTK2,PRKAR2B,MAPK14,CAMK2D,PRKCI,MAPK3,DNM1L,DNM2,CAMK2G,PRKAR1A
α-Adrenergic Signaling	1.49E00	1.28E-01	NaN	CALML5,MAPK1,GNB2L1,PRKAR2A,HRAS,PLCG1,PYGB,PRKAG1,GNB1,PRKCI,PRKAR2B,MAPK3,PLCG2,PRKAR1A
MIF Regulation of Innate Immunity	1.48E00	1.54E-01	NaN	TP53,NFKBIA,MAPK1,MAPK3,NFKBIE,NFKB2,NFKBIB,NFKB1
DNA Double-Strand Break Repair by Homologous Recombination	1.46E00	2.22E-01	NaN	POLA1,RPA1,RAD50,ATM
Colanic Acid Building Blocks Biosynthesis	1.46E00	1.11E-01	NaN	GMPPB,GMPPA,UGP2,GALK1
UVC-Induced MAPK Signaling	1.43E00	1.82E-01	NaN	TP53,PRKCI,MAPK14,ARAF,MAPK1,MAPK3,HRAS,ATR
Crosstalk between Dendritic Cells and Natural Killer Cells	1.42E00	1.32E-01	NaN	ACTB,HLA-DRB1,TLN1,NFKB2,NFKB1,ACTG1,CAMK2D,TLN2,HLA-DRB4,HLA-C,HLA-DRB3,HLA-DRA,ACTC1,CAMK2G
Acute Phase Response Signaling	1.39E00	1.27E-01	NaN	FTL,MAPK1,GRB2,NFKBIE,PIK3R1,HRAS,NFKB2,STAT3,NFKB1,HNRNPK,IRAK1,IKBKB,IKBKG,MTOR,ALB,MAPK14,NFKBIA,PIK3CG,MAPK3,PIK3CB,PIK3CD,NFKBIB,TAB1
Colorectal Cancer Metastasis Signaling	1.38E00	1.16E-01	NaN	JAK1,MAPK1,PIK3R1,GNB2L1,HRAS,NFKB1,PIK3R4,PRKAG1,MLH1,GNB1,RHOG,MAPK3,PIK3CG,PIK3C3,STAT1,ATM,TP53,SMAD2,PIK3C2B,GRB2,PRKAR2A,STAT3,BAX,NFKB2,PRKAR2B,MSH2,MSH6,PIK3CB,PIK3CD,FNBP1,PRKAR1A
3-phosphoinositide Biosynthesis	1.37E00	1.16E-01	NaN	PIK3C2B,PIK3R1,IGBP1,PPP4R1,PIK3R4,SET,PTPRC,NUDT5,ATP1A1,PIK3CG,PIK3C3,PGAM5,PIK3CB,PIK3CD,PALD1,PPP2R5E,RNGTT,PPP3CA,PI4KA,ATM,NUDT1
CD27 Signaling in Lymphocytes	1.36E00	1.53E-01	NaN	IKBKB,IKBKG,NFKBIA,NFKBIE,IKBKAP,NFKB2,MAP3K4,NFKBIB,NFKB1
Assembly of RNA Polymerase I Complex	1.36E00	2.31E-01	NaN	POLR1C,POLR1A,POLR1B
Branched-chain α-keto acid Dehydrogenase Complex	1.34E00	2.22E-01	NaN	BCKDHA,DLD
Dopamine Receptor Signaling	1.32E00	1.25E-01	NaN	PPP2R1A,PRKAR2B,PPP2CA,PPP2R2A,PRKAR2A,PPP1CB,PPP2R5C,PPP2R5E,PPP1CA,PPP2R1B,PRKAG1,PRKAR1A
Cellular Effects of Sildenafil (Viagra)	1.27E00	1.16E-01	NaN	MYH10,CALML5,MYL6,ACTB,PRKAR2A,PPP1CB,PLCG1,PLCL2,ACTG1,PRKAG1,MYL1,MYL12A,PRKAR2B,PABPC4,PLCG2,MYH9,ACTC1,PRKAR1A
Fatty Acid β-oxidation I	1.26E00	1.33E-01	NaN	HSD17B10,ACSL3,ECHS1,ACADM,HADHA,HSD17B8
Role of NANOG in Mammalian Embryonic Stem Cell Pluripotency	1.26E00	1.34E-01	NaN	TP53,PIK3C2B,JAK1,MAPK1,GRB2,PIK3R1,HRAS,STAT3,PIK3R4,PIK3CG,PIK3C3,MAPK3,PIK3CB,PIK3CD,ATM,TCL1A
Reelin Signaling in Neurons	1.22E00	1.41E-01	NaN	BLK,PIK3C2B,CRKL,PIK3CG,PIK3R1,PIK3C3,ARHGEF1,PIK3CB,ARHGEF2,PIK3CD,PIK3R4,ATM
Nur77 Signaling in T Lymphocytes	1.18E00	1.41E-01	NaN	CALML5,PPP3CB,HDAC2,PPP3R1,HLA-DRA,HDAC1,HLA-DRB1,HLA-DQB1,PPP3CA
Role of JAK1, JAK2 and TYK2 in Interferon Signaling	1.18E00	1.79E-01	NaN	JAK1,STAT3,NFKB2,STAT1,NFKB1
nNOS Signaling in Neurons	1.18E00	1.54E-01	NaN	CALML5,PRKCI,CAPNS1,PPP3CB,CAPN11,PPP3R1,PPP3CA,PFKM
Pyruvate Fermentation to Lactate	1.15E00	2.22E-01	NaN	LDHA,LDHB
CMP-N-acetylneuraminate Biosynthesis I (Eukaryotes)	1.15E00	1.11E-01	NaN	GNE,NAGK
dTMP De Novo Biosynthesis	1.15E00	1.43E-01	NaN	TYMS,SHMT2
Neuroprotective Role of THOP1 in Alzheimer's Disease	1.13E00	1.27E-01	NaN	PRKAR2B,YWHAE,HLA-C,PRKAR2A,IDE,PRKAG1,PRKAR1A
Pentose Phosphate Pathway	1.12E00	1.3E-01	NaN	TKT,G6PD,RPIA
Cardiac β-adrenergic Signaling	1.12E00	1.14E-01	NaN	AKAP8,PPP2R2A,PPP2CA,PDE12,GNB2L1,PRKAR2A,PPP1CB,PRKAG1,GNB1,AKAP13,PPP2R1A,PRKAR2B,PPP2R5C,PPP2R5E,PPP1CA,PPP2R1B,AKAP9,PRKAR1A
Ethanol Degradation IV	1.1E00	1.38E-01	NaN	ALDH1B1,ACSL3,CAT,ALDH9A1
Pyridoxal 5'-phosphate Salvage Pathway	1.08E00	1.32E-01	NaN	PDXK,ARAF,MAPK1,MAPK3,PRKAA1,CDK6,CDK4,CDK1,LIMK1,IRAK1
Acetyl-CoA Biosynthesis III (from Citrate)	1.03E00	1.25E-01	NaN	ACLY
Thiamin Salvage III	1.03E00	2E-01	NaN	TPK1
Asparagine Biosynthesis I	1.03E00	1.25E-01	NaN	ASNS
Adenine and Adenosine Salvage VI	1.03E00	2E-01	NaN	ADK
Glutaryl-CoA Degradation	1.03E00	1.25E-01	NaN	HSD17B10,HADHA,HSD17B8
Glycogen Degradation III	1.03E00	1.67E-01	NaN	GAA,PYGB,AGL
Agrin Interactions at Neuromuscular Junction	1.01E00	1.43E-01	NaN	PTK2,RAC2,MAPK1,MAPK3,ACTB,HRAS,CDC42,ACTC1,ACTG1,CTTN
Arginine Biosynthesis IV	9.97E-01	8.33E-02	NaN	GLUD1,ASL
Proline Biosynthesis II (from Arginine)	9.97E-01	1E-01	NaN	PYCRL,PYCR1
Superpathway of Serine and Glycine Biosynthesis I	9.97E-01	1.11E-01	NaN	PSAT1,SHMT2
Arginine Degradation VI (Arginase 2 Pathway)	9.97E-01	1.25E-01	NaN	PYCRL,PYCR1
Pentose Phosphate Pathway (Non-oxidative Branch)	9.97E-01	1.54E-01	NaN	TKT,RPIA
Acetyl-CoA Biosynthesis I (Pyruvate Dehydrogenase Complex)	9.97E-01	1.82E-01	NaN	DLD,PDHB
Glycogen Biosynthesis II (from UDP-D-Glucose)	9.97E-01	1.67E-01	NaN	UGP2,GBE1
GDP-mannose Biosynthesis	9.97E-01	1.54E-01	NaN	GMPPB,GMPPA
Salvage Pathways of Pyrimidine Ribonucleotides	9.94E-01	1.15E-01	NaN	PYCRL,NME1,MAPK1,CDK4,CDK6,CDK1,LIMK1,IRAK1,ARAF,MAPK3,PRKAA1,UCK2,UCKL1
Semaphorin Signaling in Neurons	9.74E-01	1.48E-01	NaN	PTK2,DPYSL2,RHOG,MAPK1,MAPK3,ARHGAP1,FNBP1,LIMK1
Assembly of RNA Polymerase III Complex	9.45E-01	1.88E-01	NaN	GTF3C5,SF3A1,POLR3D
G-Protein Coupled Receptor Signaling	9.23E-01	1.09E-01	NaN	MAPK1,PTK2B,PDE12,PIK3R1,NFKBIE,HRAS,PIK3R4,NFKB1,PRKAG1,IKBKB,IKBKG,NFKBIA,CAMK2D,PIK3C3,PIK3CG,MAPK3,NFKBIB,ATM,PIK3C2B,GRB2,PRKAR2A,STAT3,NFKB2,RAP1A,PRKAR2B,PIK3CB,PIK3CD,RPS6KA1,CAMK2G,PRKAR1A
Endothelin-1 Signaling	9.22E-01	1.09E-01	NaN	PIK3C2B,MAPK1,GRB2,PIK3R1,HRAS,PLCG1,PLCL2,PIK3R4,PRDX6,CASP12,MAPK14,PRKCI,ARAF,PIK3C3,PIK3CG,PLCG2,MAPK3,PIK3CB,PIK3CD,CASP5,ATM
Dopamine-DARPP32 Feedback in cAMP Signaling	9.14E-01	1.07E-01	NaN	CALML5,PPP2CA,PPP2R2A,PRKAR2A,PPP1CB,PLCG1,PLCL2,PRKAG1,PPP2R1A,PRKCI,PRKAR2B,PPP3CB,PLCG2,PPP3R1,PPP2R5C,PPP2R5E,PPP1CA,PPP2R1B,PPP3CA,PRKAR1A
Superpathway of Citrulline Metabolism	8.7E-01	7.89E-02	NaN	GLS,ALDH18A1,ASL
Urate Biosynthesis/Inosine 5'-phosphate Degradation	8.7E-01	1.3E-01	NaN	IMPDH2,IMPDH1,NT5C2
ERK5 Signaling	8.63E-01	1.32E-01	NaN	YWHAQ,YWHAG,YWHAE,YWHAH,YWHAB,YWHAZ,RPS6KA3,HRAS,RPS6KA1
Sonic Hedgehog Signaling	8.5E-01	1.43E-01	NaN	PRKAR2B,PRKAR2A,CDK1,PRKAG1,PRKAR1A
Polyamine Regulation in Colon Cancer	8.47E-01	1.33E-01	NaN	PSME1,PSME2,PSME4,PSME3
TCA Cycle II (Eukaryotic)	8.47E-01	1E-01	NaN	DHTKD1,DLD,IDH3A,OGDH
Citrulline Biosynthesis	7.79E-01	7.69E-02	NaN	GLS,ALDH18A1
OX40 Signaling Pathway	7.6E-01	1.13E-01	NaN	HLA-DRB4,NFKBIA,HLA-C,HLA-DRB3,NFKBIE,HLA-DRA,HLA-DRB1,HLA-DQB1,NFKB2,NFKBIB,NFKB1
Guanine and Guanosine Salvage I	7.51E-01	1.11E-01	NaN	HPRT1
S-methyl-5'-thioadenosine Degradation II	7.51E-01	1.67E-01	NaN	MTAP
S-methyl-5-thio-α-D-ribose 1-phosphate Degradation	7.51E-01	6.67E-02	NaN	APIP
Flavin Biosynthesis IV (Mammalian)	7.51E-01	1.25E-01	NaN	FLAD1
Palmitate Biosynthesis I (Animals)	7.51E-01	2.7E-02	NaN	FASN
L-cysteine Degradation III	7.51E-01	1.11E-01	NaN	MPST
Uridine-5'-phosphate Biosynthesis	7.51E-01	5E-02	NaN	CAD
L-glutamine Biosynthesis II (tRNA-dependent)	7.51E-01	9.09E-02	NaN	QRSL1
Fatty Acid Biosynthesis Initiation II	7.51E-01	1.43E-01	NaN	FASN
Adenine and Adenosine Salvage I	7.51E-01	1.11E-01	NaN	APRT
Glycine Biosynthesis I	7.51E-01	1.67E-01	NaN	SHMT2
Glutamine Degradation I	7.51E-01	2E-01	NaN	GLS
Glutamate Biosynthesis II	7.51E-01	1.43E-01	NaN	GLUD1
Glutamate Degradation X	7.51E-01	1.43E-01	NaN	GLUD1
Tumoricidal Function of Hepatic Natural Killer Cells	7.47E-01	1.48E-01	NaN	M6PR,ICAM1,BAX,AIFM1
Glycolysis I	7.47E-01	9.76E-02	NaN	PKM,GAPDH,PFKL,PFKM
Oxidative Ethanol Degradation III	7.41E-01	7.5E-02	NaN	ALDH1B1,ACSL3,ALDH9A1
IL-17A Signaling in Gastric Cells	7.02E-01	1.43E-01	NaN	MAPK14,MAPK1,MAPK3,NFKB1
CCR5 Signaling in Macrophages	6.98E-01	9.28E-02	NaN	GNB1,CALML5,PRKCI,MAPK14,MAPK1,PTK2B,PLCG2,GNB2L1,PLCG1
Leucine Degradation I	6.96E-01	7.69E-02	NaN	ACADM,MCCC2
D-myo-inositol (1,4,5)-trisphosphate Degradation	6.36E-01	1.3E-01	NaN	INPP5B,SEC16A,INPP5D
Endoplasmic Reticulum Stress Pathway	6.36E-01	1.58E-01	NaN	CASP12,EIF2S1,HSPA5
Role of Osteoblasts, Osteoclasts and Chondrocytes in Rheumatoid Arthritis	6.3E-01	9.6E-02	NaN	PIK3C2B,CALML5,PTK2B,MAPK1,NFKBIE,PIK3R1,NFATC4,PIK3R4,NFKB1,XIAP,IKBKB,IKBKG,MAPK14,NFKBIA,PPP3CB,PIK3C3,PIK3CG,MAPK3,PPP3R1,PIK3CB,PIK3CD,NFKBIB,PPP3CA,ATM
Glycogen Degradation II	6.25E-01	1.25E-01	NaN	PYGB,AGL
Glycine Betaine Degradation	6.25E-01	8.7E-02	NaN	SRR,SHMT2
Role of IL-17F in Allergic Inflammatory Airway Diseases	6.24E-01	1.25E-01	NaN	MAPK1,MAPK3,RPS6KA3,NFKB2,RPS6KA1,NFKB1
Regulation of the Epithelial-Mesenchymal Transition Pathway	6.18E-01	1.02E-01	NaN	ETS1,SMAD2,PIK3C2B,JAK1,MAPK1,GRB2,PIK3R1,HRAS,NCSTN,NFKB2,STAT3,NFKB1,PIK3R4,ARAF,PIK3C3,PIK3CG,MAPK3,PIK3CB,PIK3CD,ATM
Corticotropin Releasing Hormone Signaling	6.01E-01	8.97E-02	NaN	CALML5,PRKCI,MAPK14,PRKAR2B,MAPK1,PLCG2,MAPK3,ARPC5,PRKAR2A,PLCG1,RAP1A,PRKAG1,PRKAR1A
L-carnitine Biosynthesis	5.95E-01	7.69E-02	NaN	ALDH9A1
NADH Repair	5.95E-01	1.11E-01	NaN	GAPDH
Methylglyoxal Degradation I	5.95E-01	9.09E-02	NaN	GLO1
Coenzyme A Biosynthesis	5.95E-01	7.14E-02	NaN	PPCDC
Methionine Salvage II (Mammalian)	5.95E-01	1.11E-01	NaN	MTR
Spermidine Biosynthesis I	5.95E-01	1.25E-01	NaN	SRM
4-aminobutyrate Degradation I	5.95E-01	1E-01	NaN	SUCLG2
L-serine Degradation	5.95E-01	1.67E-01	NaN	SRR
1D-myo-inositol Hexakisphosphate Biosynthesis II (Mammalian)	5.9E-01	1.07E-01	NaN	INPP5B,SEC16A,INPP5D
D-myo-inositol (1,3,4)-trisphosphate Biosynthesis	5.9E-01	1.2E-01	NaN	INPP5B,SEC16A,INPP5D
Role of Macrophages, Fibroblasts and Endothelial Cells in Rheumatoid Arthritis	5.82E-01	9.36E-02	NaN	ICAM1,MAPK1,PIK3R1,NFKBIE,HRAS,NFKB1,PIK3R4,IRAK1,IKBKB,IKBKG,CAMK2D,NFKBIA,PPP3CB,PPP3R1,PIK3CG,PIK3C3,MAPK3,NFKBIB,PPP3CA,ATM,PIK3C2B,CALML5,PLCG1,PLCL2,STAT3,NFATC4,MAPK14,PRKCI,PLCG2,PIK3CB,PIK3CD,CAMK2G
D-myo-inositol (1,4,5)-Trisphosphate Biosynthesis	5.5E-01	1E-01	NaN	PLCG2,PLCG1,PLCH1,PI4KA
Purine Nucleotides Degradation II (Aerobic)	5.48E-01	8.11E-02	NaN	IMPDH2,IMPDH1,NT5C2
Pyrimidine Ribonucleotides De Novo Biosynthesis	5.18E-01	7.41E-02	NaN	NUDT5,NME1,CAD,CTPS1
Tryptophan Degradation III (Eukaryotic)	5.09E-01	6.25E-02	NaN	HSD17B10,HADHA,HSD17B8
Hepatic Cholestasis	5.06E-01	8.2E-02	NaN	TJP2,NFKBIE,PRKAR2A,NFKB2,MAP3K4,NFKB1,PRKAG1,IRAK1,IKBKB,IKBKG,PRKAR2B,NFKBIA,PRKCI,NFKBIB,PRKAR1A
D-myo-inositol-5-phosphate Metabolism	4.93E-01	9.26E-02	NaN	PLCG1,IGBP1,PPP4R1,SET,PLCH1,PTPRC,NUDT5,ATP1A1,PLCG2,PGAM5,PPP2R5E,PALD1,RNGTT,PPP3CA,NUDT1
Uracil Degradation II (Reductive)	4.9E-01	9.09E-02	NaN	DPYSL2
Serine Biosynthesis	4.9E-01	7.69E-02	NaN	PSAT1
D-glucuronate Degradation I	4.9E-01	7.14E-02	NaN	DCXR
Thymine Degradation	4.9E-01	9.09E-02	NaN	DPYSL2
Geranylgeranyldiphosphate Biosynthesis	4.9E-01	1.25E-01	NaN	GGPS1
Biotin-carboxyl Carrier Protein Assembly	4.9E-01	6.67E-02	NaN	ACACA
Molybdenum Cofactor Biosynthesis	4.9E-01	6.25E-02	NaN	MOCS2
Synaptic Long Term Depression	4.79E-01	9.26E-02	NaN	MAPK1,PPP2CA,PPP2R2A,HRAS,PLCG1,PLCL2,PRDX6,PPP2R1A,PRKCI,PLCG2,MAPK3,RYR3,PPP2R5C,PPP2R5E,PPP2R1B
Histamine Degradation	4.63E-01	6.9E-02	NaN	ALDH1B1,ALDH9A1
Gαi Signaling	4.61E-01	9.63E-02	NaN	GNB1,PRKAR2B,RALA,MAPK1,GRB2,MAPK3,GNB2L1,PRKAR2A,HRAS,STAT3,RAP1A,PRKAG1,PRKAR1A
Primary Immunodeficiency Signaling	4.51E-01	9.38E-02	NaN	PTPRC,BTK,CD19,IKBKG,IGKC,IGHM
Ethanol Degradation II	4.33E-01	9.3E-02	NaN	HSD17B10,ALDH1B1,ACSL3,ALDH9A1
Chondroitin Sulfate Degradation (Metazoa)	4.21E-01	8.7E-02	NaN	MGEA5,HEXA
Pentose Phosphate Pathway (Oxidative Branch)	4.13E-01	9.09E-02	NaN	G6PD
2-oxobutanoate Degradation I	4.13E-01	5.88E-02	NaN	DLD
Trans, trans-farnesyl Diphosphate Biosynthesis	4.13E-01	1E-01	NaN	GGPS1
Citrulline-Nitric Oxide Cycle	4.13E-01	6.25E-02	NaN	ASL
NAD Biosynthesis III	4.13E-01	9.09E-02	NaN	NAMPT
Galactose Degradation I (Leloir Pathway)	4.13E-01	6.25E-02	NaN	GALK1
N-acetylglucosamine Degradation II	4.13E-01	7.69E-02	NaN	NAGK
Glutamate Degradation III (via 4-aminobutyrate)	4.13E-01	8.33E-02	NaN	SUCLG2
Acetate Conversion to Acetyl-CoA	4.13E-01	9.09E-02	NaN	ACSL3
Superpathway of D-myo-inositol (1,4,5)-trisphosphate Metabolism	4.1E-01	9.09E-02	NaN	INPP5B,SEC16A,INPP5D
G Protein Signaling Mediated by Tubby	4.08E-01	9.09E-02	NaN	GNB1,PLCG2,GNB2L1,PLCG1
Role of JAK2 in Hormone-like Cytokine Signaling	4.08E-01	1.08E-01	NaN	JAK1,STAT3,STAT1,STAT5B
Interferon Signaling	4.08E-01	1.11E-01	NaN	JAK1,PSMB8,BAX,STAT1
nNOS Signaling in Skeletal Muscle Cells	3.84E-01	6.45E-02	NaN	CALML5,RYR3
Dermatan Sulfate Degradation (Metazoa)	3.84E-01	8.7E-02	NaN	MGEA5,HEXA
TGF-β Signaling	3.76E-01	9.57E-02	NaN	SMAD2,MAPK14,MAPK1,GRB2,MAPK3,HDAC1,HRAS,CDC42,TAB1
Sperm Motility	3.67E-01	8.33E-02	NaN	PTK2,CALML5,PRKCI,PRKAR2B,PTK2B,PLCG2,PRKAR2A,PLCG1,PLCL2,PRKAG1,PRDX6,PRKAR1A
3-phosphoinositide Degradation	3.67E-01	8.64E-02	NaN	IGBP1,PPP4R1,SET,INPP5D,PTPRC,NUDT5,ATP1A1,INPP5B,PGAM5,PPP2R5E,PALD1,RNGTT,PPP3CA,NUDT1
Lipid Antigen Presentation by CD1	3.56E-01	1E-01	NaN	AP2B1,CALR,CANX
Urea Cycle	3.53E-01	5E-02	NaN	ASL
Thioredoxin Pathway	3.53E-01	1.25E-01	NaN	TXNRD1
Glycine Cleavage Complex	3.53E-01	6.67E-02	NaN	DLD
Superoxide Radicals Degradation	3.53E-01	1.25E-01	NaN	CAT
UDP-N-acetyl-D-glucosamine Biosynthesis II	3.53E-01	5.88E-02	NaN	GFPT1
Ceramide Degradation	3.53E-01	7.14E-02	NaN	ASAH1
Granzyme B Signaling	3.5E-01	1.11E-01	NaN	PRKDC,LMNB1
Fatty Acid α-oxidation	3.5E-01	8.7E-02	NaN	ALDH1B1,ALDH9A1
Parkinson's Signaling	3.5E-01	1.05E-01	NaN	MAPK14,MAPK1
Cholecystokinin/Gastrin-mediated Signaling	3.31E-01	9.43E-02	NaN	PTK2,PRKCI,RHOG,MAPK14,MAPK1,PTK2B,GRB2,MAPK3,HRAS,FNBP1
Gαs Signaling	3.26E-01	8.8E-02	NaN	GNB1,PRKAR2B,MAPK1,MAPK3,RYR3,GNB2L1,PRKAR2A,ADD1,RAP1A,PRKAG1,PRKAR1A
D-myo-inositol (1,4,5,6)-Tetrakisphosphate Biosynthesis	3.23E-01	8.33E-02	NaN	PTPRC,NUDT5,ATP1A1,PGAM5,IGBP1,PALD1,PPP4R1,PPP2R5E,SET,RNGTT,PPP3CA,NUDT1
D-myo-inositol (3,4,5,6)-tetrakisphosphate Biosynthesis	3.23E-01	8.33E-02	NaN	PTPRC,NUDT5,ATP1A1,PGAM5,IGBP1,PALD1,PPP4R1,PPP2R5E,SET,RNGTT,PPP3CA,NUDT1
Glutathione Redox Reactions I	3.2E-01	8.33E-02	NaN	PRDX6,GSTK1
Putrescine Degradation III	3.2E-01	6.67E-02	NaN	ALDH1B1,ALDH9A1
Pyrimidine Ribonucleotides Interconversion	3.1E-01	7.5E-02	NaN	NUDT5,NME1,CTPS1
Phosphatidylcholine Biosynthesis I	3.05E-01	5.88E-02	NaN	PCYT1B
Inositol Pyrophosphates Biosynthesis	3.05E-01	6.25E-02	NaN	PPIP5K2
Adenine and Adenosine Salvage III	3.05E-01	5.88E-02	NaN	HPRT1
Tryptophan Degradation X (Mammalian, via Tryptamine)	2.93E-01	6.9E-02	NaN	ALDH1B1,ALDH9A1
Thyroid Cancer Signaling	2.86E-01	9.09E-02	NaN	TP53,MAPK1,MAPK3,HRAS
Superpathway of Geranylgeranyldiphosphate Biosynthesis I (via Mevalonate)	2.69E-01	5.41E-02	NaN	HADHA,GGPS1
Sphingosine and Sphingosine-1-phosphate Metabolism	2.66E-01	4.76E-02	NaN	ASAH1
Phototransduction Pathway	2.55E-01	7.46E-02	NaN	GNB1,PRKAR2B,PRKAR2A,PRKAG1,PRKAR1A
Prostanoid Biosynthesis	2.33E-01	6.67E-02	NaN	PTGES2
Salvage Pathways of Pyrimidine Deoxyribonucleotides	2.33E-01	4.76E-02	NaN	TK1
Calcium Transport I	2.05E-01	7.14E-02	NaN	ATP2B3
Ketolysis	2.05E-01	5.26E-02	NaN	HADHA
