# Supplementary material for: Inhibition of Hsp90 Suppresses PI3K/AKT/mTOR Signaling and Has Antitumor Activity in Burkitt Lymphoma
Source: Oxford University Press journal article supplement (doi:10.1158/1535-7163.mct-16-0848), 2017-06-15
Supplement: 15357163mct160848-sup-175785_2_supp_4075432_lqvzll.xls [file 15357163mct160848-sup-175785_2_supp_4075432_lqvzll.xls]

## Sheet: Ramos
© 2000-2016 QIAGEN. All rights reserved.
ID	Symbol	Entrez Gene Name	Location	Type(s)	Drug(s)
AARD_HUMAN	AARD	alanine and arginine rich domain containing protein	Other	other
SYAC_HUMAN	AARS	alanyl-tRNA synthetase	Cytoplasm	enzyme
AASD1_HUMAN	AARSD1	alanyl-tRNA synthetase domain containing 1	Nucleus	enzyme
ABR_HUMAN	ABR	active BCR-related	Cytoplasm	other
ACACA_HUMAN	ACACA	acetyl-CoA carboxylase alpha	Cytoplasm	enzyme
ACAP2_HUMAN	ACAP2	ArfGAP with coiled-coil, ankyrin repeat and PH domains 2	Nucleus	other
GCP60_HUMAN	ACBD3	acyl-CoA binding domain containing 3	Cytoplasm	other
ACLY_HUMAN	ACLY	ATP citrate lyase	Cytoplasm	enzyme
ACTB_HUMAN	ACTB	actin, beta	Cytoplasm	other
ACL6A_HUMAN	ACTL6A	actin like 6A	Nucleus	other
ACTN4_HUMAN	ACTN4	actinin, alpha 4	Cytoplasm	transcription regulator
ARP2_HUMAN	ACTR2	ARP2 actin-related protein 2 homolog (yeast)	Plasma Membrane	other
ARP3_HUMAN	ACTR3	ARP3 actin-related protein 3 homolog (yeast)	Plasma Membrane	other
GDE_HUMAN	AGL	amylo-alpha-1, 6-glucosidase, 4-alpha-glucanotransferase	Cytoplasm	enzyme
SAHH_HUMAN	AHCY	adenosylhomocysteinase	Cytoplasm	enzyme	9-(2',3'-dihydroxycyclopent-4'-enyl)adenine, 3-deazaneplanocin, neplanocin A, 3-deazaaristeromycin, cyanovirin-N, 6'-C-methylneplanocin A
AHSA1_HUMAN	AHSA1	AHA1, activator of heat shock 90kDa protein ATPase homolog 1 (yeast)	Cytoplasm	other
AIMP1_HUMAN	AIMP1	aminoacyl tRNA synthetase complex-interacting multifunctional protein 1	Extracellular Space	cytokine
AIMP2_HUMAN	AIMP2	aminoacyl tRNA synthetase complex-interacting multifunctional protein 2	Plasma Membrane	other
AIP_HUMAN	AIP	aryl hydrocarbon receptor interacting protein	Nucleus	transcription regulator
AKAP8_HUMAN	AKAP8	A-kinase anchoring protein 8	Nucleus	other
AKP8L_HUMAN	AKAP8L	A-kinase anchoring protein 8 like	Nucleus	other
ARK72_HUMAN	AKR7A2	aldo-keto reductase family 7, member A2	Cytoplasm	enzyme
APC1_HUMAN	ANAPC1	anaphase promoting complex subunit 1	Nucleus	other
ANFY1_HUMAN	ANKFY1	ankyrin repeat and FYVE domain containing 1	Cytoplasm	transcription regulator
AN13A_HUMAN	ANKRD13A	ankyrin repeat domain 13A	Plasma Membrane	other
ANR28_HUMAN	ANKRD28	ankyrin repeat domain 28	Cytoplasm	other
ANR44_HUMAN	ANKRD44	ankyrin repeat domain 44	Other	other
ANR52_HUMAN	ANKRD52	ankyrin repeat domain 52	Nucleus	transcription regulator
AN32A_HUMAN	ANP32A	acidic nuclear phosphoprotein 32 family member A	Other	other
AN32E_HUMAN	ANP32E	acidic nuclear phosphoprotein 32 family member E	Nucleus	other
ANXA7_HUMAN	ANXA7	annexin A7	Plasma Membrane	ion channel
APC_HUMAN	APC	adenomatous polyposis coli	Nucleus	enzyme
ACPH_HUMAN	APEH	acylaminoacyl-peptide hydrolase	Cytoplasm	peptidase
AQR_HUMAN	AQR	aquarius intron-binding spliceosomal factor	Nucleus	other
COPD_HUMAN	ARCN1	archain 1	Cytoplasm	other
ARF1_HUMAN	ARF1	ADP ribosylation factor 1	Cytoplasm	enzyme
ARFP2_HUMAN	ARFIP2	ADP ribosylation factor interacting protein 2	Cytoplasm	other
ARHGI_HUMAN	ARHGEF18	Rho/Rac guanine nucleotide exchange factor 18	Cytoplasm	other
ARC1B_HUMAN	ARPC1B	actin related protein 2/3 complex subunit 1B	Cytoplasm	other
ARPC2_HUMAN	ARPC2	actin related protein 2/3 complex subunit 2	Cytoplasm	other
ARPC3_HUMAN	ARPC3	actin related protein 2/3 complex subunit 3	Cytoplasm	other
ARPC4_HUMAN	ARPC4	actin related protein 2/3 complex subunit 4	Cytoplasm	other
ARPC5_HUMAN	ARPC5	actin related protein 2/3 complex subunit 5	Cytoplasm	other
ASCC3_HUMAN	ASCC3	activating signal cointegrator 1 complex subunit 3	Cytoplasm	enzyme
ASF1B_HUMAN	ASF1B	anti-silencing function 1B histone chaperone	Nucleus	other
ASML_HUMAN	ASMTL	acetylserotonin O-methyltransferase-like	Cytoplasm	enzyme
ASNA_HUMAN	ASNA1	arsA arsenite transporter, ATP-binding, homolog 1 (bacterial)	Nucleus	transporter
ASNS_HUMAN	ASNS	asparagine synthetase (glutamine-hydrolyzing)	Cytoplasm	enzyme
ATM_HUMAN	ATM	ATM serine/threonine kinase	Nucleus	kinase
ATPB_HUMAN	ATP5B	ATP synthase, H+ transporting, mitochondrial F1 complex, beta polypeptide	Cytoplasm	transporter
VATA_HUMAN	ATP6V1A	ATPase, H+ transporting, lysosomal 70kDa, V1 subunit A	Plasma Membrane	transporter	bafilomycin A1, bafilomycin b1
VATE1_HUMAN	ATP6V1E1	ATPase, H+ transporting, lysosomal 31kDa, V1 subunit E1	Cytoplasm	transporter
BACH2_HUMAN	BACH2	BTB and CNC homology 1, basic leucine zipper transcription factor 2	Nucleus	transcription regulator
BAG6_HUMAN	BAG6	BCL2 associated athanogene 6	Nucleus	enzyme
BAX_HUMAN	BAX	BCL2-associated X protein	Cytoplasm	transporter
BICD2_HUMAN	BICD2	bicaudal D homolog 2 (Drosophila)	Cytoplasm	other
BRAT1_HUMAN	BRAT1	BRCA1-associated ATM activator 1	Nucleus	other
BRCC3_HUMAN	BRCC3	BRCA1/BRCA2-containing complex subunit 3	Nucleus	enzyme
BTK_HUMAN	BTK	Bruton tyrosine kinase	Cytoplasm	kinase	ibrutinib, bendamustine/ibrutinib/rituximab, CC-292, ONO-4059, ACP-196, BGB-3111, ACP-196/ACP-319, GDC-0853
HIKES_HUMAN	C11orf73	chromosome 11 open reading frame 73	Cytoplasm	transporter
CG050_HUMAN	C7orf50	chromosome 7 open reading frame 50	Other	other
CYBP_HUMAN	CACYBP	calcyclin binding protein	Nucleus	other
PYR1_HUMAN	CAD	carbamoyl-phosphate synthetase 2, aspartate transcarbamylase, and dihydroorotase	Cytoplasm	enzyme
CAPS1_HUMAN	CADPS	Ca++-dependent secretion activator	Plasma Membrane	other
CALU_HUMAN	CALU	calumenin	Cytoplasm	other
KCC2D_HUMAN	CAMK2D	calcium/calmodulin-dependent protein kinase II delta	Cytoplasm	kinase
CAND1_HUMAN	CAND1	cullin-associated and neddylation-dissociated 1	Cytoplasm	transcription regulator
CAZA1_HUMAN	CAPZA1	capping protein (actin filament) muscle Z-line, alpha 1	Cytoplasm	other
CC88B_HUMAN	CCDC88B	coiled-coil domain containing 88B	Nucleus	enzyme
DAPLE_HUMAN	CCDC88C	coiled-coil domain containing 88C	Cytoplasm	other
TCPB_HUMAN	CCT2	chaperonin containing TCP1 subunit 2	Cytoplasm	kinase
TCPG_HUMAN	CCT3	chaperonin containing TCP1 subunit 3	Cytoplasm	other
TCPD_HUMAN	CCT4	chaperonin containing TCP1 subunit 4	Cytoplasm	other
TCPE_HUMAN	CCT5	chaperonin containing TCP1 subunit 5	Cytoplasm	other
TCPZ_HUMAN	CCT6A	chaperonin containing TCP1 subunit 6A	Cytoplasm	other
TCPH_HUMAN	CCT7	chaperonin containing TCP1 subunit 7	Cytoplasm	other
TCPQ_HUMAN	CCT8	chaperonin containing TCP1 subunit 8	Cytoplasm	enzyme
CD22_HUMAN	CD22	CD22 molecule	Plasma Membrane	transmembrane receptor	epratuzumab, BL22 immunotoxin, inotuzumab ozogamicin, combotox, RFB4-dgRTA, immunotoxin HA22
CD38_HUMAN	CD38	CD38 molecule	Plasma Membrane	enzyme	daratumumab
CDC37_HUMAN	CDC37	cell division cycle 37	Cytoplasm	other
CDK1_HUMAN	CDK1	cyclin-dependent kinase 1	Nucleus	kinase	dinaciclib, milciclib, SB-1317, roniciclib, alvocidib
CD11A_HUMAN	CDK11A	cyclin-dependent kinase 11A	Nucleus	kinase
CHD4_HUMAN	CHD4	chromodomain helicase DNA binding protein 4	Nucleus	enzyme
CHERP_HUMAN	CHERP	calcium homeostasis endoplasmic reticulum protein	Cytoplasm	other
CTF18_HUMAN	CHTF18	chromosome transmission fidelity factor 18	Nucleus	other
CIAO1_HUMAN	CIAO1	cytosolic iron-sulfur assembly component 1	Nucleus	transcription regulator
CLIC1_HUMAN	CLIC1	chloride intracellular channel 1	Nucleus	ion channel
CLIC4_HUMAN	CLIC4	chloride intracellular channel 4	Plasma Membrane	ion channel
CLH1_HUMAN	CLTC	clathrin, heavy chain (Hc)	Plasma Membrane	other
CNN2_HUMAN	CNN2	calponin 2	Cytoplasm	other
CNOT1_HUMAN	CNOT1	CCR4-NOT transcription complex subunit 1	Cytoplasm	other
COG2_HUMAN	COG2	component of oligomeric golgi complex 2	Cytoplasm	transporter
COPA_HUMAN	COPA	coatomer protein complex subunit alpha	Cytoplasm	transporter
COPB_HUMAN	COPB1	coatomer protein complex subunit beta 1	Cytoplasm	transporter
COPB2_HUMAN	COPB2	coatomer protein complex subunit beta 2 (beta prime)	Cytoplasm	transporter
COPE_HUMAN	COPE	coatomer protein complex subunit epsilon	Cytoplasm	transporter
COPG1_HUMAN	COPG1	coatomer protein complex subunit gamma 1	Cytoplasm	transporter
CSN4_HUMAN	COPS4	COP9 signalosome subunit 4	Cytoplasm	other
CSN6_HUMAN	COPS6	COP9 signalosome subunit 6	Nucleus	other
CSN7B_HUMAN	COPS7B	COP9 signalosome subunit 7B	Cytoplasm	other
CSN8_HUMAN	COPS8	COP9 signalosome subunit 8	Nucleus	other
CORO7_HUMAN	CORO7/CORO7-PAM16	coronin 7	Cytoplasm	other
CPSF1_HUMAN	CPSF1	cleavage and polyadenylation specific factor 1	Nucleus	other
CPSF2_HUMAN	CPSF2	cleavage and polyadenylation specific factor 2	Nucleus	other
CPSF3_HUMAN	CPSF3	cleavage and polyadenylation specific factor 3	Nucleus	enzyme
CRKL_HUMAN	CRKL	v-crk avian sarcoma virus CT10 oncogene homolog-like	Cytoplasm	kinase
XPO2_HUMAN	CSE1L	CSE1 chromosome segregation 1-like (yeast)	Nucleus	transporter
CSK21_HUMAN	CSNK2A1	casein kinase 2, alpha 1 polypeptide	Nucleus	kinase
CSK2B_HUMAN	CSNK2B	casein kinase 2, beta polypeptide	Cytoplasm	kinase
CTBP1_HUMAN	CTBP1	C-terminal binding protein 1	Nucleus	enzyme
PYRG1_HUMAN	CTPS1	CTP synthase 1	Nucleus	enzyme	cytidine triphosphate synthetase inhibitor
CUL2_HUMAN	CUL2	cullin 2	Nucleus	enzyme
CUL3_HUMAN	CUL3	cullin 3	Nucleus	enzyme
CUL4A_HUMAN	CUL4A	cullin 4A	Nucleus	other
CUTA_HUMAN	CUTA	cutA divalent cation tolerance homolog (E. coli)	Cytoplasm	other
CYFP2_HUMAN	CYFIP2	cytoplasmic FMR1 interacting protein 2	Cytoplasm	other
SYDC_HUMAN	DARS	aspartyl-tRNA synthetase	Cytoplasm	enzyme
DAZP1_HUMAN	DAZAP1	DAZ associated protein 1	Other	other
DBNL_HUMAN	DBNL	drebrin-like	Cytoplasm	other
DCK_HUMAN	DCK	deoxycytidine kinase	Nucleus	kinase	cytarabine/fludarabine phosphate, cladribine/cytarabine/daunorubicin, cladribine/cytarabine/filgrastim, cytarabine/filgrastim/fludarabine phosphate, cladribine/cytarabine/filgrastim/mitoxantrone, fludarabine phosphate/rituximab, cladribine/rituximab, cytarabine/filgrastim/fludarabine phosphate/idarubicin, dexamethasone/fludarabine phosphate/mitoxantrone, alemtuzumab/fludarabine phosphate, fludara…
DCTN1_HUMAN	DCTN1	dynactin subunit 1	Cytoplasm	other
DCTP1_HUMAN	DCTPP1	dCTP pyrophosphatase 1	Cytoplasm	enzyme
DCNL1_HUMAN	DCUN1D1	defective in cullin neddylation 1 domain containing 1	Nucleus	other
DCNL5_HUMAN	DCUN1D5	defective in cullin neddylation 1 domain containing 5	Other	other
DCXR_HUMAN	DCXR	dicarbonyl/L-xylulose reductase	Cytoplasm	enzyme
DDB1_HUMAN	DDB1	damage-specific DNA binding protein 1	Nucleus	other
DDHD1_HUMAN	DDHD1	DDHD domain containing 1	Extracellular Space	enzyme
DDX1_HUMAN	DDX1	DEAD/H-box helicase 1	Nucleus	enzyme
DDX17_HUMAN	DDX17	DEAD-box helicase 17	Nucleus	enzyme
DDX21_HUMAN	DDX21	DEAD-box helicase 21	Nucleus	enzyme
DDX3X_HUMAN	DDX3X	DEAD-box helicase 3, X-linked	Cytoplasm	enzyme
DDX5_HUMAN	DDX5	DEAD-box helicase 5	Nucleus	enzyme
DFFA_HUMAN	DFFA	DNA fragmentation factor, 45kDa, alpha polypeptide	Nucleus	enzyme
DHYS_HUMAN	DHPS	deoxyhypusine synthase	Cytoplasm	enzyme
DHTK1_HUMAN	DHTKD1	dehydrogenase E1 and transketolase domain containing 1	Cytoplasm	enzyme
DHX16_HUMAN	DHX16	DEAH-box helicase 16	Nucleus	enzyme
DHX30_HUMAN	DHX30	DEAH-box helicase 30	Nucleus	enzyme
DHX36_HUMAN	DHX36	DEAH-box helicase 36	Cytoplasm	enzyme
DHX9_HUMAN	DHX9	DEAH-box helicase 9	Nucleus	enzyme
DBLOH_HUMAN	DIABLO	diablo, IAP-binding mitochondrial protein	Cytoplasm	other
DICER_HUMAN	DICER1	dicer 1, ribonuclease type III	Cytoplasm	enzyme
DLDH_HUMAN	DLD	dihydrolipoamide dehydrogenase	Cytoplasm	enzyme	hexachlorophene
DNJA1_HUMAN	DNAJA1	DnaJ heat shock protein family (Hsp40) member A1	Nucleus	other
DNJA2_HUMAN	DNAJA2	DnaJ heat shock protein family (Hsp40) member A2	Nucleus	enzyme
DJB11_HUMAN	DNAJB11	DnaJ heat shock protein family (Hsp40) member B11	Cytoplasm	other
DNM1L_HUMAN	DNM1L	dynamin 1-like	Cytoplasm	enzyme
DYN2_HUMAN	DNM2	dynamin 2	Plasma Membrane	enzyme
DNMBP_HUMAN	DNMBP	dynamin binding protein	Cytoplasm	other
DNMT1_HUMAN	DNMT1	DNA (cytosine-5-)-methyltransferase 1	Nucleus	enzyme	5-azacytidine/decitabine, 5-azacytidine/cytarabine/decitabine, 5-azacytidine/sorafenib, decitabine/sorafenib, cladribine/cytarabine/decitabine, 5-azacytidine, decitabine
DOCK2_HUMAN	DOCK2	dedicator of cytokinesis 2	Cytoplasm	other
DOCK8_HUMAN	DOCK8	dedicator of cytokinesis 8	Cytoplasm	other
DPH5_HUMAN	DPH5	diphthamide biosynthesis 5	Cytoplasm	enzyme
DPP9_HUMAN	DPP9	dipeptidyl-peptidase 9	Cytoplasm	peptidase
DSG1_HUMAN	DSG1	desmoglein 1	Plasma Membrane	other
DESP_HUMAN	DSP	desmoplakin	Plasma Membrane	other
DUT_HUMAN	DUT	deoxyuridine triphosphatase	Nucleus	enzyme	TAS-114
DYHC1_HUMAN	DYNC1H1	dynein, cytoplasmic 1, heavy chain 1	Cytoplasm	peptidase
ECHM_HUMAN	ECHS1	enoyl-CoA hydratase, short chain, 1, mitochondrial	Cytoplasm	enzyme
EDRF1_HUMAN	EDRF1	erythroid differentiation regulatory factor 1	Other	other
EF1A1_HUMAN	EEF1A1	eukaryotic translation elongation factor 1 alpha 1	Cytoplasm	translation regulator
EF1B_HUMAN	EEF1B2	eukaryotic translation elongation factor 1 beta 2	Cytoplasm	translation regulator
EF1D_HUMAN	EEF1D	eukaryotic translation elongation factor 1 delta (guanine nucleotide exchange protein)	Cytoplasm	translation regulator
EF1G_HUMAN	EEF1G	eukaryotic translation elongation factor 1 gamma	Cytoplasm	translation regulator
EF2_HUMAN	EEF2	eukaryotic translation elongation factor 2	Cytoplasm	translation regulator
ETUD1_HUMAN	EFL1	elongation factor like GTPase 1	Cytoplasm	translation regulator
U5S1_HUMAN	EFTUD2	elongation factor Tu GTP binding domain containing 2	Nucleus	enzyme
EHD1_HUMAN	EHD1	EH domain containing 1	Cytoplasm	other
EI2BA_HUMAN	EIF2B1	eukaryotic translation initiation factor 2B subunit alpha	Cytoplasm	translation regulator
EI2BB_HUMAN	EIF2B2	eukaryotic translation initiation factor 2B subunit beta	Cytoplasm	other
EI2BE_HUMAN	EIF2B5	eukaryotic translation initiation factor 2B subunit epsilon	Cytoplasm	translation regulator
EIF3A_HUMAN	EIF3A	eukaryotic translation initiation factor 3 subunit A	Cytoplasm	other
EIF3B_HUMAN	EIF3B	eukaryotic translation initiation factor 3 subunit B	Cytoplasm	translation regulator
EIF3C_HUMAN	EIF3C	eukaryotic translation initiation factor 3 subunit C	Other	translation regulator
EIF3G_HUMAN	EIF3G	eukaryotic translation initiation factor 3 subunit G	Cytoplasm	other
EIF3I_HUMAN	EIF3I	eukaryotic translation initiation factor 3 subunit I	Cytoplasm	translation regulator
EIF3J_HUMAN	EIF3J	eukaryotic translation initiation factor 3 subunit J	Cytoplasm	translation regulator
EIF3K_HUMAN	EIF3K	eukaryotic translation initiation factor 3 subunit K	Cytoplasm	translation regulator
IF4A1_HUMAN	EIF4A1	eukaryotic translation initiation factor 4A1	Cytoplasm	translation regulator
IF4A2_HUMAN	EIF4A2	eukaryotic translation initiation factor 4A2	Cytoplasm	translation regulator
IF4A3_HUMAN	EIF4A3	eukaryotic translation initiation factor 4A3	Nucleus	enzyme
IF4B_HUMAN	EIF4B	eukaryotic translation initiation factor 4B	Cytoplasm	translation regulator
IF4G1_HUMAN	EIF4G1	eukaryotic translation initiation factor 4 gamma, 1	Cytoplasm	translation regulator
IF2P_HUMAN	EIF5B	eukaryotic translation initiation factor 5B	Cytoplasm	translation regulator
IF6_HUMAN	EIF6	eukaryotic translation initiation factor 6	Cytoplasm	translation regulator
ELAV1_HUMAN	ELAVL1	ELAV like RNA binding protein 1	Cytoplasm	other
ELMO1_HUMAN	ELMO1	engulfment and cell motility 1	Cytoplasm	other
ELP2_HUMAN	ELP2	elongator acetyltransferase complex subunit 2	Cytoplasm	other
SYEP_HUMAN	EPRS	glutamyl-prolyl-tRNA synthetase	Cytoplasm	enzyme
EPS15_HUMAN	EPS15	epidermal growth factor receptor pathway substrate 15	Cytoplasm	other
EP15R_HUMAN	EPS15L1	epidermal growth factor receptor pathway substrate 15-like 1	Plasma Membrane	other
ERAP1_HUMAN	ERAP1	endoplasmic reticulum aminopeptidase 1	Extracellular Space	peptidase
RB6I2_HUMAN	ERC1	ELKS/RAB6-interacting/CAST family member 1	Cytoplasm	other
ERP44_HUMAN	ERP44	endoplasmic reticulum protein 44	Cytoplasm	enzyme
ESYT1_HUMAN	ESYT1	extended synaptotagmin-like protein 1	Cytoplasm	other
ETS1_HUMAN	ETS1	v-ets avian erythroblastosis virus E26 oncogene homolog 1	Nucleus	transcription regulator
EWS_HUMAN	EWSR1	EWS RNA binding protein 1	Nucleus	other
EXOS4_HUMAN	EXOSC4	exosome component 4	Nucleus	enzyme
F207A_HUMAN	FAM207A	family with sequence similarity 207 member A	Other	other
MIP18_HUMAN	FAM96B	family with sequence similarity 96 member B	Cytoplasm	other
FACD2_HUMAN	FANCD2	Fanconi anemia complementation group D2	Nucleus	other
FANCI_HUMAN	FANCI	Fanconi anemia complementation group I	Nucleus	other
FAS_HUMAN	FASN	fatty acid synthase	Cytoplasm	enzyme	TVB-2640, orlistat, cerulenin
FBRL_HUMAN	FBL	fibrillarin	Nucleus	other
URP2_HUMAN	FERMT3	fermitin family member 3	Cytoplasm	enzyme
FKBP4_HUMAN	FKBP4	FK506 binding protein 4	Nucleus	enzyme
FKBP5_HUMAN	FKBP5	FK506 binding protein 5	Nucleus	enzyme
FNBP1_HUMAN	FNBP1	formin binding protein 1	Nucleus	enzyme
FNBP4_HUMAN	FNBP4	formin binding protein 4	Nucleus	other
FRIH_HUMAN	FTH1	ferritin, heavy polypeptide 1	Cytoplasm	enzyme
FRIL_HUMAN	FTL	ferritin, light polypeptide	Cytoplasm	enzyme
FUBP1_HUMAN	FUBP1	far upstream element (FUSE) binding protein 1	Nucleus	transcription regulator
FUS_HUMAN	FUS	FUS RNA binding protein	Nucleus	transcription regulator
FXR1_HUMAN	FXR1	fragile X mental retardation, autosomal homolog 1	Cytoplasm	other
G3BP1_HUMAN	G3BP1	GTPase activating protein (SH3 domain) binding protein 1	Nucleus	enzyme
GALK1_HUMAN	GALK1	galactokinase 1	Cytoplasm	kinase
GANAB_HUMAN	GANAB	glucosidase, alpha; neutral AB	Cytoplasm	enzyme	miglitol
G3P_HUMAN	GAPDH	glyceraldehyde-3-phosphate dehydrogenase	Cytoplasm	enzyme
SYG_HUMAN	GARS	glycyl-tRNA synthetase	Cytoplasm	enzyme
PUR2_HUMAN	GART	phosphoribosylglycinamide formyltransferase, phosphoribosylglycinamide synthetase, phosphoribosylaminoimidazole synthetase	Cytoplasm	enzyme	bevacizumab/pemetrexed, gemcitabine/pemetrexed, pemetrexed
GLGB_HUMAN	GBE1	glucan (1,4-alpha-), branching enzyme 1	Cytoplasm	enzyme
GBF1_HUMAN	GBF1	golgi brefeldin A resistant guanine nucleotide exchange factor 1	Cytoplasm	other
GRAN_HUMAN	GCA	grancalcin	Cytoplasm	other
GCDH_HUMAN	GCDH	glutaryl-CoA dehydrogenase	Cytoplasm	enzyme
GCN1L_HUMAN	GCN1	GCN1, eIF2 alpha kinase activator homolog	Cytoplasm	translation regulator
GEMI5_HUMAN	GEMIN5	gem nuclear organelle associated protein 5	Nucleus	other
PERQ2_HUMAN	GIGYF2	GRB10 interacting GYF protein 2	Cytoplasm	other
SLD5_HUMAN	GINS4	GINS complex subunit 4 (Sld5 homolog)	Nucleus	other
DHE3_HUMAN	GLUD1	glutamate dehydrogenase 1	Cytoplasm	enzyme
GMDS_HUMAN	GMDS	GDP-mannose 4,6-dehydratase	Cytoplasm	enzyme
GMIP_HUMAN	GMIP	GEM interacting protein	Cytoplasm	enzyme
GMPPB_HUMAN	GMPPB	GDP-mannose pyrophosphorylase B	Cytoplasm	enzyme
GBB2_HUMAN	GNB2	guanine nucleotide binding protein (G protein), beta polypeptide 2	Plasma Membrane	enzyme
GBLP_HUMAN	GNB2L1	guanine nucleotide binding protein (G protein), beta polypeptide 2-like 1	Cytoplasm	enzyme
GOGA3_HUMAN	GOLGA3	golgin A3	Cytoplasm	transporter
GLP3L_HUMAN	GOLPH3L	golgi phosphoprotein 3-like	Cytoplasm	other
GPN3_HUMAN	GPN3	GPN-loop GTPase 3	Cytoplasm	other
GRAP_HUMAN	GRAP	GRB2-related adaptor protein	Cytoplasm	other
GRB2_HUMAN	GRB2	growth factor receptor bound protein 2	Cytoplasm	other
GSTP1_HUMAN	GSTP1	glutathione S-transferase pi 1	Cytoplasm	enzyme
T2EB_HUMAN	GTF2E2	general transcription factor IIE subunit 2	Nucleus	transcription regulator
T2FA_HUMAN	GTF2F1	general transcription factor IIF subunit 1	Nucleus	transcription regulator
T2FB_HUMAN	GTF2F2	general transcription factor IIF subunit 2	Nucleus	transcription regulator
GTF2I_HUMAN	GTF2I	general transcription factor IIi	Nucleus	transcription regulator
HAT1_HUMAN	HAT1	histone acetyltransferase 1	Nucleus	enzyme
HBS1L_HUMAN	HBS1L	HBS1 like translational GTPase	Cytoplasm	translation regulator
HCLS1_HUMAN	HCLS1	hematopoietic cell-specific Lyn substrate 1	Nucleus	other
HDAC6_HUMAN	HDAC6	histone deacetylase 6	Nucleus	transcription regulator	tributyrin, belinostat, pyroxamide, bortezomib/vorinostat, ricolinostat, vorinostat, romidepsin
VIGLN_HUMAN	HDLBP	high density lipoprotein binding protein	Nucleus	transporter
HEAT3_HUMAN	HEATR3	HEAT repeat containing 3	Other	other
HTR5B_HUMAN	HEATR5B	HEAT repeat containing 5B	Cytoplasm	other
HECD1_HUMAN	HECTD1	HECT domain containing E3 ubiquitin protein ligase 1	Other	enzyme
HERC4_HUMAN	HERC4	HECT and RLD domain containing E3 ubiquitin protein ligase 4	Cytoplasm	enzyme
HIP1_HUMAN	HIP1	huntingtin interacting protein 1	Cytoplasm	other
HXK2_HUMAN	HK2	hexokinase 2	Cytoplasm	kinase
HMHA1_HUMAN	HMHA1	histocompatibility (minor) HA-1	Cytoplasm	transporter
ROA0_HUMAN	HNRNPA0	heterogeneous nuclear ribonucleoprotein A0	Nucleus	other
ROA1_HUMAN	HNRNPA1	heterogeneous nuclear ribonucleoprotein A1	Nucleus	other
ROA2_HUMAN	HNRNPA2B1	heterogeneous nuclear ribonucleoprotein A2/B1	Nucleus	other
ROA3_HUMAN	HNRNPA3	heterogeneous nuclear ribonucleoprotein A3	Nucleus	other
ROAA_HUMAN	HNRNPAB	heterogeneous nuclear ribonucleoprotein A/B	Nucleus	enzyme
HNRPD_HUMAN	HNRNPD	heterogeneous nuclear ribonucleoprotein D	Nucleus	transcription regulator
HNRDL_HUMAN	HNRNPDL	heterogeneous nuclear ribonucleoprotein D like	Nucleus	other
HNRPF_HUMAN	HNRNPF	heterogeneous nuclear ribonucleoprotein F	Nucleus	other
HNRH1_HUMAN	HNRNPH1	heterogeneous nuclear ribonucleoprotein H1 (H)	Nucleus	other
HNRH2_HUMAN	HNRNPH2	heterogeneous nuclear ribonucleoprotein H2 (H')	Nucleus	other
HNRH3_HUMAN	HNRNPH3	heterogeneous nuclear ribonucleoprotein H3 (2H9)	Nucleus	other
HNRPK_HUMAN	HNRNPK	heterogeneous nuclear ribonucleoprotein K	Nucleus	transcription regulator
HNRPR_HUMAN	HNRNPR	heterogeneous nuclear ribonucleoprotein R	Nucleus	other
HNRPU_HUMAN	HNRNPU	heterogeneous nuclear ribonucleoprotein U (scaffold attachment factor A)	Nucleus	transporter
HNRL1_HUMAN	HNRNPUL1	heterogeneous nuclear ribonucleoprotein U-like 1	Nucleus	other
HNRL2_HUMAN	HNRNPUL2	heterogeneous nuclear ribonucleoprotein U-like 2	Nucleus	other
HOOK3_HUMAN	HOOK3	hook microtubule-tethering protein 3	Cytoplasm	other
HORN_HUMAN	HRNR	hornerin	Cytoplasm	other
HCD2_HUMAN	HSD17B10	hydroxysteroid (17-beta) dehydrogenase 10	Cytoplasm	enzyme
HS90A_HUMAN	HSP90AA1	heat shock protein 90kDa alpha family class A member 1	Cytoplasm	enzyme	alvespimycin, retaspimycin, luminespib, cisplatin
HS90B_HUMAN	HSP90AB1	heat shock protein 90kDa alpha family class B member 1	Cytoplasm	enzyme	alvespimycin, retaspimycin, cisplatin
ENPL_HUMAN	HSP90B1	heat shock protein 90kDa beta family member 1	Cytoplasm	other	alvespimycin, retaspimycin, cisplatin
HSP74_HUMAN	HSPA4	heat shock protein family A (Hsp70) member 4	Cytoplasm	other
GRP78_HUMAN	HSPA5	heat shock protein family A (Hsp70) member 5	Cytoplasm	enzyme
HSP7C_HUMAN	HSPA8	heat shock protein family A (Hsp70) member 8	Cytoplasm	enzyme
GRP75_HUMAN	HSPA9	heat shock protein family A (Hsp70) member 9	Cytoplasm	other
HSPB1_HUMAN	HSPB1	heat shock protein family B (small) member 1	Cytoplasm	other
CH60_HUMAN	HSPD1	heat shock protein family D (Hsp60) member 1	Cytoplasm	enzyme
HS105_HUMAN	HSPH1	heat shock protein family H (Hsp110) member 1	Cytoplasm	other
HTSF1_HUMAN	HTATSF1	HIV-1 Tat specific factor 1	Nucleus	transcription regulator
HUWE1_HUMAN	HUWE1	HECT, UBA and WWE domain containing 1, E3 ubiquitin protein ligase	Nucleus	transcription regulator
HYOU1_HUMAN	HYOU1	hypoxia up-regulated 1	Cytoplasm	other
SYIC_HUMAN	IARS	isoleucyl-tRNA synthetase	Cytoplasm	enzyme
IDH3A_HUMAN	IDH3A	isocitrate dehydrogenase 3 (NAD+) alpha	Cytoplasm	enzyme
IGHM_HUMAN	IGHM	immunoglobulin heavy constant mu	Plasma Membrane	transmembrane receptor
LAC2_HUMAN	IGLC2	immunoglobulin lambda constant 2 (Kern-Oz- marker)	Extracellular Space	other
ELP1_HUMAN	IKBKAP	inhibitor of kappa light polypeptide gene enhancer in B-cells, kinase complex-associated protein	Cytoplasm	other
ILF2_HUMAN	ILF2	interleukin enhancer binding factor 2	Nucleus	transcription regulator
IMDH2_HUMAN	IMPDH2	IMP (inosine 5'-monophosphate) dehydrogenase 2	Cytoplasm	enzyme	thioguanine, VX-944, pegintron/ribavirin, interferon alfacon-1/ribavirin, interferon alfa-2b/ribavirin, mycophenolate mofetil, mycophenolic acid, ribavirin
I5P2_HUMAN	INPP5B	inositol polyphosphate-5-phosphatase B	Plasma Membrane	phosphatase
IPO11_HUMAN	IPO11	importin 11	Nucleus	transporter
IPO4_HUMAN	IPO4	importin 4	Nucleus	transporter
IPO5_HUMAN	IPO5	importin 5	Nucleus	transporter
IPO7_HUMAN	IPO7	importin 7	Nucleus	transporter
IPO8_HUMAN	IPO8	importin 8	Nucleus	transporter
IPO9_HUMAN	IPO9	importin 9	Nucleus	transporter
IQGA1_HUMAN	IQGAP1	IQ motif containing GTPase activating protein 1	Cytoplasm	other
ITPA_HUMAN	ITPA	inosine triphosphatase	Cytoplasm	enzyme
SYK_HUMAN	KARS	lysyl-tRNA synthetase	Cytoplasm	enzyme
KCAB2_HUMAN	KCNAB2	potassium channel, voltage gated subfamily A regulatory beta subunit 2	Plasma Membrane	ion channel
KHDR1_HUMAN	KHDRBS1	KH domain containing, RNA binding, signal transduction associated 1	Nucleus	transcription regulator	CWP232291
FUBP2_HUMAN	KHSRP	KH-type splicing regulatory protein	Nucleus	enzyme
ECM29_HUMAN	KIAA0368	KIAA0368	Cytoplasm	other
KIF15_HUMAN	KIF15	kinesin family member 15	Nucleus	other
KIF3A_HUMAN	KIF3A	kinesin family member 3A	Cytoplasm	enzyme
KIF3B_HUMAN	KIF3B	kinesin family member 3B	Cytoplasm	transporter
KINH_HUMAN	KIF5B	kinesin family member 5B	Cytoplasm	other
KNTC1_HUMAN	KNTC1	kinetochore associated 1	Nucleus	other
IMA4_HUMAN	KPNA3	karyopherin alpha 3 (importin alpha 4)	Nucleus	transporter
IMB1_HUMAN	KPNB1	karyopherin (importin) beta 1	Nucleus	transporter
LARP1_HUMAN	LARP1	La ribonucleoprotein domain family member 1	Cytoplasm	translation regulator
LARP7_HUMAN	LARP7	La ribonucleoprotein domain family member 7	Nucleus	other
SYLC_HUMAN	LARS	leucyl-tRNA synthetase	Cytoplasm	enzyme
LASP1_HUMAN	LASP1	LIM and SH3 protein 1	Cytoplasm	transporter
LDHA_HUMAN	LDHA	lactate dehydrogenase A	Cytoplasm	enzyme
LDHB_HUMAN	LDHB	lactate dehydrogenase B	Cytoplasm	enzyme
LEO1_HUMAN	LEO1	LEO1 homolog, Paf1/RNA polymerase II complex component	Nucleus	other
LMAN2_HUMAN	LMAN2	lectin, mannose-binding 2	Cytoplasm	transporter
LCAP_HUMAN	LNPEP	leucyl/cystinyl aminopeptidase	Cytoplasm	peptidase
LONM_HUMAN	LONP1	lon peptidase 1, mitochondrial	Cytoplasm	peptidase
LPXN_HUMAN	LPXN	leupaxin	Cytoplasm	transcription regulator
LRBA_HUMAN	LRBA	LPS-responsive vesicle trafficking, beach and anchor containing	Cytoplasm	other
LPPRC_HUMAN	LRPPRC	leucine rich pentatricopeptide repeat containing	Cytoplasm	other
LRRK1_HUMAN	LRRK1	leucine-rich repeat kinase 1	Cytoplasm	kinase
LTN1_HUMAN	LTN1	listerin E3 ubiquitin protein ligase 1	Nucleus	enzyme
LYPA1_HUMAN	LYPLA1	lysophospholipase I	Cytoplasm	enzyme
MPRD_HUMAN	M6PR	mannose-6-phosphate receptor (cation dependent)	Cytoplasm	transporter	alglucosidase alfa
MACF1_HUMAN	MACF1	microtubule-actin crosslinking factor 1	Cytoplasm	enzyme
M3K1_HUMAN	MAP3K1	mitogen-activated protein kinase kinase kinase 1, E3 ubiquitin protein ligase	Cytoplasm	kinase
MK01_HUMAN	MAPK1	mitogen-activated protein kinase 1	Cytoplasm	kinase	MAP kinase1 inhibitor, binimetinib, ulixertinib, LY-3007113, pexmetinib
MK03_HUMAN	MAPK3	mitogen-activated protein kinase 3	Cytoplasm	kinase	ulixertinib
MARE1_HUMAN	MAPRE1	microtubule associated protein RP/EB family member 1	Cytoplasm	other
MARE2_HUMAN	MAPRE2	microtubule associated protein RP/EB family member 2	Cytoplasm	other
SYMC_HUMAN	MARS	methionyl-tRNA synthetase	Cytoplasm	enzyme
METK2_HUMAN	MAT2A	methionine adenosyltransferase II, alpha	Cytoplasm	enzyme
MATR3_HUMAN	MATR3	matrin 3	Nucleus	other
MCM2_HUMAN	MCM2	minichromosome maintenance complex component 2	Nucleus	enzyme
MCM3_HUMAN	MCM3	minichromosome maintenance complex component 3	Nucleus	enzyme
MCM4_HUMAN	MCM4	minichromosome maintenance complex component 4	Nucleus	enzyme
MCM5_HUMAN	MCM5	minichromosome maintenance complex component 5	Nucleus	enzyme
MCM6_HUMAN	MCM6	minichromosome maintenance complex component 6	Nucleus	enzyme
MCM7_HUMAN	MCM7	minichromosome maintenance complex component 7	Nucleus	enzyme
MCMBP_HUMAN	MCMBP	minichromosome maintenance complex binding protein	Nucleus	other
MEMO1_HUMAN	MEMO1	mediator of cell motility 1	Cytoplasm	other
MEPCE_HUMAN	MEPCE	methylphosphate capping enzyme	Other	enzyme
MLH1_HUMAN	MLH1	mutL homolog 1	Nucleus	enzyme
MMS19_HUMAN	MMS19	MMS19 homolog, cytosolic iron-sulfur assembly component	Nucleus	transcription regulator
MSH2_HUMAN	MSH2	mutS homolog 2	Nucleus	enzyme
MSH6_HUMAN	MSH6	mutS homolog 6	Nucleus	enzyme
MTA2_HUMAN	MTA2	metastasis associated 1 family member 2	Nucleus	transcription regulator
MTAP_HUMAN	MTAP	methylthioadenosine phosphorylase	Nucleus	enzyme
C1TC_HUMAN	MTHFD1	methylenetetrahydrofolate dehydrogenase (NADP+ dependent) 1, methenyltetrahydrofolate cyclohydrolase, formyltetrahydrofolate synthetase	Cytoplasm	enzyme
MTOR_HUMAN	MTOR	mechanistic target of rapamycin (serine/threonine kinase)	Nucleus	kinase	ridaforolimus, OSI-027, methotrexate/sirolimus/tacrolimus, dactolisib, AZD2014, apitolisib, PKI-179, everolimus/exemestane, lenalidomide/temsirolimus, cc-223, PF-05212384, imatinib/sirolimus, cyclophosphamide/sirolimus, P7170, cyclosporine A/sirolimus/tacrolimus, everolimus/panobinostat, everolimus/pasireotide, mTOR inhibitor, PWT33597, PQR309, VS-5584, everolimus/prednisone, everolimus/sorafenib…
MYH9_HUMAN	MYH9	myosin, heavy chain 9, non-muscle	Cytoplasm	enzyme
MYL6_HUMAN	MYL6	myosin light chain 6	Cytoplasm	other
MYO1E_HUMAN	MYO1E	myosin IE	Cytoplasm	enzyme
NAGK_HUMAN	NAGK	N-acetylglucosamine kinase	Cytoplasm	kinase
NAMPT_HUMAN	NAMPT	nicotinamide phosphoribosyltransferase	Extracellular Space	cytokine
NP1L1_HUMAN	NAP1L1	nucleosome assembly protein 1-like 1	Nucleus	other
SYNC_HUMAN	NARS	asparaginyl-tRNA synthetase	Cytoplasm	enzyme
NASP_HUMAN	NASP	nuclear autoantigenic sperm protein (histone-binding)	Nucleus	other
NAT10_HUMAN	NAT10	N-acetyltransferase 10 (GCN5-related)	Nucleus	enzyme
NBEL2_HUMAN	NBEAL2	neurobeachin like 2	Cytoplasm	other
CND1_HUMAN	NCAPD2	non-SMC condensin I complex subunit D2	Nucleus	other
CND3_HUMAN	NCAPG	non-SMC condensin I complex subunit G	Nucleus	other
NCBP1_HUMAN	NCBP1	nuclear cap binding protein subunit 1	Nucleus	other
NCKPL_HUMAN	NCKAP1L	NCK associated protein 1 like	Plasma Membrane	other
NUCL_HUMAN	NCL	nucleolin	Nucleus	other
NDUS3_HUMAN	NDUFS3	NADH:ubiquinone oxidoreductase core subunit S3	Cytoplasm	enzyme
NEK9_HUMAN	NEK9	NIMA related kinase 9	Nucleus	kinase
NFKB1_HUMAN	NFKB1	nuclear factor of kappa light polypeptide gene enhancer in B-cells 1	Nucleus	transcription regulator	dexamethasone/thalidomide, bortezomib/dexamethasone/thalidomide, rituximab/thalidomide, bortezomib/thalidomide, prednisone/thalidomide, triflusal, thalidomide
NFKB2_HUMAN	NFKB2	nuclear factor of kappa light polypeptide gene enhancer in B-cells 2 (p49/p100)	Nucleus	transcription regulator
NDKA_HUMAN	NME1	NME/NM23 nucleoside diphosphate kinase 1	Cytoplasm	kinase
NOP14_HUMAN	NOP14	NOP14 nucleolar protein	Nucleus	other
NOP58_HUMAN	NOP58	NOP58 ribonucleoprotein	Nucleus	enzyme
NPL4_HUMAN	NPLOC4	NPL4 homolog, ubiquitin recognition factor	Nucleus	other
NRDC_HUMAN	NRDC	nardilysin convertase	Cytoplasm	peptidase
NSF1C_HUMAN	NSFL1C	NSFL1 (p97) cofactor (p47)	Cytoplasm	other
MAGG1_HUMAN	NSMCE3	NSE3 homolog, SMC5-SMC6 complex component	Nucleus	other
5NTC_HUMAN	NT5C2	5'-nucleotidase, cytosolic II	Cytoplasm	phosphatase
NUB1_HUMAN	NUB1	negative regulator of ubiquitin-like proteins 1	Nucleus	other
NUBP2_HUMAN	NUBP2	nucleotide binding protein 2	Nucleus	other
NUDT5_HUMAN	NUDT5	nudix hydrolase 5	Cytoplasm	phosphatase
NU107_HUMAN	NUP107	nucleoporin 107kDa	Nucleus	transporter
NU133_HUMAN	NUP133	nucleoporin 133kDa	Nucleus	transporter
NU155_HUMAN	NUP155	nucleoporin 155kDa	Nucleus	transporter
NU188_HUMAN	NUP188	nucleoporin 188kDa	Nucleus	other
NU205_HUMAN	NUP205	nucleoporin 205kDa	Nucleus	other
NUP93_HUMAN	NUP93	nucleoporin 93kDa	Nucleus	other
OLA1_HUMAN	OLA1	Obg-like ATPase 1	Cytoplasm	enzyme
OSTF1_HUMAN	OSTF1	osteoclast stimulating factor 1	Nucleus	transcription regulator
OTUB1_HUMAN	OTUB1	OTU deubiquitinase, ubiquitin aldehyde binding 1	Cytoplasm	enzyme
OTUD5_HUMAN	OTUD5	OTU deubiquitinase 5	Cytoplasm	enzyme
PDIA1_HUMAN	P4HB	prolyl 4-hydroxylase, beta polypeptide	Cytoplasm	enzyme
PABP1_HUMAN	PABPC1	poly(A) binding protein, cytoplasmic 1	Cytoplasm	translation regulator
PACN1_HUMAN	PACSIN1	protein kinase C and casein kinase substrate in neurons 1	Cytoplasm	kinase
PALD_HUMAN	PALD1	phosphatase domain containing, paladin 1	Cytoplasm	phosphatase
TOPK_HUMAN	PBK	PDZ binding kinase	Cytoplasm	kinase
PCBP1_HUMAN	PCBP1	poly(rC) binding protein 1	Nucleus	translation regulator
PCBP2_HUMAN	PCBP2	poly(rC) binding protein 2	Nucleus	other
PCNA_HUMAN	PCNA	proliferating cell nuclear antigen	Nucleus	enzyme
PDCD6_HUMAN	PDCD6	programmed cell death 6	Cytoplasm	other
PDC6I_HUMAN	PDCD6IP	programmed cell death 6 interacting protein	Cytoplasm	other
PDE12_HUMAN	PDE12	phosphodiesterase 12	Cytoplasm	other
PDIA6_HUMAN	PDIA6	protein disulfide isomerase family A member 6	Cytoplasm	enzyme
PDS5A_HUMAN	PDS5A	PDS5 cohesin associated factor A	Nucleus	other
PDXK_HUMAN	PDXK	pyridoxal (pyridoxine, vitamin B6) kinase	Cytoplasm	kinase
PEF1_HUMAN	PEF1	penta-EF-hand domain containing 1	Cytoplasm	other
PEX19_HUMAN	PEX19	peroxisomal biogenesis factor 19	Cytoplasm	other
PUR4_HUMAN	PFAS	phosphoribosylformylglycinamidine synthase	Cytoplasm	enzyme
SERA_HUMAN	PHGDH	phosphoglycerate dehydrogenase	Cytoplasm	enzyme
PK3CD_HUMAN	PIK3CD	phosphatidylinositol-4,5-bisphosphate 3-kinase catalytic subunit delta	Cytoplasm	kinase	SF 1126, PX-866, dactolisib, pictilisib, buparlisib, XL147, idelalisib, idelalisib/rituximab, PQR309, AMG-319, INCB050465, RP6530, INCB040093, acalisib
PK3CG_HUMAN	PIK3CG	phosphatidylinositol-4,5-bisphosphate 3-kinase catalytic subunit gamma	Cytoplasm	kinase	SF 1126, PX-866, PI3Kg inhibitor, dactolisib, pictilisib, buparlisib, XL147, PQR309, RP6530
PI3R4_HUMAN	PIK3R4	phosphoinositide-3-kinase regulatory subunit 4	Cytoplasm	kinase
PIPNB_HUMAN	PITPNB	phosphatidylinositol transfer protein beta	Cytoplasm	transporter
KPYM_HUMAN	PKM	pyruvate kinase, muscle	Cytoplasm	kinase	CAP-232
PLAP_HUMAN	PLAA	phospholipase A2-activating protein	Cytoplasm	other
PLCG2_HUMAN	PLCG2	phospholipase C gamma 2	Cytoplasm	enzyme
PLIN3_HUMAN	PLIN3	perilipin 3	Cytoplasm	other
P20D2_HUMAN	PM20D2	peptidase M20 domain containing 2	Nucleus	other
PMS2_HUMAN	PMS2	PMS1 homolog 2, mismatch repair system component	Nucleus	enzyme
DPOLA_HUMAN	POLA1	polymerase (DNA directed), alpha 1, catalytic subunit	Nucleus	enzyme	nelarabine, MB07133, cytarabine/fludarabine phosphate, cytarabine/daunorubicin, bortezomib/cladribine/rituximab, cyclophosphamide/fludarabine phosphate/rituximab, cladribine/cytarabine/daunorubicin, cytarabine/etoposide, cytarabine/etoposide/mitoxantrone, cytarabine/dexamethasone, cytarabine/mitoxantrone, cyclophosphamide/cytarabine/6-mercaptopurine, cladribine/cytarabine/filgrastim, clofarabine/…
DPOA2_HUMAN	POLA2	polymerase (DNA directed), alpha 2, accessory subunit	Nucleus	enzyme
DPOD1_HUMAN	POLD1	polymerase (DNA directed), delta 1, catalytic subunit	Nucleus	enzyme	nelarabine, MB07133, cytarabine/fludarabine phosphate, cytarabine/daunorubicin, cladribine/cytarabine/daunorubicin, cytarabine/etoposide, cytarabine/etoposide/mitoxantrone, cytarabine/dexamethasone, cytarabine/mitoxantrone, cyclophosphamide/cytarabine/6-mercaptopurine, cladribine/cytarabine/filgrastim, clofarabine/cyclophosphamide/etoposide, cytarabine/filgrastim/fludarabine phosphate, cladribine…
DPOE1_HUMAN	POLE	polymerase (DNA directed), epsilon, catalytic subunit	Nucleus	enzyme	nelarabine, bortezomib/cladribine/rituximab, gemcitabine/paclitaxel, cladribine/cytarabine/daunorubicin, gemcitabine/oxaliplatin, gemcitabine/vinorelbine, docetaxel/gemcitabine, docetaxel/gemcitabine/vincristine, cladribine/cytarabine/filgrastim, clofarabine/cyclophosphamide/etoposide, capecitabine/gemcitabine, gemcitabine/oxaliplatin/paclitaxel, cladribine/cytarabine/filgrastim/mitoxantrone, clo…
RPB1_HUMAN	POLR2A	polymerase (RNA) II (DNA directed) polypeptide A, 220kDa	Nucleus	enzyme
RPB2_HUMAN	POLR2B	polymerase (RNA) II (DNA directed) polypeptide B, 140kDa	Nucleus	enzyme
RPB3_HUMAN	POLR2C	polymerase (RNA) II (DNA directed) polypeptide C, 33kDa	Nucleus	enzyme
RPAB1_HUMAN	POLR2E	polymerase (RNA) II (DNA directed) polypeptide E, 25kDa	Nucleus	enzyme
RPAB3_HUMAN	POLR2H	polymerase (RNA) II (DNA directed) polypeptide H	Nucleus	enzyme
POTEE_HUMAN	POTEE/POTEF	POTE ankyrin domain family member F	Extracellular Space	other
PUR1_HUMAN	PPAT	phosphoribosyl pyrophosphate amidotransferase	Cytoplasm	enzyme	6-mercaptopurine, thioguanine, azathioprine, cyclophosphamide/cytarabine/6-mercaptopurine, amidophosphoribosyltransferase inhibitor
PPIA_HUMAN	PPIA	peptidylprolyl isomerase A	Cytoplasm	enzyme	N-methyl-4-Ile-cyclosporin
PPM1B_HUMAN	PPM1B	protein phosphatase, Mg2+/Mn2+ dependent 1B	Cytoplasm	phosphatase
PPM1G_HUMAN	PPM1G	protein phosphatase, Mg2+/Mn2+ dependent 1G	Nucleus	phosphatase
PP2AA_HUMAN	PPP2CA	protein phosphatase 2, catalytic subunit, alpha isozyme	Cytoplasm	phosphatase
2AAA_HUMAN	PPP2R1A	protein phosphatase 2 regulatory subunit A, alpha	Cytoplasm	phosphatase
2AAB_HUMAN	PPP2R1B	protein phosphatase 2 regulatory subunit A, beta	Plasma Membrane	phosphatase
2ABA_HUMAN	PPP2R2A	protein phosphatase 2 regulatory subunit B, alpha	Cytoplasm	phosphatase
PP4R1_HUMAN	PPP4R1	protein phosphatase 4 regulatory subunit 1	Other	phosphatase
PP4R2_HUMAN	PPP4R2	protein phosphatase 4 regulatory subunit 2	Cytoplasm	other
P4R3A_HUMAN	PPP4R3A	protein phosphatase 4 regulatory subunit 3A	Plasma Membrane	other
PPP6_HUMAN	PPP6C	protein phosphatase 6, catalytic subunit	Nucleus	phosphatase
PP6R1_HUMAN	PPP6R1	protein phosphatase 6 regulatory subunit 1	Cytoplasm	other
PP6R3_HUMAN	PPP6R3	protein phosphatase 6 regulatory subunit 3	Cytoplasm	other
PRDX1_HUMAN	PRDX1	peroxiredoxin 1	Cytoplasm	enzyme
PRDX2_HUMAN	PRDX2	peroxiredoxin 2	Cytoplasm	enzyme
PRDX3_HUMAN	PRDX3	peroxiredoxin 3	Cytoplasm	enzyme
PRDX4_HUMAN	PRDX4	peroxiredoxin 4	Cytoplasm	enzyme
PRDX6_HUMAN	PRDX6	peroxiredoxin 6	Cytoplasm	enzyme
GLU2B_HUMAN	PRKCSH	protein kinase C substrate 80K-H	Cytoplasm	enzyme
KPCD2_HUMAN	PRKD2	protein kinase D2	Cytoplasm	kinase
PRKDC_HUMAN	PRKDC	protein kinase, DNA-activated, catalytic polypeptide	Nucleus	kinase	P7170, CC-115, MSC2490484A
ANM1_HUMAN	PRMT1	protein arginine methyltransferase 1	Nucleus	enzyme
ANM5_HUMAN	PRMT5	protein arginine methyltransferase 5	Cytoplasm	enzyme
PRP39_HUMAN	PRPF39	pre-mRNA processing factor 39	Nucleus	other
PRP8_HUMAN	PRPF8	pre-mRNA processing factor 8	Nucleus	other
PRPS1_HUMAN	PRPS1	phosphoribosyl pyrophosphate synthetase 1	Cytoplasm	kinase
PRPS2_HUMAN	PRPS2	phosphoribosyl pyrophosphate synthetase 2	Cytoplasm	kinase
PRC2C_HUMAN	PRRC2C	proline-rich coiled-coil 2C	Other	other
PSD4_HUMAN	PSD4	pleckstrin and Sec7 domain containing 4	Cytoplasm	other
PSA1_HUMAN	PSMA1	proteasome subunit alpha 1	Cytoplasm	peptidase
PSA2_HUMAN	PSMA2	proteasome subunit alpha 2	Cytoplasm	peptidase
PSA3_HUMAN	PSMA3	proteasome subunit alpha 3	Cytoplasm	peptidase
PSA4_HUMAN	PSMA4	proteasome subunit alpha 4	Cytoplasm	peptidase
PSA5_HUMAN	PSMA5	proteasome subunit alpha 5	Cytoplasm	peptidase
PSA6_HUMAN	PSMA6	proteasome subunit alpha 6	Cytoplasm	peptidase
PSA7_HUMAN	PSMA7	proteasome subunit alpha 7	Cytoplasm	peptidase
PSB1_HUMAN	PSMB1	proteasome subunit beta 1	Cytoplasm	peptidase	carfilzomib, bortezomib/cladribine/rituximab, bortezomib/sorafenib, bortezomib/paclitaxel, bortezomib/dexamethasone, bortezomib/dexamethasone/doxorubicin, bortezomib/dexamethasone/lenalidomide, bortezomib/dexamethasone/thalidomide, carfilzomib/dexamethasone/lenalidomide, bortezomib/prednisone, bortezomib/doxorubicin, bortezomib/vorinostat, bortezomib/thalidomide, bortezomib/rituximab, bortezomib/…
PSB2_HUMAN	PSMB2	proteasome subunit beta 2	Cytoplasm	peptidase	carfilzomib, bortezomib/cladribine/rituximab, bortezomib/sorafenib, bortezomib/paclitaxel, bortezomib/dexamethasone, bortezomib/dexamethasone/doxorubicin, bortezomib/dexamethasone/lenalidomide, bortezomib/dexamethasone/thalidomide, carfilzomib/dexamethasone/lenalidomide, bortezomib/prednisone, bortezomib/doxorubicin, bortezomib/vorinostat, bortezomib/thalidomide, bortezomib/rituximab, bortezomib/…
PSB3_HUMAN	PSMB3	proteasome subunit beta 3	Cytoplasm	peptidase
PSB4_HUMAN	PSMB4	proteasome subunit beta 4	Cytoplasm	peptidase
PSB5_HUMAN	PSMB5	proteasome subunit beta 5	Cytoplasm	peptidase	carfilzomib, bortezomib/cladribine/rituximab, ixazomib citrate, bortezomib/sorafenib, bortezomib/paclitaxel, bortezomib/melphalan, bortezomib/dexamethasone, bortezomib/dexamethasone/doxorubicin, bortezomib/dexamethasone/lenalidomide, bortezomib/dexamethasone/thalidomide, carfilzomib/dexamethasone/lenalidomide, bortezomib/prednisone, bortezomib/doxorubicin, bortezomib/vorinostat, bortezomib/thalid…
PSB8_HUMAN	PSMB8	proteasome subunit beta 8	Cytoplasm	peptidase	carfilzomib, carfilzomib/dexamethasone/lenalidomide, carfilzomib/dexamethasone/rituximab
PSB9_HUMAN	PSMB9	proteasome subunit beta 9	Cytoplasm	peptidase	carfilzomib, carfilzomib/dexamethasone/lenalidomide, carfilzomib/dexamethasone/rituximab
PRS4_HUMAN	PSMC1	proteasome 26S subunit, ATPase 1	Nucleus	peptidase
PRS6A_HUMAN	PSMC3	proteasome 26S subunit, ATPase 3	Nucleus	transcription regulator
PRS6B_HUMAN	PSMC4	proteasome 26S subunit, ATPase 4	Nucleus	peptidase
PRS8_HUMAN	PSMC5	proteasome 26S subunit, ATPase 5	Nucleus	transcription regulator
PRS10_HUMAN	PSMC6	proteasome 26S subunit, ATPase 6	Nucleus	peptidase
PSMD1_HUMAN	PSMD1	proteasome 26S subunit, non-ATPase 1	Cytoplasm	other	bortezomib/cladribine/rituximab, bortezomib/sorafenib, bortezomib/paclitaxel, bortezomib/dexamethasone, bortezomib/dexamethasone/doxorubicin, bortezomib/dexamethasone/lenalidomide, bortezomib/dexamethasone/thalidomide, bortezomib/prednisone, bortezomib/doxorubicin, bortezomib/vorinostat, bortezomib/thalidomide, bortezomib/rituximab, bortezomib/dexamethasone/rituximab, bortezomib
PSD10_HUMAN	PSMD10	proteasome 26S subunit, non-ATPase 10	Cytoplasm	transcription regulator
PSD11_HUMAN	PSMD11	proteasome 26S subunit, non-ATPase 11	Cytoplasm	other
PSD13_HUMAN	PSMD13	proteasome 26S subunit, non-ATPase 13	Cytoplasm	peptidase
PSDE_HUMAN	PSMD14	proteasome 26S subunit, non-ATPase 14	Cytoplasm	peptidase
PSMD2_HUMAN	PSMD2	proteasome 26S subunit, non-ATPase 2	Cytoplasm	other	bortezomib/cladribine/rituximab, bortezomib/sorafenib, bortezomib/paclitaxel, bortezomib/dexamethasone, bortezomib/dexamethasone/doxorubicin, bortezomib/dexamethasone/lenalidomide, bortezomib/dexamethasone/thalidomide, bortezomib/prednisone, bortezomib/doxorubicin, bortezomib/vorinostat, bortezomib/thalidomide, bortezomib/rituximab, bortezomib/dexamethasone/rituximab, bortezomib
PSMD8_HUMAN	PSMD8	proteasome 26S subunit, non-ATPase 8	Cytoplasm	other
PSMD9_HUMAN	PSMD9	proteasome 26S subunit, non-ATPase 9	Cytoplasm	transcription regulator
PSME1_HUMAN	PSME1	proteasome activator subunit 1	Cytoplasm	other
PSME2_HUMAN	PSME2	proteasome activator subunit 2	Cytoplasm	peptidase
PSME3_HUMAN	PSME3	proteasome activator subunit 3	Cytoplasm	peptidase
PSPC1_HUMAN	PSPC1	paraspeckle component 1	Nucleus	other
PTBP1_HUMAN	PTBP1	polypyrimidine tract binding protein 1	Nucleus	enzyme
FAK2_HUMAN	PTK2B	protein tyrosine kinase 2 beta	Cytoplasm	kinase
P5CR1_HUMAN	PYCR1	pyrroline-5-carboxylate reductase 1	Cytoplasm	enzyme
P5CR2_HUMAN	PYCR2	pyrroline-5-carboxylate reductase family member 2	Cytoplasm	enzyme
P5CR3_HUMAN	PYCRL	pyrroline-5-carboxylate reductase-like	Cytoplasm	enzyme
RB11B_HUMAN	RAB11B	RAB11B, member RAS oncogene family	Cytoplasm	enzyme
RAB1B_HUMAN	RAB1B	RAB1B, member RAS oncogene family	Cytoplasm	other
RB3GP_HUMAN	RAB3GAP1	RAB3 GTPase activating protein catalytic subunit 1	Cytoplasm	other
RBGPR_HUMAN	RAB3GAP2	RAB3 GTPase activating non-catalytic protein subunit 2	Cytoplasm	enzyme
RAB7A_HUMAN	RAB7A	RAB7A, member RAS oncogene family	Cytoplasm	enzyme
PGTB2_HUMAN	RABGGTB	Rab geranylgeranyltransferase, beta subunit	Cytoplasm	enzyme
RD23B_HUMAN	RAD23B	RAD23 homolog B, nucleotide excision repair protein	Nucleus	other
RAE1L_HUMAN	RAE1	ribonucleic acid export 1	Nucleus	other
RAN_HUMAN	RAN	RAN, member RAS oncogene family	Nucleus	enzyme
RAP1B_HUMAN	RAP1B	RAP1B, member of RAS oncogene family	Cytoplasm	enzyme
SYRC_HUMAN	RARS	arginyl-tRNA synthetase	Cytoplasm	enzyme
RBBP4_HUMAN	RBBP4	retinoblastoma binding protein 4	Nucleus	enzyme
RBBP7_HUMAN	RBBP7	retinoblastoma binding protein 7	Nucleus	transcription regulator
RBM10_HUMAN	RBM10	RNA binding motif protein 10	Nucleus	other
RBM26_HUMAN	RBM26	RNA binding motif protein 26	Other	other
RBM6_HUMAN	RBM6	RNA binding motif protein 6	Nucleus	other
RFC2_HUMAN	RFC2	replication factor C subunit 2	Nucleus	other
RFC4_HUMAN	RFC4	replication factor C subunit 4	Nucleus	other
RFC5_HUMAN	RFC5	replication factor C subunit 5	Nucleus	enzyme
RN123_HUMAN	RNF123	ring finger protein 123	Cytoplasm	other
RN138_HUMAN	RNF138	ring finger protein 138, E3 ubiquitin protein ligase	Nucleus	enzyme
BRE1A_HUMAN	RNF20	ring finger protein 20	Nucleus	enzyme
BRE1B_HUMAN	RNF40	ring finger protein 40, E3 ubiquitin protein ligase	Cytoplasm	enzyme
MCES_HUMAN	RNMT	RNA (guanine-7-) methyltransferase	Nucleus	enzyme
RFA1_HUMAN	RPA1	replication protein A1	Nucleus	other
RFA2_HUMAN	RPA2	replication protein A2	Nucleus	other
RL10_HUMAN	RPL10	ribosomal protein L10	Cytoplasm	other
RL10A_HUMAN	RPL10A	ribosomal protein L10a	Nucleus	other
RL11_HUMAN	RPL11	ribosomal protein L11	Cytoplasm	other
RL12_HUMAN	RPL12	ribosomal protein L12	Nucleus	other
RL13_HUMAN	RPL13	ribosomal protein L13	Nucleus	other
RL15_HUMAN	RPL15	ribosomal protein L15	Cytoplasm	other
RL17_HUMAN	RPL17	ribosomal protein L17	Cytoplasm	other
RL18_HUMAN	RPL18	ribosomal protein L18	Cytoplasm	other
RL18A_HUMAN	RPL18A	ribosomal protein L18a	Cytoplasm	other
RL19_HUMAN	RPL19	ribosomal protein L19	Cytoplasm	other
RL21_HUMAN	RPL21	ribosomal protein L21	Cytoplasm	other
RL23A_HUMAN	RPL23A	ribosomal protein L23a	Cytoplasm	other
RL26_HUMAN	RPL26	ribosomal protein L26	Cytoplasm	other
RL28_HUMAN	RPL28	ribosomal protein L28	Cytoplasm	other
RL3_HUMAN	RPL3	ribosomal protein L3	Nucleus	other	omacetaxine mepesuccinate
RL4_HUMAN	RPL4	ribosomal protein L4	Cytoplasm	enzyme
RL5_HUMAN	RPL5	ribosomal protein L5	Cytoplasm	other
RL6_HUMAN	RPL6	ribosomal protein L6	Nucleus	other
RL7_HUMAN	RPL7	ribosomal protein L7	Nucleus	transcription regulator
RL7A_HUMAN	RPL7A	ribosomal protein L7a	Cytoplasm	other
RL8_HUMAN	RPL8	ribosomal protein L8	Other	other
RL9_HUMAN	RPL9	ribosomal protein L9	Nucleus	other
RLA0_HUMAN	RPLP0	ribosomal protein, large, P0	Cytoplasm	other
RLA1_HUMAN	RPLP1	ribosomal protein, large, P1	Cytoplasm	other
RS10_HUMAN	RPS10	ribosomal protein S10	Cytoplasm	other
RS13_HUMAN	RPS13	ribosomal protein S13	Cytoplasm	other
RS14_HUMAN	RPS14	ribosomal protein S14	Cytoplasm	translation regulator
RS18_HUMAN	RPS18	ribosomal protein S18	Cytoplasm	other
RS2_HUMAN	RPS2	ribosomal protein S2	Cytoplasm	other
RS23_HUMAN	RPS23	ribosomal protein S23	Cytoplasm	translation regulator
RS3_HUMAN	RPS3	ribosomal protein S3	Cytoplasm	enzyme
RS3A_HUMAN	RPS3A	ribosomal protein S3A	Nucleus	other
RS4X_HUMAN	RPS4X	ribosomal protein S4, X-linked	Cytoplasm	other
KS6A3_HUMAN	RPS6KA3	ribosomal protein S6 kinase, 90kDa, polypeptide 3	Cytoplasm	kinase
RS7_HUMAN	RPS7	ribosomal protein S7	Cytoplasm	other
RS8_HUMAN	RPS8	ribosomal protein S8	Cytoplasm	other
RS9_HUMAN	RPS9	ribosomal protein S9	Cytoplasm	translation regulator
RSSA_HUMAN	RPSA	ribosomal protein SA	Cytoplasm	translation regulator
RCD1_HUMAN	RQCD1	RCD1 required for cell differentiation1 homolog (S. pombe)	Cytoplasm	other
RIR2_HUMAN	RRM2	ribonucleotide reductase regulatory subunit M2	Nucleus	enzyme	cytarabine/fludarabine phosphate, bortezomib/cladribine/rituximab, gemcitabine/paclitaxel, cyclophosphamide/fludarabine phosphate/rituximab, cladribine/cytarabine/daunorubicin, gemcitabine/oxaliplatin, gemcitabine/vinorelbine, docetaxel/gemcitabine, docetaxel/gemcitabine/vincristine, cladribine/cytarabine/filgrastim, capecitabine/gemcitabine, gemcitabine/oxaliplatin/paclitaxel, cytarabine/filgras…
RRP12_HUMAN	RRP12	ribosomal RNA processing 12 homolog	Nucleus	other
RUVB1_HUMAN	RUVBL1	RuvB-like AAA ATPase 1	Nucleus	transcription regulator
RUVB2_HUMAN	RUVBL2	RuvB-like AAA ATPase 2	Nucleus	transcription regulator
SAMH1_HUMAN	SAMHD1	SAM domain and HD domain 1	Nucleus	enzyme
SAR1B_HUMAN	SAR1B	secretion associated, Ras related GTPase 1B	Cytoplasm	enzyme
SYSC_HUMAN	SARS	seryl-tRNA synthetase	Cytoplasm	enzyme
SART3_HUMAN	SART3	squamous cell carcinoma antigen recognized by T-cells 3	Nucleus	other
SCAM3_HUMAN	SCAMP3	secretory carrier membrane protein 3	Cytoplasm	transporter
NTKL_HUMAN	SCYL1	SCY1-like, kinase-like 1	Cytoplasm	kinase
SDF2L_HUMAN	SDF2L1	stromal cell-derived factor 2-like 1	Cytoplasm	other
SEC13_HUMAN	SEC13	SEC13 homolog, nuclear pore and COPII coat complex component	Cytoplasm	transporter
SC16A_HUMAN	SEC16A	SEC16 homolog A, endoplasmic reticulum export factor	Cytoplasm	phosphatase
SC23A_HUMAN	SEC23A	Sec23 homolog A, COPII coat complex component	Cytoplasm	transporter
SC23B_HUMAN	SEC23B	Sec23 homolog B, COPII coat complex component	Extracellular Space	transporter
S23IP_HUMAN	SEC23IP	SEC23 interacting protein	Cytoplasm	other
SC24B_HUMAN	SEC24B	SEC24 homolog B, COPII coat complex component	Cytoplasm	transporter
SC24C_HUMAN	SEC24C	SEC24 homolog C, COPII coat complex component	Cytoplasm	transporter
SC24D_HUMAN	SEC24D	SEC24 homolog D, COPII coat complex component	Cytoplasm	transporter
SC31A_HUMAN	SEC31A	SEC31 homolog A, COPII coat complex component	Cytoplasm	other
SPS1_HUMAN	SEPHS1	selenophosphate synthetase 1	Other	enzyme
PAIRB_HUMAN	SERBP1	SERPINE1 mRNA binding protein 1	Cytoplasm	other
SET_HUMAN	SET	SET nuclear proto-oncogene	Nucleus	phosphatase
SF3A1_HUMAN	SF3A1	splicing factor 3a subunit 1	Nucleus	other
SF3B1_HUMAN	SF3B1	splicing factor 3b subunit 1	Nucleus	other
SF3B2_HUMAN	SF3B2	splicing factor 3b subunit 2	Nucleus	other
SF3B3_HUMAN	SF3B3	splicing factor 3b subunit 3	Nucleus	other
SFPQ_HUMAN	SFPQ	splicing factor proline/glutamine-rich	Nucleus	other
SIR1_HUMAN	SIRT1	sirtuin 1	Nucleus	transcription regulator
SK2L2_HUMAN	SKIV2L2	Ski2 like RNA helicase 2	Nucleus	other
SKP1_HUMAN	SKP1	S-phase kinase-associated protein 1	Nucleus	transcription regulator
NADAP_HUMAN	SLC4A1AP	solute carrier family 4 (anion exchanger), member 1, adaptor protein	Nucleus	transporter
SMCA4_HUMAN	SMARCA4	SWI/SNF related, matrix associated, actin dependent regulator of chromatin, subfamily a, member 4	Nucleus	transcription regulator
SMRC1_HUMAN	SMARCC1	SWI/SNF related, matrix associated, actin dependent regulator of chromatin, subfamily c, member 1	Nucleus	transcription regulator
SMC1A_HUMAN	SMC1A	structural maintenance of chromosomes 1A	Nucleus	transporter
SMC2_HUMAN	SMC2	structural maintenance of chromosomes 2	Nucleus	transporter
SMC3_HUMAN	SMC3	structural maintenance of chromosomes 3	Nucleus	other
SMC4_HUMAN	SMC4	structural maintenance of chromosomes 4	Nucleus	transporter
SMG1_HUMAN	SMG1	SMG1 phosphatidylinositol 3-kinase-related kinase	Cytoplasm	kinase
SND1_HUMAN	SND1	staphylococcal nuclease and tudor domain containing 1	Nucleus	enzyme
U520_HUMAN	SNRNP200	small nuclear ribonucleoprotein, U5 200kDa subunit	Nucleus	enzyme
RU17_HUMAN	SNRNP70	small nuclear ribonucleoprotein, U1 70kDa subunit	Nucleus	other
SNRPA_HUMAN	SNRPA	small nuclear ribonucleoprotein polypeptide A	Nucleus	other
RU2A_HUMAN	SNRPA1	small nuclear ribonucleoprotein polypeptide A'	Nucleus	other
RSMB_HUMAN	SNRPB	small nuclear ribonucleoprotein polypeptides B and B1	Nucleus	other
RU2B_HUMAN	SNRPB2	small nuclear ribonucleoprotein polypeptide B	Nucleus	other
SORL_HUMAN	SORL1	sortilin-related receptor, L(DLR class) A repeats containing	Cytoplasm	transporter
JIP4_HUMAN	SPAG9	sperm associated antigen 9	Cytoplasm	other
SPC24_HUMAN	SPC24	SPC24, NDC80 kinetochore complex component	Cytoplasm	other
SPC25_HUMAN	SPC25	SPC25, NDC80 kinetochore complex component	Cytoplasm	other
SORCN_HUMAN	SRI	sorcin	Cytoplasm	transporter
SPEE_HUMAN	SRM	spermidine synthase	Cytoplasm	enzyme
SRP14_HUMAN	SRP14	signal recognition particle 14kDa	Cytoplasm	other
SRP54_HUMAN	SRP54	signal recognition particle 54kDa	Cytoplasm	other
SRP68_HUMAN	SRP68	signal recognition particle 68kDa	Nucleus	other
SRP72_HUMAN	SRP72	signal recognition particle 72kDa	Nucleus	kinase
SRRT_HUMAN	SRRT	serrate, RNA effector molecule	Nucleus	other
SRSF1_HUMAN	SRSF1	serine/arginine-rich splicing factor 1	Nucleus	other
SRSF2_HUMAN	SRSF2	serine/arginine-rich splicing factor 2	Nucleus	transcription regulator
SRSF3_HUMAN	SRSF3	serine/arginine-rich splicing factor 3	Nucleus	other
LA_HUMAN	SSB	Sjogren syndrome antigen B	Nucleus	enzyme
F10A1_HUMAN	ST13	suppression of tumorigenicity 13 (colon carcinoma) (Hsp70 interacting protein)	Cytoplasm	other
STA5B_HUMAN	STAT5B	signal transducer and activator of transcription 5B	Nucleus	transcription regulator
STIP1_HUMAN	STIP1	stress induced phosphoprotein 1	Cytoplasm	other	lavendustin C
STK4_HUMAN	STK4	serine/threonine kinase 4	Cytoplasm	kinase
STX12_HUMAN	STX12	syntaxin 12	Cytoplasm	other
STX4_HUMAN	STX4	syntaxin 4	Plasma Membrane	transporter
STX7_HUMAN	STX7	syntaxin 7	Plasma Membrane	transporter
SPT5H_HUMAN	SUPT5H	SPT5 homolog, DSIF elongation factor subunit	Nucleus	transcription regulator
SPT6H_HUMAN	SUPT6H	SPT6 homolog, histone chaperone	Nucleus	transcription regulator
KSYK_HUMAN	SYK	spleen tyrosine kinase	Cytoplasm	kinase	R-348, fostamatinib, cerdulatinib, TAK-659, entospletinib
SYMPK_HUMAN	SYMPK	symplekin	Cytoplasm	other
HNRPQ_HUMAN	SYNCRIP	synaptotagmin binding, cytoplasmic RNA interacting protein	Nucleus	other
SYNE1_HUMAN	SYNE1	spectrin repeat containing, nuclear envelope 1	Nucleus	other
SYNE2_HUMAN	SYNE2	spectrin repeat containing, nuclear envelope 2	Nucleus	other
TACC3_HUMAN	TACC3	transforming, acidic coiled-coil containing protein 3	Nucleus	other
RBP56_HUMAN	TAF15	TATA-box binding protein associated factor 15	Nucleus	other
TARB1_HUMAN	TARBP1	TAR (HIV-1) RNA binding protein 1	Nucleus	transcription regulator
TADBP_HUMAN	TARDBP	TAR DNA binding protein	Nucleus	transcription regulator
TBCD_HUMAN	TBCD	tubulin folding cofactor D	Cytoplasm	other
TBL1R_HUMAN	TBL1XR1	transducin (beta)-like 1 X-linked receptor 1	Nucleus	transcription regulator
TCPA_HUMAN	TCP1	t-complex 1	Cytoplasm	other
TFG_HUMAN	TFG	TRK-fused gene	Cytoplasm	other
TFR1_HUMAN	TFRC	transferrin receptor	Plasma Membrane	transporter
THUM1_HUMAN	THUMPD1	THUMP domain containing 1	Other	other
TIAR_HUMAN	TIAL1	TIA1 cytotoxic granule-associated RNA binding protein-like 1	Nucleus	transcription regulator
TIM_HUMAN	TIMELESS	timeless circadian clock	Nucleus	other
TIPRL_HUMAN	TIPRL	TOR signaling pathway regulator	Cytoplasm	other
ZO2_HUMAN	TJP2	tight junction protein 2	Plasma Membrane	kinase
TLN1_HUMAN	TLN1	talin 1	Plasma Membrane	other
TMA16_HUMAN	TMA16	translation machinery associated 16 homolog	Nucleus	other
TMEDA_HUMAN	TMED10	transmembrane p24 trafficking protein 10	Cytoplasm	transporter
LAP2A_HUMAN	TMPO	thymopoietin	Nucleus	other
TNPO1_HUMAN	TNPO1	transportin 1	Nucleus	transporter
TNPO2_HUMAN	TNPO2	transportin 2	Nucleus	transporter
TNPO3_HUMAN	TNPO3	transportin 3	Cytoplasm	other
TNC18_HUMAN	TNRC18	trinucleotide repeat containing 18	Nucleus	other
TOM34_HUMAN	TOMM34	translocase of outer mitochondrial membrane 34	Cytoplasm	other
PRPK_HUMAN	TP53RK	TP53 regulating kinase	Nucleus	kinase
TPM3_HUMAN	TPM3	tropomyosin 3	Cytoplasm	other
TPP2_HUMAN	TPP2	tripeptidyl peptidase II	Cytoplasm	peptidase
TRAP1_HUMAN	TRAP1	TNF receptor-associated protein 1	Cytoplasm	enzyme
TIF1B_HUMAN	TRIM28	tripartite motif containing 28	Nucleus	transcription regulator
CIP4_HUMAN	TRIP10	thyroid hormone receptor interactor 10	Cytoplasm	other
RO60_HUMAN	TROVE2	TROVE domain family member 2	Nucleus	other
TSN_HUMAN	TSN	translin	Nucleus	other
TTC1_HUMAN	TTC1	tetratricopeptide repeat domain 1	Cytoplasm	other
TTC37_HUMAN	TTC37	tetratricopeptide repeat domain 37	Nucleus	other
TTC9C_HUMAN	TTC9C	tetratricopeptide repeat domain 9C	Other	other
TBA1B_HUMAN	TUBA1B	tubulin alpha 1b	Cytoplasm	other
TBA4A_HUMAN	TUBA4A	tubulin alpha 4a	Cytoplasm	other	epothilone B, colchicine/probenecid, larotaxel, eribulin, davunetide, vintafolide, milataxel, cevipabulin, cabazitaxel, gemcitabine/paclitaxel, docetaxel/prednisone, capecitabine/docetaxel, paclitaxel/trastuzumab, cabazitaxel/prednisone, cyclophosphamide/prednisone/vincristine, docetaxel/hydrocortisone, cyclophosphamide/docetaxel, gemcitabine/vinorelbine, cyclophosphamide/daunorubicin/imatinib/pr…
TBB5_HUMAN	TUBB	tubulin beta class I	Cytoplasm	other	ixabepilone
TBB3_HUMAN	TUBB3	tubulin beta 3 class III	Cytoplasm	other	epothilone B, ixabepilone, colchicine/probenecid, larotaxel, ABT-751, eribulin, simotaxel, davunetide, vintafolide, milataxel, cevipabulin, gemcitabine/paclitaxel, docetaxel/prednisone, capecitabine/docetaxel, paclitaxel/trastuzumab, capecitabine/ixabepilone, cyclophosphamide/prednisone/vincristine, docetaxel/hydrocortisone, cyclophosphamide/docetaxel, gemcitabine/vinorelbine, cyclophosphamide/da…
TBB4A_HUMAN	TUBB4A	tubulin beta 4A class IVa	Cytoplasm	other	epothilone B, colchicine/probenecid, larotaxel, ABT-751, eribulin, simotaxel, davunetide, vintafolide, milataxel, cevipabulin, gemcitabine/paclitaxel, docetaxel/prednisone, capecitabine/docetaxel, paclitaxel/trastuzumab, cyclophosphamide/prednisone/vincristine, docetaxel/hydrocortisone, cyclophosphamide/docetaxel, gemcitabine/vinorelbine, cyclophosphamide/daunorubicin/imatinib/prednisone/vincrist…
TBB4B_HUMAN	TUBB4B	tubulin beta 4B class IVb	Cytoplasm	other	epothilone B, colchicine/probenecid, larotaxel, ABT-751, eribulin, simotaxel, davunetide, vintafolide, milataxel, cevipabulin, gemcitabine/paclitaxel, docetaxel/prednisone, capecitabine/docetaxel, paclitaxel/trastuzumab, cyclophosphamide/prednisone/vincristine, docetaxel/hydrocortisone, cyclophosphamide/docetaxel, gemcitabine/vinorelbine, cyclophosphamide/daunorubicin/imatinib/prednisone/vincrist…
EFTU_HUMAN	TUFM	Tu translation elongation factor, mitochondrial	Cytoplasm	translation regulator
TXND5_HUMAN	TXNDC5	thioredoxin domain containing 5 (endoplasmic reticulum)	Cytoplasm	enzyme
TXND9_HUMAN	TXNDC9	thioredoxin domain containing 9	Cytoplasm	other
TYSY_HUMAN	TYMS	thymidylate synthetase	Nucleus	enzyme	flucytosine, 5-fluorouracil, tegafur, trimethoprim, cyclophosphamide/epirubicin/5-fluorouracil, pralatrexate, 5-fluorouracil/oxaliplatin, capecitabine/irinotecan, 5-fluorouracil/irinotecan, capecitabine/docetaxel, capecitabine/lapatinib, capecitabine/ixabepilone, bevacizumab/5-fluorouracil, bevacizumab/capecitabine/oxaliplatin, cyclophosphamide/docetaxel/epirubicin/5-fluorouracil/trastuzumab, cap…
U2AF1_HUMAN	U2AF1/U2AF1L5	U2 small nuclear RNA auxiliary factor 1	Nucleus	other
U2AF2_HUMAN	U2AF2	U2 small nuclear RNA auxiliary factor 2	Nucleus	other
SR140_HUMAN	U2SURP	U2 snRNP-associated SURP domain containing	Nucleus	other
UBA1_HUMAN	UBA1	ubiquitin-like modifier activating enzyme 1	Cytoplasm	enzyme
RL40_HUMAN	UBA52	ubiquitin A-52 residue ribosomal protein fusion product 1	Cytoplasm	enzyme
UBP2L_HUMAN	UBAP2L	ubiquitin associated protein 2 like	Other	other
UBE3A_HUMAN	UBE3A	ubiquitin protein ligase E3A	Nucleus	enzyme
UBE3C_HUMAN	UBE3C	ubiquitin protein ligase E3C	Nucleus	enzyme
UBQL1_HUMAN	UBQLN1	ubiquilin 1	Cytoplasm	other
UBQL4_HUMAN	UBQLN4	ubiquilin 4	Cytoplasm	other
UBR5_HUMAN	UBR5	ubiquitin protein ligase E3 component n-recognin 5	Nucleus	enzyme
UGGG1_HUMAN	UGGT1	UDP-glucose glycoprotein glucosyltransferase 1	Cytoplasm	enzyme
UN45A_HUMAN	UNC45A	unc-45 myosin chaperone A	Plasma Membrane	other
RENT1_HUMAN	UPF1	UPF1 regulator of nonsense transcripts homolog (yeast)	Nucleus	enzyme
USO1_HUMAN	USO1	USO1 vesicle transport factor	Cytoplasm	transporter
UBP11_HUMAN	USP11	ubiquitin specific peptidase 11	Nucleus	peptidase
UBP13_HUMAN	USP13	ubiquitin specific peptidase 13 (isopeptidase T-3)	Other	peptidase
UBP15_HUMAN	USP15	ubiquitin specific peptidase 15	Cytoplasm	peptidase
UBP24_HUMAN	USP24	ubiquitin specific peptidase 24	Other	peptidase
UBP28_HUMAN	USP28	ubiquitin specific peptidase 28	Nucleus	peptidase
UBP34_HUMAN	USP34	ubiquitin specific peptidase 34	Extracellular Space	peptidase
UBP47_HUMAN	USP47	ubiquitin specific peptidase 47	Cytoplasm	peptidase
UBP48_HUMAN	USP48	ubiquitin specific peptidase 48	Plasma Membrane	peptidase
UBP5_HUMAN	USP5	ubiquitin specific peptidase 5 (isopeptidase T)	Cytoplasm	peptidase
UBP7_HUMAN	USP7	ubiquitin specific peptidase 7 (herpes virus-associated)	Nucleus	peptidase
USP9X_HUMAN	USP9X	ubiquitin specific peptidase 9, X-linked	Plasma Membrane	peptidase
SYVC_HUMAN	VARS	valyl-tRNA synthetase	Cytoplasm	enzyme
VAT1_HUMAN	VAT1	vesicle amine transport 1	Plasma Membrane	transporter
VAV_HUMAN	VAV1	vav guanine nucleotide exchange factor 1	Nucleus	transcription regulator
TERA_HUMAN	VCP	valosin containing protein	Cytoplasm	enzyme	CB-5083
VPS16_HUMAN	VPS16	VPS16, CORVET/HOPS core subunit	Cytoplasm	transporter
VPS18_HUMAN	VPS18	VPS18 CORVET/HOPS core subunit	Cytoplasm	transporter
VPS28_HUMAN	VPS28	vacuolar protein sorting 28 homolog (S. cerevisiae)	Cytoplasm	transporter
VPS29_HUMAN	VPS29	VPS29 retromer complex component	Cytoplasm	transporter
VPS35_HUMAN	VPS35	VPS35 retromer complex component	Cytoplasm	transporter
WAPL_HUMAN	WAPL	WAPL cohesin release factor	Nucleus	other
WBP2_HUMAN	WBP2	WW domain binding protein 2	Cytoplasm	other
WDFY4_HUMAN	WDFY4	WDFY family member 4	Other	other
WDR11_HUMAN	WDR11	WD repeat domain 11	Cytoplasm	other
WDR6_HUMAN	WDR6	WD repeat domain 6	Cytoplasm	other
WDR61_HUMAN	WDR61	WD repeat domain 61	Nucleus	other
MEP50_HUMAN	WDR77	WD repeat domain 77	Nucleus	transcription regulator
WDR82_HUMAN	WDR82	WD repeat domain 82	Nucleus	other
WAP53_HUMAN	WRAP53	WD repeat containing, antisense to TP53	Nucleus	other
XPO1_HUMAN	XPO1	exportin 1	Nucleus	transporter	selinexor
XPO4_HUMAN	XPO4	exportin 4	Nucleus	transporter
XPO5_HUMAN	XPO5	exportin 5	Nucleus	transporter
XPO7_HUMAN	XPO7	exportin 7	Nucleus	transporter
XPOT_HUMAN	XPOT	exportin, tRNA	Nucleus	other
XRCC5_HUMAN	XRCC5	X-ray repair complementing defective repair in Chinese hamster cells 5	Nucleus	enzyme
XRCC6_HUMAN	XRCC6	X-ray repair complementing defective repair in Chinese hamster cells 6	Nucleus	enzyme
XRN2_HUMAN	XRN2	5'-3' exoribonuclease 2	Nucleus	enzyme
SYYC_HUMAN	YARS	tyrosyl-tRNA synthetase	Cytoplasm	enzyme
YBOX1_HUMAN	YBX1	Y-box binding protein 1	Nucleus	transcription regulator
YLPM1_HUMAN	YLPM1	YLP motif containing 1	Nucleus	transcription regulator
YTDC2_HUMAN	YTHDC2	YTH domain containing 2	Cytoplasm	enzyme
1433B_HUMAN	YWHAB	tyrosine 3-monooxygenase/tryptophan 5-monooxygenase activation protein, beta	Cytoplasm	transcription regulator
1433E_HUMAN	YWHAE	tyrosine 3-monooxygenase/tryptophan 5-monooxygenase activation protein, epsilon	Cytoplasm	other
1433G_HUMAN	YWHAG	tyrosine 3-monooxygenase/tryptophan 5-monooxygenase activation protein, gamma	Cytoplasm	other
1433F_HUMAN	YWHAH	tyrosine 3-monooxygenase/tryptophan 5-monooxygenase activation protein, eta	Cytoplasm	transcription regulator
1433T_HUMAN	YWHAQ	tyrosine 3-monooxygenase/tryptophan 5-monooxygenase activation protein, theta	Cytoplasm	other
1433Z_HUMAN	YWHAZ	tyrosine 3-monooxygenase/tryptophan 5-monooxygenase activation protein, zeta	Cytoplasm	enzyme
ARCH_HUMAN	ZBTB8OS	zinc finger and BTB domain containing 8 opposite strand	Cytoplasm	other
ZC3H4_HUMAN	ZC3H4	zinc finger CCCH-type containing 4	Other	other
ZCHC8_HUMAN	ZCCHC8	zinc finger, CCHC domain containing 8	Nucleus	other
ZPR1_HUMAN	ZPR1	ZPR1 zinc finger	Nucleus	other

## Sheet: Daudi
© 2000-2016 QIAGEN. All rights reserved.
ID	Symbol	Entrez Gene Name	Location	Type(s)	Drug(s)
AAGAB_HUMAN	AAGAB	alpha- and gamma-adaptin binding protein	Cytoplasm	other
AAMP_HUMAN	AAMP	angio associated migratory cell protein	Plasma Membrane	other
SYAC_HUMAN	AARS	alanyl-tRNA synthetase	Cytoplasm	enzyme
AASD1_HUMAN	AARSD1	alanyl-tRNA synthetase domain containing 1	Nucleus	enzyme
AATF_HUMAN	AATF	apoptosis antagonizing transcription factor	Nucleus	transcription regulator
ABCE1_HUMAN	ABCE1	ATP binding cassette subfamily E member 1	Cytoplasm	transporter
ABI1_HUMAN	ABI1	abl interactor 1	Cytoplasm	other
ABI3_HUMAN	ABI3	ABI family member 3	Plasma Membrane	other
ABR_HUMAN	ABR	active BCR-related	Cytoplasm	other
ABT1_HUMAN	ABT1	activator of basal transcription 1	Nucleus	transcription regulator
ACACA_HUMAN	ACACA	acetyl-CoA carboxylase alpha	Cytoplasm	enzyme
ACAD9_HUMAN	ACAD9	acyl-CoA dehydrogenase family member 9	Cytoplasm	enzyme
ACADM_HUMAN	ACADM	acyl-CoA dehydrogenase, C-4 to C-12 straight chain	Cytoplasm	enzyme
ACDSB_HUMAN	ACADSB	acyl-CoA dehydrogenase, short/branched chain	Cytoplasm	enzyme
ACADV_HUMAN	ACADVL	acyl-CoA dehydrogenase, very long chain	Cytoplasm	enzyme
ACAP1_HUMAN	ACAP1	ArfGAP with coiled-coil, ankyrin repeat and PH domains 1	Plasma Membrane	other
ACAP2_HUMAN	ACAP2	ArfGAP with coiled-coil, ankyrin repeat and PH domains 2	Nucleus	other
GCP60_HUMAN	ACBD3	acyl-CoA binding domain containing 3	Cytoplasm	other
ACLY_HUMAN	ACLY	ATP citrate lyase	Cytoplasm	enzyme
ACOX1_HUMAN	ACOX1	acyl-CoA oxidase 1, palmitoyl	Cytoplasm	enzyme
ACSL3_HUMAN	ACSL3	acyl-CoA synthetase long-chain family member 3	Cytoplasm	enzyme
ACTB_HUMAN	ACTB	actin, beta	Cytoplasm	other
ACTBL_HUMAN	ACTBL2	actin, beta-like 2	Nucleus	other
ACTC_HUMAN	ACTC1	actin, alpha, cardiac muscle 1	Cytoplasm	enzyme
ACTG_HUMAN	ACTG1	actin gamma 1	Cytoplasm	other
ACL6A_HUMAN	ACTL6A	actin like 6A	Nucleus	other
ACL7A_HUMAN	ACTL7A	actin like 7A	Nucleus	other
ACTN4_HUMAN	ACTN4	actinin, alpha 4	Cytoplasm	transcription regulator
ACTZ_HUMAN	ACTR1A	ARP1 actin-related protein 1 homolog A, centractin alpha (yeast)	Cytoplasm	other
ARP2_HUMAN	ACTR2	ARP2 actin-related protein 2 homolog (yeast)	Plasma Membrane	other
ARP3_HUMAN	ACTR3	ARP3 actin-related protein 3 homolog (yeast)	Plasma Membrane	other
DSRAD_HUMAN	ADAR	adenosine deaminase, RNA-specific	Nucleus	enzyme
ADDA_HUMAN	ADD1	adducin 1	Cytoplasm	other
ADK_HUMAN	ADK	adenosine kinase	Nucleus	kinase	adenosine kinase inhibitor, pegintron/ribavirin, PEG-interferon alfa-2a/ribavirin, nitazoxanide/peginterferon alfa-2a/ribavirin, interferon alfacon-1/ribavirin, interferon alfa-2b/ribavirin, ribavirin
AEDO_HUMAN	ADO	2-aminoethanethiol (cysteamine) dioxygenase	Cytoplasm	other
ADRM1_HUMAN	ADRM1	adhesion regulating molecule 1	Plasma Membrane	other
PUR8_HUMAN	ADSL	adenylosuccinate lyase	Cytoplasm	enzyme
AGGF1_HUMAN	AGGF1	angiogenic factor with G-patch and FHA domains 1	Cytoplasm	other
GDE_HUMAN	AGL	amylo-alpha-1, 6-glucosidase, 4-alpha-glucanotransferase	Cytoplasm	enzyme
ADAS_HUMAN	AGPS	alkylglycerone phosphate synthase	Cytoplasm	enzyme
ELYS_HUMAN	AHCTF1	AT-hook containing transcription factor 1	Nucleus	transcription regulator
SAHH_HUMAN	AHCY	adenosylhomocysteinase	Cytoplasm	enzyme	9-(2',3'-dihydroxycyclopent-4'-enyl)adenine, 3-deazaneplanocin, neplanocin A, 3-deazaaristeromycin, cyanovirin-N, 6'-C-methylneplanocin A
SAHH3_HUMAN	AHCYL2	adenosylhomocysteinase like 2	Other	enzyme
AHSA1_HUMAN	AHSA1	AHA1, activator of heat shock 90kDa protein ATPase homolog 1 (yeast)	Cytoplasm	other
AIFM1_HUMAN	AIFM1	apoptosis inducing factor, mitochondria associated 1	Cytoplasm	enzyme
AIM1_HUMAN	AIM1	absent in melanoma 1	Extracellular Space	other
AIMP1_HUMAN	AIMP1	aminoacyl tRNA synthetase complex-interacting multifunctional protein 1	Extracellular Space	cytokine
AIMP2_HUMAN	AIMP2	aminoacyl tRNA synthetase complex-interacting multifunctional protein 2	Plasma Membrane	other
AIP_HUMAN	AIP	aryl hydrocarbon receptor interacting protein	Nucleus	transcription regulator
KAD6_HUMAN	AK6	adenylate kinase 6	Nucleus	kinase
AKP13_HUMAN	AKAP13	A-kinase anchoring protein 13	Cytoplasm	other
AKAP8_HUMAN	AKAP8	A-kinase anchoring protein 8	Nucleus	other
AKP8L_HUMAN	AKAP8L	A-kinase anchoring protein 8 like	Nucleus	other
AKAP9_HUMAN	AKAP9	A-kinase anchoring protein 9	Cytoplasm	other
ARK72_HUMAN	AKR7A2	aldo-keto reductase family 7, member A2	Cytoplasm	enzyme
ALBU_HUMAN	ALB	albumin	Extracellular Space	transporter	aldoxorubicin
A16A1_HUMAN	ALDH16A1	aldehyde dehydrogenase 16 family member A1	Cytoplasm	enzyme
P5CS_HUMAN	ALDH18A1	aldehyde dehydrogenase 18 family member A1	Cytoplasm	kinase
AL1B1_HUMAN	ALDH1B1	aldehyde dehydrogenase 1 family member B1	Cytoplasm	enzyme
AL9A1_HUMAN	ALDH9A1	aldehyde dehydrogenase 9 family member A1	Cytoplasm	enzyme
LOX5_HUMAN	ALOX5	arachidonate 5-lipoxygenase	Cytoplasm	enzyme	TA 270, benoxaprofen, diclofenac/omeprazole, diclofenac/misoprostol, diclofenac, diethylcarbamazine, meclofenamic acid, zileuton, sulfasalazine, balsalazide, mesalamine, masoprocol
THOC4_HUMAN	ALYREF	Aly/REF export factor	Nucleus	transcription regulator
AMPD2_HUMAN	AMPD2	adenosine monophosphate deaminase 2	Cytoplasm	enzyme
APC1_HUMAN	ANAPC1	anaphase promoting complex subunit 1	Nucleus	other
APC7_HUMAN	ANAPC7	anaphase promoting complex subunit 7	Nucleus	other
ANFY1_HUMAN	ANKFY1	ankyrin repeat and FYVE domain containing 1	Cytoplasm	transcription regulator
ANKH1_HUMAN	ANKHD1/ANKHD1-EIF4EBP3	ankyrin repeat and KH domain containing 1	Other	other
AN13A_HUMAN	ANKRD13A	ankyrin repeat domain 13A	Plasma Membrane	other
ANR17_HUMAN	ANKRD17	ankyrin repeat domain 17	Nucleus	other
ANR27_HUMAN	ANKRD27	ankyrin repeat domain 27	Cytoplasm	other
ANR28_HUMAN	ANKRD28	ankyrin repeat domain 28	Cytoplasm	other
ANR44_HUMAN	ANKRD44	ankyrin repeat domain 44	Other	other
ANR52_HUMAN	ANKRD52	ankyrin repeat domain 52	Nucleus	transcription regulator
ANO6_HUMAN	ANO6	anoctamin 6	Plasma Membrane	ion channel
AN32A_HUMAN	ANP32A	acidic nuclear phosphoprotein 32 family member A	Other	other
AN32B_HUMAN	ANP32B	acidic nuclear phosphoprotein 32 family member B	Nucleus	other
AN32E_HUMAN	ANP32E	acidic nuclear phosphoprotein 32 family member E	Nucleus	other
ANX11_HUMAN	ANXA11	annexin A11	Nucleus	other
ANXA7_HUMAN	ANXA7	annexin A7	Plasma Membrane	ion channel
AP2B1_HUMAN	AP2B1	adaptor related protein complex 2 beta 1 subunit	Plasma Membrane	transporter
AP5Z1_HUMAN	AP5Z1	adaptor related protein complex 5, zeta 1 subunit	Nucleus	other
ACPH_HUMAN	APEH	acylaminoacyl-peptide hydrolase	Cytoplasm	peptidase
MTNB_HUMAN	APIP	APAF1 interacting protein	Cytoplasm	enzyme
APOB_HUMAN	APOB	apolipoprotein B	Extracellular Space	transporter	mipomersen
APOL2_HUMAN	APOL2	apolipoprotein L2	Cytoplasm	other
APT_HUMAN	APRT	adenine phosphoribosyltransferase	Cytoplasm	enzyme
AQR_HUMAN	AQR	aquarius intron-binding spliceosomal factor	Nucleus	other
ARAF_HUMAN	ARAF	A-Raf proto-oncogene, serine/threonine kinase	Cytoplasm	kinase	vemurafenib, MLN2480, cobimetinib/vemurafenib
COPD_HUMAN	ARCN1	archain 1	Cytoplasm	other
ARF1_HUMAN	ARF1	ADP ribosylation factor 1	Cytoplasm	enzyme
ARFG1_HUMAN	ARFGAP1	ADP ribosylation factor GTPase activating protein 1	Cytoplasm	transporter
BIG1_HUMAN	ARFGEF1	ADP ribosylation factor guanine nucleotide exchange factor 1	Cytoplasm	other
BIG2_HUMAN	ARFGEF2	ADP ribosylation factor guanine nucleotide exchange factor 2	Cytoplasm	other
ARFP2_HUMAN	ARFIP2	ADP ribosylation factor interacting protein 2	Cytoplasm	other
RHG01_HUMAN	ARHGAP1	Rho GTPase activating protein 1	Cytoplasm	other
RHG27_HUMAN	ARHGAP27	Rho GTPase activating protein 27	Cytoplasm	other
RHG04_HUMAN	ARHGAP4	Rho GTPase activating protein 4	Cytoplasm	other
ARHG1_HUMAN	ARHGEF1	Rho guanine nucleotide exchange factor 1	Cytoplasm	other
ARHGI_HUMAN	ARHGEF18	Rho/Rac guanine nucleotide exchange factor 18	Cytoplasm	other
ARHG2_HUMAN	ARHGEF2	Rho/Rac guanine nucleotide exchange factor 2	Cytoplasm	other
ARI1A_HUMAN	ARID1A	AT-rich interaction domain 1A	Nucleus	transcription regulator
ARI3B_HUMAN	ARID3B	AT-rich interaction domain 3B	Nucleus	transcription regulator
ARI1_HUMAN	ARIH1	ariadne RBR E3 ubiquitin protein ligase 1	Cytoplasm	enzyme
ARL1_HUMAN	ARL1	ADP ribosylation factor like GTPase 1	Cytoplasm	enzyme
ARL2_HUMAN	ARL2	ADP ribosylation factor like GTPase 2	Cytoplasm	enzyme
ARMC6_HUMAN	ARMC6	armadillo repeat containing 6	Other	other
ARC1B_HUMAN	ARPC1B	actin related protein 2/3 complex subunit 1B	Cytoplasm	other
ARPC2_HUMAN	ARPC2	actin related protein 2/3 complex subunit 2	Cytoplasm	other
ARPC3_HUMAN	ARPC3	actin related protein 2/3 complex subunit 3	Cytoplasm	other
ARPC4_HUMAN	ARPC4	actin related protein 2/3 complex subunit 4	Cytoplasm	other
ARPC5_HUMAN	ARPC5	actin related protein 2/3 complex subunit 5	Cytoplasm	other
ARP5L_HUMAN	ARPC5L	actin related protein 2/3 complex subunit 5-like	Cytoplasm	other
ASAH1_HUMAN	ASAH1	N-acylsphingosine amidohydrolase (acid ceramidase) 1	Cytoplasm	enzyme
ASAS1_HUMAN	ASB16-AS1	ASB16 antisense RNA 1	Other	other
ASCC3_HUMAN	ASCC3	activating signal cointegrator 1 complex subunit 3	Cytoplasm	enzyme
ASF1A_HUMAN	ASF1A	anti-silencing function 1A histone chaperone	Nucleus	other
ASF1B_HUMAN	ASF1B	anti-silencing function 1B histone chaperone	Nucleus	other
ASIC4_HUMAN	ASIC4	acid sensing ion channel subunit family member 4	Plasma Membrane	ion channel	amiloride, amiloride/hydrochlorothiazide
ARLY_HUMAN	ASL	argininosuccinate lyase	Cytoplasm	enzyme
ASML_HUMAN	ASMTL	acetylserotonin O-methyltransferase-like	Cytoplasm	enzyme
ASNA_HUMAN	ASNA1	arsA arsenite transporter, ATP-binding, homolog 1 (bacterial)	Nucleus	transporter
ASNS_HUMAN	ASNS	asparagine synthetase (glutamine-hydrolyzing)	Cytoplasm	enzyme
ASPC1_HUMAN	ASPSCR1	alveolar soft part sarcoma chromosome region, candidate 1	Cytoplasm	other
ATG5_HUMAN	ATG5	autophagy related 5	Cytoplasm	other
ATG7_HUMAN	ATG7	autophagy related 7	Cytoplasm	enzyme
ATM_HUMAN	ATM	ATM serine/threonine kinase	Nucleus	kinase
AT1A1_HUMAN	ATP1A1	ATPase, Na+/K+ transporting, alpha 1 polypeptide	Plasma Membrane	transporter	digoxin, acetyldigitoxin derivative, trichloromethiazide, ciclopirox olamine, ethacrynic acid, reserpine/trichloromethiazide, bretylium, perphenazine, ouabain, digitoxin
AT2B3_HUMAN	ATP2B3	ATPase, Ca++ transporting, plasma membrane 3	Plasma Membrane	transporter
ATPA_HUMAN	ATP5A1	ATP synthase, H+ transporting, mitochondrial F1 complex, alpha subunit 1, cardiac muscle	Cytoplasm	transporter
ATPB_HUMAN	ATP5B	ATP synthase, H+ transporting, mitochondrial F1 complex, beta polypeptide	Cytoplasm	transporter
ATP5S_HUMAN	ATP5S	ATP synthase, H+ transporting, mitochondrial Fo complex subunit s (factor B)	Cytoplasm	transporter
VPP4_HUMAN	ATP6V0A4	ATPase, H+ transporting, lysosomal V0 subunit a4	Cytoplasm	transporter
VATA_HUMAN	ATP6V1A	ATPase, H+ transporting, lysosomal 70kDa, V1 subunit A	Plasma Membrane	transporter	bafilomycin A1, bafilomycin b1
VATB2_HUMAN	ATP6V1B2	ATPase, H+ transporting, lysosomal 56/58kDa, V1 subunit B2	Cytoplasm	transporter	gallium nitrate
VATC1_HUMAN	ATP6V1C1	ATPase, H+ transporting, lysosomal 42kDa, V1 subunit C1	Cytoplasm	transporter
VATD_HUMAN	ATP6V1D	ATPase, H+ transporting, lysosomal 34kDa, V1 subunit D	Cytoplasm	transporter
VATE1_HUMAN	ATP6V1E1	ATPase, H+ transporting, lysosomal 31kDa, V1 subunit E1	Cytoplasm	transporter
ATR_HUMAN	ATR	ATR serine/threonine kinase	Nucleus	kinase	AZD6738, VX-970
ATX10_HUMAN	ATXN10	ataxin 10	Cytoplasm	other
ATX2L_HUMAN	ATXN2L	ataxin 2-like	Nucleus	other
AURKB_HUMAN	AURKB	aurora kinase B	Nucleus	kinase	barasertib, tozasertib, AT-9283, danusertib, GSK1070916, TTP607, AMG 900, ilorasertib, chiauranib
BABA1_HUMAN	BABAM1	BRISC and BRCA1 A complex member 1	Nucleus	other
BACH2_HUMAN	BACH2	BTB and CNC homology 1, basic leucine zipper transcription factor 2	Nucleus	transcription regulator
BAG6_HUMAN	BAG6	BCL2 associated athanogene 6	Nucleus	enzyme
BAX_HUMAN	BAX	BCL2-associated X protein	Cytoplasm	transporter
SPF27_HUMAN	BCAS2	breast carcinoma amplified sequence 2	Nucleus	other
ODBA_HUMAN	BCKDHA	branched chain keto acid dehydrogenase E1, alpha polypeptide	Cytoplasm	enzyme
BCR_HUMAN	BCR	breakpoint cluster region	Cytoplasm	kinase
BECN1_HUMAN	BECN1	beclin 1, autophagy related	Cytoplasm	other
BHE40_HUMAN	BHLHE40	basic helix-loop-helix family member e40	Nucleus	transcription regulator
BICD1_HUMAN	BICD1	bicaudal D homolog 1 (Drosophila)	Cytoplasm	other
BICD2_HUMAN	BICD2	bicaudal D homolog 2 (Drosophila)	Cytoplasm	other
BIN3_HUMAN	BIN3	bridging integrator 3	Cytoplasm	other
BLK_HUMAN	BLK	BLK proto-oncogene, Src family tyrosine kinase	Cytoplasm	kinase	osimertinib
BLM_HUMAN	BLM	Bloom syndrome, RecQ helicase-like	Nucleus	enzyme
BL1S2_HUMAN	BLOC1S2	biogenesis of lysosomal organelles complex 1 subunit 2	Cytoplasm	other
L12R1_HUMAN	BORCS5	BLOC-1 related complex subunit 5	Other	other
BRAT1_HUMAN	BRAT1	BRCA1-associated ATM activator 1	Nucleus	other
BRCC3_HUMAN	BRCC3	BRCA1/BRCA2-containing complex subunit 3	Nucleus	enzyme
BRD4_HUMAN	BRD4	bromodomain containing 4	Nucleus	kinase
BRE_HUMAN	BRE	brain and reproductive organ-expressed (TNFRSF1A modulator)	Cytoplasm	other
BSDC1_HUMAN	BSDC1	BSD domain containing 1	Other	other
BTAF1_HUMAN	BTAF1	B-TFIID TATA-box binding protein associated factor 1	Nucleus	transcription regulator
BTK_HUMAN	BTK	Bruton tyrosine kinase	Cytoplasm	kinase	ibrutinib, bendamustine/ibrutinib/rituximab, CC-292, ONO-4059, ACP-196, BGB-3111, ACP-196/ACP-319, GDC-0853
BUB3_HUMAN	BUB3	BUB3 mitotic checkpoint protein	Nucleus	other
BYST_HUMAN	BYSL	bystin like	Nucleus	other
BZW1_HUMAN	BZW1	basic leucine zipper and W2 domains 1	Cytoplasm	translation regulator
CJ076_HUMAN	C10orf76	chromosome 10 open reading frame 76	Other	other
SELH_HUMAN	C11orf31	chromosome 11 open reading frame 31	Nucleus	other
HIKES_HUMAN	C11orf73	chromosome 11 open reading frame 73	Cytoplasm	transporter
CL045_HUMAN	C12orf45	chromosome 12 open reading frame 45	Other	other
CN166_HUMAN	C14orf166	chromosome 14 open reading frame 166	Nucleus	other
BAP18_HUMAN	C17orf49	chromosome 17 open reading frame 49	Nucleus	other
CA050_HUMAN	C1orf50	chromosome 1 open reading frame 50	Other	other
C1QBP_HUMAN	C1QBP	complement component 1, q subcomponent binding protein	Cytoplasm	transcription regulator
ES1_HUMAN	C21orf33/LOC102724023	chromosome 21 open reading frame 33	Cytoplasm	other
CU062_HUMAN	C21orf62	chromosome 21 open reading frame 62	Other	other
C2C4C_HUMAN	C2CD4C	C2 calcium-dependent domain containing 4C	Extracellular Space	other
CE051_HUMAN	C5orf51	chromosome 5 open reading frame 51	Other	other
CI040_HUMAN	C9orf40	chromosome 9 open reading frame 40	Other	other
CYBP_HUMAN	CACYBP	calcyclin binding protein	Nucleus	other
PYR1_HUMAN	CAD	carbamoyl-phosphate synthetase 2, aspartate transcarbamylase, and dihydroorotase	Cytoplasm	enzyme
CALL5_HUMAN	CALML5	calmodulin like 5	Cytoplasm	other
CALR_HUMAN	CALR	calreticulin	Cytoplasm	transcription regulator
CALU_HUMAN	CALU	calumenin	Cytoplasm	other
KCC2D_HUMAN	CAMK2D	calcium/calmodulin-dependent protein kinase II delta	Cytoplasm	kinase
KCC2G_HUMAN	CAMK2G	calcium/calmodulin-dependent protein kinase II gamma	Cytoplasm	kinase
CAND1_HUMAN	CAND1	cullin-associated and neddylation-dissociated 1	Cytoplasm	transcription regulator
CALX_HUMAN	CANX	calnexin	Cytoplasm	other
CAP1_HUMAN	CAP1	CAP, adenylate cyclase-associated protein 1 (yeast)	Plasma Membrane	other
CAN11_HUMAN	CAPN11	calpain 11	Cytoplasm	peptidase
CPNS1_HUMAN	CAPNS1	calpain, small subunit 1	Cytoplasm	peptidase
CAPR1_HUMAN	CAPRIN1	cell cycle associated protein 1	Plasma Membrane	other
CAZA1_HUMAN	CAPZA1	capping protein (actin filament) muscle Z-line, alpha 1	Cytoplasm	other
CAR11_HUMAN	CARD11	caspase recruitment domain family member 11	Cytoplasm	kinase
CARM1_HUMAN	CARM1	coactivator associated arginine methyltransferase 1	Nucleus	transcription regulator
SYCC_HUMAN	CARS	cysteinyl-tRNA synthetase	Cytoplasm	enzyme
CASPC_HUMAN	CASP12	caspase 12 (gene/pseudogene)	Cytoplasm	peptidase
CASP5_HUMAN	CASP5	caspase 5	Cytoplasm	peptidase
CATA_HUMAN	CAT	catalase	Cytoplasm	enzyme	fomepizole
CBWD1_HUMAN	CBWD1	COBW domain containing 1	Other	other
CBX3_HUMAN	CBX3	chromobox 3	Nucleus	transcription regulator
CC117_HUMAN	CCDC117	coiled-coil domain containing 117	Other	other
CC124_HUMAN	CCDC124	coiled-coil domain containing 124	Other	other
CCDC6_HUMAN	CCDC6	coiled-coil domain containing 6	Cytoplasm	other
CC88B_HUMAN	CCDC88B	coiled-coil domain containing 88B	Nucleus	enzyme
DAPLE_HUMAN	CCDC88C	coiled-coil domain containing 88C	Cytoplasm	other
CCD97_HUMAN	CCDC97	coiled-coil domain containing 97	Other	other
CCND3_HUMAN	CCND3	cyclin D3	Nucleus	other
TCPB_HUMAN	CCT2	chaperonin containing TCP1 subunit 2	Cytoplasm	kinase
TCPG_HUMAN	CCT3	chaperonin containing TCP1 subunit 3	Cytoplasm	other
TCPD_HUMAN	CCT4	chaperonin containing TCP1 subunit 4	Cytoplasm	other
TCPE_HUMAN	CCT5	chaperonin containing TCP1 subunit 5	Cytoplasm	other
TCPZ_HUMAN	CCT6A	chaperonin containing TCP1 subunit 6A	Cytoplasm	other
TCPW_HUMAN	CCT6B	chaperonin containing TCP1 subunit 6B	Cytoplasm	transporter
TCPH_HUMAN	CCT7	chaperonin containing TCP1 subunit 7	Cytoplasm	other
TCPQ_HUMAN	CCT8	chaperonin containing TCP1 subunit 8	Cytoplasm	enzyme
CD19_HUMAN	CD19	CD19 molecule	Plasma Membrane	transmembrane receptor	combotox, HD37-dgRTA, blinatumomab, MEDI-551, SGN-CD19A
CD22_HUMAN	CD22	CD22 molecule	Plasma Membrane	transmembrane receptor	epratuzumab, BL22 immunotoxin, inotuzumab ozogamicin, combotox, RFB4-dgRTA, immunotoxin HA22
CD2B2_HUMAN	CD2BP2	CD2 (cytoplasmic tail) binding protein 2	Cytoplasm	other
CD38_HUMAN	CD38	CD38 molecule	Plasma Membrane	enzyme	daratumumab
CD53_HUMAN	CD53	CD53 molecule	Plasma Membrane	other
CD79B_HUMAN	CD79B	CD79b molecule	Plasma Membrane	transmembrane receptor
CD81_HUMAN	CD81	CD81 molecule	Plasma Membrane	other
UB2R1_HUMAN	CDC34	cell division cycle 34	Nucleus	enzyme
CDC37_HUMAN	CDC37	cell division cycle 37	Cytoplasm	other
CD37L_HUMAN	CDC37L1	cell division cycle 37-like 1	Cytoplasm	other
CDC42_HUMAN	CDC42	cell division cycle 42	Cytoplasm	enzyme
CDC73_HUMAN	CDC73	cell division cycle 73	Nucleus	other
CDCA2_HUMAN	CDCA2	cell division cycle associated 2	Nucleus	other
CDK1_HUMAN	CDK1	cyclin-dependent kinase 1	Nucleus	kinase	dinaciclib, milciclib, SB-1317, roniciclib, alvocidib
CDK12_HUMAN	CDK12	cyclin-dependent kinase 12	Nucleus	kinase
CDK4_HUMAN	CDK4	cyclin-dependent kinase 4	Nucleus	kinase	palbociclib, cyclin dependent kinase 4 inhibitor, milciclib, ribociclib, abemaciclib, letrozole/palbociclib, roniciclib, FLX925, fulvestrant/palbociclib, alvocidib
CK5P3_HUMAN	CDK5RAP3	CDK5 regulatory subunit associated protein 3	Nucleus	other
CDK6_HUMAN	CDK6	cyclin-dependent kinase 6	Nucleus	kinase	palbociclib, ribociclib, abemaciclib, letrozole/palbociclib, FLX925, fulvestrant/palbociclib, alvocidib
CDK9_HUMAN	CDK9	cyclin-dependent kinase 9	Nucleus	kinase	roscovitine, BMS-387032, dinaciclib, SB-1317, roniciclib, alvocidib
CARF_HUMAN	CDKN2AIP	CDKN2A interacting protein	Nucleus	transcription regulator
CELF1_HUMAN	CELF1	CUGBP, Elav-like family member 1	Cytoplasm	translation regulator
CENPH_HUMAN	CENPH	centromere protein H	Nucleus	other
CP135_HUMAN	CEP135	centrosomal protein 135kDa	Cytoplasm	other
CEP85_HUMAN	CEP85	centrosomal protein 85kDa	Nucleus	other
CETN3_HUMAN	CETN3	centrin 3	Cytoplasm	other
CING_HUMAN	CGN	cingulin	Plasma Membrane	other
CHD4_HUMAN	CHD4	chromodomain helicase DNA binding protein 4	Nucleus	enzyme
CHERP_HUMAN	CHERP	calcium homeostasis endoplasmic reticulum protein	Cytoplasm	other
CHM2A_HUMAN	CHMP2A	charged multivesicular body protein 2A	Cytoplasm	other
CTF18_HUMAN	CHTF18	chromosome transmission fidelity factor 18	Nucleus	other
CIAO1_HUMAN	CIAO1	cytosolic iron-sulfur assembly component 1	Nucleus	transcription regulator
CILP2_HUMAN	CILP2	cartilage intermediate layer protein 2	Extracellular Space	other
CIRBP_HUMAN	CIRBP	cold inducible RNA binding protein	Nucleus	translation regulator
CKAP5_HUMAN	CKAP5	cytoskeleton associated protein 5	Nucleus	transcription regulator
CLIC1_HUMAN	CLIC1	chloride intracellular channel 1	Nucleus	ion channel
CLIC4_HUMAN	CLIC4	chloride intracellular channel 4	Plasma Membrane	ion channel
EPN4_HUMAN	CLINT1	clathrin interactor 1	Cytoplasm	other
ICLN_HUMAN	CLNS1A	chloride channel, nucleotide-sensitive, 1A	Plasma Membrane	ion channel
CLH1_HUMAN	CLTC	clathrin, heavy chain (Hc)	Plasma Membrane	other
CLU_HUMAN	CLUH	clustered mitochondria (cluA/CLU1) homolog	Cytoplasm	translation regulator
CNDP2_HUMAN	CNDP2	CNDP dipeptidase 2 (metallopeptidase M20 family)	Cytoplasm	peptidase
CNN2_HUMAN	CNN2	calponin 2	Cytoplasm	other
CNOT1_HUMAN	CNOT1	CCR4-NOT transcription complex subunit 1	Cytoplasm	other
CNOT2_HUMAN	CNOT2	CCR4-NOT transcription complex subunit 2	Nucleus	transcription regulator
CNOT3_HUMAN	CNOT3	CCR4-NOT transcription complex subunit 3	Cytoplasm	other
CNOT7_HUMAN	CNOT7	CCR4-NOT transcription complex subunit 7	Nucleus	transcription regulator
COBA2_HUMAN	COL11A2	collagen, type XI, alpha 2	Extracellular Space	other	collagenase clostridium histolyticum
CO3A1_HUMAN	COL3A1	collagen, type III, alpha 1	Extracellular Space	other	collagenase clostridium histolyticum
COMD1_HUMAN	COMMD1	copper metabolism domain containing 1	Nucleus	transporter
COMD3_HUMAN	COMMD3	COMM domain containing 3	Other	other
COMD7_HUMAN	COMMD7	COMM domain containing 7	Cytoplasm	other
COMD8_HUMAN	COMMD8	COMM domain containing 8	Other	other
COMD9_HUMAN	COMMD9	COMM domain containing 9	Other	other
COPA_HUMAN	COPA	coatomer protein complex subunit alpha	Cytoplasm	transporter
COPB_HUMAN	COPB1	coatomer protein complex subunit beta 1	Cytoplasm	transporter
COPB2_HUMAN	COPB2	coatomer protein complex subunit beta 2 (beta prime)	Cytoplasm	transporter
COPE_HUMAN	COPE	coatomer protein complex subunit epsilon	Cytoplasm	transporter
COPG1_HUMAN	COPG1	coatomer protein complex subunit gamma 1	Cytoplasm	transporter
COPG2_HUMAN	COPG2	coatomer protein complex subunit gamma 2	Cytoplasm	transporter
CSN2_HUMAN	COPS2	COP9 signalosome subunit 2	Cytoplasm	other
CSN3_HUMAN	COPS3	COP9 signalosome subunit 3	Cytoplasm	other
CSN4_HUMAN	COPS4	COP9 signalosome subunit 4	Cytoplasm	other
CSN5_HUMAN	COPS5	COP9 signalosome subunit 5	Nucleus	transcription regulator
CSN6_HUMAN	COPS6	COP9 signalosome subunit 6	Nucleus	other
CSN7A_HUMAN	COPS7A	COP9 signalosome subunit 7A	Cytoplasm	other
CSN7B_HUMAN	COPS7B	COP9 signalosome subunit 7B	Cytoplasm	other
CSN8_HUMAN	COPS8	COP9 signalosome subunit 8	Nucleus	other
COPZ1_HUMAN	COPZ1	coatomer protein complex subunit zeta 1	Cytoplasm	transporter
COR1A_HUMAN	CORO1A	coronin 1A	Cytoplasm	other
CORO7_HUMAN	CORO7/CORO7-PAM16	coronin 7	Cytoplasm	other
CPNE1_HUMAN	CPNE1	copine I	Nucleus	transporter
CPNE2_HUMAN	CPNE2	copine II	Cytoplasm	other
CPSF1_HUMAN	CPSF1	cleavage and polyadenylation specific factor 1	Nucleus	other
CPSF3_HUMAN	CPSF3	cleavage and polyadenylation specific factor 3	Nucleus	enzyme
CPSF6_HUMAN	CPSF6	cleavage and polyadenylation specific factor 6	Nucleus	other
CREG1_HUMAN	CREG1	cellular repressor of E1A stimulated genes 1	Nucleus	transcription regulator
CRKL_HUMAN	CRKL	v-crk avian sarcoma virus CT10 oncogene homolog-like	Cytoplasm	kinase
CRLF3_HUMAN	CRLF3	cytokine receptor-like factor 3	Cytoplasm	transcription regulator
QOR_HUMAN	CRYZ	crystallin zeta	Cytoplasm	enzyme
CSDE1_HUMAN	CSDE1	cold shock domain containing E1, RNA binding	Cytoplasm	enzyme
XPO2_HUMAN	CSE1L	CSE1 chromosome segregation 1-like (yeast)	Nucleus	transporter
CSK_HUMAN	CSK	c-src tyrosine kinase	Cytoplasm	kinase	bosutinib
CSK21_HUMAN	CSNK2A1	casein kinase 2, alpha 1 polypeptide	Nucleus	kinase
CSK22_HUMAN	CSNK2A2	casein kinase 2, alpha prime polypeptide	Cytoplasm	kinase
CSK2B_HUMAN	CSNK2B	casein kinase 2, beta polypeptide	Cytoplasm	kinase
CSPP1_HUMAN	CSPP1	centrosome and spindle pole associated protein 1	Cytoplasm	other
CYTA_HUMAN	CSTA	cystatin A	Cytoplasm	other
CYTB_HUMAN	CSTB	cystatin B	Cytoplasm	peptidase
CSTF1_HUMAN	CSTF1	cleavage stimulation factor, 3' pre-RNA, subunit 1	Nucleus	other
CTBP1_HUMAN	CTBP1	C-terminal binding protein 1	Nucleus	enzyme
CTDP1_HUMAN	CTDP1	CTD phosphatase subunit 1	Nucleus	phosphatase
PYRG1_HUMAN	CTPS1	CTP synthase 1	Nucleus	enzyme	cytidine triphosphate synthetase inhibitor
CATC_HUMAN	CTSC	cathepsin C	Cytoplasm	peptidase
CATS_HUMAN	CTSS	cathepsin S	Cytoplasm	peptidase
CATZ_HUMAN	CTSZ	cathepsin Z	Cytoplasm	peptidase
SRC8_HUMAN	CTTN	cortactin	Plasma Membrane	other
CTU1_HUMAN	CTU1	cytosolic thiouridylase subunit 1	Cytoplasm	other
CUL2_HUMAN	CUL2	cullin 2	Nucleus	enzyme
CUL3_HUMAN	CUL3	cullin 3	Nucleus	enzyme
CUL4A_HUMAN	CUL4A	cullin 4A	Nucleus	other
CUL4B_HUMAN	CUL4B	cullin 4B	Nucleus	other
CUTA_HUMAN	CUTA	cutA divalent cation tolerance homolog (E. coli)	Cytoplasm	other
CUTC_HUMAN	CUTC	cutC copper transporter	Cytoplasm	other
CXCR4_HUMAN	CXCR4	chemokine (C-X-C motif) receptor 4	Plasma Membrane	G-protein coupled receptor	cladribine/cytarabine/filgrastim/idarubicin/plerixafor, POL6326, BL-8040, plerixafor
CYFP1_HUMAN	CYFIP1	cytoplasmic FMR1 interacting protein 1	Cytoplasm	other
CYFP2_HUMAN	CYFIP2	cytoplasmic FMR1 interacting protein 2	Cytoplasm	other
SYDC_HUMAN	DARS	aspartyl-tRNA synthetase	Cytoplasm	enzyme
DAZP1_HUMAN	DAZAP1	DAZ associated protein 1	Other	other
DBNL_HUMAN	DBNL	drebrin-like	Cytoplasm	other
DCA11_HUMAN	DCAF11	DDB1 and CUL4 associated factor 11	Nucleus	other
DCA16_HUMAN	DCAF16	DDB1 and CUL4 associated factor 16	Other	other
DCAF7_HUMAN	DCAF7	DDB1 and CUL4 associated factor 7	Cytoplasm	other
DCD_HUMAN	DCD	dermcidin	Extracellular Space	other
DCK_HUMAN	DCK	deoxycytidine kinase	Nucleus	kinase	cytarabine/fludarabine phosphate, cladribine/cytarabine/daunorubicin, cladribine/cytarabine/filgrastim, cytarabine/filgrastim/fludarabine phosphate, cladribine/cytarabine/filgrastim/mitoxantrone, fludarabine phosphate/rituximab, cladribine/rituximab, cytarabine/filgrastim/fludarabine phosphate/idarubicin, dexamethasone/fludarabine phosphate/mitoxantrone, alemtuzumab/fludarabine phosphate, fludara…
DCP1A_HUMAN	DCP1A	decapping mRNA 1A	Nucleus	other
DCPS_HUMAN	DCPS	decapping enzyme, scavenger	Nucleus	enzyme
DCTN1_HUMAN	DCTN1	dynactin subunit 1	Cytoplasm	other
DCTN2_HUMAN	DCTN2	dynactin subunit 2	Cytoplasm	other
DCTP1_HUMAN	DCTPP1	dCTP pyrophosphatase 1	Cytoplasm	enzyme
DCNL1_HUMAN	DCUN1D1	defective in cullin neddylation 1 domain containing 1	Nucleus	other
DCXR_HUMAN	DCXR	dicarbonyl/L-xylulose reductase	Cytoplasm	enzyme
DDB1_HUMAN	DDB1	damage-specific DNA binding protein 1	Nucleus	other
DDHD1_HUMAN	DDHD1	DDHD domain containing 1	Extracellular Space	enzyme
DDI2_HUMAN	DDI2	DNA damage inducible 1 homolog 2	Plasma Membrane	transporter
DDX1_HUMAN	DDX1	DEAD/H-box helicase 1	Nucleus	enzyme
DDX17_HUMAN	DDX17	DEAD-box helicase 17	Nucleus	enzyme
DDX21_HUMAN	DDX21	DEAD-box helicase 21	Nucleus	enzyme
DDX24_HUMAN	DDX24	DEAD-box helicase 24	Nucleus	enzyme
DX39B_HUMAN	DDX39B	DEAD-box helicase 39B	Nucleus	enzyme
DDX3Y_HUMAN	DDX3Y	DEAD-box helicase 3, Y-linked	Cytoplasm	enzyme
DDX42_HUMAN	DDX42	DEAD-box helicase 42	Cytoplasm	enzyme
DDX5_HUMAN	DDX5	DEAD-box helicase 5	Nucleus	enzyme
DDX58_HUMAN	DDX58	DEXD/H-box helicase 58	Cytoplasm	enzyme
DDX6_HUMAN	DDX6	DEAD-box helicase 6	Nucleus	enzyme
DEDD_HUMAN	DEDD	death effector domain containing	Nucleus	other
MYCPP_HUMAN	DENND4A	DENN/MADD domain containing 4A	Nucleus	other
DEOC_HUMAN	DERA	deoxyribose-phosphate aldolase (putative)	Cytoplasm	enzyme
DGKI_HUMAN	DGKI	diacylglycerol kinase iota	Cytoplasm	kinase
DHYS_HUMAN	DHPS	deoxyhypusine synthase	Cytoplasm	enzyme
DHTK1_HUMAN	DHTKD1	dehydrogenase E1 and transketolase domain containing 1	Cytoplasm	enzyme
DHX15_HUMAN	DHX15	DEAH-box helicase 15	Nucleus	enzyme
DHX16_HUMAN	DHX16	DEAH-box helicase 16	Nucleus	enzyme
DHX30_HUMAN	DHX30	DEAH-box helicase 30	Nucleus	enzyme
DHX36_HUMAN	DHX36	DEAH-box helicase 36	Cytoplasm	enzyme
PRP16_HUMAN	DHX38	DEAH-box helicase 38	Nucleus	enzyme
DHX9_HUMAN	DHX9	DEAH-box helicase 9	Nucleus	enzyme
DBLOH_HUMAN	DIABLO	diablo, IAP-binding mitochondrial protein	Cytoplasm	other
DIAP1_HUMAN	DIAPH1	diaphanous related formin 1	Plasma Membrane	other
DICER_HUMAN	DICER1	dicer 1, ribonuclease type III	Cytoplasm	enzyme
DKC1_HUMAN	DKC1	dyskeratosis congenita 1, dyskerin	Nucleus	enzyme
DLDH_HUMAN	DLD	dihydrolipoamide dehydrogenase	Cytoplasm	enzyme	hexachlorophene
DMXL1_HUMAN	DMXL1	Dmx like 1	Extracellular Space	other
DYH12_HUMAN	DNAH12	dynein, axonemal, heavy chain 12	Other	other
DYH6_HUMAN	DNAH6	dynein, axonemal, heavy chain 6	Extracellular Space	other
DNJA1_HUMAN	DNAJA1	DnaJ heat shock protein family (Hsp40) member A1	Nucleus	other
DNJA2_HUMAN	DNAJA2	DnaJ heat shock protein family (Hsp40) member A2	Nucleus	enzyme
DNJA4_HUMAN	DNAJA4	DnaJ heat shock protein family (Hsp40) member A4	Nucleus	other
DJB11_HUMAN	DNAJB11	DnaJ heat shock protein family (Hsp40) member B11	Cytoplasm	other
DNJB2_HUMAN	DNAJB2	DnaJ heat shock protein family (Hsp40) member B2	Nucleus	other
DJC10_HUMAN	DNAJC10	DnaJ heat shock protein family (Hsp40) member C10	Cytoplasm	enzyme
DJC21_HUMAN	DNAJC21	DnaJ heat shock protein family (Hsp40) member C21	Other	other
DNJC7_HUMAN	DNAJC7	DnaJ heat shock protein family (Hsp40) member C7	Cytoplasm	other
DNM1L_HUMAN	DNM1L	dynamin 1-like	Cytoplasm	enzyme
DYN2_HUMAN	DNM2	dynamin 2	Plasma Membrane	enzyme
DNMBP_HUMAN	DNMBP	dynamin binding protein	Cytoplasm	other
DNMT1_HUMAN	DNMT1	DNA (cytosine-5-)-methyltransferase 1	Nucleus	enzyme	5-azacytidine/decitabine, 5-azacytidine/cytarabine/decitabine, 5-azacytidine/sorafenib, decitabine/sorafenib, cladribine/cytarabine/decitabine, 5-azacytidine, decitabine
DOCK2_HUMAN	DOCK2	dedicator of cytokinesis 2	Cytoplasm	other
DOCK8_HUMAN	DOCK8	dedicator of cytokinesis 8	Cytoplasm	other
DPH2_HUMAN	DPH2	DPH2 homolog	Cytoplasm	other
DPH5_HUMAN	DPH5	diphthamide biosynthesis 5	Cytoplasm	enzyme
DPP3_HUMAN	DPP3	dipeptidyl-peptidase 3	Cytoplasm	peptidase
DPP8_HUMAN	DPP8	dipeptidyl-peptidase 8	Cytoplasm	peptidase
DPP9_HUMAN	DPP9	dipeptidyl-peptidase 9	Cytoplasm	peptidase
DPYL2_HUMAN	DPYSL2	dihydropyrimidinase like 2	Cytoplasm	enzyme
DCC1_HUMAN	DSCC1	DNA replication and sister chromatid cohesion 1	Nucleus	other
DUT_HUMAN	DUT	deoxyuridine triphosphatase	Nucleus	enzyme	TAS-114
DYHC1_HUMAN	DYNC1H1	dynein, cytoplasmic 1, heavy chain 1	Cytoplasm	peptidase
DC1I2_HUMAN	DYNC1I2	dynein, cytoplasmic 1, intermediate chain 2	Cytoplasm	other
DC1L1_HUMAN	DYNC1LI1	dynein, cytoplasmic 1, light intermediate chain 1	Cytoplasm	other
DYSF_HUMAN	DYSF	dysferlin	Plasma Membrane	other
DZI1L_HUMAN	DZIP1L	DAZ interacting zinc finger protein 1-like	Extracellular Space	other
SYEM_HUMAN	EARS2	glutamyl-tRNA synthetase 2, mitochondrial	Cytoplasm	enzyme
ECHM_HUMAN	ECHS1	enoyl-CoA hydratase, short chain, 1, mitochondrial	Cytoplasm	enzyme
EDC3_HUMAN	EDC3	enhancer of mRNA decapping 3	Cytoplasm	other
EDC4_HUMAN	EDC4	enhancer of mRNA decapping 4	Cytoplasm	other
EDRF1_HUMAN	EDRF1	erythroid differentiation regulatory factor 1	Other	other
EEA1_HUMAN	EEA1	early endosome antigen 1	Cytoplasm	other
EF1A1_HUMAN	EEF1A1	eukaryotic translation elongation factor 1 alpha 1	Cytoplasm	translation regulator
EF1B_HUMAN	EEF1B2	eukaryotic translation elongation factor 1 beta 2	Cytoplasm	translation regulator
EF1D_HUMAN	EEF1D	eukaryotic translation elongation factor 1 delta (guanine nucleotide exchange protein)	Cytoplasm	translation regulator
MCA3_HUMAN	EEF1E1	eukaryotic translation elongation factor 1 epsilon 1	Cytoplasm	translation regulator
EF1G_HUMAN	EEF1G	eukaryotic translation elongation factor 1 gamma	Cytoplasm	translation regulator
EF2_HUMAN	EEF2	eukaryotic translation elongation factor 2	Cytoplasm	translation regulator
EF2K_HUMAN	EEF2K	eukaryotic elongation factor 2 kinase	Cytoplasm	kinase
ETUD1_HUMAN	EFL1	elongation factor like GTPase 1	Cytoplasm	translation regulator
U5S1_HUMAN	EFTUD2	elongation factor Tu GTP binding domain containing 2	Nucleus	enzyme
EHD1_HUMAN	EHD1	EH domain containing 1	Cytoplasm	other
EI2BA_HUMAN	EIF2B1	eukaryotic translation initiation factor 2B subunit alpha	Cytoplasm	translation regulator
EI2BB_HUMAN	EIF2B2	eukaryotic translation initiation factor 2B subunit beta	Cytoplasm	other
EI2BG_HUMAN	EIF2B3	eukaryotic translation initiation factor 2B subunit gamma	Cytoplasm	other
EI2BD_HUMAN	EIF2B4	eukaryotic translation initiation factor 2B subunit delta	Cytoplasm	other
IF2A_HUMAN	EIF2S1	eukaryotic translation initiation factor 2 subunit alpha	Cytoplasm	translation regulator
IF2G_HUMAN	EIF2S3	eukaryotic translation initiation factor 2 subunit gamma	Cytoplasm	translation regulator
EIF3A_HUMAN	EIF3A	eukaryotic translation initiation factor 3 subunit A	Cytoplasm	other
EIF3B_HUMAN	EIF3B	eukaryotic translation initiation factor 3 subunit B	Cytoplasm	translation regulator
EIF3C_HUMAN	EIF3C	eukaryotic translation initiation factor 3 subunit C	Other	translation regulator
EIF3D_HUMAN	EIF3D	eukaryotic translation initiation factor 3 subunit D	Cytoplasm	other
EIF3E_HUMAN	EIF3E	eukaryotic translation initiation factor 3 subunit E	Cytoplasm	other
EIF3F_HUMAN	EIF3F	eukaryotic translation initiation factor 3 subunit F	Cytoplasm	translation regulator
EIF3G_HUMAN	EIF3G	eukaryotic translation initiation factor 3 subunit G	Cytoplasm	other
EIF3I_HUMAN	EIF3I	eukaryotic translation initiation factor 3 subunit I	Cytoplasm	translation regulator
EIF3J_HUMAN	EIF3J	eukaryotic translation initiation factor 3 subunit J	Cytoplasm	translation regulator
EIF3K_HUMAN	EIF3K	eukaryotic translation initiation factor 3 subunit K	Cytoplasm	translation regulator
EIF3L_HUMAN	EIF3L	eukaryotic translation initiation factor 3 subunit L	Cytoplasm	other
EIF3M_HUMAN	EIF3M	eukaryotic translation initiation factor 3 subunit M	Cytoplasm	other
IF4A1_HUMAN	EIF4A1	eukaryotic translation initiation factor 4A1	Cytoplasm	translation regulator
IF4A2_HUMAN	EIF4A2	eukaryotic translation initiation factor 4A2	Cytoplasm	translation regulator
IF4A3_HUMAN	EIF4A3	eukaryotic translation initiation factor 4A3	Nucleus	enzyme
IF4B_HUMAN	EIF4B	eukaryotic translation initiation factor 4B	Cytoplasm	translation regulator
IF4E_HUMAN	EIF4E	eukaryotic translation initiation factor 4E	Cytoplasm	translation regulator
IF4E2_HUMAN	EIF4E2	eukaryotic translation initiation factor 4E family member 2	Cytoplasm	translation regulator
IF4G1_HUMAN	EIF4G1	eukaryotic translation initiation factor 4 gamma, 1	Cytoplasm	translation regulator
IF5A1_HUMAN	EIF5A	eukaryotic translation initiation factor 5A	Cytoplasm	translation regulator
IF2P_HUMAN	EIF5B	eukaryotic translation initiation factor 5B	Cytoplasm	translation regulator
IF6_HUMAN	EIF6	eukaryotic translation initiation factor 6	Cytoplasm	translation regulator
RNZ2_HUMAN	ELAC2	elaC ribonuclease Z 2	Nucleus	enzyme
ELAV1_HUMAN	ELAVL1	ELAV like RNA binding protein 1	Cytoplasm	other
ELMO1_HUMAN	ELMO1	engulfment and cell motility 1	Cytoplasm	other
ELP2_HUMAN	ELP2	elongator acetyltransferase complex subunit 2	Cytoplasm	other
ELP3_HUMAN	ELP3	elongator acetyltransferase complex subunit 3	Nucleus	enzyme
ENASE_HUMAN	ENGASE	endo-beta-N-acetylglucosaminidase	Other	enzyme
EPHB4_HUMAN	EPHB4	EPH receptor B4	Plasma Membrane	kinase	tesevatinib
EP2A2_HUMAN	EPM2A	epilepsy, progressive myoclonus type 2A, Lafora disease (laforin)	Cytoplasm	phosphatase
SYEP_HUMAN	EPRS	glutamyl-prolyl-tRNA synthetase	Cytoplasm	enzyme
EPS15_HUMAN	EPS15	epidermal growth factor receptor pathway substrate 15	Cytoplasm	other
EP15R_HUMAN	EPS15L1	epidermal growth factor receptor pathway substrate 15-like 1	Plasma Membrane	other
ERAP1_HUMAN	ERAP1	endoplasmic reticulum aminopeptidase 1	Extracellular Space	peptidase
RB6I2_HUMAN	ERC1	ELKS/RAB6-interacting/CAST family member 1	Cytoplasm	other
ERIC1_HUMAN	ERICH1	glutamate rich 1	Other	other
ERO1A_HUMAN	ERO1A	endoplasmic reticulum oxidoreductase alpha	Cytoplasm	enzyme
ERP29_HUMAN	ERP29	endoplasmic reticulum protein 29	Cytoplasm	transporter
ERP44_HUMAN	ERP44	endoplasmic reticulum protein 44	Cytoplasm	enzyme
ESF1_HUMAN	ESF1	ESF1 nucleolar pre-rRNA processing protein homolog	Nucleus	other
ESYT1_HUMAN	ESYT1	extended synaptotagmin-like protein 1	Cytoplasm	other
ERF1_HUMAN	ETF1	eukaryotic translation termination factor 1	Cytoplasm	translation regulator
ETS1_HUMAN	ETS1	v-ets avian erythroblastosis virus E26 oncogene homolog 1	Nucleus	transcription regulator
EWS_HUMAN	EWSR1	EWS RNA binding protein 1	Nucleus	other
EXOC1_HUMAN	EXOC1	exocyst complex component 1	Cytoplasm	transporter
EXOC4_HUMAN	EXOC4	exocyst complex component 4	Cytoplasm	transporter
EXOS4_HUMAN	EXOSC4	exosome component 4	Nucleus	enzyme
EXOS5_HUMAN	EXOSC5	exosome component 5	Nucleus	enzyme
EXOS8_HUMAN	EXOSC8	exosome component 8	Nucleus	enzyme
FAF1_HUMAN	FAF1	Fas (TNFRSF6) associated factor 1	Nucleus	other
F117B_HUMAN	FAM117B	family with sequence similarity 117 member B	Other	other
F175B_HUMAN	FAM175B	family with sequence similarity 175 member B	Nucleus	other
F192A_HUMAN	FAM192A	family with sequence similarity 192 member A	Nucleus	other
F207A_HUMAN	FAM207A	family with sequence similarity 207 member A	Other	other
FA21A_HUMAN	FAM21A/FAM21C	family with sequence similarity 21 member C	Cytoplasm	other
FAM3C_HUMAN	FAM3C	family with sequence similarity 3 member C	Extracellular Space	cytokine
FA49A_HUMAN	FAM49A	family with sequence similarity 49 member A	Other	other
FA96A_HUMAN	FAM96A	family with sequence similarity 96 member A	Extracellular Space	other
MIP18_HUMAN	FAM96B	family with sequence similarity 96 member B	Cytoplasm	other
FA98B_HUMAN	FAM98B	family with sequence similarity 98 member B	Nucleus	other
FAN1_HUMAN	FAN1	FANCD2/FANCI-associated nuclease 1	Nucleus	enzyme
FANCA_HUMAN	FANCA	Fanconi anemia complementation group A	Nucleus	other
FACD2_HUMAN	FANCD2	Fanconi anemia complementation group D2	Nucleus	other
FANCI_HUMAN	FANCI	Fanconi anemia complementation group I	Nucleus	other
FAS_HUMAN	FASN	fatty acid synthase	Cytoplasm	enzyme	TVB-2640, orlistat, cerulenin
FBRL_HUMAN	FBL	fibrillarin	Nucleus	other
FBX21_HUMAN	FBXO21	F-box protein 21	Extracellular Space	enzyme
FBX38_HUMAN	FBXO38	F-box protein 38	Other	other
FCHO1_HUMAN	FCHO1	FCH domain only 1	Plasma Membrane	other
FCSD2_HUMAN	FCHSD2	FCH and double SH3 domains 2	Other	other
FCRLA_HUMAN	FCRLA	Fc receptor-like A	Plasma Membrane	other
URP2_HUMAN	FERMT3	fermitin family member 3	Cytoplasm	enzyme
FIP1_HUMAN	FIP1L1	factor interacting with PAPOLA and CPSF1	Nucleus	other
FKBP4_HUMAN	FKBP4	FK506 binding protein 4	Nucleus	enzyme
FKBP5_HUMAN	FKBP5	FK506 binding protein 5	Nucleus	enzyme
FAD1_HUMAN	FLAD1	flavin adenine dinucleotide synthetase 1	Cytoplasm	enzyme
FILA_HUMAN	FLG	filaggrin	Cytoplasm	other
FILA2_HUMAN	FLG2	filaggrin family member 2	Cytoplasm	other
FLI1_HUMAN	FLI1	Fli-1 proto-oncogene, ETS transcription factor	Nucleus	transcription regulator
FLII_HUMAN	FLII	flightless I actin binding protein	Nucleus	other
FLNA_HUMAN	FLNA	filamin A	Cytoplasm	other
FLNB_HUMAN	FLNB	filamin B	Cytoplasm	other
KT3K_HUMAN	FN3KRP	fructosamine 3 kinase related protein	Cytoplasm	kinase
FNBP1_HUMAN	FNBP1	formin binding protein 1	Nucleus	enzyme
FNBP4_HUMAN	FNBP4	formin binding protein 4	Nucleus	other
FOCAD_HUMAN	FOCAD	focadhesin	Plasma Membrane	other
FRPD3_HUMAN	FRMPD3	FERM and PDZ domain containing 3	Other	other
FRYL_HUMAN	FRYL	FRY like transcription coactivator	Other	other
FRIH_HUMAN	FTH1	ferritin, heavy polypeptide 1	Cytoplasm	enzyme
FRIL_HUMAN	FTL	ferritin, light polypeptide	Cytoplasm	enzyme
FUBP1_HUMAN	FUBP1	far upstream element (FUSE) binding protein 1	Nucleus	transcription regulator
FUBP3_HUMAN	FUBP3	far upstream element (FUSE) binding protein 3	Nucleus	transcription regulator
FUS_HUMAN	FUS	FUS RNA binding protein	Nucleus	transcription regulator
FXR1_HUMAN	FXR1	fragile X mental retardation, autosomal homolog 1	Cytoplasm	other
FYCO1_HUMAN	FYCO1	FYVE and coiled-coil domain containing 1	Cytoplasm	other
G3BP1_HUMAN	G3BP1	GTPase activating protein (SH3 domain) binding protein 1	Nucleus	enzyme
G3BP2_HUMAN	G3BP2	GTPase activating protein (SH3 domain) binding protein 2	Cytoplasm	enzyme
G6PD_HUMAN	G6PD	glucose-6-phosphate dehydrogenase	Cytoplasm	enzyme
LYAG_HUMAN	GAA	glucosidase, alpha; acid	Cytoplasm	enzyme	miglitol, acarbose
GALK1_HUMAN	GALK1	galactokinase 1	Cytoplasm	kinase
GAN_HUMAN	GAN	gigaxonin	Cytoplasm	other
GANAB_HUMAN	GANAB	glucosidase, alpha; neutral AB	Cytoplasm	enzyme	miglitol
G3P_HUMAN	GAPDH	glyceraldehyde-3-phosphate dehydrogenase	Cytoplasm	enzyme
GAPD1_HUMAN	GAPVD1	GTPase activating protein and VPS9 domains 1	Cytoplasm	other
SYG_HUMAN	GARS	glycyl-tRNA synthetase	Cytoplasm	enzyme
PUR2_HUMAN	GART	phosphoribosylglycinamide formyltransferase, phosphoribosylglycinamide synthetase, phosphoribosylaminoimidazole synthetase	Cytoplasm	enzyme	bevacizumab/pemetrexed, gemcitabine/pemetrexed, pemetrexed
P66B_HUMAN	GATAD2B	GATA zinc finger domain containing 2B	Nucleus	transcription regulator
NIPS2_HUMAN	GBAS	glioblastoma amplified sequence	Plasma Membrane	other
GLGB_HUMAN	GBE1	glucan (1,4-alpha-), branching enzyme 1	Cytoplasm	enzyme
GBF1_HUMAN	GBF1	golgi brefeldin A resistant guanine nucleotide exchange factor 1	Cytoplasm	other
GCC2_HUMAN	GCC2	GRIP and coiled-coil domain containing 2	Cytoplasm	other
GCN1L_HUMAN	GCN1	GCN1, eIF2 alpha kinase activator homolog	Cytoplasm	translation regulator
GEMI4_HUMAN	GEMIN4	gem nuclear organelle associated protein 4	Nucleus	other
GEMI5_HUMAN	GEMIN5	gem nuclear organelle associated protein 5	Nucleus	other
GFPT1_HUMAN	GFPT1	glutamine--fructose-6-phosphate transaminase 1	Cytoplasm	enzyme
GGA2_HUMAN	GGA2	golgi-associated, gamma adaptin ear containing, ARF binding protein 2	Cytoplasm	transporter
GGPPS_HUMAN	GGPS1	geranylgeranyl diphosphate synthase 1	Cytoplasm	enzyme	zoledronic acid
PERQ1_HUMAN	GIGYF1	GRB10 interacting GYF protein 1	Extracellular Space	other
PERQ2_HUMAN	GIGYF2	GRB10 interacting GYF protein 2	Cytoplasm	other
PSF2_HUMAN	GINS2	GINS complex subunit 2 (Psf2 homolog)	Nucleus	other
AGAL_HUMAN	GLA	galactosidase alpha	Cytoplasm	enzyme
GLMN_HUMAN	GLMN	glomulin, FKBP associated protein	Cytoplasm	other
LGUL_HUMAN	GLO1	glyoxalase I	Cytoplasm	enzyme
GLRX3_HUMAN	GLRX3	glutaredoxin 3	Cytoplasm	enzyme
GLSK_HUMAN	GLS	glutaminase	Cytoplasm	enzyme	CB-839
DHE3_HUMAN	GLUD1	glutamate dehydrogenase 1	Cytoplasm	enzyme
GMIP_HUMAN	GMIP	GEM interacting protein	Cytoplasm	enzyme
GEMI_HUMAN	GMNN	geminin, DNA replication inhibitor	Nucleus	transcription regulator
GMPPA_HUMAN	GMPPA	GDP-mannose pyrophosphorylase A	Cytoplasm	enzyme
GMPPB_HUMAN	GMPPB	GDP-mannose pyrophosphorylase B	Cytoplasm	enzyme
GUAA_HUMAN	GMPS	guanine monophosphate synthase	Nucleus	enzyme	glutamine amidotransferase inhibitor
GBB1_HUMAN	GNB1	guanine nucleotide binding protein (G protein), beta polypeptide 1	Plasma Membrane	enzyme
GBLP_HUMAN	GNB2L1	guanine nucleotide binding protein (G protein), beta polypeptide 2-like 1	Cytoplasm	enzyme
GLCNE_HUMAN	GNE	glucosamine (UDP-N-acetyl)-2-epimerase/N-acetylmannosamine kinase	Cytoplasm	kinase
GNL3_HUMAN	GNL3	guanine nucleotide binding protein-like 3 (nucleolar)	Nucleus	other
GOGA2_HUMAN	GOLGA2	golgin A2	Cytoplasm	other
GOGA3_HUMAN	GOLGA3	golgin A3	Cytoplasm	transporter
GLP3L_HUMAN	GOLPH3L	golgi phosphoprotein 3-like	Cytoplasm	other
GOPC_HUMAN	GOPC	golgi-associated PDZ and coiled-coil motif containing	Cytoplasm	transporter
GOSR1_HUMAN	GOSR1	golgi SNAP receptor complex member 1	Cytoplasm	transporter
GPTC8_HUMAN	GPATCH8	G-patch domain containing 8	Other	other
GPM6A_HUMAN	GPM6A	glycoprotein M6A	Plasma Membrane	ion channel
GPN1_HUMAN	GPN1	GPN-loop GTPase 1	Nucleus	transcription regulator
GPN3_HUMAN	GPN3	GPN-loop GTPase 3	Cytoplasm	other
CSN1_HUMAN	GPS1	G protein pathway suppressor 1	Nucleus	other
GRAP_HUMAN	GRAP	GRB2-related adaptor protein	Cytoplasm	other
GRB2_HUMAN	GRB2	growth factor receptor bound protein 2	Cytoplasm	other
GRAP1_HUMAN	GRIPAP1	GRIP1 associated protein 1	Plasma Membrane	other
GRWD1_HUMAN	GRWD1	glutamate-rich WD repeat containing 1	Nucleus	other
GSTK1_HUMAN	GSTK1	glutathione S-transferase kappa 1	Cytoplasm	enzyme
GSTP1_HUMAN	GSTP1	glutathione S-transferase pi 1	Cytoplasm	enzyme
TF2B_HUMAN	GTF2B	general transcription factor IIB	Nucleus	transcription regulator
T2EA_HUMAN	GTF2E1	general transcription factor IIE subunit 1	Nucleus	transcription regulator
T2EB_HUMAN	GTF2E2	general transcription factor IIE subunit 2	Nucleus	transcription regulator
T2FA_HUMAN	GTF2F1	general transcription factor IIF subunit 1	Nucleus	transcription regulator
T2FB_HUMAN	GTF2F2	general transcription factor IIF subunit 2	Nucleus	transcription regulator
GTF2I_HUMAN	GTF2I	general transcription factor IIi	Nucleus	transcription regulator
TF3C5_HUMAN	GTF3C5	general transcription factor IIIC subunit 5	Nucleus	transcription regulator
GTPB1_HUMAN	GTPBP1	GTP binding protein 1	Cytoplasm	enzyme
NOG1_HUMAN	GTPBP4	GTP binding protein 4	Nucleus	enzyme
ECHA_HUMAN	HADHA	hydroxyacyl-CoA dehydrogenase/3-ketoacyl-CoA thiolase/enoyl-CoA hydratase (trifunctional protein), alpha subunit	Cytoplasm	enzyme
HAT1_HUMAN	HAT1	histone acetyltransferase 1	Nucleus	enzyme
HAUS1_HUMAN	HAUS1	HAUS augmin like complex subunit 1	Nucleus	other
HAUS3_HUMAN	HAUS3	HAUS augmin like complex subunit 3	Cytoplasm	other
HAX1_HUMAN	HAX1	HCLS1 associated protein X-1	Cytoplasm	other
HBS1L_HUMAN	HBS1L	HBS1 like translational GTPase	Cytoplasm	translation regulator
HCLS1_HUMAN	HCLS1	hematopoietic cell-specific Lyn substrate 1	Nucleus	other
HDAC1_HUMAN	HDAC1	histone deacetylase 1	Nucleus	transcription regulator	tributyrin, belinostat, pyroxamide, mocetinostat, HDAC class I inhibitors, bortezomib/vorinostat, 4SC-202, vorinostat, romidepsin
HDAC2_HUMAN	HDAC2	histone deacetylase 2	Nucleus	transcription regulator	tributyrin, belinostat, pyroxamide, histone deacetylase class II inhibitors, bortezomib/vorinostat, chidamide, 4SC-202, vorinostat, romidepsin, theophylline
HDAC6_HUMAN	HDAC6	histone deacetylase 6	Nucleus	transcription regulator	tributyrin, belinostat, pyroxamide, bortezomib/vorinostat, ricolinostat, vorinostat, romidepsin
VIGLN_HUMAN	HDLBP	high density lipoprotein binding protein	Nucleus	transporter
HEAT1_HUMAN	HEATR1	HEAT repeat containing 1	Nucleus	other
HEAT3_HUMAN	HEATR3	HEAT repeat containing 3	Other	other
HTR5B_HUMAN	HEATR5B	HEAT repeat containing 5B	Cytoplasm	other
HECD1_HUMAN	HECTD1	HECT domain containing E3 ubiquitin protein ligase 1	Other	enzyme
HELZ_HUMAN	HELZ	helicase with zinc finger	Nucleus	enzyme
HERC4_HUMAN	HERC4	HECT and RLD domain containing E3 ubiquitin protein ligase 4	Cytoplasm	enzyme
HEXA_HUMAN	HEXA	hexosaminidase A (alpha polypeptide)	Cytoplasm	enzyme
HIF1N_HUMAN	HIF1AN	hypoxia inducible factor 1, alpha subunit inhibitor	Nucleus	enzyme
HINT1_HUMAN	HINT1	histidine triad nucleotide binding protein 1	Nucleus	enzyme
HINT3_HUMAN	HINT3	histidine triad nucleotide binding protein 3	Cytoplasm	other
H15_HUMAN	HIST1H1B	histone cluster 1, H1b	Nucleus	other
H12_HUMAN	HIST1H1C	histone cluster 1, H1c	Nucleus	other
H13_HUMAN	HIST1H1D	histone cluster 1, H1d	Nucleus	other
H2B1H_HUMAN	HIST1H2BH	histone cluster 1, H2bh	Nucleus	other
HXK2_HUMAN	HK2	hexokinase 2	Cytoplasm	kinase
HXK3_HUMAN	HK3	hexokinase 3 (white cell)	Cytoplasm	kinase
1C01_HUMAN	HLA-C	major histocompatibility complex, class I, C	Plasma Membrane	other
DQB1_HUMAN	HLA-DQB1	major histocompatibility complex, class II, DQ beta 1	Plasma Membrane	other
DRA_HUMAN	HLA-DRA	major histocompatibility complex, class II, DR alpha	Plasma Membrane	transmembrane receptor
2B1D_HUMAN	HLA-DRB1	major histocompatibility complex, class II, DR beta 1	Plasma Membrane	transmembrane receptor	apolizumab
DRB3_HUMAN	HLA-DRB3	major histocompatibility complex, class II, DR beta 3	Cytoplasm	other
2B14_HUMAN	HLA-DRB4	major histocompatibility complex, class II, DR beta 4	Plasma Membrane	transmembrane receptor
HMCN1_HUMAN	HMCN1	hemicentin 1	Extracellular Space	other
HMHA1_HUMAN	HMHA1	histocompatibility (minor) HA-1	Cytoplasm	transporter
ROA0_HUMAN	HNRNPA0	heterogeneous nuclear ribonucleoprotein A0	Nucleus	other
ROA1_HUMAN	HNRNPA1	heterogeneous nuclear ribonucleoprotein A1	Nucleus	other
ROA2_HUMAN	HNRNPA2B1	heterogeneous nuclear ribonucleoprotein A2/B1	Nucleus	other
ROA3_HUMAN	HNRNPA3	heterogeneous nuclear ribonucleoprotein A3	Nucleus	other
ROAA_HUMAN	HNRNPAB	heterogeneous nuclear ribonucleoprotein A/B	Nucleus	enzyme
HNRPC_HUMAN	HNRNPC	heterogeneous nuclear ribonucleoprotein C (C1/C2)	Nucleus	other
HNRPD_HUMAN	HNRNPD	heterogeneous nuclear ribonucleoprotein D	Nucleus	transcription regulator
HNRDL_HUMAN	HNRNPDL	heterogeneous nuclear ribonucleoprotein D like	Nucleus	other
HNRPF_HUMAN	HNRNPF	heterogeneous nuclear ribonucleoprotein F	Nucleus	other
HNRH1_HUMAN	HNRNPH1	heterogeneous nuclear ribonucleoprotein H1 (H)	Nucleus	other
HNRH2_HUMAN	HNRNPH2	heterogeneous nuclear ribonucleoprotein H2 (H')	Nucleus	other
HNRH3_HUMAN	HNRNPH3	heterogeneous nuclear ribonucleoprotein H3 (2H9)	Nucleus	other
HNRPK_HUMAN	HNRNPK	heterogeneous nuclear ribonucleoprotein K	Nucleus	transcription regulator
HNRPL_HUMAN	HNRNPL	heterogeneous nuclear ribonucleoprotein L	Nucleus	other
HNRPM_HUMAN	HNRNPM	heterogeneous nuclear ribonucleoprotein M	Nucleus	other
HNRPR_HUMAN	HNRNPR	heterogeneous nuclear ribonucleoprotein R	Nucleus	other
HNRPU_HUMAN	HNRNPU	heterogeneous nuclear ribonucleoprotein U (scaffold attachment factor A)	Nucleus	transporter
HNRL1_HUMAN	HNRNPUL1	heterogeneous nuclear ribonucleoprotein U-like 1	Nucleus	other
HNRL2_HUMAN	HNRNPUL2	heterogeneous nuclear ribonucleoprotein U-like 2	Nucleus	other
HOOK3_HUMAN	HOOK3	hook microtubule-tethering protein 3	Cytoplasm	other
HP1B3_HUMAN	HP1BP3	heterochromatin protein 1, binding protein 3	Nucleus	other
HPRT_HUMAN	HPRT1	hypoxanthine phosphoribosyltransferase 1	Cytoplasm	enzyme	6-mercaptopurine, thioguanine, azathioprine, cyclophosphamide/cytarabine/6-mercaptopurine
RASH_HUMAN	HRAS	Harvey rat sarcoma viral oncogene homolog	Plasma Membrane	enzyme
HORN_HUMAN	HRNR	hornerin	Cytoplasm	other
HCD2_HUMAN	HSD17B10	hydroxysteroid (17-beta) dehydrogenase 10	Cytoplasm	enzyme
DHB8_HUMAN	HSD17B8	hydroxysteroid (17-beta) dehydrogenase 8	Cytoplasm	enzyme
HS90A_HUMAN	HSP90AA1	heat shock protein 90kDa alpha family class A member 1	Cytoplasm	enzyme	alvespimycin, retaspimycin, luminespib, cisplatin
HS90B_HUMAN	HSP90AB1	heat shock protein 90kDa alpha family class B member 1	Cytoplasm	enzyme	alvespimycin, retaspimycin, cisplatin
ENPL_HUMAN	HSP90B1	heat shock protein 90kDa beta family member 1	Cytoplasm	other	alvespimycin, retaspimycin, cisplatin
HS71L_HUMAN	HSPA1L	heat shock protein family A (Hsp70) member 1 like	Cytoplasm	other
HSP72_HUMAN	HSPA2	heat shock protein family A (Hsp70) member 2	Cytoplasm	other
HSP74_HUMAN	HSPA4	heat shock protein family A (Hsp70) member 4	Cytoplasm	other
GRP78_HUMAN	HSPA5	heat shock protein family A (Hsp70) member 5	Cytoplasm	enzyme
HSP76_HUMAN	HSPA6	heat shock protein family A (Hsp70) member 6	Nucleus	enzyme
HSP7C_HUMAN	HSPA8	heat shock protein family A (Hsp70) member 8	Cytoplasm	enzyme
GRP75_HUMAN	HSPA9	heat shock protein family A (Hsp70) member 9	Cytoplasm	other
HPBP1_HUMAN	HSPBP1	HSPA (heat shock 70kDa) binding protein, cytoplasmic cochaperone 1	Cytoplasm	other
CH60_HUMAN	HSPD1	heat shock protein family D (Hsp60) member 1	Cytoplasm	enzyme
HS105_HUMAN	HSPH1	heat shock protein family H (Hsp110) member 1	Cytoplasm	other
HTSF1_HUMAN	HTATSF1	HIV-1 Tat specific factor 1	Nucleus	transcription regulator
HUWE1_HUMAN	HUWE1	HECT, UBA and WWE domain containing 1, E3 ubiquitin protein ligase	Nucleus	transcription regulator
HYOU1_HUMAN	HYOU1	hypoxia up-regulated 1	Cytoplasm	other
SYIC_HUMAN	IARS	isoleucyl-tRNA synthetase	Cytoplasm	enzyme
ICAM1_HUMAN	ICAM1	intercellular adhesion molecule 1	Plasma Membrane	transmembrane receptor
IDE_HUMAN	IDE	insulin-degrading enzyme	Extracellular Space	peptidase	bacitracin
IDH3A_HUMAN	IDH3A	isocitrate dehydrogenase 3 (NAD+) alpha	Cytoplasm	enzyme
GILT_HUMAN	IFI30	interferon, gamma-inducible protein 30	Cytoplasm	enzyme
IGBP1_HUMAN	IGBP1	immunoglobulin (CD79A) binding protein 1	Cytoplasm	phosphatase
IF2B3_HUMAN	IGF2BP3	insulin like growth factor 2 mRNA binding protein 3	Cytoplasm	translation regulator
IGHM_HUMAN	IGHM	immunoglobulin heavy constant mu	Plasma Membrane	transmembrane receptor
IGKC_HUMAN	IGKC	immunoglobulin kappa constant	Extracellular Space	other
ELP1_HUMAN	IKBKAP	inhibitor of kappa light polypeptide gene enhancer in B-cells, kinase complex-associated protein	Cytoplasm	other
IKKB_HUMAN	IKBKB	inhibitor of kappa light polypeptide gene enhancer in B-cells, kinase beta	Cytoplasm	kinase	IKKbeta inhibitor, auranofin
NEMO_HUMAN	IKBKG	inhibitor of kappa light polypeptide gene enhancer in B-cells, kinase gamma	Nucleus	kinase
IKZF1_HUMAN	IKZF1	IKAROS family zinc finger 1	Nucleus	transcription regulator
ILF2_HUMAN	ILF2	interleukin enhancer binding factor 2	Nucleus	transcription regulator
ILF3_HUMAN	ILF3	interleukin enhancer binding factor 3	Nucleus	transcription regulator
IMDH1_HUMAN	IMPDH1	IMP (inosine 5'-monophosphate) dehydrogenase 1	Cytoplasm	enzyme	thioguanine, VX-944, pegintron/ribavirin, PEG-interferon alfa-2a/ribavirin, nitazoxanide/peginterferon alfa-2a/ribavirin, interferon alfacon-1/ribavirin, interferon alfa-2b/ribavirin, mycophenolate mofetil, mycophenolic acid, ribavirin
IMDH2_HUMAN	IMPDH2	IMP (inosine 5'-monophosphate) dehydrogenase 2	Cytoplasm	enzyme	thioguanine, VX-944, pegintron/ribavirin, interferon alfacon-1/ribavirin, interferon alfa-2b/ribavirin, mycophenolate mofetil, mycophenolic acid, ribavirin
INADL_HUMAN	INADL	InaD-like (Drosophila)	Plasma Membrane	other
I5P2_HUMAN	INPP5B	inositol polyphosphate-5-phosphatase B	Plasma Membrane	phosphatase
SHIP1_HUMAN	INPP5D	inositol polyphosphate-5-phosphatase D	Cytoplasm	phosphatase
INT3_HUMAN	INTS3	integrator complex subunit 3	Nucleus	other
INT7_HUMAN	INTS7	integrator complex subunit 7	Nucleus	other
INT9_HUMAN	INTS9	integrator complex subunit 9	Nucleus	other
IPO11_HUMAN	IPO11	importin 11	Nucleus	transporter
IPO13_HUMAN	IPO13	importin 13	Nucleus	transporter
IPO4_HUMAN	IPO4	importin 4	Nucleus	transporter
IPO5_HUMAN	IPO5	importin 5	Nucleus	transporter
IPO7_HUMAN	IPO7	importin 7	Nucleus	transporter
IPO8_HUMAN	IPO8	importin 8	Nucleus	transporter
IPO9_HUMAN	IPO9	importin 9	Nucleus	transporter
IQGA1_HUMAN	IQGAP1	IQ motif containing GTPase activating protein 1	Cytoplasm	other
IRAK1_HUMAN	IRAK1	interleukin 1 receptor associated kinase 1	Plasma Membrane	kinase
IREB2_HUMAN	IREB2	iron responsive element binding protein 2	Cytoplasm	translation regulator
IRF8_HUMAN	IRF8	interferon regulatory factor 8	Nucleus	transcription regulator
ISG20_HUMAN	ISG20	interferon stimulated exonuclease gene 20kDa	Nucleus	enzyme
ITCH_HUMAN	ITCH	itchy E3 ubiquitin protein ligase	Nucleus	enzyme
ITPA_HUMAN	ITPA	inosine triphosphatase	Cytoplasm	enzyme
ITSN2_HUMAN	ITSN2	intersectin 2	Cytoplasm	other
JAK1_HUMAN	JAK1	Janus kinase 1	Cytoplasm	kinase	tofacitinib, ruxolitinib, momelotinib, INCB039110, INCB052793
KANK1_HUMAN	KANK1	KN motif and ankyrin repeat domains 1	Nucleus	transcription regulator
KANK2_HUMAN	KANK2	KN motif and ankyrin repeat domains 2	Nucleus	transcription regulator
SYK_HUMAN	KARS	lysyl-tRNA synthetase	Cytoplasm	enzyme
KATL2_HUMAN	KATNAL2	katanin p60 subunit A-like 2	Other	other
KCAB2_HUMAN	KCNAB2	potassium channel, voltage gated subfamily A regulatory beta subunit 2	Plasma Membrane	ion channel
KCNH8_HUMAN	KCNH8	potassium channel, voltage gated eag related subfamily H, member 8	Plasma Membrane	ion channel
KCNT1_HUMAN	KCNT1	potassium channel, sodium activated subfamily T, member 1	Plasma Membrane	ion channel
KCTD5_HUMAN	KCTD5	potassium channel tetramerization domain containing 5	Cytoplasm	other
KCTD9_HUMAN	KCTD9	potassium channel tetramerization domain containing 9	Other	other
KDM5D_HUMAN	KDM5D	lysine (K)-specific demethylase 5D	Nucleus	other
KHDR1_HUMAN	KHDRBS1	KH domain containing, RNA binding, signal transduction associated 1	Nucleus	transcription regulator	CWP232291
FUBP2_HUMAN	KHSRP	KH-type splicing regulatory protein	Nucleus	enzyme
STRUM_HUMAN	KIAA0196	KIAA0196	Cytoplasm	other
ECM29_HUMAN	KIAA0368	KIAA0368	Cytoplasm	other
WASH7_HUMAN	KIAA1033	KIAA1033	Cytoplasm	other
CIP2A_HUMAN	KIAA1524	KIAA1524	Cytoplasm	other
KIF15_HUMAN	KIF15	kinesin family member 15	Nucleus	other
KIF3A_HUMAN	KIF3A	kinesin family member 3A	Cytoplasm	enzyme
KIF3B_HUMAN	KIF3B	kinesin family member 3B	Cytoplasm	transporter
KINH_HUMAN	KIF5B	kinesin family member 5B	Cytoplasm	other
KIFC1_HUMAN	KIFC1	kinesin family member C1	Nucleus	enzyme
KIN17_HUMAN	KIN	Kin17 DNA and RNA binding protein	Nucleus	other
KLC1_HUMAN	KLC1	kinesin light chain 1	Cytoplasm	other
KLC4_HUMAN	KLC4	kinesin light chain 4	Other	other
KLF6_HUMAN	KLF6	Kruppel-like factor 6	Nucleus	transcription regulator
KLH18_HUMAN	KLHL18	kelch like family member 18	Other	other
KNTC1_HUMAN	KNTC1	kinetochore associated 1	Nucleus	other
IMA5_HUMAN	KPNA1	karyopherin alpha 1	Nucleus	transporter
IMA1_HUMAN	KPNA2	karyopherin alpha 2 (RAG cohort 1, importin alpha 1)	Nucleus	transporter
IMA4_HUMAN	KPNA3	karyopherin alpha 3 (importin alpha 4)	Nucleus	transporter
IMA3_HUMAN	KPNA4	karyopherin alpha 4 (importin alpha 3)	Nucleus	transporter
IMA7_HUMAN	KPNA6	karyopherin alpha 6 (importin alpha 7)	Nucleus	transporter
IMB1_HUMAN	KPNB1	karyopherin (importin) beta 1	Nucleus	transporter
K2C6A_HUMAN	KRT6A	keratin 6A, type II	Cytoplasm	other
LAGE3_HUMAN	LAGE3	L antigen family member 3	Other	other
LAMA5_HUMAN	LAMA5	laminin subunit alpha 5	Extracellular Space	other
LAMP1_HUMAN	LAMP1	lysosomal associated membrane protein 1	Plasma Membrane	other
LAMP2_HUMAN	LAMP2	lysosomal associated membrane protein 2	Plasma Membrane	enzyme
LANC1_HUMAN	LANCL1	LanC like 1	Plasma Membrane	other
LARP1_HUMAN	LARP1	La ribonucleoprotein domain family member 1	Cytoplasm	translation regulator
LARP4_HUMAN	LARP4	La ribonucleoprotein domain family member 4	Other	other
LARP7_HUMAN	LARP7	La ribonucleoprotein domain family member 7	Nucleus	other
SYLC_HUMAN	LARS	leucyl-tRNA synthetase	Cytoplasm	enzyme
LAS1L_HUMAN	LAS1L	LAS1-like, ribosome biogenesis factor	Nucleus	other
LASP1_HUMAN	LASP1	LIM and SH3 protein 1	Cytoplasm	transporter
LCN1_HUMAN	LCN1	lipocalin 1	Extracellular Space	transporter
PLSL_HUMAN	LCP1	lymphocyte cytosolic protein 1 (L-plastin)	Cytoplasm	other
LDHA_HUMAN	LDHA	lactate dehydrogenase A	Cytoplasm	enzyme
LDHB_HUMAN	LDHB	lactate dehydrogenase B	Cytoplasm	enzyme
LDLR_HUMAN	LDLR	low density lipoprotein receptor	Plasma Membrane	transporter
LEO1_HUMAN	LEO1	LEO1 homolog, Paf1/RNA polymerase II complex component	Nucleus	other
LGMN_HUMAN	LGMN	legumain	Cytoplasm	peptidase
LIMK1_HUMAN	LIMK1	LIM domain kinase 1	Cytoplasm	kinase	dabrafenib, dabrafenib/trametinib
LMAN2_HUMAN	LMAN2	lectin, mannose-binding 2	Cytoplasm	transporter
LMNB1_HUMAN	LMNB1	lamin B1	Nucleus	other
LCAP_HUMAN	LNPEP	leucyl/cystinyl aminopeptidase	Cytoplasm	peptidase
PWP2_HUMAN	LOC102724159/PWP2	PWP2 periodic tryptophan protein homolog (yeast)	Nucleus	other
LONM_HUMAN	LONP1	lon peptidase 1, mitochondrial	Cytoplasm	peptidase
PCAT1_HUMAN	LPCAT1	lysophosphatidylcholine acyltransferase 1	Cytoplasm	enzyme
LPXN_HUMAN	LPXN	leupaxin	Cytoplasm	transcription regulator
LRBA_HUMAN	LRBA	LPS-responsive vesicle trafficking, beach and anchor containing	Cytoplasm	other
LRMP_HUMAN	LRMP	lymphoid-restricted membrane protein	Cytoplasm	other
LPPRC_HUMAN	LRPPRC	leucine rich pentatricopeptide repeat containing	Cytoplasm	other
LRC8A_HUMAN	LRRC8A	leucine-rich repeat containing 8 family member A	Extracellular Space	other
LRRF1_HUMAN	LRRFIP1	leucine rich repeat (in FLII) interacting protein 1	Cytoplasm	other
LRRK1_HUMAN	LRRK1	leucine-rich repeat kinase 1	Cytoplasm	kinase
LSM12_HUMAN	LSM12	LSM12 homolog	Other	other
LS14A_HUMAN	LSM14A	LSM14A mRNA processing body assembly factor	Cytoplasm	other
LSM4_HUMAN	LSM4	LSM4 homolog, U6 small nuclear RNA and mRNA degradation associated	Nucleus	other
LSP1_HUMAN	LSP1	lymphocyte-specific protein 1	Cytoplasm	other
LTN1_HUMAN	LTN1	listerin E3 ubiquitin protein ligase 1	Nucleus	enzyme
LTV1_HUMAN	LTV1	LTV1 ribosome biogenesis factor	Other	other
LC7L2_HUMAN	LUC7L2	LUC7-like 2 pre-mRNA splicing factor	Other	other
LYAR_HUMAN	LYAR	Ly1 antibody reactive	Plasma Membrane	other
LYPA1_HUMAN	LYPLA1	lysophospholipase I	Cytoplasm	enzyme
LYPA2_HUMAN	LYPLA2	lysophospholipase II	Cytoplasm	enzyme
LYPL1_HUMAN	LYPLAL1	lysophospholipase-like 1	Cytoplasm	enzyme
MPRD_HUMAN	M6PR	mannose-6-phosphate receptor (cation dependent)	Cytoplasm	transporter	alglucosidase alfa
MACF1_HUMAN	MACF1	microtubule-actin crosslinking factor 1	Cytoplasm	enzyme
MD1L1_HUMAN	MAD1L1	MAD1 mitotic arrest deficient-like 1 (yeast)	Nucleus	other
MD2L1_HUMAN	MAD2L1	MAD2 mitotic arrest deficient-like 1 (yeast)	Nucleus	other
MAEL_HUMAN	MAEL	maelstrom spermatogenic transposon silencer	Nucleus	other
MAGD2_HUMAN	MAGED2	MAGE family member D2	Plasma Membrane	other
MALT1_HUMAN	MALT1	MALT1 paracaspase	Cytoplasm	peptidase
MAP1S_HUMAN	MAP1S	microtubule associated protein 1S	Cytoplasm	enzyme
M3K4_HUMAN	MAP3K4	mitogen-activated protein kinase kinase kinase 4	Cytoplasm	kinase
MAP4_HUMAN	MAP4	microtubule associated protein 4	Cytoplasm	other
M4K4_HUMAN	MAP4K4	mitogen-activated protein kinase kinase kinase kinase 4	Cytoplasm	kinase
MK01_HUMAN	MAPK1	mitogen-activated protein kinase 1	Cytoplasm	kinase	MAP kinase1 inhibitor, binimetinib, ulixertinib, LY-3007113, pexmetinib
MK14_HUMAN	MAPK14	mitogen-activated protein kinase 14	Cytoplasm	kinase	talmapimod, RO-3201195, p38 MAP kinase inhibitor
MISSL_HUMAN	MAPK1IP1L	mitogen-activated protein kinase 1 interacting protein 1-like	Nucleus	other
MK03_HUMAN	MAPK3	mitogen-activated protein kinase 3	Cytoplasm	kinase	ulixertinib
MARE1_HUMAN	MAPRE1	microtubule associated protein RP/EB family member 1	Cytoplasm	other
MARE2_HUMAN	MAPRE2	microtubule associated protein RP/EB family member 2	Cytoplasm	other
SYMC_HUMAN	MARS	methionyl-tRNA synthetase	Cytoplasm	enzyme
GWL_HUMAN	MASTL	microtubule associated serine/threonine kinase like	Cytoplasm	kinase
METK2_HUMAN	MAT2A	methionine adenosyltransferase II, alpha	Cytoplasm	enzyme
MAT2B_HUMAN	MAT2B	methionine adenosyltransferase II, beta	Cytoplasm	enzyme
MATR3_HUMAN	MATR3	matrin 3	Nucleus	other
MBD3_HUMAN	MBD3	methyl-CpG binding domain protein 3	Nucleus	other
MCCB_HUMAN	MCCC2	methylcrotonoyl-CoA carboxylase 2	Cytoplasm	enzyme
MCM2_HUMAN	MCM2	minichromosome maintenance complex component 2	Nucleus	enzyme
MCM3_HUMAN	MCM3	minichromosome maintenance complex component 3	Nucleus	enzyme
MCM4_HUMAN	MCM4	minichromosome maintenance complex component 4	Nucleus	enzyme
MCM5_HUMAN	MCM5	minichromosome maintenance complex component 5	Nucleus	enzyme
MCM6_HUMAN	MCM6	minichromosome maintenance complex component 6	Nucleus	enzyme
MCM7_HUMAN	MCM7	minichromosome maintenance complex component 7	Nucleus	enzyme
MCMBP_HUMAN	MCMBP	minichromosome maintenance complex binding protein	Nucleus	other
MDN1_HUMAN	MDN1	midasin AAA ATPase 1	Nucleus	other
MAOM_HUMAN	ME2	malic enzyme 2, NAD(+)-dependent, mitochondrial	Cytoplasm	enzyme
MED20_HUMAN	MED20	mediator complex subunit 20	Nucleus	transcription regulator
MED30_HUMAN	MED30	mediator complex subunit 30	Nucleus	transcription regulator
MED4_HUMAN	MED4	mediator complex subunit 4	Nucleus	transcription regulator
MEMO1_HUMAN	MEMO1	mediator of cell motility 1	Cytoplasm	other
MEPCE_HUMAN	MEPCE	methylphosphate capping enzyme	Other	enzyme
M1IP1_HUMAN	MID1IP1	MID1 interacting protein 1	Cytoplasm	other
MIO_HUMAN	MIOS	missing oocyte, meiosis regulator, homolog (Drosophila)	Cytoplasm	other
MLF2_HUMAN	MLF2	myeloid leukemia factor 2	Nucleus	other
MLH1_HUMAN	MLH1	mutL homolog 1	Nucleus	enzyme
MMAA_HUMAN	MMAA	methylmalonic aciduria (cobalamin deficiency) cblA type	Cytoplasm	other
MMS19_HUMAN	MMS19	MMS19 homolog, cytosolic iron-sulfur assembly component	Nucleus	transcription regulator
MOB1A_HUMAN	MOB1A	MOB kinase activator 1A	Plasma Membrane	other
MOB3A_HUMAN	MOB3A	MOB kinase activator 3A	Other	other
MOC2B_HUMAN	MOCS2	molybdenum cofactor synthesis 2	Cytoplasm	enzyme
MON2_HUMAN	MON2	MON2 homolog, regulator of endosome-to-Golgi trafficking	Cytoplasm	other
THTM_HUMAN	MPST	mercaptopyruvate sulfurtransferase	Cytoplasm	enzyme
RT26_HUMAN	MRPS26	mitochondrial ribosomal protein S26	Cytoplasm	other
RT31_HUMAN	MRPS31	mitochondrial ribosomal protein S31	Cytoplasm	other
MRT4_HUMAN	MRTO4	MRT4 homolog, ribosome maturation factor	Cytoplasm	other
CD20_HUMAN	MS4A1	membrane-spanning 4-domains subfamily A member 1	Plasma Membrane	other	tositumomab, rituximab, ofatumumab, veltuzumab, methotrexate/ofatumumab, brentuximab vedotin, ocrelizumab, SBI-087, bortezomib/cladribine/rituximab, PF-5212374, obinutuzumab, cyclophosphamide/fludarabine phosphate/rituximab, methotrexate/rituximab, rituximab/temozolomide, methotrexate/rituximab/temozolomide, cyclophosphamide/dexamethasone/rituximab, fludarabine phosphate/rituximab, rituximab/thal…
MSH2_HUMAN	MSH2	mutS homolog 2	Nucleus	enzyme
MSH6_HUMAN	MSH6	mutS homolog 6	Nucleus	enzyme
MSI2H_HUMAN	MSI2	musashi RNA binding protein 2	Cytoplasm	other
MSLN_HUMAN	MSLN	mesothelin	Extracellular Space	other	amatuximab
MSTO1_HUMAN	MSTO1	misato 1, mitochondrial distribution and morphology regulator	Cytoplasm	other
MTA2_HUMAN	MTA2	metastasis associated 1 family member 2	Nucleus	transcription regulator
MTAP_HUMAN	MTAP	methylthioadenosine phosphorylase	Nucleus	enzyme
C1TC_HUMAN	MTHFD1	methylenetetrahydrofolate dehydrogenase (NADP+ dependent) 1, methenyltetrahydrofolate cyclohydrolase, formyltetrahydrofolate synthetase	Cytoplasm	enzyme
C1TM_HUMAN	MTHFD1L	methylenetetrahydrofolate dehydrogenase (NADP+ dependent) 1-like	Cytoplasm	enzyme
MTDC_HUMAN	MTHFD2	methylenetetrahydrofolate dehydrogenase (NADP+ dependent) 2, methenyltetrahydrofolate cyclohydrolase	Cytoplasm	enzyme
MTOR_HUMAN	MTOR	mechanistic target of rapamycin (serine/threonine kinase)	Nucleus	kinase	ridaforolimus, OSI-027, methotrexate/sirolimus/tacrolimus, dactolisib, AZD2014, apitolisib, PKI-179, everolimus/exemestane, lenalidomide/temsirolimus, cc-223, PF-05212384, imatinib/sirolimus, cyclophosphamide/sirolimus, P7170, cyclosporine A/sirolimus/tacrolimus, everolimus/panobinostat, everolimus/pasireotide, mTOR inhibitor, PWT33597, PQR309, VS-5584, everolimus/prednisone, everolimus/sorafenib…
METH_HUMAN	MTR	5-methyltetrahydrofolate-homocysteine methyltransferase	Cytoplasm	enzyme	hydroxocobalamin, cyanocobalamin
MBB1A_HUMAN	MYBBP1A	MYB binding protein (P160) 1a	Nucleus	transcription regulator
MYH10_HUMAN	MYH10	myosin, heavy chain 10, non-muscle	Cytoplasm	other
MYH9_HUMAN	MYH9	myosin, heavy chain 9, non-muscle	Cytoplasm	enzyme
MYL1_HUMAN	MYL1	myosin light chain 1	Cytoplasm	other
ML12A_HUMAN	MYL12A	myosin light chain 12A	Cytoplasm	other
MYL6_HUMAN	MYL6	myosin light chain 6	Cytoplasm	other
MYO1E_HUMAN	MYO1E	myosin IE	Cytoplasm	enzyme
MYO9B_HUMAN	MYO9B	myosin IXB	Cytoplasm	enzyme
NACA_HUMAN	NACA	nascent polypeptide-associated complex alpha subunit	Cytoplasm	transcription regulator
ULA1_HUMAN	NAE1	NEDD8 activating enzyme E1 subunit 1	Cytoplasm	enzyme
NAF1_HUMAN	NAF1	nuclear assembly factor 1 ribonucleoprotein	Cytoplasm	other
NAGK_HUMAN	NAGK	N-acetylglucosamine kinase	Cytoplasm	kinase
NAMPT_HUMAN	NAMPT	nicotinamide phosphoribosyltransferase	Extracellular Space	cytokine
NP1L1_HUMAN	NAP1L1	nucleosome assembly protein 1-like 1	Nucleus	other
NP1L4_HUMAN	NAP1L4	nucleosome assembly protein 1-like 4	Cytoplasm	other
NARFL_HUMAN	NARFL	nuclear prelamin A recognition factor-like	Other	other
SYNC_HUMAN	NARS	asparaginyl-tRNA synthetase	Cytoplasm	enzyme
SYNM_HUMAN	NARS2	asparaginyl-tRNA synthetase 2, mitochondrial (putative)	Cytoplasm	enzyme
NASP_HUMAN	NASP	nuclear autoantigenic sperm protein (histone-binding)	Nucleus	other
NAT10_HUMAN	NAT10	N-acetyltransferase 10 (GCN5-related)	Nucleus	enzyme
NAV2_HUMAN	NAV2	neuron navigator 2	Nucleus	other
NAV3_HUMAN	NAV3	neuron navigator 3	Nucleus	other
NBEA_HUMAN	NBEA	neurobeachin	Cytoplasm	other
NBEL2_HUMAN	NBEAL2	neurobeachin like 2	Cytoplasm	other
CND1_HUMAN	NCAPD2	non-SMC condensin I complex subunit D2	Nucleus	other
CNDD3_HUMAN	NCAPD3	non-SMC condensin II complex subunit D3	Nucleus	other
CND3_HUMAN	NCAPG	non-SMC condensin I complex subunit G	Nucleus	other
CNDH2_HUMAN	NCAPH2	non-SMC condensin II complex subunit H2	Nucleus	other
NCBP1_HUMAN	NCBP1	nuclear cap binding protein subunit 1	Nucleus	other
NCBP2_HUMAN	NCBP2	nuclear cap binding protein subunit 2	Nucleus	other
NCKPL_HUMAN	NCKAP1L	NCK associated protein 1 like	Plasma Membrane	other
SPN90_HUMAN	NCKIPSD	NCK interacting protein with SH3 domain	Other	other
NUCL_HUMAN	NCL	nucleolin	Nucleus	other
NCOR1_HUMAN	NCOR1	nuclear receptor corepressor 1	Nucleus	transcription regulator
NCOR2_HUMAN	NCOR2	nuclear receptor corepressor 2	Nucleus	transcription regulator
NICA_HUMAN	NCSTN	nicastrin	Plasma Membrane	peptidase
NDC80_HUMAN	NDC80	NDC80 kinetochore complex component	Nucleus	other
NDE1_HUMAN	NDE1	nudE neurodevelopment protein 1	Nucleus	other
NDUA8_HUMAN	NDUFA8	NADH:ubiquinone oxidoreductase subunit A8	Cytoplasm	enzyme
NDUS3_HUMAN	NDUFS3	NADH:ubiquinone oxidoreductase core subunit S3	Cytoplasm	enzyme
NDUV2_HUMAN	NDUFV2	NADH:ubiquinone oxidoreductase core subunit V2	Cytoplasm	enzyme
NEBU_HUMAN	NEB	nebulin	Cytoplasm	other
NED4L_HUMAN	NEDD4L	neural precursor cell expressed, developmentally down-regulated 4-like, E3 ubiquitin protein ligase	Cytoplasm	enzyme
NEK9_HUMAN	NEK9	NIMA related kinase 9	Nucleus	kinase
NELFA_HUMAN	NELFA	negative elongation factor complex member A	Nucleus	other
NELFB_HUMAN	NELFB	negative elongation factor complex member B	Nucleus	other
NELFD_HUMAN	NELFCD	negative elongation factor complex member C/D	Nucleus	other
NELFE_HUMAN	NELFE	negative elongation factor complex member E	Nucleus	other
NEST_HUMAN	NES	nestin	Other	other
NF1_HUMAN	NF1	neurofibromin 1	Cytoplasm	other
NFAC4_HUMAN	NFATC4	nuclear factor of activated T-cells, cytoplasmic, calcineurin-dependent 4	Nucleus	transcription regulator
NFKB1_HUMAN	NFKB1	nuclear factor of kappa light polypeptide gene enhancer in B-cells 1	Nucleus	transcription regulator	dexamethasone/thalidomide, bortezomib/dexamethasone/thalidomide, rituximab/thalidomide, bortezomib/thalidomide, prednisone/thalidomide, triflusal, thalidomide
NFKB2_HUMAN	NFKB2	nuclear factor of kappa light polypeptide gene enhancer in B-cells 2 (p49/p100)	Nucleus	transcription regulator
IKBA_HUMAN	NFKBIA	nuclear factor of kappa light polypeptide gene enhancer in B-cells inhibitor, alpha	Cytoplasm	transcription regulator
IKBB_HUMAN	NFKBIB	nuclear factor of kappa light polypeptide gene enhancer in B-cells inhibitor, beta	Nucleus	transcription regulator
IKBE_HUMAN	NFKBIE	nuclear factor of kappa light polypeptide gene enhancer in B-cells inhibitor, epsilon	Nucleus	transcription regulator
NGLY1_HUMAN	NGLY1	N-glycanase 1	Cytoplasm	enzyme
NHP2_HUMAN	NHP2	NHP2 ribonucleoprotein	Nucleus	other
NIT1_HUMAN	NIT1	nitrilase 1	Cytoplasm	enzyme
NALP2_HUMAN	NLRP2	NLR family, pyrin domain containing 2	Nucleus	other
NMD3_HUMAN	NMD3	NMD3 ribosome export adaptor	Nucleus	other
NDKA_HUMAN	NME1	NME/NM23 nucleoside diphosphate kinase 1	Cytoplasm	kinase
NOC3L_HUMAN	NOC3L	NOC3-like DNA replication regulator	Nucleus	other
NOC4L_HUMAN	NOC4L	nucleolar complex associated 4 homolog	Nucleus	other
NOL6_HUMAN	NOL6	nucleolar protein 6	Nucleus	other
NONO_HUMAN	NONO	non-POU domain containing, octamer-binding	Nucleus	other
NOP14_HUMAN	NOP14	NOP14 nucleolar protein	Nucleus	other
NOP2_HUMAN	NOP2	NOP2 nucleolar protein	Nucleus	other
NOP56_HUMAN	NOP56	NOP56 ribonucleoprotein	Nucleus	other
NOP58_HUMAN	NOP58	NOP58 ribonucleoprotein	Nucleus	enzyme
NOTC4_HUMAN	NOTCH4	notch 4	Plasma Membrane	transcription regulator
PSA_HUMAN	NPEPPS	aminopeptidase puromycin sensitive	Cytoplasm	peptidase
NPL4_HUMAN	NPLOC4	NPL4 homolog, ubiquitin recognition factor	Nucleus	other
NPM_HUMAN	NPM1	nucleophosmin (nucleolar phosphoprotein B23, numatrin)	Nucleus	transcription regulator
NQO2_HUMAN	NQO2	NAD(P)H dehydrogenase, quinone 2	Cytoplasm	enzyme
MCR_HUMAN	NR3C2	nuclear receptor subfamily 3 group C member 2	Nucleus	ligand-dependent nuclear receptor	fludrocortisone, aldosterone receptor antagonist, drospirenone/ethinyl estradiol, hydrochlorothiazide/spironolactone, fludrocortisone acetate, drospirenone, spironolactone, eplerenone, progesterone
NSF1C_HUMAN	NSFL1C	NSFL1 (p97) cofactor (p47)	Cytoplasm	other
MAGG1_HUMAN	NSMCE3	NSE3 homolog, SMC5-SMC6 complex component	Nucleus	other
NSUN2_HUMAN	NSUN2	NOP2/Sun RNA methyltransferase family member 2	Nucleus	enzyme
5NTC_HUMAN	NT5C2	5'-nucleotidase, cytosolic II	Cytoplasm	phosphatase
NTM1A_HUMAN	NTMT1	N-terminal Xaa-Pro-Lys N-methyltransferase 1	Nucleus	enzyme
NTPCR_HUMAN	NTPCR	nucleoside-triphosphatase, cancer-related	Cytoplasm	other
NUB1_HUMAN	NUB1	negative regulator of ubiquitin-like proteins 1	Nucleus	other
NUBP2_HUMAN	NUBP2	nucleotide binding protein 2	Nucleus	other
NUCB1_HUMAN	NUCB1	nucleobindin 1	Cytoplasm	other
NUCB2_HUMAN	NUCB2	nucleobindin 2	Nucleus	other
NUDC_HUMAN	NUDC	nudC nuclear distribution protein	Cytoplasm	other
NUDC3_HUMAN	NUDCD3	NudC domain containing 3	Other	other
8ODP_HUMAN	NUDT1	nudix hydrolase 1	Extracellular Space	phosphatase
CPSF5_HUMAN	NUDT21	nudix hydrolase 21	Nucleus	other
NUDT5_HUMAN	NUDT5	nudix hydrolase 5	Cytoplasm	phosphatase
NUF2_HUMAN	NUF2	NUF2, NDC80 kinetochore complex component	Nucleus	other
NU107_HUMAN	NUP107	nucleoporin 107kDa	Nucleus	transporter
NU133_HUMAN	NUP133	nucleoporin 133kDa	Nucleus	transporter
NU155_HUMAN	NUP155	nucleoporin 155kDa	Nucleus	transporter
NU188_HUMAN	NUP188	nucleoporin 188kDa	Nucleus	other
NU205_HUMAN	NUP205	nucleoporin 205kDa	Nucleus	other
NU214_HUMAN	NUP214	nucleoporin 214kDa	Nucleus	transporter
NUP37_HUMAN	NUP37	nucleoporin 37kDa	Nucleus	transporter
NUP43_HUMAN	NUP43	nucleoporin 43kDa	Nucleus	transporter
NUP50_HUMAN	NUP50	nucleoporin 50kDa	Nucleus	transporter
NUP54_HUMAN	NUP54	nucleoporin 54kDa	Nucleus	transporter
NUP62_HUMAN	NUP62	nucleoporin 62kDa	Nucleus	transporter
NUP85_HUMAN	NUP85	nucleoporin 85kDa	Cytoplasm	other
NUP88_HUMAN	NUP88	nucleoporin 88kDa	Nucleus	transporter
NUP93_HUMAN	NUP93	nucleoporin 93kDa	Nucleus	other
NXF1_HUMAN	NXF1	nuclear RNA export factor 1	Nucleus	transporter
OAS2_HUMAN	OAS2	2'-5'-oligoadenylate synthetase 2	Cytoplasm	enzyme
ODO1_HUMAN	OGDH	oxoglutarate (alpha-ketoglutarate) dehydrogenase (lipoamide)	Cytoplasm	enzyme
OGFR_HUMAN	OGFR	opioid growth factor receptor	Plasma Membrane	other	enkephalin, methionine
OGRL1_HUMAN	OGFRL1	opioid growth factor receptor-like 1	Other	other
OGT1_HUMAN	OGT	O-linked N-acetylglucosamine (GlcNAc) transferase	Cytoplasm	enzyme
MS18B_HUMAN	OIP5	Opa interacting protein 5	Nucleus	other
OLA1_HUMAN	OLA1	Obg-like ATPase 1	Cytoplasm	enzyme
OSBL3_HUMAN	OSBPL3	oxysterol binding protein like 3	Cytoplasm	other
OSGEP_HUMAN	OSGEP	O-sialoglycoprotein endopeptidase	Other	peptidase
OSTF1_HUMAN	OSTF1	osteoclast stimulating factor 1	Nucleus	transcription regulator
OTUB1_HUMAN	OTUB1	OTU deubiquitinase, ubiquitin aldehyde binding 1	Cytoplasm	enzyme
OTUD4_HUMAN	OTUD4	OTU deubiquitinase 4	Other	peptidase
OTUD5_HUMAN	OTUD5	OTU deubiquitinase 5	Cytoplasm	enzyme
OTU6B_HUMAN	OTUD6B	OTU domain containing 6B	Other	other
P3H1_HUMAN	P3H1	prolyl 3-hydroxylase 1	Nucleus	enzyme
P4HA1_HUMAN	P4HA1	prolyl 4-hydroxylase, alpha polypeptide I	Cytoplasm	enzyme
PDIA1_HUMAN	P4HB	prolyl 4-hydroxylase, beta polypeptide	Cytoplasm	enzyme
PA2G4_HUMAN	PA2G4	proliferation-associated 2G4	Nucleus	transcription regulator
PABP1_HUMAN	PABPC1	poly(A) binding protein, cytoplasmic 1	Cytoplasm	translation regulator
PABP4_HUMAN	PABPC4	poly(A) binding protein, cytoplasmic 4 (inducible form)	Cytoplasm	translation regulator
PACS1_HUMAN	PACS1	phosphofurin acidic cluster sorting protein 1	Cytoplasm	other
PACN1_HUMAN	PACSIN1	protein kinase C and casein kinase substrate in neurons 1	Cytoplasm	kinase
PACN2_HUMAN	PACSIN2	protein kinase C and casein kinase substrate in neurons 2	Cytoplasm	transporter
PUR6_HUMAN	PAICS	phosphoribosylaminoimidazole carboxylase; phosphoribosylaminoimidazolesuccinocarboxamide synthase	Cytoplasm	enzyme
PALD_HUMAN	PALD1	phosphatase domain containing, paladin 1	Cytoplasm	phosphatase
PAN2_HUMAN	PAN2	PAN2 poly(A) specific ribonuclease subunit	Cytoplasm	peptidase
PANK4_HUMAN	PANK4	pantothenate kinase 4	Cytoplasm	kinase
PAPOG_HUMAN	PAPOLG	poly(A) polymerase gamma	Nucleus	enzyme
PARN_HUMAN	PARN	poly(A)-specific ribonuclease	Nucleus	enzyme
PARP4_HUMAN	PARP4	poly(ADP-ribose) polymerase family member 4	Cytoplasm	enzyme
TOPK_HUMAN	PBK	PDZ binding kinase	Cytoplasm	kinase
PCBP1_HUMAN	PCBP1	poly(rC) binding protein 1	Nucleus	translation regulator
PCBP2_HUMAN	PCBP2	poly(rC) binding protein 2	Nucleus	other
PCDG7_HUMAN	PCDHGA7	protocadherin gamma subfamily A, 7	Other	other
PIMT_HUMAN	PCMT1	protein-L-isoaspartate (D-aspartate) O-methyltransferase	Cytoplasm	enzyme
PCNA_HUMAN	PCNA	proliferating cell nuclear antigen	Nucleus	enzyme
PCNT_HUMAN	PCNT	pericentrin	Cytoplasm	other
PCY1B_HUMAN	PCYT1B	phosphate cytidylyltransferase 1, choline, beta	Cytoplasm	enzyme
PDC10_HUMAN	PDCD10	programmed cell death 10	Cytoplasm	other
RRP5_HUMAN	PDCD11	programmed cell death 11	Nucleus	other
PDD2L_HUMAN	PDCD2L	programmed cell death 2-like	Other	other
PDCD4_HUMAN	PDCD4	programmed cell death 4 (neoplastic transformation inhibitor)	Nucleus	other
PDCD5_HUMAN	PDCD5	programmed cell death 5	Nucleus	other
PDCD6_HUMAN	PDCD6	programmed cell death 6	Cytoplasm	other
PDC6I_HUMAN	PDCD6IP	programmed cell death 6 interacting protein	Cytoplasm	other
PHLP_HUMAN	PDCL	phosducin like	Cytoplasm	enzyme
PDCL3_HUMAN	PDCL3	phosducin like 3	Cytoplasm	other
PDDC1_HUMAN	PDDC1	Parkinson disease 7 domain containing 1	Cytoplasm	other
PDE12_HUMAN	PDE12	phosphodiesterase 12	Cytoplasm	other
ODPB_HUMAN	PDHB	pyruvate dehydrogenase (lipoamide) beta	Cytoplasm	enzyme
PDIA4_HUMAN	PDIA4	protein disulfide isomerase family A member 4	Cytoplasm	enzyme
PDIA6_HUMAN	PDIA6	protein disulfide isomerase family A member 6	Cytoplasm	enzyme
PDP1_HUMAN	PDP1	pyruvate dehyrogenase phosphatase catalytic subunit 1	Cytoplasm	phosphatase
PDS5A_HUMAN	PDS5A	PDS5 cohesin associated factor A	Nucleus	other
PDXK_HUMAN	PDXK	pyridoxal (pyridoxine, vitamin B6) kinase	Cytoplasm	kinase
PEBP1_HUMAN	PEBP1	phosphatidylethanolamine binding protein 1	Cytoplasm	other
PEF1_HUMAN	PEF1	penta-EF-hand domain containing 1	Cytoplasm	other
PELO_HUMAN	PELO	pelota homolog (Drosophila)	Nucleus	other
PEX19_HUMAN	PEX19	peroxisomal biogenesis factor 19	Cytoplasm	other
PEX5_HUMAN	PEX5	peroxisomal biogenesis factor 5	Cytoplasm	transmembrane receptor
PUR4_HUMAN	PFAS	phosphoribosylformylglycinamidine synthase	Cytoplasm	enzyme
PFD2_HUMAN	PFDN2	prefoldin subunit 2	Cytoplasm	other
PFD4_HUMAN	PFDN4	prefoldin subunit 4	Cytoplasm	other
PROF1_HUMAN	PFN1	profilin 1	Cytoplasm	other
PGAM5_HUMAN	PGAM5	PGAM family member 5, serine/threonine protein phosphatase, mitochondrial	Cytoplasm	enzyme
PHAX_HUMAN	PHAX	phosphorylated adaptor for RNA export	Cytoplasm	other
PHF12_HUMAN	PHF12	PHD finger protein 12	Nucleus	transcription regulator
PHF23_HUMAN	PHF23	PHD finger protein 23	Other	other
PI4KA_HUMAN	PI4KA	phosphatidylinositol 4-kinase, catalytic, alpha	Cytoplasm	kinase
PIHD1_HUMAN	PIH1D1	PIH1 domain containing 1	Nucleus	other
BCAP_HUMAN	PIK3AP1	phosphoinositide-3-kinase adaptor protein 1	Cytoplasm	other
P3C2B_HUMAN	PIK3C2B	phosphatidylinositol-4-phosphate 3-kinase catalytic subunit type 2 beta	Cytoplasm	kinase
PK3C3_HUMAN	PIK3C3	phosphatidylinositol 3-kinase catalytic subunit type 3	Cytoplasm	kinase
PK3CB_HUMAN	PIK3CB	phosphatidylinositol-4,5-bisphosphate 3-kinase catalytic subunit beta	Cytoplasm	kinase	SF 1126, PX-866, dactolisib, pictilisib, buparlisib, XL147, SAR260301, GSK2636771, BAY1082439, PQR309, acalisib
PK3CD_HUMAN	PIK3CD	phosphatidylinositol-4,5-bisphosphate 3-kinase catalytic subunit delta	Cytoplasm	kinase	SF 1126, PX-866, dactolisib, pictilisib, buparlisib, XL147, idelalisib, idelalisib/rituximab, PQR309, AMG-319, INCB050465, RP6530, INCB040093, acalisib
PK3CG_HUMAN	PIK3CG	phosphatidylinositol-4,5-bisphosphate 3-kinase catalytic subunit gamma	Cytoplasm	kinase	SF 1126, PX-866, PI3Kg inhibitor, dactolisib, pictilisib, buparlisib, XL147, PQR309, RP6530
P85A_HUMAN	PIK3R1	phosphoinositide-3-kinase regulatory subunit 1	Cytoplasm	kinase
PI3R4_HUMAN	PIK3R4	phosphoinositide-3-kinase regulatory subunit 4	Cytoplasm	kinase
KPYM_HUMAN	PKM	pyruvate kinase, muscle	Cytoplasm	kinase	CAP-232
PLAP_HUMAN	PLAA	phospholipase A2-activating protein	Cytoplasm	other
PLCG1_HUMAN	PLCG1	phospholipase C gamma 1	Cytoplasm	enzyme
PLCG2_HUMAN	PLCG2	phospholipase C gamma 2	Cytoplasm	enzyme
PLCH1_HUMAN	PLCH1	phospholipase C eta 1	Cytoplasm	enzyme
PLCL2_HUMAN	PLCL2	phospholipase C like 2	Cytoplasm	enzyme
PKH4B_HUMAN	PLEKHG4B	pleckstrin homology and RhoGEF domain containing G4B	Other	other
PKHH2_HUMAN	PLEKHH2	pleckstrin homology, MyTH4 and FERM domain containing H2	Cytoplasm	other
PLIN3_HUMAN	PLIN3	perilipin 3	Cytoplasm	other
PLP2_HUMAN	PLP2	proteolipid protein 2 (colonic epithelium-enriched)	Cytoplasm	transporter
PLXD1_HUMAN	PLXND1	plexin D1	Plasma Membrane	transmembrane receptor
P20D2_HUMAN	PM20D2	peptidase M20 domain containing 2	Nucleus	other
PMF1_HUMAN	PMF1/PMF1-BGLAP	polyamine-modulated factor 1	Nucleus	transcription regulator
PML_HUMAN	PML	promyelocytic leukemia	Nucleus	transcription regulator	arsenic trioxide
MPPB_HUMAN	PMPCB	peptidase (mitochondrial processing) beta	Cytoplasm	peptidase
PMS1_HUMAN	PMS1	PMS1 homolog 1, mismatch repair system component	Nucleus	enzyme
PMS2_HUMAN	PMS2	PMS1 homolog 2, mismatch repair system component	Nucleus	enzyme
PNISR_HUMAN	PNISR	PNN-interacting serine/arginine-rich protein	Nucleus	other
DPOLA_HUMAN	POLA1	polymerase (DNA directed), alpha 1, catalytic subunit	Nucleus	enzyme	nelarabine, MB07133, cytarabine/fludarabine phosphate, cytarabine/daunorubicin, bortezomib/cladribine/rituximab, cyclophosphamide/fludarabine phosphate/rituximab, cladribine/cytarabine/daunorubicin, cytarabine/etoposide, cytarabine/etoposide/mitoxantrone, cytarabine/dexamethasone, cytarabine/mitoxantrone, cyclophosphamide/cytarabine/6-mercaptopurine, cladribine/cytarabine/filgrastim, clofarabine/…
DPOA2_HUMAN	POLA2	polymerase (DNA directed), alpha 2, accessory subunit	Nucleus	enzyme
DPOD1_HUMAN	POLD1	polymerase (DNA directed), delta 1, catalytic subunit	Nucleus	enzyme	nelarabine, MB07133, cytarabine/fludarabine phosphate, cytarabine/daunorubicin, cladribine/cytarabine/daunorubicin, cytarabine/etoposide, cytarabine/etoposide/mitoxantrone, cytarabine/dexamethasone, cytarabine/mitoxantrone, cyclophosphamide/cytarabine/6-mercaptopurine, cladribine/cytarabine/filgrastim, clofarabine/cyclophosphamide/etoposide, cytarabine/filgrastim/fludarabine phosphate, cladribine…
DPOD2_HUMAN	POLD2	polymerase (DNA directed), delta 2, accessory subunit	Nucleus	enzyme
DPOD3_HUMAN	POLD3	polymerase (DNA-directed), delta 3, accessory subunit	Nucleus	transcription regulator
DPOE1_HUMAN	POLE	polymerase (DNA directed), epsilon, catalytic subunit	Nucleus	enzyme	nelarabine, bortezomib/cladribine/rituximab, gemcitabine/paclitaxel, cladribine/cytarabine/daunorubicin, gemcitabine/oxaliplatin, gemcitabine/vinorelbine, docetaxel/gemcitabine, docetaxel/gemcitabine/vincristine, cladribine/cytarabine/filgrastim, clofarabine/cyclophosphamide/etoposide, capecitabine/gemcitabine, gemcitabine/oxaliplatin/paclitaxel, cladribine/cytarabine/filgrastim/mitoxantrone, clo…
DPOE3_HUMAN	POLE3	polymerase (DNA directed), epsilon 3, accessory subunit	Nucleus	enzyme	bortezomib/cladribine/rituximab, gemcitabine/paclitaxel, cladribine/cytarabine/daunorubicin, gemcitabine/oxaliplatin, gemcitabine/vinorelbine, docetaxel/gemcitabine, docetaxel/gemcitabine/vincristine, cladribine/cytarabine/filgrastim, capecitabine/gemcitabine, gemcitabine/oxaliplatin/paclitaxel, cladribine/cytarabine/filgrastim/mitoxantrone, cladribine/rituximab, capecitabine/docetaxel/gemcitabin…
RPA1_HUMAN	POLR1A	polymerase (RNA) I polypeptide A	Nucleus	enzyme
RPA2_HUMAN	POLR1B	polymerase (RNA) I polypeptide B	Nucleus	enzyme
RPAC1_HUMAN	POLR1C	polymerase (RNA) I polypeptide C	Nucleus	enzyme
RPB1_HUMAN	POLR2A	polymerase (RNA) II (DNA directed) polypeptide A, 220kDa	Nucleus	enzyme
RPB2_HUMAN	POLR2B	polymerase (RNA) II (DNA directed) polypeptide B, 140kDa	Nucleus	enzyme
RPB3_HUMAN	POLR2C	polymerase (RNA) II (DNA directed) polypeptide C, 33kDa	Nucleus	enzyme
RPB4_HUMAN	POLR2D	polymerase (RNA) II (DNA directed) polypeptide D	Nucleus	enzyme
RPAB1_HUMAN	POLR2E	polymerase (RNA) II (DNA directed) polypeptide E, 25kDa	Nucleus	enzyme
RPB7_HUMAN	POLR2G	polymerase (RNA) II (DNA directed) polypeptide G	Nucleus	enzyme
RPAB3_HUMAN	POLR2H	polymerase (RNA) II (DNA directed) polypeptide H	Nucleus	enzyme
RPB9_HUMAN	POLR2I	polymerase (RNA) II (DNA directed) polypeptide I, 14.5kDa	Nucleus	transcription regulator
RPC2_HUMAN	POLR3B	polymerase (RNA) III (DNA directed) polypeptide B	Nucleus	enzyme
RPC3_HUMAN	POLR3C	polymerase (RNA) III (DNA directed) polypeptide C (62kD)	Nucleus	enzyme
RPC4_HUMAN	POLR3D	polymerase (RNA) III (DNA directed) polypeptide D, 44kDa	Nucleus	transcription regulator
RPC7_HUMAN	POLR3G	polymerase (RNA) III (DNA directed) polypeptide G (32kD)	Nucleus	enzyme
POP1_HUMAN	POP1	POP1 homolog, ribonuclease P/MRP subunit	Nucleus	enzyme
POP7_HUMAN	POP7	POP7 homolog, ribonuclease P/MRP subunit	Nucleus	enzyme
POTEE_HUMAN	POTEE/POTEF	POTE ankyrin domain family member F	Extracellular Space	other
IPYR_HUMAN	PPA1	pyrophosphatase (inorganic) 1	Cytoplasm	enzyme
PUR1_HUMAN	PPAT	phosphoribosyl pyrophosphate amidotransferase	Cytoplasm	enzyme	6-mercaptopurine, thioguanine, azathioprine, cyclophosphamide/cytarabine/6-mercaptopurine, amidophosphoribosyltransferase inhibitor
COAC_HUMAN	PPCDC	phosphopantothenoylcysteine decarboxylase	Cytoplasm	enzyme
PPIA_HUMAN	PPIA	peptidylprolyl isomerase A	Cytoplasm	enzyme	N-methyl-4-Ile-cyclosporin
PPIB_HUMAN	PPIB	peptidylprolyl isomerase B	Cytoplasm	enzyme
PPIE_HUMAN	PPIE	peptidylprolyl isomerase E	Nucleus	enzyme
PPIH_HUMAN	PPIH	peptidylprolyl isomerase H	Nucleus	enzyme
PPIL2_HUMAN	PPIL2	peptidylprolyl isomerase like 2	Nucleus	enzyme
PPIL4_HUMAN	PPIL4	peptidylprolyl isomerase like 4	Nucleus	enzyme
VIP2_HUMAN	PPIP5K2	diphosphoinositol pentakisphosphate kinase 2	Cytoplasm	kinase
PPM1A_HUMAN	PPM1A	protein phosphatase, Mg2+/Mn2+ dependent 1A	Cytoplasm	phosphatase
PPM1B_HUMAN	PPM1B	protein phosphatase, Mg2+/Mn2+ dependent 1B	Cytoplasm	phosphatase
PPM1E_HUMAN	PPM1E	protein phosphatase, Mg2+/Mn2+ dependent 1E	Nucleus	phosphatase
PPM1G_HUMAN	PPM1G	protein phosphatase, Mg2+/Mn2+ dependent 1G	Nucleus	phosphatase
PP1A_HUMAN	PPP1CA	protein phosphatase 1, catalytic subunit, alpha isozyme	Cytoplasm	phosphatase
PP1B_HUMAN	PPP1CB	protein phosphatase 1, catalytic subunit, beta isozyme	Cytoplasm	phosphatase
PP2AA_HUMAN	PPP2CA	protein phosphatase 2, catalytic subunit, alpha isozyme	Cytoplasm	phosphatase
2AAA_HUMAN	PPP2R1A	protein phosphatase 2 regulatory subunit A, alpha	Cytoplasm	phosphatase
2AAB_HUMAN	PPP2R1B	protein phosphatase 2 regulatory subunit A, beta	Plasma Membrane	phosphatase
2ABA_HUMAN	PPP2R2A	protein phosphatase 2 regulatory subunit B, alpha	Cytoplasm	phosphatase
2ABD_HUMAN	PPP2R2D	protein phosphatase 2 regulatory subunit B, delta	Nucleus	phosphatase
2A5G_HUMAN	PPP2R5C	protein phosphatase 2 regulatory subunit B', gamma	Nucleus	other
2A5E_HUMAN	PPP2R5E	protein phosphatase 2 regulatory subunit B', epsilon	Cytoplasm	phosphatase
PP2BA_HUMAN	PPP3CA	protein phosphatase 3, catalytic subunit, alpha isozyme	Cytoplasm	phosphatase	voclosporin, tacrolimus, pimecrolimus, cyclosporin A
PP2BB_HUMAN	PPP3CB	protein phosphatase 3, catalytic subunit, beta isozyme	Plasma Membrane	phosphatase	voclosporin, tacrolimus, pimecrolimus, cyclosporin A
CANB1_HUMAN	PPP3R1	protein phosphatase 3 regulatory subunit B, alpha	Cytoplasm	phosphatase	cyclosporin A
PP4C_HUMAN	PPP4C	protein phosphatase 4 catalytic subunit	Cytoplasm	phosphatase
PP4R1_HUMAN	PPP4R1	protein phosphatase 4 regulatory subunit 1	Other	phosphatase
PP4R2_HUMAN	PPP4R2	protein phosphatase 4 regulatory subunit 2	Cytoplasm	other
P4R3A_HUMAN	PPP4R3A	protein phosphatase 4 regulatory subunit 3A	Plasma Membrane	other
P4R3B_HUMAN	PPP4R3B	protein phosphatase 4 regulatory subunit 3B	Nucleus	other
PPP5_HUMAN	PPP5C	protein phosphatase 5, catalytic subunit	Nucleus	phosphatase
PPP6_HUMAN	PPP6C	protein phosphatase 6, catalytic subunit	Nucleus	phosphatase
PP6R1_HUMAN	PPP6R1	protein phosphatase 6 regulatory subunit 1	Cytoplasm	other
PP6R2_HUMAN	PPP6R2	protein phosphatase 6 regulatory subunit 2	Cytoplasm	other
PP6R3_HUMAN	PPP6R3	protein phosphatase 6 regulatory subunit 3	Cytoplasm	other
PPT1_HUMAN	PPT1	palmitoyl-protein thioesterase 1	Cytoplasm	enzyme
PRCC_HUMAN	PRCC	papillary renal cell carcinoma (translocation-associated)	Nucleus	other
PRDX1_HUMAN	PRDX1	peroxiredoxin 1	Cytoplasm	enzyme
PRDX2_HUMAN	PRDX2	peroxiredoxin 2	Cytoplasm	enzyme
PRDX3_HUMAN	PRDX3	peroxiredoxin 3	Cytoplasm	enzyme
PRDX4_HUMAN	PRDX4	peroxiredoxin 4	Cytoplasm	enzyme
PRDX6_HUMAN	PRDX6	peroxiredoxin 6	Cytoplasm	enzyme
PRI1_HUMAN	PRIM1	primase, DNA, polypeptide 1 (49kDa)	Nucleus	enzyme	cytarabine/fludarabine phosphate, cyclophosphamide/fludarabine phosphate/rituximab, cytarabine/filgrastim/fludarabine phosphate, fludarabine phosphate/rituximab, dexamethasone/fludarabine phosphate/mitoxantrone, alemtuzumab/cyclophosphamide/fludarabine phosphate/rituximab, alemtuzumab/fludarabine phosphate, cytarabine/fludarabine phosphate/oxaliplatin/rituximab, cyclophosphamide/fludarabine phosp…
PRI2_HUMAN	PRIM2	primase, DNA, polypeptide 2 (58kDa)	Nucleus	enzyme	cytarabine/fludarabine phosphate, cyclophosphamide/fludarabine phosphate/rituximab, cytarabine/filgrastim/fludarabine phosphate, fludarabine phosphate/rituximab, dexamethasone/fludarabine phosphate/mitoxantrone, alemtuzumab/cyclophosphamide/fludarabine phosphate/rituximab, alemtuzumab/fludarabine phosphate, cytarabine/fludarabine phosphate/oxaliplatin/rituximab, cyclophosphamide/fludarabine phosp…
AAPK1_HUMAN	PRKAA1	protein kinase, AMP-activated, alpha 1 catalytic subunit	Cytoplasm	kinase	phenformin
AAKG1_HUMAN	PRKAG1	protein kinase, AMP-activated, gamma 1 non-catalytic subunit	Nucleus	kinase
KAP0_HUMAN	PRKAR1A	protein kinase, cAMP-dependent, regulatory subunit type I alpha	Cytoplasm	kinase
KAP2_HUMAN	PRKAR2A	protein kinase, cAMP-dependent, regulatory subunit type II alpha	Cytoplasm	kinase
KAP3_HUMAN	PRKAR2B	protein kinase, cAMP-dependent, regulatory subunit type II beta	Cytoplasm	kinase
KPCI_HUMAN	PRKCI	protein kinase C, iota	Cytoplasm	kinase	ingenol mebutate
GLU2B_HUMAN	PRKCSH	protein kinase C substrate 80K-H	Cytoplasm	enzyme
KPCD2_HUMAN	PRKD2	protein kinase D2	Cytoplasm	kinase
PRKDC_HUMAN	PRKDC	protein kinase, DNA-activated, catalytic polypeptide	Nucleus	kinase	P7170, CC-115, MSC2490484A
PKRI1_HUMAN	PRKRIP1	PRKR interacting protein 1 (IL11 inducible)	Nucleus	other
ANM1_HUMAN	PRMT1	protein arginine methyltransferase 1	Nucleus	enzyme
ANM3_HUMAN	PRMT3	protein arginine methyltransferase 3	Nucleus	enzyme
ANM5_HUMAN	PRMT5	protein arginine methyltransferase 5	Cytoplasm	enzyme
ANM6_HUMAN	PRMT6	protein arginine methyltransferase 6	Nucleus	enzyme
ANM7_HUMAN	PRMT7	protein arginine methyltransferase 7	Cytoplasm	enzyme
PROSC_HUMAN	PROSC	proline synthetase co-transcribed homolog (bacterial)	Cytoplasm	enzyme
PRP19_HUMAN	PRPF19	pre-mRNA processing factor 19	Nucleus	enzyme
PRPF3_HUMAN	PRPF3	pre-mRNA processing factor 3	Nucleus	other
PRP39_HUMAN	PRPF39	pre-mRNA processing factor 39	Nucleus	other
PRP4_HUMAN	PRPF4	pre-mRNA processing factor 4	Nucleus	other
PRP8_HUMAN	PRPF8	pre-mRNA processing factor 8	Nucleus	other
PRPS1_HUMAN	PRPS1	phosphoribosyl pyrophosphate synthetase 1	Cytoplasm	kinase
PRPS2_HUMAN	PRPS2	phosphoribosyl pyrophosphate synthetase 2	Cytoplasm	kinase
KPRB_HUMAN	PRPSAP2	phosphoribosyl pyrophosphate synthetase-associated protein 2	Other	other
PRC2A_HUMAN	PRRC2A	proline-rich coiled-coil 2A	Cytoplasm	other
PRC2C_HUMAN	PRRC2C	proline-rich coiled-coil 2C	Other	other
PRAX_HUMAN	PRX	periaxin	Nucleus	other
SERC_HUMAN	PSAT1	phosphoserine aminotransferase 1	Cytoplasm	enzyme
PSD4_HUMAN	PSD4	pleckstrin and Sec7 domain containing 4	Cytoplasm	other
PSA1_HUMAN	PSMA1	proteasome subunit alpha 1	Cytoplasm	peptidase
PSA2_HUMAN	PSMA2	proteasome subunit alpha 2	Cytoplasm	peptidase
PSA3_HUMAN	PSMA3	proteasome subunit alpha 3	Cytoplasm	peptidase
PSA4_HUMAN	PSMA4	proteasome subunit alpha 4	Cytoplasm	peptidase
PSA5_HUMAN	PSMA5	proteasome subunit alpha 5	Cytoplasm	peptidase
PSA6_HUMAN	PSMA6	proteasome subunit alpha 6	Cytoplasm	peptidase
PSA7_HUMAN	PSMA7	proteasome subunit alpha 7	Cytoplasm	peptidase
PSB1_HUMAN	PSMB1	proteasome subunit beta 1	Cytoplasm	peptidase	carfilzomib, bortezomib/cladribine/rituximab, bortezomib/sorafenib, bortezomib/paclitaxel, bortezomib/dexamethasone, bortezomib/dexamethasone/doxorubicin, bortezomib/dexamethasone/lenalidomide, bortezomib/dexamethasone/thalidomide, carfilzomib/dexamethasone/lenalidomide, bortezomib/prednisone, bortezomib/doxorubicin, bortezomib/vorinostat, bortezomib/thalidomide, bortezomib/rituximab, bortezomib/…
PSB10_HUMAN	PSMB10	proteasome subunit beta 10	Cytoplasm	peptidase	carfilzomib, carfilzomib/dexamethasone/lenalidomide, carfilzomib/dexamethasone/rituximab
PSB2_HUMAN	PSMB2	proteasome subunit beta 2	Cytoplasm	peptidase	carfilzomib, bortezomib/cladribine/rituximab, bortezomib/sorafenib, bortezomib/paclitaxel, bortezomib/dexamethasone, bortezomib/dexamethasone/doxorubicin, bortezomib/dexamethasone/lenalidomide, bortezomib/dexamethasone/thalidomide, carfilzomib/dexamethasone/lenalidomide, bortezomib/prednisone, bortezomib/doxorubicin, bortezomib/vorinostat, bortezomib/thalidomide, bortezomib/rituximab, bortezomib/…
PSB3_HUMAN	PSMB3	proteasome subunit beta 3	Cytoplasm	peptidase
PSB4_HUMAN	PSMB4	proteasome subunit beta 4	Cytoplasm	peptidase
PSB5_HUMAN	PSMB5	proteasome subunit beta 5	Cytoplasm	peptidase	carfilzomib, bortezomib/cladribine/rituximab, ixazomib citrate, bortezomib/sorafenib, bortezomib/paclitaxel, bortezomib/melphalan, bortezomib/dexamethasone, bortezomib/dexamethasone/doxorubicin, bortezomib/dexamethasone/lenalidomide, bortezomib/dexamethasone/thalidomide, carfilzomib/dexamethasone/lenalidomide, bortezomib/prednisone, bortezomib/doxorubicin, bortezomib/vorinostat, bortezomib/thalid…
PSB6_HUMAN	PSMB6	proteasome subunit beta 6	Nucleus	peptidase
PSB7_HUMAN	PSMB7	proteasome subunit beta 7	Cytoplasm	peptidase
PSB8_HUMAN	PSMB8	proteasome subunit beta 8	Cytoplasm	peptidase	carfilzomib, carfilzomib/dexamethasone/lenalidomide, carfilzomib/dexamethasone/rituximab
PSB9_HUMAN	PSMB9	proteasome subunit beta 9	Cytoplasm	peptidase	carfilzomib, carfilzomib/dexamethasone/lenalidomide, carfilzomib/dexamethasone/rituximab
PRS4_HUMAN	PSMC1	proteasome 26S subunit, ATPase 1	Nucleus	peptidase
PRS7_HUMAN	PSMC2	proteasome 26S subunit, ATPase 2	Nucleus	peptidase
PRS6A_HUMAN	PSMC3	proteasome 26S subunit, ATPase 3	Nucleus	transcription regulator
PRS6B_HUMAN	PSMC4	proteasome 26S subunit, ATPase 4	Nucleus	peptidase
PRS8_HUMAN	PSMC5	proteasome 26S subunit, ATPase 5	Nucleus	transcription regulator
PRS10_HUMAN	PSMC6	proteasome 26S subunit, ATPase 6	Nucleus	peptidase
PSMD1_HUMAN	PSMD1	proteasome 26S subunit, non-ATPase 1	Cytoplasm	other	bortezomib/cladribine/rituximab, bortezomib/sorafenib, bortezomib/paclitaxel, bortezomib/dexamethasone, bortezomib/dexamethasone/doxorubicin, bortezomib/dexamethasone/lenalidomide, bortezomib/dexamethasone/thalidomide, bortezomib/prednisone, bortezomib/doxorubicin, bortezomib/vorinostat, bortezomib/thalidomide, bortezomib/rituximab, bortezomib/dexamethasone/rituximab, bortezomib
PSD10_HUMAN	PSMD10	proteasome 26S subunit, non-ATPase 10	Cytoplasm	transcription regulator
PSD11_HUMAN	PSMD11	proteasome 26S subunit, non-ATPase 11	Cytoplasm	other
PSD12_HUMAN	PSMD12	proteasome 26S subunit, non-ATPase 12	Cytoplasm	other
PSD13_HUMAN	PSMD13	proteasome 26S subunit, non-ATPase 13	Cytoplasm	peptidase
PSDE_HUMAN	PSMD14	proteasome 26S subunit, non-ATPase 14	Cytoplasm	peptidase
PSMD2_HUMAN	PSMD2	proteasome 26S subunit, non-ATPase 2	Cytoplasm	other	bortezomib/cladribine/rituximab, bortezomib/sorafenib, bortezomib/paclitaxel, bortezomib/dexamethasone, bortezomib/dexamethasone/doxorubicin, bortezomib/dexamethasone/lenalidomide, bortezomib/dexamethasone/thalidomide, bortezomib/prednisone, bortezomib/doxorubicin, bortezomib/vorinostat, bortezomib/thalidomide, bortezomib/rituximab, bortezomib/dexamethasone/rituximab, bortezomib
PSMD3_HUMAN	PSMD3	proteasome 26S subunit, non-ATPase 3	Cytoplasm	other
PSMD4_HUMAN	PSMD4	proteasome 26S subunit, non-ATPase 4	Cytoplasm	other
PSMD5_HUMAN	PSMD5	proteasome 26S subunit, non-ATPase 5	Other	other
PSMD6_HUMAN	PSMD6	proteasome 26S subunit, non-ATPase 6	Cytoplasm	enzyme
PSMD8_HUMAN	PSMD8	proteasome 26S subunit, non-ATPase 8	Cytoplasm	other
PSMD9_HUMAN	PSMD9	proteasome 26S subunit, non-ATPase 9	Cytoplasm	transcription regulator
PSME1_HUMAN	PSME1	proteasome activator subunit 1	Cytoplasm	other
PSME2_HUMAN	PSME2	proteasome activator subunit 2	Cytoplasm	peptidase
PSME3_HUMAN	PSME3	proteasome activator subunit 3	Cytoplasm	peptidase
PSME4_HUMAN	PSME4	proteasome activator subunit 4	Cytoplasm	other
PSMG1_HUMAN	PSMG1	proteasome (prosome, macropain) assembly chaperone 1	Plasma Membrane	other
PSMG2_HUMAN	PSMG2	proteasome (prosome, macropain) assembly chaperone 2	Nucleus	other
PSPC1_HUMAN	PSPC1	paraspeckle component 1	Nucleus	other
PTAR1_HUMAN	PTAR1	protein prenyltransferase alpha subunit repeat containing 1	Other	other
PTBP1_HUMAN	PTBP1	polypyrimidine tract binding protein 1	Nucleus	enzyme
PTCD3_HUMAN	PTCD3	pentatricopeptide repeat domain 3	Cytoplasm	other
PGES2_HUMAN	PTGES2	prostaglandin E synthase 2	Cytoplasm	transcription regulator
FAK1_HUMAN	PTK2	protein tyrosine kinase 2	Cytoplasm	kinase
FAK2_HUMAN	PTK2B	protein tyrosine kinase 2 beta	Cytoplasm	kinase
PTPRC_HUMAN	PTPRC	protein tyrosine phosphatase, receptor type C	Plasma Membrane	phosphatase	111 In-BC8
PTPRE_HUMAN	PTPRE	protein tyrosine phosphatase, receptor type E	Plasma Membrane	phosphatase
PTPRQ_HUMAN	PTPRQ	protein tyrosine phosphatase, receptor type Q	Other	other
K0020_HUMAN	PUM3	pumilio RNA binding family member 3	Nucleus	other
P5CR1_HUMAN	PYCR1	pyrroline-5-carboxylate reductase 1	Cytoplasm	enzyme
P5CR3_HUMAN	PYCRL	pyrroline-5-carboxylate reductase-like	Cytoplasm	enzyme
PYGB_HUMAN	PYGB	phosphorylase, glycogen; brain	Cytoplasm	enzyme
SYQ_HUMAN	QARS	glutaminyl-tRNA synthetase	Cytoplasm	enzyme
GATA_HUMAN	QRSL1	glutaminyl-tRNA synthase (glutamine-hydrolyzing)-like 1	Cytoplasm	enzyme
QTRD1_HUMAN	QTRTD1	queuine tRNA-ribosyltransferase domain containing 1	Cytoplasm	other
RAB10_HUMAN	RAB10	RAB10, member RAS oncogene family	Cytoplasm	enzyme
RB11A_HUMAN	RAB11A	RAB11A, member RAS oncogene family	Cytoplasm	enzyme
RFIP1_HUMAN	RAB11FIP1	RAB11 family interacting protein 1 (class I)	Cytoplasm	other
RAB14_HUMAN	RAB14	RAB14, member RAS oncogene family	Cytoplasm	enzyme
RAB1A_HUMAN	RAB1A	RAB1A, member RAS oncogene family	Cytoplasm	enzyme
RAB21_HUMAN	RAB21	RAB21, member RAS oncogene family	Cytoplasm	enzyme
RAB23_HUMAN	RAB23	RAB23, member RAS oncogene family	Cytoplasm	enzyme
RAB2A_HUMAN	RAB2A	RAB2A, member RAS oncogene family	Cytoplasm	enzyme
RAB30_HUMAN	RAB30	RAB30, member RAS oncogene family	Cytoplasm	enzyme
RB3GP_HUMAN	RAB3GAP1	RAB3 GTPase activating protein catalytic subunit 1	Cytoplasm	other
RBGPR_HUMAN	RAB3GAP2	RAB3 GTPase activating non-catalytic protein subunit 2	Cytoplasm	enzyme
RB40C_HUMAN	RAB40C	RAB40C, member RAS oncogene family	Plasma Membrane	enzyme
RAB5C_HUMAN	RAB5C	RAB5C, member RAS oncogene family	Cytoplasm	enzyme
RAB6A_HUMAN	RAB6A	RAB6A, member RAS oncogene family	Cytoplasm	enzyme
RAB7A_HUMAN	RAB7A	RAB7A, member RAS oncogene family	Cytoplasm	enzyme
RABE1_HUMAN	RABEP1	rabaptin, RAB GTPase binding effector protein 1	Cytoplasm	transporter
RABEK_HUMAN	RABEPK	Rab9 effector protein with kelch motifs	Cytoplasm	other
RBGP1_HUMAN	RABGAP1	RAB GTPase activating protein 1	Cytoplasm	other
RBG1L_HUMAN	RABGAP1L	RAB GTPase activating protein 1-like	Cytoplasm	other
PGTB2_HUMAN	RABGGTB	Rab geranylgeranyltransferase, beta subunit	Cytoplasm	enzyme
RAC2_HUMAN	RAC2	ras-related C3 botulinum toxin substrate 2 (rho family, small GTP binding protein Rac2)	Cytoplasm	enzyme
RAD17_HUMAN	RAD17	RAD17 checkpoint clamp loader component	Nucleus	enzyme
RD23A_HUMAN	RAD23A	RAD23 homolog A, nucleotide excision repair protein	Nucleus	other
RD23B_HUMAN	RAD23B	RAD23 homolog B, nucleotide excision repair protein	Nucleus	other
RAD50_HUMAN	RAD50	RAD50 homolog, double strand break repair protein	Nucleus	enzyme
RA51D_HUMAN	RAD51D	RAD51 paralog D	Nucleus	enzyme
RAE1L_HUMAN	RAE1	ribonucleic acid export 1	Nucleus	other
RALA_HUMAN	RALA	v-ral simian leukemia viral oncogene homolog A (ras related)	Cytoplasm	enzyme
RAN_HUMAN	RAN	RAN, member RAS oncogene family	Nucleus	enzyme
RBP2_HUMAN	RANBP2	RAN binding protein 2	Nucleus	enzyme
RNBP6_HUMAN	RANBP6	RAN binding protein 6	Cytoplasm	other
RAGP1_HUMAN	RANGAP1	Ran GTPase activating protein 1	Nucleus	other
RAP1A_HUMAN	RAP1A	RAP1A, member of RAS oncogene family	Cytoplasm	enzyme
RAP2C_HUMAN	RAP2C	RAP2C, member of RAS oncogene family	Cytoplasm	enzyme
RPGF6_HUMAN	RAPGEF6	Rap guanine nucleotide exchange factor 6	Plasma Membrane	other
SYRC_HUMAN	RARS	arginyl-tRNA synthetase	Cytoplasm	enzyme
GRP2_HUMAN	RASGRP2	RAS guanyl releasing protein 2 (calcium and DAG-regulated)	Cytoplasm	other
RASF6_HUMAN	RASSF6	Ras association (RalGDS/AF-6) domain family member 6	Other	other
RBBP4_HUMAN	RBBP4	retinoblastoma binding protein 4	Nucleus	enzyme
RBBP7_HUMAN	RBBP7	retinoblastoma binding protein 7	Nucleus	transcription regulator
HOIL1_HUMAN	RBCK1	RanBP-type and C3HC4-type zinc finger containing 1	Cytoplasm	transcription regulator
RBM10_HUMAN	RBM10	RNA binding motif protein 10	Nucleus	other
RB12B_HUMAN	RBM12B	RNA binding motif protein 12B	Other	other
RBM14_HUMAN	RBM14	RNA binding motif protein 14	Nucleus	transcription regulator
SPF45_HUMAN	RBM17	RNA binding motif protein 17	Nucleus	other
RBM25_HUMAN	RBM25	RNA binding motif protein 25	Nucleus	other
RBM26_HUMAN	RBM26	RNA binding motif protein 26	Other	other
RBM3_HUMAN	RBM3	RNA binding motif (RNP1, RRM) protein 3	Cytoplasm	other
RBM39_HUMAN	RBM39	RNA binding motif protein 39	Nucleus	transcription regulator
RBM4_HUMAN	RBM4	RNA binding motif protein 4	Nucleus	other
RBM5_HUMAN	RBM5	RNA binding motif protein 5	Nucleus	other
RBM6_HUMAN	RBM6	RNA binding motif protein 6	Nucleus	other
RBX1_HUMAN	RBX1	ring-box 1, E3 ubiquitin protein ligase	Cytoplasm	enzyme
RCC1_HUMAN	RCC1	regulator of chromosome condensation 1	Cytoplasm	other
RCCD1_HUMAN	RCCD1	RCC1 domain containing 1	Other	other
RCN2_HUMAN	RCN2	reticulocalbin 2	Cytoplasm	other
RCOR1_HUMAN	RCOR1	REST corepressor 1	Nucleus	transcription regulator
REL_HUMAN	REL	v-rel avian reticuloendotheliosis viral oncogene homolog	Nucleus	transcription regulator
REM1_HUMAN	REM1	RAS (RAD and GEM)-like GTP-binding 1	Other	enzyme
RER1_HUMAN	RER1	retention in endoplasmic reticulum sorting receptor 1	Cytoplasm	other
RFC1_HUMAN	RFC1	replication factor C subunit 1	Nucleus	transcription regulator
RFC2_HUMAN	RFC2	replication factor C subunit 2	Nucleus	other
RFC3_HUMAN	RFC3	replication factor C subunit 3	Nucleus	enzyme
RFC4_HUMAN	RFC4	replication factor C subunit 4	Nucleus	other
RFC5_HUMAN	RFC5	replication factor C subunit 5	Nucleus	enzyme
RGPD4_HUMAN	RGPD4 (includes others)	RANBP2-like and GRIP domain containing 5	Nucleus	other
RHOG_HUMAN	RHOG	ras homolog family member G	Cytoplasm	enzyme
RIC1_HUMAN	RIC1	RIC1 homolog, RAB6A GEF complex partner 1	Cytoplasm	other
RIC8A_HUMAN	RIC8A	RIC8 guanine nucleotide exchange factor A	Cytoplasm	other
RICTR_HUMAN	RICTOR	RPTOR independent companion of MTOR, complex 2	Cytoplasm	other
RIOK2_HUMAN	RIOK2	RIO kinase 2	Other	kinase
RIOK3_HUMAN	RIOK3	RIO kinase 3	Other	kinase
LR16C_HUMAN	RLTPR	RGD motif, leucine rich repeats, tropomodulin domain and proline-rich containing	Plasma Membrane	other
RN115_HUMAN	RNF115	ring finger protein 115	Cytoplasm	enzyme
RN123_HUMAN	RNF123	ring finger protein 123	Cytoplasm	other
RN126_HUMAN	RNF126	ring finger protein 126	Other	enzyme
RN138_HUMAN	RNF138	ring finger protein 138, E3 ubiquitin protein ligase	Nucleus	enzyme
BRE1A_HUMAN	RNF20	ring finger protein 20	Nucleus	enzyme
RN213_HUMAN	RNF213	ring finger protein 213	Cytoplasm	enzyme
RN219_HUMAN	RNF219	ring finger protein 219	Other	other
RNF31_HUMAN	RNF31	ring finger protein 31	Cytoplasm	enzyme
BRE1B_HUMAN	RNF40	ring finger protein 40, E3 ubiquitin protein ligase	Cytoplasm	enzyme
MCE1_HUMAN	RNGTT	RNA guanylyltransferase and 5'-phosphatase	Nucleus	phosphatase
RINI_HUMAN	RNH1	ribonuclease/angiogenin inhibitor 1	Cytoplasm	other
MCES_HUMAN	RNMT	RNA (guanine-7-) methyltransferase	Nucleus	enzyme
RFA1_HUMAN	RPA1	replication protein A1	Nucleus	other
RFA2_HUMAN	RPA2	replication protein A2	Nucleus	other
RPAP1_HUMAN	RPAP1	RNA polymerase II associated protein 1	Other	other
RPAP2_HUMAN	RPAP2	RNA polymerase II associated protein 2	Nucleus	enzyme
RPAP3_HUMAN	RPAP3	RNA polymerase II associated protein 3	Other	enzyme
RPGR1_HUMAN	RPGRIP1	retinitis pigmentosa GTPase regulator interacting protein 1	Extracellular Space	other
RPIA_HUMAN	RPIA	ribose 5-phosphate isomerase A	Cytoplasm	enzyme
RL10_HUMAN	RPL10	ribosomal protein L10	Cytoplasm	other
RL10A_HUMAN	RPL10A	ribosomal protein L10a	Nucleus	other
RL11_HUMAN	RPL11	ribosomal protein L11	Cytoplasm	other
RL12_HUMAN	RPL12	ribosomal protein L12	Nucleus	other
RL13_HUMAN	RPL13	ribosomal protein L13	Nucleus	other
RL13A_HUMAN	RPL13A	ribosomal protein L13a	Cytoplasm	other
RL14_HUMAN	RPL14	ribosomal protein L14	Cytoplasm	other
RL15_HUMAN	RPL15	ribosomal protein L15	Cytoplasm	other
RL17_HUMAN	RPL17	ribosomal protein L17	Cytoplasm	other
RL18_HUMAN	RPL18	ribosomal protein L18	Cytoplasm	other
RL19_HUMAN	RPL19	ribosomal protein L19	Cytoplasm	other
RL21_HUMAN	RPL21	ribosomal protein L21	Cytoplasm	other
RL22_HUMAN	RPL22	ribosomal protein L22	Nucleus	other
RL22L_HUMAN	RPL22L1	ribosomal protein L22 like 1	Other	other
RL23_HUMAN	RPL23	ribosomal protein L23	Cytoplasm	other
RL23A_HUMAN	RPL23A	ribosomal protein L23a	Cytoplasm	other
RL24_HUMAN	RPL24	ribosomal protein L24	Cytoplasm	other
RL26_HUMAN	RPL26	ribosomal protein L26	Cytoplasm	other
RL27_HUMAN	RPL27	ribosomal protein L27	Cytoplasm	other
RL27A_HUMAN	RPL27A	ribosomal protein L27a	Cytoplasm	other
RL28_HUMAN	RPL28	ribosomal protein L28	Cytoplasm	other
RL29_HUMAN	RPL29	ribosomal protein L29	Cytoplasm	other
RL3_HUMAN	RPL3	ribosomal protein L3	Nucleus	other	omacetaxine mepesuccinate
RL30_HUMAN	RPL30	ribosomal protein L30	Cytoplasm	other
RL31_HUMAN	RPL31	ribosomal protein L31	Cytoplasm	other
RL32_HUMAN	RPL32	ribosomal protein L32	Cytoplasm	other
RL34_HUMAN	RPL34	ribosomal protein L34	Cytoplasm	other
RL35_HUMAN	RPL35	ribosomal protein L35	Cytoplasm	other
RL35A_HUMAN	RPL35A	ribosomal protein L35a	Cytoplasm	other
RL36_HUMAN	RPL36	ribosomal protein L36	Cytoplasm	other
RL4_HUMAN	RPL4	ribosomal protein L4	Cytoplasm	enzyme
RL5_HUMAN	RPL5	ribosomal protein L5	Cytoplasm	other
RL6_HUMAN	RPL6	ribosomal protein L6	Nucleus	other
RL7_HUMAN	RPL7	ribosomal protein L7	Nucleus	transcription regulator
RL7A_HUMAN	RPL7A	ribosomal protein L7a	Cytoplasm	other
RL8_HUMAN	RPL8	ribosomal protein L8	Other	other
RL9_HUMAN	RPL9	ribosomal protein L9	Nucleus	other
RLA0_HUMAN	RPLP0	ribosomal protein, large, P0	Cytoplasm	other
RLA1_HUMAN	RPLP1	ribosomal protein, large, P1	Cytoplasm	other
RLA2_HUMAN	RPLP2	ribosomal protein, large, P2	Cytoplasm	other
RPP30_HUMAN	RPP30	ribonuclease P/MRP 30kDa subunit	Nucleus	enzyme
RPP38_HUMAN	RPP38	ribonuclease P/MRP 38kDa subunit	Nucleus	enzyme
RS10_HUMAN	RPS10	ribosomal protein S10	Cytoplasm	other
RS11_HUMAN	RPS11	ribosomal protein S11	Cytoplasm	other
RS12_HUMAN	RPS12	ribosomal protein S12	Cytoplasm	other
RS13_HUMAN	RPS13	ribosomal protein S13	Cytoplasm	other
RS14_HUMAN	RPS14	ribosomal protein S14	Cytoplasm	translation regulator
RS15_HUMAN	RPS15	ribosomal protein S15	Cytoplasm	other
RS15A_HUMAN	RPS15A	ribosomal protein S15a	Cytoplasm	other
RS16_HUMAN	RPS16	ribosomal protein S16	Cytoplasm	other
RS18_HUMAN	RPS18	ribosomal protein S18	Cytoplasm	other
RS19_HUMAN	RPS19	ribosomal protein S19	Cytoplasm	other
RS2_HUMAN	RPS2	ribosomal protein S2	Cytoplasm	other
RS20_HUMAN	RPS20	ribosomal protein S20	Cytoplasm	other
RS23_HUMAN	RPS23	ribosomal protein S23	Cytoplasm	translation regulator
RS24_HUMAN	RPS24	ribosomal protein S24	Cytoplasm	other
RS25_HUMAN	RPS25	ribosomal protein S25	Cytoplasm	other
RS26_HUMAN	RPS26	ribosomal protein S26	Cytoplasm	other
RS27L_HUMAN	RPS27L	ribosomal protein S27 like	Cytoplasm	translation regulator
RS3_HUMAN	RPS3	ribosomal protein S3	Cytoplasm	enzyme
RS3A_HUMAN	RPS3A	ribosomal protein S3A	Nucleus	other
RS4X_HUMAN	RPS4X	ribosomal protein S4, X-linked	Cytoplasm	other
RS5_HUMAN	RPS5	ribosomal protein S5	Cytoplasm	other
RS6_HUMAN	RPS6	ribosomal protein S6	Cytoplasm	other
KS6A1_HUMAN	RPS6KA1	ribosomal protein S6 kinase, 90kDa, polypeptide 1	Cytoplasm	kinase
KS6A3_HUMAN	RPS6KA3	ribosomal protein S6 kinase, 90kDa, polypeptide 3	Cytoplasm	kinase
RS7_HUMAN	RPS7	ribosomal protein S7	Cytoplasm	other
RS8_HUMAN	RPS8	ribosomal protein S8	Cytoplasm	other
RS9_HUMAN	RPS9	ribosomal protein S9	Cytoplasm	translation regulator
RSSA_HUMAN	RPSA	ribosomal protein SA	Cytoplasm	translation regulator
RCD1_HUMAN	RQCD1	RCD1 required for cell differentiation1 homolog (S. pombe)	Cytoplasm	other
RRAGD_HUMAN	RRAGD	Ras-related GTP binding D	Cytoplasm	enzyme
RIR1_HUMAN	RRM1	ribonucleotide reductase catalytic subunit M1	Nucleus	enzyme	cytarabine/fludarabine phosphate, gemcitabine/vismodegib, bortezomib/cladribine/rituximab, gemcitabine/paclitaxel, erlotinib/gemcitabine, cyclophosphamide/fludarabine phosphate/rituximab, cladribine/cytarabine/daunorubicin, gemcitabine/oxaliplatin, gemcitabine/vinorelbine, docetaxel/gemcitabine, docetaxel/gemcitabine/vincristine, cladribine/cytarabine/filgrastim, clofarabine/cyclophosphamide/etop…
RIR2_HUMAN	RRM2	ribonucleotide reductase regulatory subunit M2	Nucleus	enzyme	cytarabine/fludarabine phosphate, bortezomib/cladribine/rituximab, gemcitabine/paclitaxel, cyclophosphamide/fludarabine phosphate/rituximab, cladribine/cytarabine/daunorubicin, gemcitabine/oxaliplatin, gemcitabine/vinorelbine, docetaxel/gemcitabine, docetaxel/gemcitabine/vincristine, cladribine/cytarabine/filgrastim, capecitabine/gemcitabine, gemcitabine/oxaliplatin/paclitaxel, cytarabine/filgras…
RIR2B_HUMAN	RRM2B	ribonucleotide reductase regulatory TP53 inducible subunit M2B	Nucleus	enzyme	bortezomib/cladribine/rituximab, cladribine/cytarabine/daunorubicin, cladribine/cytarabine/filgrastim, cladribine/cytarabine/filgrastim/mitoxantrone, cladribine/rituximab, cladribine/cytarabine/filgrastim/idarubicin, cladribine/cytarabine/filgrastim/idarubicin/plerixafor, cladribine/peginterferon alfa-2a, cladribine/cytarabine/decitabine, triapine, hydroxyurea, cladribine
RRP12_HUMAN	RRP12	ribosomal RNA processing 12 homolog	Nucleus	other
U3IP2_HUMAN	RRP9	ribosomal RNA processing 9, small subunit (SSU) processome component, homolog (yeast)	Nucleus	other
RUVB1_HUMAN	RUVBL1	RuvB-like AAA ATPase 1	Nucleus	transcription regulator
RUVB2_HUMAN	RUVBL2	RuvB-like AAA ATPase 2	Nucleus	transcription regulator
RWDD4_HUMAN	RWDD4	RWD domain containing 4	Other	other
RYR3_HUMAN	RYR3	ryanodine receptor 3	Plasma Membrane	ion channel
SAAL1_HUMAN	SAAL1	serum amyloid A like 1	Other	other
SAE1_HUMAN	SAE1	SUMO1 activating enzyme subunit 1	Cytoplasm	enzyme
SAMH1_HUMAN	SAMHD1	SAM domain and HD domain 1	Nucleus	enzyme
SAR1A_HUMAN	SAR1A	secretion associated, Ras related GTPase 1A	Cytoplasm	enzyme
SAR1B_HUMAN	SAR1B	secretion associated, Ras related GTPase 1B	Cytoplasm	enzyme
SYSC_HUMAN	SARS	seryl-tRNA synthetase	Cytoplasm	enzyme
SYSM_HUMAN	SARS2	seryl-tRNA synthetase 2, mitochondrial	Cytoplasm	enzyme
SNUT1_HUMAN	SART1	squamous cell carcinoma antigen recognized by T-cells 1	Nucleus	other
SART3_HUMAN	SART3	squamous cell carcinoma antigen recognized by T-cells 3	Nucleus	other
MTMR5_HUMAN	SBF1	SET binding factor 1	Plasma Membrane	phosphatase
SBSN_HUMAN	SBSN	suprabasin	Cytoplasm	other
SCAM1_HUMAN	SCAMP1	secretory carrier membrane protein 1	Cytoplasm	transporter
SCAM3_HUMAN	SCAMP3	secretory carrier membrane protein 3	Cytoplasm	transporter
RISC_HUMAN	SCPEP1	serine carboxypeptidase 1	Cytoplasm	peptidase
NTKL_HUMAN	SCYL1	SCY1-like, kinase-like 1	Cytoplasm	kinase
SDE2_HUMAN	SDE2	SDE2 telomere maintenance homolog (S. pombe)	Other	other
SDF2L_HUMAN	SDF2L1	stromal cell-derived factor 2-like 1	Cytoplasm	other
CAB45_HUMAN	SDF4	stromal cell derived factor 4	Cytoplasm	other
SEC13_HUMAN	SEC13	SEC13 homolog, nuclear pore and COPII coat complex component	Cytoplasm	transporter
SC16A_HUMAN	SEC16A	SEC16 homolog A, endoplasmic reticulum export factor	Cytoplasm	phosphatase
SC22B_HUMAN	SEC22B	SEC22 homolog B, vesicle trafficking protein (gene/pseudogene)	Cytoplasm	other
SC23A_HUMAN	SEC23A	Sec23 homolog A, COPII coat complex component	Cytoplasm	transporter
SC23B_HUMAN	SEC23B	Sec23 homolog B, COPII coat complex component	Extracellular Space	transporter
S23IP_HUMAN	SEC23IP	SEC23 interacting protein	Cytoplasm	other
SC24A_HUMAN	SEC24A	SEC24 homolog A, COPII coat complex component	Cytoplasm	transporter
SC24B_HUMAN	SEC24B	SEC24 homolog B, COPII coat complex component	Cytoplasm	transporter
SC24C_HUMAN	SEC24C	SEC24 homolog C, COPII coat complex component	Cytoplasm	transporter
SC31A_HUMAN	SEC31A	SEC31 homolog A, COPII coat complex component	Cytoplasm	other
SELO_HUMAN	SELO	selenoprotein O	Extracellular Space	enzyme
SEP15_HUMAN	SEP15	15 kDa selenoprotein	Cytoplasm	enzyme
SPS1_HUMAN	SEPHS1	selenophosphate synthetase 1	Other	enzyme
SEPT1_HUMAN	SEPT1	septin 1	Cytoplasm	enzyme
SEPT2_HUMAN	SEPT2	septin 2	Cytoplasm	enzyme
SEPT6_HUMAN	SEPT6	septin 6	Cytoplasm	other
SEPT7_HUMAN	SEPT7	septin 7	Cytoplasm	other
SEPT9_HUMAN	SEPT9	septin 9	Cytoplasm	enzyme
PAIRB_HUMAN	SERBP1	SERPINE1 mRNA binding protein 1	Cytoplasm	other
IPSP_HUMAN	SERPINA5	serpin peptidase inhibitor, clade A (alpha-1 antiproteinase, antitrypsin), member 5	Extracellular Space	other
SET_HUMAN	SET	SET nuclear proto-oncogene	Nucleus	phosphatase
SETD2_HUMAN	SETD2	SET domain containing 2	Cytoplasm	enzyme
SETD6_HUMAN	SETD6	SET domain containing 6	Nucleus	enzyme
SETD7_HUMAN	SETD7	SET domain containing (lysine methyltransferase) 7	Nucleus	enzyme
SF01_HUMAN	SF1	splicing factor 1	Nucleus	transcription regulator
SF3A1_HUMAN	SF3A1	splicing factor 3a subunit 1	Nucleus	other
SF3A3_HUMAN	SF3A3	splicing factor 3a subunit 3	Nucleus	other
SF3B1_HUMAN	SF3B1	splicing factor 3b subunit 1	Nucleus	other
SF3B2_HUMAN	SF3B2	splicing factor 3b subunit 2	Nucleus	other
SF3B3_HUMAN	SF3B3	splicing factor 3b subunit 3	Nucleus	other
SFPQ_HUMAN	SFPQ	splicing factor proline/glutamine-rich	Nucleus	other
SFSWA_HUMAN	SFSWAP	splicing factor, suppressor of white-apricot family	Nucleus	other
SGTA_HUMAN	SGTA	small glutamine-rich tetratricopeptide repeat (TPR)-containing, alpha	Cytoplasm	other
GLYM_HUMAN	SHMT2	serine hydroxymethyltransferase 2 (mitochondrial)	Cytoplasm	enzyme
SIR1_HUMAN	SIRT1	sirtuin 1	Nucleus	transcription regulator
SKIV2_HUMAN	SKIV2L	Ski2 like RNA helicase	Nucleus	enzyme
SK2L2_HUMAN	SKIV2L2	Ski2 like RNA helicase 2	Nucleus	other
SKP1_HUMAN	SKP1	S-phase kinase-associated protein 1	Nucleus	transcription regulator
SLBP_HUMAN	SLBP	stem-loop binding protein	Nucleus	other
AAAT_HUMAN	SLC1A5	solute carrier family 1 (neutral amino acid transporter), member 5	Plasma Membrane	transporter
4F2_HUMAN	SLC3A2	solute carrier family 3 (amino acid transporter heavy chain), member 2	Plasma Membrane	transporter
NADAP_HUMAN	SLC4A1AP	solute carrier family 4 (anion exchanger), member 1, adaptor protein	Nucleus	transporter
SC5A4_HUMAN	SLC5A4	solute carrier family 5 (glucose activated ion channel), member 4	Other	transporter
SMAD2_HUMAN	SMAD2	SMAD family member 2	Nucleus	transcription regulator
SMRC1_HUMAN	SMARCC1	SWI/SNF related, matrix associated, actin dependent regulator of chromatin, subfamily c, member 1	Nucleus	transcription regulator
SMC1A_HUMAN	SMC1A	structural maintenance of chromosomes 1A	Nucleus	transporter
SMC2_HUMAN	SMC2	structural maintenance of chromosomes 2	Nucleus	transporter
SMC3_HUMAN	SMC3	structural maintenance of chromosomes 3	Nucleus	other
SMC4_HUMAN	SMC4	structural maintenance of chromosomes 4	Nucleus	transporter
SMG1_HUMAN	SMG1	SMG1 phosphatidylinositol 3-kinase-related kinase	Cytoplasm	kinase
EST1A_HUMAN	SMG6	SMG6 nonsense mediated mRNA decay factor	Nucleus	enzyme
SMG8_HUMAN	SMG8	SMG8 nonsense mediated mRNA decay factor	Cytoplasm	enzyme
SPF30_HUMAN	SMNDC1	survival motor neuron domain containing 1	Nucleus	other
SMU1_HUMAN	SMU1	smu-1 suppressor of mec-8 and unc-52 homolog (C. elegans)	Nucleus	other
SND1_HUMAN	SND1	staphylococcal nuclease and tudor domain containing 1	Nucleus	enzyme
U520_HUMAN	SNRNP200	small nuclear ribonucleoprotein, U5 200kDa subunit	Nucleus	enzyme
RU17_HUMAN	SNRNP70	small nuclear ribonucleoprotein, U1 70kDa subunit	Nucleus	other
SNRPA_HUMAN	SNRPA	small nuclear ribonucleoprotein polypeptide A	Nucleus	other
RU2A_HUMAN	SNRPA1	small nuclear ribonucleoprotein polypeptide A'	Nucleus	other
RSMB_HUMAN	SNRPB	small nuclear ribonucleoprotein polypeptides B and B1	Nucleus	other
RU2B_HUMAN	SNRPB2	small nuclear ribonucleoprotein polypeptide B	Nucleus	other
RU1C_HUMAN	SNRPC	small nuclear ribonucleoprotein polypeptide C	Nucleus	other
SMD1_HUMAN	SNRPD1	small nuclear ribonucleoprotein D1 polypeptide	Nucleus	other
SMD2_HUMAN	SNRPD2	small nuclear ribonucleoprotein D2 polypeptide	Nucleus	other
SMD3_HUMAN	SNRPD3	small nuclear ribonucleoprotein D3 polypeptide	Nucleus	other
SORL_HUMAN	SORL1	sortilin-related receptor, L(DLR class) A repeats containing	Cytoplasm	transporter
JIP4_HUMAN	SPAG9	sperm associated antigen 9	Cytoplasm	other
SPC24_HUMAN	SPC24	SPC24, NDC80 kinetochore complex component	Cytoplasm	other
SPC25_HUMAN	SPC25	SPC25, NDC80 kinetochore complex component	Cytoplasm	other
SPCS3_HUMAN	SPCS3	signal peptidase complex subunit 3	Cytoplasm	peptidase
SPDLY_HUMAN	SPDL1	spindle apparatus coiled-coil protein 1	Nucleus	other
CYTSA_HUMAN	SPECC1L	sperm antigen with calponin homology and coiled-coil domains 1-like	Extracellular Space	other
SPG21_HUMAN	SPG21	spastic paraplegia 21 (autosomal recessive, Mast syndrome)	Plasma Membrane	enzyme
SPIT2_HUMAN	SPINT2	serine peptidase inhibitor, Kunitz type, 2	Extracellular Space	other
SPTN1_HUMAN	SPTAN1	spectrin alpha, non-erythrocytic 1	Plasma Membrane	other
SQSTM_HUMAN	SQSTM1	sequestosome 1	Cytoplasm	transcription regulator
SORCN_HUMAN	SRI	sorcin	Cytoplasm	transporter
SPEE_HUMAN	SRM	spermidine synthase	Cytoplasm	enzyme
SRP14_HUMAN	SRP14	signal recognition particle 14kDa	Cytoplasm	other
SRP19_HUMAN	SRP19	signal recognition particle 19kDa	Cytoplasm	other
SRP54_HUMAN	SRP54	signal recognition particle 54kDa	Cytoplasm	other
SRP68_HUMAN	SRP68	signal recognition particle 68kDa	Nucleus	other
SRP72_HUMAN	SRP72	signal recognition particle 72kDa	Nucleus	kinase
SRPK3_HUMAN	SRPK3	SRSF protein kinase 3	Cytoplasm	kinase
SRR_HUMAN	SRR	serine racemase	Cytoplasm	enzyme
SRRT_HUMAN	SRRT	serrate, RNA effector molecule	Nucleus	other
SRSF1_HUMAN	SRSF1	serine/arginine-rich splicing factor 1	Nucleus	other
SRS10_HUMAN	SRSF10	serine/arginine-rich splicing factor 10	Nucleus	other
SRSF2_HUMAN	SRSF2	serine/arginine-rich splicing factor 2	Nucleus	transcription regulator
SRSF3_HUMAN	SRSF3	serine/arginine-rich splicing factor 3	Nucleus	other
SRSF7_HUMAN	SRSF7	serine/arginine-rich splicing factor 7	Nucleus	other
SSXT_HUMAN	SS18	synovial sarcoma translocation, chromosome 18	Nucleus	transcription regulator
LA_HUMAN	SSB	Sjogren syndrome antigen B	Nucleus	enzyme
SSBP_HUMAN	SSBP1	single-stranded DNA binding protein 1, mitochondrial	Cytoplasm	other
SSPO_HUMAN	SSPO	SCO-spondin	Cytoplasm	other
SSA27_HUMAN	SSSCA1	Sjogren syndrome/scleroderma autoantigen 1	Other	other
SSU72_HUMAN	SSU72	SSU72 homolog, RNA polymerase II CTD phosphatase	Other	phosphatase
F10A1_HUMAN	ST13	suppression of tumorigenicity 13 (colon carcinoma) (Hsp70 interacting protein)	Cytoplasm	other
ST18_HUMAN	ST18	suppression of tumorigenicity 18, zinc finger	Nucleus	transcription regulator
STAT1_HUMAN	STAT1	signal transducer and activator of transcription 1	Nucleus	transcription regulator
STAT3_HUMAN	STAT3	signal transducer and activator of transcription 3 (acute-phase response factor)	Nucleus	transcription regulator
STA5B_HUMAN	STAT5B	signal transducer and activator of transcription 5B	Nucleus	transcription regulator
STIP1_HUMAN	STIP1	stress induced phosphoprotein 1	Cytoplasm	other	lavendustin C
STK4_HUMAN	STK4	serine/threonine kinase 4	Cytoplasm	kinase
STRA8_HUMAN	STRA8	stimulated by retinoic acid 8	Nucleus	other
STRAP_HUMAN	STRAP	serine/threonine kinase receptor associated protein	Plasma Membrane	other
STRBP_HUMAN	STRBP	spermatid perinuclear RNA binding protein	Cytoplasm	other
STRN_HUMAN	STRN	striatin	Cytoplasm	other
CHIP_HUMAN	STUB1	STIP1 homology and U-box containing protein 1, E3 ubiquitin protein ligase	Cytoplasm	enzyme
STX12_HUMAN	STX12	syntaxin 12	Cytoplasm	other
STX16_HUMAN	STX16	syntaxin 16	Cytoplasm	transporter
STX7_HUMAN	STX7	syntaxin 7	Plasma Membrane	transporter
STX8_HUMAN	STX8	syntaxin 8	Plasma Membrane	other
SUCB2_HUMAN	SUCLG2	succinate-CoA ligase, GDP-forming, beta subunit	Cytoplasm	enzyme
SUGP1_HUMAN	SUGP1	SURP and G-patch domain containing 1	Nucleus	other
SP16H_HUMAN	SUPT16H	SPT16 homolog, facilitates chromatin remodeling subunit	Nucleus	transcription regulator
SPT5H_HUMAN	SUPT5H	SPT5 homolog, DSIF elongation factor subunit	Nucleus	transcription regulator
SPT6H_HUMAN	SUPT6H	SPT6 homolog, histone chaperone	Nucleus	transcription regulator
SUV3_HUMAN	SUPV3L1	Suv3 like RNA helicase	Cytoplasm	enzyme
SURF4_HUMAN	SURF4	surfeit 4	Cytoplasm	other
SWP70_HUMAN	SWAP70	SWAP switching B-cell complex 70kDa subunit	Cytoplasm	other
SYAP1_HUMAN	SYAP1	synapse associated protein 1	Nucleus	other
KSYK_HUMAN	SYK	spleen tyrosine kinase	Cytoplasm	kinase	R-348, fostamatinib, cerdulatinib, TAK-659, entospletinib
SYMPK_HUMAN	SYMPK	symplekin	Cytoplasm	other
HNRPQ_HUMAN	SYNCRIP	synaptotagmin binding, cytoplasmic RNA interacting protein	Nucleus	other
SYNE1_HUMAN	SYNE1	spectrin repeat containing, nuclear envelope 1	Nucleus	other
SYNE2_HUMAN	SYNE2	spectrin repeat containing, nuclear envelope 2	Nucleus	other
SNG2_HUMAN	SYNGR2	synaptogyrin 2	Cytoplasm	other
SYPL1_HUMAN	SYPL1	synaptophysin-like 1	Plasma Membrane	transporter
SYT6_HUMAN	SYT6	synaptotagmin 6	Cytoplasm	transporter
TAB1_HUMAN	TAB1	TGF-beta activated kinase 1/MAP3K7 binding protein 1	Cytoplasm	enzyme
TACC3_HUMAN	TACC3	transforming, acidic coiled-coil containing protein 3	Nucleus	other
RBP56_HUMAN	TAF15	TATA-box binding protein associated factor 15	Nucleus	other
TAGL2_HUMAN	TAGLN2	transgelin 2	Cytoplasm	other
TANK_HUMAN	TANK	TRAF family member associated NFKB activator	Cytoplasm	other
TARB1_HUMAN	TARBP1	TAR (HIV-1) RNA binding protein 1	Nucleus	transcription regulator
TADBP_HUMAN	TARDBP	TAR DNA binding protein	Nucleus	transcription regulator
SYTC_HUMAN	TARS	threonyl-tRNA synthetase	Nucleus	enzyme
TBC15_HUMAN	TBC1D15	TBC1 domain family member 15	Cytoplasm	other
TBD2B_HUMAN	TBC1D2B	TBC1 domain family member 2B	Other	other
TBC9B_HUMAN	TBC1D9B	TBC1 domain family member 9B	Other	other
TBCB_HUMAN	TBCB	tubulin folding cofactor B	Other	other
TBCD_HUMAN	TBCD	tubulin folding cofactor D	Cytoplasm	other
TBK1_HUMAN	TBK1	TANK-binding kinase 1	Cytoplasm	kinase
TBL1X_HUMAN	TBL1X	transducin (beta)-like 1X-linked	Nucleus	transcription regulator
TBL1R_HUMAN	TBL1XR1	transducin (beta)-like 1 X-linked receptor 1	Nucleus	transcription regulator
TBR1_HUMAN	TBR1	T-box, brain 1	Nucleus	transcription regulator
TBRG4_HUMAN	TBRG4	transforming growth factor beta regulator 4	Cytoplasm	other
ELOC_HUMAN	TCEB1	transcription elongation factor B (SIII), polypeptide 1 (15kDa, elongin C)	Nucleus	transcription regulator
ELOB_HUMAN	TCEB2	transcription elongation factor B (SIII), polypeptide 2 (18kDa, elongin B)	Nucleus	transcription regulator
TCL1A_HUMAN	TCL1A	T-cell leukemia/lymphoma 1A	Nucleus	transcription regulator
TCPA_HUMAN	TCP1	t-complex 1	Cytoplasm	other
T11L1_HUMAN	TCP11L1	t-complex 11, testis-specific-like 1	Cytoplasm	other
TELO2_HUMAN	TELO2	telomere maintenance 2	Cytoplasm	other
TFG_HUMAN	TFG	TRK-fused gene	Cytoplasm	other
TFP11_HUMAN	TFIP11	tuftelin interacting protein 11	Extracellular Space	other
TFR1_HUMAN	TFRC	transferrin receptor	Plasma Membrane	transporter
TGS1_HUMAN	TGS1	trimethylguanosine synthase 1	Nucleus	enzyme
THADA_HUMAN	THADA	thyroid adenoma associated	Other	other
THG1_HUMAN	THG1L	tRNA-histidine guanylyltransferase 1-like	Cytoplasm	enzyme
THNS1_HUMAN	THNSL1	threonine synthase like 1	Nucleus	kinase
THOC2_HUMAN	THOC2	THO complex 2	Nucleus	other
THUM1_HUMAN	THUMPD1	THUMP domain containing 1	Other	other
THUM3_HUMAN	THUMPD3	THUMP domain containing 3	Other	other
TIA1_HUMAN	TIA1	TIA1 cytotoxic granule-associated RNA binding protein	Nucleus	other
TIAR_HUMAN	TIAL1	TIA1 cytotoxic granule-associated RNA binding protein-like 1	Nucleus	transcription regulator
TCAM1_HUMAN	TICAM1	toll-like receptor adaptor molecule 1	Nucleus	other
TIFA_HUMAN	TIFA	TRAF-interacting protein with forkhead-associated domain	Other	other
TIM_HUMAN	TIMELESS	timeless circadian clock	Nucleus	other
TIPRL_HUMAN	TIPRL	TOR signaling pathway regulator	Cytoplasm	other
ZO2_HUMAN	TJP2	tight junction protein 2	Plasma Membrane	kinase
ZO3_HUMAN	TJP3	tight junction protein 3	Cytoplasm	other
KITH_HUMAN	TK1	thymidine kinase 1, soluble	Cytoplasm	kinase
TKT_HUMAN	TKT	transketolase	Cytoplasm	enzyme
TLE3_HUMAN	TLE3	transducin like enhancer of split 3	Nucleus	other
TLN1_HUMAN	TLN1	talin 1	Plasma Membrane	other
TLN2_HUMAN	TLN2	talin 2	Nucleus	other
TMA16_HUMAN	TMA16	translation machinery associated 16 homolog	Nucleus	other
TMC1_HUMAN	TMC1	transmembrane channel like 1	Plasma Membrane	ion channel
TMCO6_HUMAN	TMCO6	transmembrane and coiled-coil domains 6	Other	other
TMEDA_HUMAN	TMED10	transmembrane p24 trafficking protein 10	Cytoplasm	transporter
TMED5_HUMAN	TMED5	transmembrane p24 trafficking protein 5	Cytoplasm	other
TMOD3_HUMAN	TMOD3	tropomodulin 3	Cytoplasm	other
TNIP1_HUMAN	TNIP1	TNFAIP3 interacting protein 1	Nucleus	other
TNPO1_HUMAN	TNPO1	transportin 1	Nucleus	transporter
TNPO2_HUMAN	TNPO2	transportin 2	Nucleus	transporter
TNPO3_HUMAN	TNPO3	transportin 3	Cytoplasm	other
TOM34_HUMAN	TOMM34	translocase of outer mitochondrial membrane 34	Cytoplasm	other
TONSL_HUMAN	TONSL	tonsoku-like, DNA repair protein	Cytoplasm	transcription regulator
TOPZ1_HUMAN	TOPAZ1	testis and ovary specific PAZ domain containing 1	Other	other
P53_HUMAN	TP53	tumor protein p53	Nucleus	transcription regulator	CGM097, kevetrin
TP53B_HUMAN	TP53BP1	tumor protein p53 binding protein 1	Nucleus	transcription regulator
PRPK_HUMAN	TP53RK	TP53 regulating kinase	Nucleus	kinase
TPK1_HUMAN	TPK1	thiamin pyrophosphokinase 1	Cytoplasm	kinase
TPM3_HUMAN	TPM3	tropomyosin 3	Cytoplasm	other
TPP1_HUMAN	TPP1	tripeptidyl peptidase I	Cytoplasm	peptidase
TPP2_HUMAN	TPP2	tripeptidyl peptidase II	Cytoplasm	peptidase
TPR_HUMAN	TPR	translocated promoter region, nuclear basket protein	Nucleus	transporter
TRNK1_HUMAN	TRANK1	tetratricopeptide repeat and ankyrin repeat containing 1	Nucleus	transcription regulator
TRAP1_HUMAN	TRAP1	TNF receptor-associated protein 1	Cytoplasm	enzyme
TPPC3_HUMAN	TRAPPC3	trafficking protein particle complex 3	Cytoplasm	other	OTX015
RO52_HUMAN	TRIM21	tripartite motif containing 21	Nucleus	enzyme
TRI22_HUMAN	TRIM22	tripartite motif containing 22	Cytoplasm	transcription regulator
TRI25_HUMAN	TRIM25	tripartite motif containing 25	Cytoplasm	transcription regulator
TIF1B_HUMAN	TRIM28	tripartite motif containing 28	Nucleus	transcription regulator
TRI41_HUMAN	TRIM41	tripartite motif containing 41	Cytoplasm	other
TRI56_HUMAN	TRIM56	tripartite motif containing 56	Cytoplasm	enzyme
TRIO_HUMAN	TRIO	trio Rho guanine nucleotide exchange factor	Cytoplasm	kinase
PCH2_HUMAN	TRIP13	thyroid hormone receptor interactor 13	Cytoplasm	transcription regulator
TRIP4_HUMAN	TRIP4	thyroid hormone receptor interactor 4	Nucleus	transcription regulator
MRRP1_HUMAN	TRMT10C	tRNA methyltransferase 10C, mitochondrial RNase P subunit	Cytoplasm	enzyme
TRM11_HUMAN	TRMT11	tRNA methyltransferase 11 homolog	Other	enzyme
TRM6_HUMAN	TRMT6	tRNA methyltransferase 6	Nucleus	other
TSAP1_HUMAN	TRNAU1AP	tRNA selenocysteine 1 associated protein 1	Nucleus	other
RO60_HUMAN	TROVE2	TROVE domain family member 2	Nucleus	other
SEN15_HUMAN	TSEN15	tRNA splicing endonuclease subunit 15	Nucleus	enzyme
SEN34_HUMAN	TSEN34	tRNA splicing endonuclease subunit 34	Nucleus	enzyme
TSN_HUMAN	TSN	translin	Nucleus	other
TSR1_HUMAN	TSR1	TSR1, 20S rRNA accumulation, homolog (S. cerevisiae)	Nucleus	other
TSSC1_HUMAN	TSSC1	tumor suppressing subtransferable candidate 1	Other	other
TSSC4_HUMAN	TSSC4	tumor suppressing subtransferable candidate 4	Other	other
TTC1_HUMAN	TTC1	tetratricopeptide repeat domain 1	Cytoplasm	other
TTC19_HUMAN	TTC19	tetratricopeptide repeat domain 19	Cytoplasm	other
TT21B_HUMAN	TTC21B	tetratricopeptide repeat domain 21B	Extracellular Space	other
TTC27_HUMAN	TTC27	tetratricopeptide repeat domain 27	Other	other
TTC37_HUMAN	TTC37	tetratricopeptide repeat domain 37	Nucleus	other
TTC4_HUMAN	TTC4	tetratricopeptide repeat domain 4	Other	other
TTC5_HUMAN	TTC5	tetratricopeptide repeat domain 5	Nucleus	other
TTC9C_HUMAN	TTC9C	tetratricopeptide repeat domain 9C	Other	other
TTI1_HUMAN	TTI1	TELO2 interacting protein 1	Cytoplasm	other
TTL12_HUMAN	TTLL12	tubulin tyrosine ligase like 12	Other	other
TBA1B_HUMAN	TUBA1B	tubulin alpha 1b	Cytoplasm	other
TBA4A_HUMAN	TUBA4A	tubulin alpha 4a	Cytoplasm	other	epothilone B, colchicine/probenecid, larotaxel, eribulin, davunetide, vintafolide, milataxel, cevipabulin, cabazitaxel, gemcitabine/paclitaxel, docetaxel/prednisone, capecitabine/docetaxel, paclitaxel/trastuzumab, cabazitaxel/prednisone, cyclophosphamide/prednisone/vincristine, docetaxel/hydrocortisone, cyclophosphamide/docetaxel, gemcitabine/vinorelbine, cyclophosphamide/daunorubicin/imatinib/pr…
TBAL3_HUMAN	TUBAL3	tubulin alpha like 3	Other	enzyme
TBB5_HUMAN	TUBB	tubulin beta class I	Cytoplasm	other	ixabepilone
TBB2A_HUMAN	TUBB2A	tubulin beta 2A class IIa	Cytoplasm	other	epothilone B, colchicine/probenecid, larotaxel, ABT-751, eribulin, simotaxel, davunetide, vintafolide, milataxel, cevipabulin, gemcitabine/paclitaxel, docetaxel/prednisone, capecitabine/docetaxel, paclitaxel/trastuzumab, cyclophosphamide/prednisone/vincristine, docetaxel/hydrocortisone, cyclophosphamide/docetaxel, gemcitabine/vinorelbine, cyclophosphamide/daunorubicin/imatinib/prednisone/vincrist…
TBB3_HUMAN	TUBB3	tubulin beta 3 class III	Cytoplasm	other	epothilone B, ixabepilone, colchicine/probenecid, larotaxel, ABT-751, eribulin, simotaxel, davunetide, vintafolide, milataxel, cevipabulin, gemcitabine/paclitaxel, docetaxel/prednisone, capecitabine/docetaxel, paclitaxel/trastuzumab, capecitabine/ixabepilone, cyclophosphamide/prednisone/vincristine, docetaxel/hydrocortisone, cyclophosphamide/docetaxel, gemcitabine/vinorelbine, cyclophosphamide/da…
TBB4A_HUMAN	TUBB4A	tubulin beta 4A class IVa	Cytoplasm	other	epothilone B, colchicine/probenecid, larotaxel, ABT-751, eribulin, simotaxel, davunetide, vintafolide, milataxel, cevipabulin, gemcitabine/paclitaxel, docetaxel/prednisone, capecitabine/docetaxel, paclitaxel/trastuzumab, cyclophosphamide/prednisone/vincristine, docetaxel/hydrocortisone, cyclophosphamide/docetaxel, gemcitabine/vinorelbine, cyclophosphamide/daunorubicin/imatinib/prednisone/vincrist…
TBB4B_HUMAN	TUBB4B	tubulin beta 4B class IVb	Cytoplasm	other	epothilone B, colchicine/probenecid, larotaxel, ABT-751, eribulin, simotaxel, davunetide, vintafolide, milataxel, cevipabulin, gemcitabine/paclitaxel, docetaxel/prednisone, capecitabine/docetaxel, paclitaxel/trastuzumab, cyclophosphamide/prednisone/vincristine, docetaxel/hydrocortisone, cyclophosphamide/docetaxel, gemcitabine/vinorelbine, cyclophosphamide/daunorubicin/imatinib/prednisone/vincrist…
TBB6_HUMAN	TUBB6	tubulin beta 6 class V	Cytoplasm	other
TBB8_HUMAN	TUBB8	tubulin beta 8 class VIII	Cytoplasm	other
EFTU_HUMAN	TUFM	Tu translation elongation factor, mitochondrial	Cytoplasm	translation regulator
STPAP_HUMAN	TUT1	terminal uridylyl transferase 1, U6 snRNA-specific	Nucleus	enzyme
TXLNA_HUMAN	TXLNA	taxilin alpha	Extracellular Space	cytokine
TXND5_HUMAN	TXNDC5	thioredoxin domain containing 5 (endoplasmic reticulum)	Cytoplasm	enzyme
TXND9_HUMAN	TXNDC9	thioredoxin domain containing 9	Cytoplasm	other
TRXR1_HUMAN	TXNRD1	thioredoxin reductase 1	Cytoplasm	enzyme	arsenic trioxide/tretinoin, arsenic trioxide/daunorubicin/tretinoin, arsenic trioxide/gemtuzumab ozogamicin/tretinoin, arsenic trioxide/idarubicin/tretinoin, ethaselen, arsenic trioxide
TYSY_HUMAN	TYMS	thymidylate synthetase	Nucleus	enzyme	flucytosine, 5-fluorouracil, tegafur, trimethoprim, cyclophosphamide/epirubicin/5-fluorouracil, pralatrexate, 5-fluorouracil/oxaliplatin, capecitabine/irinotecan, 5-fluorouracil/irinotecan, capecitabine/docetaxel, capecitabine/lapatinib, capecitabine/ixabepilone, bevacizumab/5-fluorouracil, bevacizumab/capecitabine/oxaliplatin, cyclophosphamide/docetaxel/epirubicin/5-fluorouracil/trastuzumab, cap…
U2AF1_HUMAN	U2AF1/U2AF1L5	U2 small nuclear RNA auxiliary factor 1	Nucleus	other
U2AF2_HUMAN	U2AF2	U2 small nuclear RNA auxiliary factor 2	Nucleus	other
SR140_HUMAN	U2SURP	U2 snRNP-associated SURP domain containing	Nucleus	other
UBA1_HUMAN	UBA1	ubiquitin-like modifier activating enzyme 1	Cytoplasm	enzyme
UBA3_HUMAN	UBA3	ubiquitin-like modifier activating enzyme 3	Cytoplasm	enzyme
UBA5_HUMAN	UBA5	ubiquitin-like modifier activating enzyme 5	Cytoplasm	enzyme
RL40_HUMAN	UBA52	ubiquitin A-52 residue ribosomal protein fusion product 1	Cytoplasm	enzyme
UBAC1_HUMAN	UBAC1	UBA domain containing 1	Nucleus	other
UBAP2_HUMAN	UBAP2	ubiquitin associated protein 2	Cytoplasm	other
UBP2L_HUMAN	UBAP2L	ubiquitin associated protein 2 like	Other	other
UBE2C_HUMAN	UBE2C	ubiquitin conjugating enzyme E2C	Cytoplasm	enzyme
UBE2O_HUMAN	UBE2O	ubiquitin conjugating enzyme E2O	Nucleus	enzyme
UBE3A_HUMAN	UBE3A	ubiquitin protein ligase E3A	Nucleus	enzyme
UBE3B_HUMAN	UBE3B	ubiquitin protein ligase E3B	Extracellular Space	enzyme
UBE3C_HUMAN	UBE3C	ubiquitin protein ligase E3C	Nucleus	enzyme
UBE4A_HUMAN	UBE4A	ubiquitination factor E4A	Cytoplasm	enzyme
UBE4B_HUMAN	UBE4B	ubiquitination factor E4B	Cytoplasm	enzyme
UBL7_HUMAN	UBL7	ubiquitin like 7	Other	other
UBQL1_HUMAN	UBQLN1	ubiquilin 1	Cytoplasm	other
UBQL2_HUMAN	UBQLN2	ubiquilin 2	Nucleus	other
UBQL4_HUMAN	UBQLN4	ubiquilin 4	Cytoplasm	other
UBR1_HUMAN	UBR1	ubiquitin protein ligase E3 component n-recognin 1	Cytoplasm	enzyme
UBR2_HUMAN	UBR2	ubiquitin protein ligase E3 component n-recognin 2	Nucleus	enzyme
UBR3_HUMAN	UBR3	ubiquitin protein ligase E3 component n-recognin 3 (putative)	Other	enzyme
UBR5_HUMAN	UBR5	ubiquitin protein ligase E3 component n-recognin 5	Nucleus	enzyme
UBX2A_HUMAN	UBXN2A	UBX domain protein 2A	Other	other
UBXN4_HUMAN	UBXN4	UBX domain protein 4	Extracellular Space	other
UBXN7_HUMAN	UBXN7	UBX domain protein 7	Nucleus	other
UCHL3_HUMAN	UCHL3	ubiquitin C-terminal hydrolase L3	Cytoplasm	peptidase
UCHL5_HUMAN	UCHL5	ubiquitin C-terminal hydrolase L5	Cytoplasm	peptidase
UCK2_HUMAN	UCK2	uridine-cytidine kinase 2	Cytoplasm	kinase
UCKL1_HUMAN	UCKL1	uridine-cytidine kinase 1-like 1	Cytoplasm	kinase
UFD1_HUMAN	UFD1L	ubiquitin fusion degradation 1 like (yeast)	Cytoplasm	peptidase
UGGG1_HUMAN	UGGT1	UDP-glucose glycoprotein glucosyltransferase 1	Cytoplasm	enzyme
UGPA_HUMAN	UGP2	UDP-glucose pyrophosphorylase 2	Cytoplasm	enzyme
URFB1_HUMAN	UHRF1BP1	UHRF1 binding protein 1	Other	other
U119B_HUMAN	UNC119B	unc-119 lipid binding chaperone B	Other	other
UN45A_HUMAN	UNC45A	unc-45 myosin chaperone A	Plasma Membrane	other
RENT1_HUMAN	UPF1	UPF1 regulator of nonsense transcripts homolog (yeast)	Nucleus	enzyme
RENT2_HUMAN	UPF2	UPF2 regulator of nonsense transcripts homolog (yeast)	Cytoplasm	other
QCR2_HUMAN	UQCRC2	ubiquinol-cytochrome c reductase core protein II	Cytoplasm	enzyme
RMP_HUMAN	URI1	URI1 prefoldin-like chaperone	Nucleus	transcription regulator
USO1_HUMAN	USO1	USO1 vesicle transport factor	Cytoplasm	transporter
UBP11_HUMAN	USP11	ubiquitin specific peptidase 11	Nucleus	peptidase
UBP13_HUMAN	USP13	ubiquitin specific peptidase 13 (isopeptidase T-3)	Other	peptidase
UBP14_HUMAN	USP14	ubiquitin specific peptidase 14 (tRNA-guanine transglycosylase)	Cytoplasm	peptidase
UBP15_HUMAN	USP15	ubiquitin specific peptidase 15	Cytoplasm	peptidase
UBP24_HUMAN	USP24	ubiquitin specific peptidase 24	Other	peptidase
UBP25_HUMAN	USP25	ubiquitin specific peptidase 25	Cytoplasm	peptidase
UBP28_HUMAN	USP28	ubiquitin specific peptidase 28	Nucleus	peptidase
UBP34_HUMAN	USP34	ubiquitin specific peptidase 34	Extracellular Space	peptidase
UBP47_HUMAN	USP47	ubiquitin specific peptidase 47	Cytoplasm	peptidase
UBP48_HUMAN	USP48	ubiquitin specific peptidase 48	Plasma Membrane	peptidase
UBP5_HUMAN	USP5	ubiquitin specific peptidase 5 (isopeptidase T)	Cytoplasm	peptidase
UBP7_HUMAN	USP7	ubiquitin specific peptidase 7 (herpes virus-associated)	Nucleus	peptidase
USP9X_HUMAN	USP9X	ubiquitin specific peptidase 9, X-linked	Plasma Membrane	peptidase
USP9Y_HUMAN	USP9Y	ubiquitin specific peptidase 9, Y-linked	Cytoplasm	peptidase
UTP18_HUMAN	UTP18	UTP18 small subunit processome component	Nucleus	other
UTP20_HUMAN	UTP20	UTP20 small subunit processome component	Nucleus	other
UXT_HUMAN	UXT	ubiquitously expressed prefoldin like chaperone	Cytoplasm	other
VAMP7_HUMAN	VAMP7	vesicle associated membrane protein 7	Cytoplasm	transporter
SYVC_HUMAN	VARS	valyl-tRNA synthetase	Cytoplasm	enzyme
SYVM_HUMAN	VARS2	valyl-tRNA synthetase 2, mitochondrial	Cytoplasm	enzyme
VAV_HUMAN	VAV1	vav guanine nucleotide exchange factor 1	Nucleus	transcription regulator
PFD3_HUMAN	VBP1	von Hippel-Lindau binding protein 1	Cytoplasm	other
VINC_HUMAN	VCL	vinculin	Plasma Membrane	enzyme
TERA_HUMAN	VCP	valosin containing protein	Cytoplasm	enzyme	CB-5083
VCIP1_HUMAN	VCPIP1	valosin containing protein (p97)/p47 complex interacting protein 1	Cytoplasm	peptidase
VPRBP_HUMAN	VPRBP	Vpr (HIV-1) binding protein	Nucleus	other
VP13C_HUMAN	VPS13C	vacuolar protein sorting 13 homolog C (S. cerevisiae)	Cytoplasm	other
VP13D_HUMAN	VPS13D	vacuolar protein sorting 13 homolog D (S. cerevisiae)	Cytoplasm	other
VPS16_HUMAN	VPS16	VPS16, CORVET/HOPS core subunit	Cytoplasm	transporter
VPS18_HUMAN	VPS18	VPS18 CORVET/HOPS core subunit	Cytoplasm	transporter
VPS25_HUMAN	VPS25	vacuolar protein sorting 25 homolog (S. cerevisiae)	Cytoplasm	other
VP26A_HUMAN	VPS26A	VPS26 retromer complex component A	Cytoplasm	transporter
VPS28_HUMAN	VPS28	vacuolar protein sorting 28 homolog (S. cerevisiae)	Cytoplasm	transporter
VP33A_HUMAN	VPS33A	VPS33A, CORVET/HOPS core subunit	Cytoplasm	transporter
VP33B_HUMAN	VPS33B	vacuolar protein sorting 33 homolog B (yeast)	Cytoplasm	transporter
VPS35_HUMAN	VPS35	VPS35 retromer complex component	Cytoplasm	transporter
VP37A_HUMAN	VPS37A	vacuolar protein sorting 37 homolog A (S. cerevisiae)	Cytoplasm	other
VPS8_HUMAN	VPS8	VPS8, CORVET complex subunit	Other	other
VTNC_HUMAN	VTN	vitronectin	Extracellular Space	other
VWA3B_HUMAN	VWA3B	von Willebrand factor A domain containing 3B	Other	other
VWA8_HUMAN	VWA8	von Willebrand factor A domain containing 8	Other	other
WAPL_HUMAN	WAPL	WAPL cohesin release factor	Nucleus	other
SYWC_HUMAN	WARS	tryptophanyl-tRNA synthetase	Cytoplasm	enzyme
WASF1_HUMAN	WASF1	WAS protein family member 1	Nucleus	other
WASF2_HUMAN	WASF2	WAS protein family member 2	Plasma Membrane	other
WBP2_HUMAN	WBP2	WW domain binding protein 2	Cytoplasm	other
WBP4_HUMAN	WBP4	WW domain binding protein 4	Cytoplasm	other
WBS22_HUMAN	WBSCR22	Williams Beuren syndrome chromosome region 22	Nucleus	enzyme
WDFY4_HUMAN	WDFY4	WDFY family member 4	Other	other
WDHD1_HUMAN	WDHD1	WD repeat and HMG-box DNA binding protein 1	Nucleus	other
WDR36_HUMAN	WDR36	WD repeat domain 36	Extracellular Space	other
WDR6_HUMAN	WDR6	WD repeat domain 6	Cytoplasm	other
WDR61_HUMAN	WDR61	WD repeat domain 61	Nucleus	other
WDR62_HUMAN	WDR62	WD repeat domain 62	Nucleus	other
WDR7_HUMAN	WDR7	WD repeat domain 7	Cytoplasm	other
MEP50_HUMAN	WDR77	WD repeat domain 77	Nucleus	transcription regulator
WDR82_HUMAN	WDR82	WD repeat domain 82	Nucleus	other
WDR87_HUMAN	WDR87	WD repeat domain 87	Other	other
WDR90_HUMAN	WDR90	WD repeat domain 90	Other	other
WAP53_HUMAN	WRAP53	WD repeat containing, antisense to TP53	Nucleus	other
WRN_HUMAN	WRN	Werner syndrome, RecQ helicase-like	Nucleus	enzyme
WRIP1_HUMAN	WRNIP1	Werner helicase interacting protein 1	Nucleus	enzyme
XIAP_HUMAN	XIAP	X-linked inhibitor of apoptosis	Cytoplasm	enzyme	XIAP antisense oligonucleotide AEG35156, birinapant, idronoxil
XPP3_HUMAN	XPNPEP3	X-prolyl aminopeptidase 3, mitochondrial	Cytoplasm	peptidase
XPO1_HUMAN	XPO1	exportin 1	Nucleus	transporter	selinexor
XPO4_HUMAN	XPO4	exportin 4	Nucleus	transporter
XPO5_HUMAN	XPO5	exportin 5	Nucleus	transporter
XPO7_HUMAN	XPO7	exportin 7	Nucleus	transporter
XPOT_HUMAN	XPOT	exportin, tRNA	Nucleus	other
XRCC5_HUMAN	XRCC5	X-ray repair complementing defective repair in Chinese hamster cells 5	Nucleus	enzyme
XRCC6_HUMAN	XRCC6	X-ray repair complementing defective repair in Chinese hamster cells 6	Nucleus	enzyme
XRN1_HUMAN	XRN1	5'-3' exoribonuclease 1	Cytoplasm	enzyme
XRN2_HUMAN	XRN2	5'-3' exoribonuclease 2	Nucleus	enzyme
SYYC_HUMAN	YARS	tyrosyl-tRNA synthetase	Cytoplasm	enzyme
YBOX1_HUMAN	YBX1	Y-box binding protein 1	Nucleus	transcription regulator
YBOX2_HUMAN	YBX2	Y-box binding protein 2	Cytoplasm	translation regulator
YLPM1_HUMAN	YLPM1	YLP motif containing 1	Nucleus	transcription regulator
YTDC2_HUMAN	YTHDC2	YTH domain containing 2	Cytoplasm	enzyme
YTHD2_HUMAN	YTHDF2	YTH N(6)-methyladenosine RNA binding protein 2	Cytoplasm	other
YTHD3_HUMAN	YTHDF3	YTH N(6)-methyladenosine RNA binding protein 3	Cytoplasm	other
1433B_HUMAN	YWHAB	tyrosine 3-monooxygenase/tryptophan 5-monooxygenase activation protein, beta	Cytoplasm	transcription regulator
1433E_HUMAN	YWHAE	tyrosine 3-monooxygenase/tryptophan 5-monooxygenase activation protein, epsilon	Cytoplasm	other
1433G_HUMAN	YWHAG	tyrosine 3-monooxygenase/tryptophan 5-monooxygenase activation protein, gamma	Cytoplasm	other
1433F_HUMAN	YWHAH	tyrosine 3-monooxygenase/tryptophan 5-monooxygenase activation protein, eta	Cytoplasm	transcription regulator
1433T_HUMAN	YWHAQ	tyrosine 3-monooxygenase/tryptophan 5-monooxygenase activation protein, theta	Cytoplasm	other
1433Z_HUMAN	YWHAZ	tyrosine 3-monooxygenase/tryptophan 5-monooxygenase activation protein, zeta	Cytoplasm	enzyme
ARCH_HUMAN	ZBTB8OS	zinc finger and BTB domain containing 8 opposite strand	Cytoplasm	other
ZC3H4_HUMAN	ZC3H4	zinc finger CCCH-type containing 4	Other	other
ZC3H8_HUMAN	ZC3H8	zinc finger CCCH-type containing 8	Nucleus	transcription regulator
ZCHC8_HUMAN	ZCCHC8	zinc finger, CCHC domain containing 8	Nucleus	other
ZC3H1_HUMAN	ZFC3H1	zinc finger, C3H1-type containing	Extracellular Space	other
ZFY26_HUMAN	ZFYVE26	zinc finger, FYVE domain containing 26	Cytoplasm	other
ZGPAT_HUMAN	ZGPAT	zinc finger, CCCH-type with G-patch domain	Nucleus	transcription regulator
ZN292_HUMAN	ZNF292	zinc finger protein 292	Nucleus	transcription regulator
ZN326_HUMAN	ZNF326	zinc finger protein 326	Nucleus	transcription regulator
ZN511_HUMAN	ZNF511	zinc finger protein 511	Nucleus	other
ZN609_HUMAN	ZNF609	zinc finger protein 609	Nucleus	other
ZNF74_HUMAN	ZNF74	zinc finger protein 74	Nucleus	other
ZNFX1_HUMAN	ZNFX1	zinc finger, NFX1-type containing 1	Nucleus	transcription regulator
ZPR1_HUMAN	ZPR1	ZPR1 zinc finger	Nucleus	other
ZW10_HUMAN	ZW10	zw10 kinetochore protein	Nucleus	other
ZWILC_HUMAN	ZWILCH	zwilch kinetochore protein	Nucleus	other
